# Supplementary material for: Polarization consistent basis sets using the projector augmented wave method: a renovation brought by PAW into Gaussian basis sets
Source: Royal Society of Chemistry journal article supplement (doi:10.1039/d0cp05229a), 2020-01-01
Supplement: d0cp05229a1.zip [file d0cp05229a1.zip]

## Sheet: RMSD-GGA
	pc-3	pc-2	pc-2-u	pc-1	pc-1-u		def2-QZVP	def2-TZVP	def2-TZVP-u	def2-SVP	def2-SVP-u		cc-pVQZ	cc-pVTZ	cc-pVTZ-u	cc-pVDZ	cc-pVDZ-u		6-311G(2df,2pd)	6-311G(2df,2pd)-u	6-31G(d,p)	6-31G(d,p)-u		SBKJC	Stuttgart		L1-u	L2-u	L1	L2	L0.5
MaxAE	0.0404045	0.0369925	0.0373574	0.108449	0.109673		0.0473494	0.0868316	0.0751637	0.244225	0.131942		0.0409456	0.054479	0.052628	0.137145	0.125368		0.0545225	0.044195	0.101731	0.0892526		0.22927	0.562225		0.181543	0.0516518	0.105934	0.0515554	0.225766
MAE	0.00293029	0.00510305	0.00487113	0.0153693	0.0125665		0.00326051	0.00528555	0.00505505	0.0154201	0.0118988		0.0044077	0.0066585	0.00671373	0.0179276	0.0140945		0.00571513	0.00564196	0.0134247	0.0110062		0.0274412	0.0532374		0.0125863	0.00480108	0.0160871	0.00518971	0.0216702
1,3-butadiene	0.0118818	0.0169998	0.0146566	0.0164702	0.024959		0.0227291	0.015459	0.0223126	0.0556493	0.0169132		0.0167999	0.0238615	0.0213474	0.0317515	0.0208799		0.0195979	0.0106541	0.0194855	0.0158534		0.0487943	0.0613643		0.0258135	0.0152471	0.0200651	0.0146739	0.0458888
2-butyne	0.0225416	0.0296749	0.00639035	0.015256	0.0097891		0.00306114	0.0101178	0.00613256	0.0209426	0.00877682		0.00554994	0.00589635	0.00603229	0.0216311	0.0134647		0.00573347	0.0038173	0.0157758	0.00968396		0.039109	0.0158413		0.00970699	0.00604994	0.0145942	0.00583637	0.0261706
2-methyl-1-propene	0.0124551	0.0142187	0.0144048	0.0202417	0.0185542		0.013124	0.0151501	0.015175	0.0231254	0.0193		0.0130448	0.0154362	0.0154635	0.0230386	0.0203382		0.0155168	0.0159873	0.0218615	0.0191387		0.033687	0.0209515		0.0180032	0.0146041	0.0195775	0.0144169	0.0287997
acetaldehyde	0.011377	0.00841627	0.00945136	0.0132043	0.0119752		0.00436289	0.00902025	0.0118582	0.0155062	0.0129327		0.0139916	0.00893597	0.00877934	0.0159655	0.013104		0.00874805	0.00787023	0.0137376	0.0123463		0.0223911	0.016778		0.0113913	0.00844004	0.0124437	0.00831332	0.0248676
acetamide	0.006073	0.00684326	0.0068695	0.0133919	0.0109176		0.00641377	0.00713506	0.00682252	0.0154061	0.0104466		0.00633441	0.00677596	0.00684793	0.0154649	0.0116537		0.00730872	0.00717721	0.0126555	0.0102871		0.0246018	0.016503		0.0135184	0.0135303	0.0154244	0.0134722	0.0281573
aceticacid	0.0291464	0.0103962	0.0113466	0.0134949	0.016819		0.00509303	0.0110719	0.0234089	0.0173132	0.0133579		0.0105234	0.0143105	0.0172523	0.021119	0.0101383		0.00973013	0.0172193	0.0152972	0.00962443		0.0243313	0.0240203		0.0141289	0.0123032	0.0153726	0.0123616	0.0223779
acetone	0.0161278	0.0165697	0.0179861	0.0249054	0.0255376		0.0158463	0.0185224	0.0194514	0.0259591	0.0259642		0.0165254	0.0193027	0.0187371	0.0250515	0.0251658		0.0215949	0.0201884	0.024792	0.0235608		0.034367	0.0270822		0.0218062	0.0171763	0.0221611	0.0168501	0.0332975
acetonitrile	0.00131818	0.00196686	0.00184463	0.00961619	0.00559325		0.00155015	0.00272084	0.00247562	0.0130766	0.00563202		0.00155262	0.00232141	0.00234487	0.0139361	0.00813864		0.00244516	0.00222655	0.0102115	0.00580971		0.0232732	0.0107264		0.00492276	0.00197221	0.00859643	0.00201257	0.0176503
acetylene	0.00018307	0.000961833	0.000531995	0.0117913	0.00264424		0.000230212	0.00179193	0.00103433	0.0154807	0.00193935		9.438e-05	0.000424353	0.000611789	0.0143178	0.00588979		0.00032544	0.00038824	0.00800513	0.00162854		0.0276859	0.0113223		0.00111391	0.000217769	0.00916064	0.000523783	0.00780196
acetylfluoride	0.0127744	0.010397	0.0111711	0.0139659	0.0126666		0.00986215	0.0119449	0.0119554	0.01673	0.013041		0.0126829	0.0114629	0.0130927	0.0163616	0.0133283		0.0110193	0.0115453	0.0149366	0.0129236		0.0223376	0.0215921		0.0133352	0.0115228	0.0143651	0.0114197	0.0221921
acrylonitrile	0.00282726	0.00320763	0.00281181	0.0129286	0.00760585		0.00134412	0.00299017	0.00246165	0.015994	0.00686279		0.00249406	0.00190853	0.00211591	0.015307	0.00911844		0.00173517	0.0023007	0.0108712	0.0062435		0.0280613	0.0150138		0.00557808	0.0031808	0.0101595	0.00338429	0.0161584
allene	0.00124276	0.00173716	0.00150932	0.0125405	0.00563003		0.00117355	0.00284443	0.00240826	0.0179887	0.00609704		0.00111019	0.00168865	0.00169928	0.0166917	0.00944384		0.00150079	0.00140436	0.0113948	0.00534083		0.0323802	0.013845		0.00461955	0.00142714	0.0105453	0.00173616	0.0144464
ammonia	0.000804597	0.00227768	0.00209225	0.0108097	0.00234111		0.000352859	0.00200882	0.00145593	0.0189361	0.0114336		0.00353994	0.00639674	0.00644567	0.0235202	0.0133288		0.0109091	0.0114141	0.0121391	0.00967315		0.0114796	0.00893908		0.0103414	0.00465759	0.00910192	0.00438789	0.0399335
aziridine	0.00255551	0.00398015	0.00383191	0.0125312	0.00821096		0.00302595	0.00465731	0.00436951	0.0152288	0.00836334		0.00278236	0.00361323	0.00343518	0.0146577	0.00943307		0.00375165	0.00356206	0.0100801	0.00711117		0.0189321	0.0240889		0.010883	0.00446926	0.0141561	0.0047334	0.0313643
b2	1.7e-05	0.000128	3.5e-05	0.004748	0.00148		0.000249	0.000814	0.00069	0.008343	0.002458		1e-06	0.000456	0.000609	0.008401	0.005414		2e-06	7.3e-05	0.003913	0.000894		0.023344	0.014007		0.00161037	0.00108269	0.00326554	0.00103192	0.0106015
b2h6	0.00220674	0.00386704	0.003416	0.0175132	0.00759058		0.00302608	0.005169	0.00472556	0.0235526	0.0090242		0.00270774	0.0040804	0.00426501	0.0238435	0.009711		0.00441843	0.00358297	0.0104674	0.00650496		0.0159452	0.022512		0.00683862	0.00375776	0.0132461	0.00455073	0.0223135
be2	0.0007135	0.0035735	0.0011915	0.0139345	0.0110585		0.0014875	0.0121005	0.0085275	0.0151455	0.0123015		0.002063	0.0026295	0.001455	0.0109715	0.0068265		0.0001245	0.0022005	0.0131165	0.0073785		0.0512035	0.0228025		0.0407533	0.00246648	0.0408512	0.00689709	0.0305383
be2h4	0.000802625	0.000945294	0.00142132	0.0065385	0.00441665		0.00111424	0.0107347	0.00333606	0.0187955	0.00389157		0.000336639	0.00225473	0.00194204	0.0155976	0.00278065		0.00206905	0.0017242	0.00853818	0.00120589		0.0120452	0.021542		0.0104182	0.00260538	0.00888943	0.00507598	0.0136168
bec2	0.00039472	0.000727701	0.000943321	0.00315787	0.00131678		0.00119937	0.00520594	0.00153894	0.00783008	0.00232669		0.000207564	0.00243494	0.00137212	0.00909682	0.00403379		0.000736558	0.000383977	0.00645252	0.00266191		0.0204949	0.0134748		0.00283022	0.000937644	0.00408644	0.00130316	0.00581394
be-ch32	0.00536937	0.00366392	0.00130006	0.0104769	0.00581647		0.00582157	0.00484992	0.00342476	0.0129847	0.00494178		0.01253	0.00300956	0.00449886	0.0119879	0.00627852		0.00391385	0.00330389	0.00943389	0.00423392		0.0190569	0.00963604		0.00466189	0.00373791	0.00802951	0.00484735	0.021744
bef2	0.000282008	0.00108232	0.000623561	0.000480626	0.00268156		0.00265348	0.00417753	0.000108692	0.00599717	0.0106117		0.000831403	0.00222383	0.000157513	0.0200861	0.000181332		0.00103192	0.0027394	0.00310179	0.00678784		0.00430408	0.0217321		0.00310502	0.00104309	0.00123814	0.000674387	0.0164214
beh2	3.51094e-05	0.000259646	0.000439275	0.00141091	0.000169831		0.000317617	0.0050982	0.000550319	0.00597839	0.00282426		0.000484999	0.00128598	0.000571548	0.00769221	0.00183059		0.00116922	0.000429477	0.00388489	0.00123699		0.00525089	0.0118343		0.0056212	0.00186632	0.00416862	0.00227267	0.00794856
benzene	0.00271387	0.00409135	0.0038844	0.0147242	0.0101668		0.00335769	0.00508196	0.00459782	0.0196248	0.0111365		0.00302492	0.00396201	0.00392156	0.0190098	0.0126201		0.00377381	0.00368009	0.0133511	0.00883434		0.0309755	0.0132907		0.00888696	0.0041296	0.0128883	0.00417776	0.0203959
beo	0.000251	0.000186	0.00026	0.000105	0.001146		0.001401	0.003699	0.0008565	0.009629	0.002927		0.000324	0.001825	0.000137	0.009471	0.000164		0.000475	0.001205	0.004482	0.0005375		0.003908	0.010157		0.00198275	0.00227336	0.00176823	0.00200865	0.00360241
beoh	0.00863838	0.0159798	0.0157793	0.0421431	0.0217516		0.00304111	0.0222917	0.0143085	0.0487172	0.0532113		0.0171964	0.0416132	0.0400505	0.0921648	0.0795267		0.0166424	0.0190893	0.0713417	0.0500712		0.0170703	0.324577		0.0363453	0.0144564	0.0514117	0.0142456	0.094195
berylliumhydride	0.0001305	0.000298	0.000358	0.002865	0.001058		0.0003275	0.004043	0.000508	0.005622	0.0013105		3e-05	0.001404	0.000464	0.007782	0.001124		0.000893	0.00043	0.004714	0.00033		0.0032015	0.007109		0.00258596	0.00246652	0.00170997	0.00295077	0.00625914
bf	4.4e-05	0.000758	0.00054	0.008621	0.001699		0.000455	0.0020565	0.001744	0.000706	0.001082		0.000137	0.00165	0.001035	0.010312	0.004777		0.000548	0.001083	0.006274	0.0017635		0.011539	0.027376		0.00533066	0.00159267	0.0121218	0.00166604	0.00597252
bh	7.5e-05	0.001393	0.00078	0.009925	0.0039925		0.000352	0.001267	0.000873	0.009881	0.003977		0.000227	0.001205	0.001379	0.013728	0.005829		0.001767	0.001677	0.008358	0.004433		0.007382	0.007529		0.00303314	0.00163097	0.00680853	0.000755089	0.0069098
bh3	0.000102118	0.00106927	0.00045873	0.0115483	0.00299275		0.000226427	0.00242063	0.00173026	0.0164949	0.00536645		9.78104e-05	0.000865618	0.000838376	0.0162406	0.00426173		0.00102412	0.000538707	0.00568429	0.00101894		0.00844794	0.0143305		0.000843067	0.000376489	0.00644095	0.000895677	0.0128985
bicyclobutane	0.010302	0.0115359	0.0110189	0.0186214	0.0151275		0.0102383	0.0125395	0.0121787	0.022551	0.0158878		0.0105361	0.0112761	0.0113966	0.0217236	0.0182807		0.0117582	0.011805	0.0185682	0.016003		0.0338925	0.029848		0.0143047	0.0122702	0.0172917	0.0123814	0.0346333
BN	1.3e-05	0.000317	0.000167	0.003858	0.000861		0.000101	0.00087	0.000501	0.002384	0.000128		8.3e-05	0.001513	0.000917	0.005547	0.001388		0.00064	0.000104	0.004824	0.001389		0.010354	0.008864		7.55788e-05	0.0010785	0.00326457	0.00103583	0.00155827
bo	3.75e-05	0.000426	0.0002445	0.003954	0.000442		0.000177	0.001127	0.000722	0.001744	0.000764		2.45e-05	0.0015625	0.000974	0.004315	0.000618		0.000324	0.000128	0.00477	0.001111		0.008866	0.007608		0.00178533	0.00061428	0.0055921	0.000804076	0.00429644
Boranamine	0.000961808	0.00170935	0.00138862	0.0100959	0.00316438		0.00107731	0.0028672	0.00224928	0.0132541	0.00382966		0.000815163	0.00195299	0.00172904	0.0121979	0.00416597		0.0014287	0.00117268	0.00630805	0.00240479		0.0151856	0.0116487		0.00339206	0.00140258	0.00857698	0.00171999	0.0139449
borazine	0.00184903	0.00317023	0.00290852	0.0114233	0.0051807		0.00280736	0.00464391	0.00419418	0.0137553	0.00470366		0.0022976	0.00432645	0.00418928	0.0135437	0.00753796		0.00316114	0.00295837	0.00869661	0.00466057		0.0209502	0.0103239		0.00597171	0.0026944	0.0112365	0.00298505	0.017464
boric-acid	0.00208613	0.00215714	0.00284846	0.00880042	0.00444851		0.00247047	0.0034772	0.00287209	0.00790293	0.0102832		0.00149906	0.00243043	0.0022515	0.0123065	0.0105265		0.00473121	0.00461839	0.0120838	0.00942745		0.0120217	0.0285982		0.00414635	0.00445202	0.00856242	0.00463733	0.0209396
boron-trioxide	0.00280555	0.00860946	0.00695435	0.0448584	0.0243963		0.00924332	0.00257552	0.0154418	0.244225	0.0190787		0.00703178	0.00689883	0.00361024	0.0257442	0.0409304		0.0132351	0.011521	0.00785499	0.0211074		0.0506001	0.276515		0.042804	0.00504831	0.0407736	0.00465598	0.084757
c2	1e-05	0.000345	0.000177	0.004828	0.002247		0.000117	0.000695	0.000463	0.007049	0.002622		6.4e-05	0.000594	0.000249	0.008045	0.004904		8.6e-05	0.000147	0.005483	0.001715		0.025787	0.008585		0.00237217	0.000665043	0.00422449	0.000725246	0.00229393
c2h3_rad	0.000743417	0.00165068	0.00148149	0.0106519	0.0046714		0.000789884	0.00221259	0.00174873	0.0144513	0.00591246		0.00083171	0.00127239	0.00125601	0.013972	0.00750917		0.00193117	0.0014276	0.00828386	0.00519939		0.0231893	0.0126091		0.00376384	0.00101249	0.00828139	0.00136539	0.0186061
c2h5_rad	0.00415527	0.00475551	0.00469342	0.0124812	0.00777131		0.00436102	0.00524615	0.00503734	0.0162134	0.00897789		0.00438297	0.00491402	0.00486957	0.0160595	0.0102654		0.00518547	0.00525347	0.0107498	0.00783704		0.0216911	0.0145289		0.00724108	0.00497089	0.0103588	0.00495186	0.0381331
carbondioxide	9.20283e-05	0.000509415	0.000475851	0.00556318	0.00287024		0.0001196	0.000724258	0.000654933	0.00384394	0.00108926		0.000140871	0.0012091	0.000992404	0.00765742	0.0040149		0.000320001	0.000145368	0.00915839	0.00507586		0.0156347	0.018499		0.00405757	0.00107382	0.00843685	0.00128011	0.00178638
carbonicdifluoride	0.000586514	0.00147613	0.00135601	0.00507309	0.0040539		0.000804157	0.00120603	0.00138442	0.00239746	0.000798781		0.000553295	0.00111526	0.0009789	0.00577355	0.00540803		0.00165389	0.00148613	0.00604935	0.00513957		0.011591	0.0333142		0.0074988	0.0020627	0.00890709	0.00215451	0.00732629
carbonmonoxide	8e-06	0.000627	0.000442	0.005089	0.002518		7.2e-05	0.000589	0.000506	0.003647	0.000803		6.8e-05	0.001299	0.000901	0.005862	0.002242		0.000521	0.000133	0.007401	0.003717		0.013092	0.012015		0.00371432	0.000946236	0.00711392	0.00113655	0.00164524
carbontetrafluoride	0.00149532	0.00249165	0.00241326	0.00478338	0.00433817		0.00189756	0.00220789	0.0024986	0.00187149	0.00017413		0.0014807	0.00167751	0.00160051	0.00452459	0.00611677		0.00130445	0.00113177	0.0038565	0.00535431		0.00991247	0.0357084		0.0081808	0.00308817	0.00928825	0.00314507	0.00446199
cch_rad	0.000307929	0.000729733	0.000428414	0.00864999	0.00247277		0.000332391	0.00135267	0.000798079	0.011676	0.00170187		0.00033317	0.000524518	0.000526734	0.0112072	0.00505892		0.000362024	0.000430177	0.00674208	0.00153711		0.0252083	0.00931902		0.00136923	0.000343715	0.00634153	0.000398576	0.00512639
ch_rad	5.4e-05	0.00109	0.000728	0.008823	0.004404		0.000209	0.001283	0.000938	0.008066	0.00356		0.000405	0.001419	0.001438	0.011428	0.006713		0.001582	0.001556	0.007132	0.0052645		0.007643	0.010781		0.00412509	8.88094e-05	0.00725678	0.000426849	0.0095674
ch3ch2o_rad	0.00641668	0.00685627	0.00665258	0.0128816	0.00997504		0.00642951	0.00708733	0.006898	0.0152807	0.0100006		0.00595761	0.00665367	0.00646588	0.016039	0.0120408		0.00668217	0.00659922	0.0122127	0.0100657		0.0223854	0.0264593		0.0108819	0.00769428	0.0127639	0.00750252	0.0800943
ch3co_rad	0.00405309	0.00910942	0.00564421	0.0096747	0.00782203		0.0125219	0.00425045	0.00293407	0.011724	0.00786341		0.0123495	0.00314958	0.00361535	0.0132817	0.00955702		0.0138385	0.00440328	0.0114964	0.0108037		0.0238111	0.0153495		0.00734011	0.00264133	0.00905758	0.00257198	0.0219959
ch3o_rad	0.000993007	0.00175932	0.00158373	0.0089583	0.00565931		0.00107793	0.00272964	0.00253632	0.0132447	0.00760262		0.00182492	0.00317165	0.00313596	0.0134856	0.00839623		0.00447825	0.00441086	0.00886115	0.00701996		0.014248	0.0212472		0.0059163	0.00188462	0.00838774	0.0019525	0.0167341
cyano_rad	2e-06	0.00051	0.000351	0.005041	0.002695		0.000137	0.000661	0.000457	0.005199	0.001765		7.5e-05	0.000837	0.000494	0.007264	0.003817		0.000307	0.00011	0.006622	0.002997		0.014726	0.009317		0.00207832	9.73819e-05	0.0046408	0.000225913	0.000183523
cyanogen	0.000845563	0.00111654	0.000970939	0.00958324	0.00435942		0.000851895	0.001523	0.00136854	0.0117457	0.00218361		0.000790048	0.00117719	0.00137538	0.0133241	0.00720722		0.000988998	0.000942991	0.0116004	0.00509728		0.0326144	0.00751983		0.0030727	0.000961175	0.00879773	0.00101607	0.00450475
cyclobutane	0.018321	0.00876642	0.0095148	0.0152336	0.0153736		0.0128036	0.0125237	0.00878225	0.0240896	0.0156295		0.00922272	0.012584	0.010407	0.0188104	0.0162992		0.0116966	0.014905	0.0266754	0.0154086		0.0462655	0.096477		0.0127409	0.00914233	0.0147097	0.00851465	0.0305404
cyclobutene	0.00366859	0.00479232	0.00487505	0.0128826	0.00872856		0.00468666	0.00549438	0.00524886	0.0161662	0.00936018		0.00401205	0.00506575	0.00513871	0.0168474	0.0115336		0.00674142	0.00514672	0.011019	0.00809034		0.0249422	0.0169725		0.00800027	0.00541535	0.0113963	0.00531031	0.0272234
cyclopropane	0.00210614	0.00361491	0.00340218	0.0132702	0.00804642		0.00258369	0.00450654	0.00411124	0.016828	0.00892178		0.00242253	0.00350301	0.00351155	0.0162922	0.00995815		0.00371119	0.00365702	0.0110839	0.00716696		0.0220763	0.0180085		0.00703956	0.00390485	0.0113768	0.00416141	0.0236385
cyclopropene	0.00134433	0.00172097	0.0016147	0.0116429	0.00562926		0.00137626	0.002601	0.00222323	0.0156641	0.00616366		0.00120016	0.00184297	0.00195199	0.0159013	0.00850156		0.00188268	0.00172244	0.00925338	0.00484225		0.025437	0.016216		0.0045676	0.00214675	0.00930851	0.00213088	0.0189393
difluorinemonoxide	0.000847537	0.0038056	0.00323291	0.014671	0.0117305		0.00183157	0.00248181	0.00259372	0.00188389	0.00225312		0.00177287	0.00318794	0.0026686	0.00837057	0.00962784		0.000581762	0.000673075	0.00631321	0.00835694		0.00649782	0.0465472		0.0126799	0.00308141	0.0131159	0.00356947	0.0114896
difluoromethane	0.00099068	0.00185138	0.0015799	0.00646375	0.00406161		0.00109843	0.00207363	0.00184969	0.0110957	0.00520315		0.0010232	0.00183534	0.00187221	0.0102345	0.00635204		0.00412738	0.00403026	0.007699	0.00620392		0.0111202	0.0245046		0.00645226	0.00244043	0.00808771	0.0024682	0.0126321
dimethylamine	0.00866767	0.0121194	0.0120642	0.0216611	0.0175765		0.0105605	0.0121151	0.0117376	0.0262778	0.0182396		0.0116126	0.012629	0.0122988	0.020666	0.0170297		0.0132783	0.0134335	0.0166081	0.0148784		0.0227625	0.0479319		0.0180452	0.0138602	0.0217481	0.0140039	0.0449469
dimethylether	0.0124712	0.014812	0.0146051	0.0224165	0.0184612		0.0138665	0.0156693	0.0157239	0.0259827	0.0190861		0.0155622	0.0159181	0.0156125	0.0203849	0.0186654		0.0161077	0.0160387	0.0182433	0.0174132		0.0246162	0.047335		0.0193828	0.0167186	0.0225784	0.0167492	0.0295211
ethane	0.00358417	0.00429902	0.00424127	0.0118114	0.00769965		0.00364191	0.00493796	0.00462548	0.0155807	0.00869672		0.00357986	0.00439308	0.00447629	0.0158033	0.00976992		0.00452409	0.00446345	0.00944356	0.00628103		0.0196484	0.0147372		0.0071656	0.00458035	0.0102741	0.00454169	0.0219272
ethanedial	0.00539968	0.00759419	0.00483934	0.0105892	0.00853788		0.00986873	0.0054892	0.0122468	0.0122282	0.0101323		0.00117608	0.0071772	0.00785073	0.0126497	0.0102604		0.00459318	0.00573318	0.0122989	0.00660104		0.0217945	0.0169921		0.00819763	0.00630656	0.00960441	0.00629713	0.0240781
ethanol	0.00509052	0.00608104	0.00629369	0.0116364	0.00903659		0.00637105	0.00639259	0.00612189	0.014417	0.0101302		0.0060918	0.0055995	0.00545459	0.0157925	0.0115094		0.00650816	0.00652158	0.0107722	0.00884627		0.0214877	0.0200623		0.00960112	0.00700462	0.0118157	0.00695498	0.0240161
ethylamine	0.00995917	0.0105379	0.0105893	0.0131334	0.0111062		0.00841211	0.00837418	0.00839835	0.015064	0.0112099		0.00711513	0.00718484	0.00712635	0.0189854	0.0129856		0.0070605	0.00683484	0.0129667	0.0109495		0.0213452	0.0260584		0.0165298	0.0131345	0.0162417	0.0124772	0.0354655
ethylene	0.00091575	0.00174605	0.00155637	0.0109572	0.00521812		0.00108952	0.0026278	0.00212011	0.0148264	0.0062728		0.000992913	0.0015745	0.00148911	0.0142551	0.00753325		0.00145185	0.00140539	0.0085309	0.00408881		0.0212332	0.0122883		0.00382615	0.00144112	0.00843249	0.0017497	0.014509
ethyleneoxide	0.00209082	0.00323817	0.00316115	0.0117749	0.00755638		0.00229341	0.00398916	0.00372486	0.0167709	0.0094713		0.00238801	0.00349434	0.00361322	0.0151505	0.00985252		0.00415361	0.00420511	0.0109197	0.0080367		0.0193737	0.0272985		0.00696095	0.00342927	0.0102201	0.00365443	0.0216472
f2	0.000283	0.002391	0.002006	0.010046	0.007391		0.000829	0.000471	0.000495	0.001788	0.000463		0.000549	0.000578	8e-06	0.00556	0.007327		0.001394	0.002221	0.002838	0.004767		0.002885	0.029393		0.00850556	0.00149892	0.00859633	0.00154471	0.00834004
fluoro-ethene	0.00108079	0.00219804	0.0019929	0.00981325	0.00557313		0.00134213	0.0026521	0.0023585	0.0128355	0.00606026		0.00116909	0.00195941	0.00189658	0.0125117	0.00752389		0.00346311	0.00318693	0.00787235	0.00512635		0.0218439	0.0197117		0.00633515	0.00245223	0.00946586	0.00263053	0.0132556
formaldehyde	0.000342027	0.00113593	0.0010045	0.00907704	0.0050371		0.00049103	0.00201508	0.0017723	0.0124997	0.00686617		0.00101881	0.00251429	0.00243903	0.0127277	0.00789264		0.00385353	0.0037523	0.00871951	0.00636486		0.0117884	0.0136056		0.00457943	0.00106739	0.00736223	0.00111368	0.0168433
formicacid	0.00195832	0.00277416	0.00269331	0.00722043	0.00434187		0.00205904	0.00260958	0.00251309	0.00849618	0.00538872		0.00138329	0.00195417	0.00198354	0.0112854	0.00758928		0.00287763	0.00298613	0.00812688	0.00589954		0.0134703	0.0260395		0.00646424	0.00343262	0.00845039	0.00346309	0.0265539
furan	0.00238755	0.00345654	0.00325978	0.0118831	0.00751832		0.00285576	0.0040497	0.00383385	0.0153763	0.00812791		0.00253366	0.00333883	0.00330971	0.0155501	0.00982165		0.00296296	0.00275028	0.00990645	0.0068845		0.0256519	0.0229557		0.00741089	0.00377654	0.0107326	0.00393438	0.0184188
h2	1.1e-05	0.001118	0.000165	0.007938	0.001027		5.4e-05	0.001164	0.000969	0.01049	0.001365		0.00012	0.000625	0.000416	0.010962	0.001585		0.000561	0.000392	0.000841	0.000101		0.003467	0.01049		0.00044462	3.60943e-05	0.00426555	0.00229414	0.00620909
h2coh_rad	0.00122994	0.003048	0.00313642	0.0185229	0.0144046		0.00172564	0.00468571	0.00532976	0.0174297	0.0166693		0.00339994	0.00738525	0.00585412	0.0189551	0.015776		0.00927169	0.0091834	0.0232199	0.0222765		0.0184161	0.0225381		0.0142803	0.00413066	0.016237	0.00403767	0.0462986
hco_rad	0.000387509	0.000884454	0.000745935	0.00789495	0.00479083		0.00038381	0.00159788	0.00135996	0.00925615	0.00451662		0.000747691	0.00167304	0.00179281	0.0106362	0.00618052		0.00220168	0.0019475	0.0072001	0.00508885		0.0115566	0.0148945		0.00409707	0.00139223	0.00684279	0.00157122	0.0130745
hydrazine	0.0017778	0.0048898	0.00419173	0.012289	0.00515066		0.00340058	0.00228425	0.00265515	0.0126631	0.00955603		0.00391598	0.00800368	0.00841243	0.0281141	0.0159707		0.0128562	0.0126095	0.0114768	0.0107048		0.0167754	0.0291654		0.0146426	0.00801695	0.0149273	0.00803605	0.0594097
hydrogencyanide	0.000312489	0.00077205	0.000520276	0.0086134	0.00272388		0.000372944	0.00119828	0.000867906	0.0102896	0.00190792		0.000369845	0.000649992	0.000895068	0.0103913	0.00455981		0.000411004	0.000379239	0.00728041	0.00296115		0.0149261	0.00893983		0.00147117	0.000425413	0.00658034	0.000646463	0.00553283
hydrogenfluoride	1.5e-05	1.3e-05	9e-06	0.004367	6.6e-05		0.000136	0.001267	0.000808	0.001528	0.001721		0.000363	0.000114	0.000177	0.00285	0.000657		0.000993	0.000817	0.001819	0.001244		0.00548	0.004476		0.00196978	0.000474107	0.00645603	0.00150728	0.0125739
hydrogenperoxide	0.00612856	0.0185881	0.0181383	0.0305247	0.0314938		0.00753927	0.0206129	0.0186474	0.0404197	0.0384289		0.00435592	0.0093334	0.00820727	0.0229189	0.0274293		0.00511999	0.00490399	0.0219557	0.0265549		0.0145887	0.185423		0.0293219	0.0173604	0.0268087	0.0186577	0.0429039
isobutane	0.0150968	0.0177807	0.0176472	0.0257708	0.0228874		0.0162992	0.0187117	0.0181604	0.0279315	0.0229667		0.0145719	0.0187715	0.0184247	0.0263555	0.0238042		0.0186117	0.018815	0.0234918	0.0204922		0.0341408	0.0275883		0.0212326	0.0184428	0.0234603	0.0184657	0.0323325
isopropanol	0.0174756	0.0210226	0.0205977	0.0307104	0.0291698		0.0194038	0.020348	0.0197885	0.0284307	0.0266119		0.0201034	0.0223316	0.0223616	0.0286429	0.0277539		0.0253121	0.0260944	0.0250931	0.0253388		0.0327091	0.0377374		0.0303986	0.0219315	0.030183	0.0217965	0.062105
isopropyl_rad	0.0221417	0.0174068	0.031262	0.0624612	0.0355536		0.0172827	0.0364137	0.0380327	0.0643249	0.0526944		0.0409456	0.0382796	0.0366222	0.0706356	0.0573095		0.0545225	0.0428014	0.0879107	0.0801912		0.0483256	0.0573236		0.0251972	0.0235186	0.0451483	0.0235652	0.103993
ketene	0.00155056	0.00201178	0.00190168	0.0102457	0.00506729		0.00157905	0.00252722	0.00224515	0.0129827	0.00456766		0.00151043	0.00207743	0.00196982	0.0132959	0.00701405		0.00174522	0.00161687	0.0102952	0.00536927		0.0257434	0.0157523		0.00486814	0.00211593	0.00985836	0.00220614	0.0109867
li2	4.7e-05	0.002922	0.000105	0.006106	0.001214		0.0006	0.00805	0.008023	0.02288	0.004072		0.008245	0.002384	0.000185	0.001885	0.000245		0.002623	0.000754	0.010783	0.003801		0.078895	0.072709		0.000355257	0.000231197	0.000355729	0.000246824	0.000413677
li2c2	0.00129946	0.00152725	0.00147427	0.00453221	0.00203628		0.00210549	0.00228111	0.00216567	0.00449676	0.00853347		0.00140675	0.00156913	0.00156175	0.025074	0.00458798		0.00259975	0.00296125	0.015164	0.00284904		0.0261442	0.0346083		0.00621465	0.00361403	0.00479264	0.00333204	0.0161879
li2nh	0.00130594	0.00583242	0.0124883	0.0182021	0.0238682		0.00776689	0.00892928	0.00718705	0.01301	0.0204084		0.013618	0.0150995	0.00617135	0.0502194	0.0205251		0.0142286	0.0115411	0.0246119	0.0045439		0.0290065	0.0409767		0.0456899	0.0129327	0.0475345	0.0133181	0.038837
li2o	0.00305497	0.0049932	0.00666047	0.00403917	0.00682145		0.0040664	0.00389833	0.00376205	0.0105623	0.014816		0.00352982	0.00464083	0.00381629	0.0214573	0.00630075		0.00447026	0.00370777	0.0158303	0.00388884		0.0117569	0.0342977		0.0177786	0.00726016	0.0177087	0.00559241	0.0404831
li2o2	0.00164548	0.00334431	0.00379893	0.0130197	0.0104652		0.00317246	0.00478158	0.00461284	0.00622465	0.0119197		0.00420871	0.00380308	0.00242387	0.0174254	0.00985893		0.00283486	0.00288017	0.0119108	0.0132226		0.0109687	0.0450369		0.0120637	0.00334024	0.0122692	0.00330288	0.032099
lich3	0.0013275	0.00385776	0.00171256	0.0141742	0.00648014		0.00198462	0.00443177	0.00417758	0.0148973	0.00475026		0.00132338	0.00208887	0.00207474	0.0135187	0.00615954		0.00201896	0.00138577	0.00623656	0.00173337		0.0160636	0.0266023		0.00316394	0.00118303	0.00690363	0.00164478	0.0129137
linh2	0.000373635	0.000792925	0.00255579	0.0055118	0.00558645		0.000819588	0.0015581	0.00154554	0.00737803	0.0104437		0.00191534	0.00283068	0.00358019	0.00914972	0.00517263		0.00513799	0.00602765	0.00598103	0.006571		0.0138403	0.0221966		0.0101802	0.00355693	0.00869277	0.00305075	0.0216436
lioh	1.78187e-05	0.0019473	0.00262636	0.00762655	0.00856963		0.000656088	0.00210745	0.00242412	0.0136039	0.0165709		0.00192474	0.00100147	0.0033895	0.00635667	0.00789054		0.00465779	0.00761948	0.00389302	0.0095046		0.00782765	0.0197151		0.0104466	0.00364917	0.00977257	0.0022733	0.0288677
lithiumfluoride	7.9e-05	0.000154	0.002813	0.007703	0.008909		0.002095	0.001309	0.001633	0.02017	0.020231		0.00151	0.002154	0.001721	0.001599	0.008949		0.003158	0.006761	0.007815	0.015402		0.05073	0.016272		0.0094738	0.00413791	0.00940781	0.00267979	0.037035
lithiumhydride	7e-05	0.000361	5.7e-05	0.000527	0.00055		0.00045	0.000845	0.000798	0.0005225	0.0027455		0.000129	0.00019	8.9e-05	0.006895	0.000298		0.000889	3.5e-05	0.012503	0.002211		0.011844	0.01814		0.002676	0.00168027	0.00275051	0.00167689	0.000440922
methane	0.00137276	0.00232393	0.00192166	0.0100002	0.00460898		0.00157515	0.00327203	0.00280262	0.0130877	0.00535879		0.00143381	0.00228313	0.00204043	0.0135075	0.00628211		0.00223821	0.0019738	0.00623563	0.00353229		0.011932	0.0113077		0.00407533	0.00213405	0.00830455	0.002392	0.0146481
methoxy-ethane	0.0149312	0.0186373	0.0176981	0.0266626	0.0241824		0.0156649	0.0235211	0.0200718	0.0296799	0.0266155		0.0218948	0.0198091	0.0215556	0.0264453	0.0272428		0.0226534	0.0271886	0.0234734	0.0230849		0.0315855	0.0486209		0.0238557	0.019722	0.0259846	0.0196086	0.0257608
methyl_rad	0.000223655	0.000893018	0.000521219	0.00978426	0.00330863		0.000286737	0.00165357	0.00129255	0.0126993	0.0040948		0.000261571	0.000912106	0.000694796	0.0125287	0.00502553		0.000831363	0.000456094	0.00491603	0.00224183		0.0102929	0.0118246		0.00217177	0.000372022	0.00700088	0.0010893	0.0123796
methylalcohol	0.00391045	0.00491175	0.00476122	0.00998727	0.00723021		0.00445329	0.00539301	0.00523712	0.0134956	0.00981223		0.00552801	0.00579248	0.00587803	0.0137137	0.00984919		0.00672233	0.00684518	0.00960046	0.00838697		0.0138854	0.019212		0.00770277	0.00536558	0.00987525	0.00549704	0.0255909
methylamine	0.00229987	0.00339956	0.00327849	0.00993096	0.00604314		0.00242037	0.00346136	0.00325637	0.0127003	0.00919257		0.00290913	0.00500084	0.00532338	0.016622	0.011373		0.00698915	0.00735582	0.01027	0.00887498		0.0153353	0.0238569		0.00915305	0.00529378	0.0107421	0.00530161	0.0430143
methylene_singlet	0.000219472	0.00154456	0.00155935	0.00907771	0.0050614		0.000442794	0.00185535	0.00182572	0.0131705	0.0110842		0.00119311	0.00271147	0.00275535	0.0141384	0.00822606		0.0050814	0.00514924	0.0128253	0.0104865		0.00918721	0.0145134		0.00395142	0.00118375	0.00694197	0.00122706	0.0206109
methylene_triplet	2.85229e-05	0.000787587	0.000325159	0.00879126	0.00307849		0.000183305	0.00145663	0.00102711	0.0108535	0.00361033		0.000206734	0.00176322	0.00150011	0.0109349	0.00523384		0.00385681	0.00363707	0.00838191	0.00706026		0.00867007	0.0100605		0.00416337	0.00204187	0.00630606	0.00168349	0.0252189
methylenecyclopropane	0.00274159	0.00380439	0.00366417	0.0137674	0.00862022		0.00295811	0.00474726	0.00431145	0.0182656	0.00928966		0.00298779	0.00393749	0.00400611	0.017967	0.0117722		0.00390662	0.00382509	0.0136832	0.00845758		0.0284668	0.0174741		0.0078167	0.00403871	0.0121829	0.00424304	0.022518
methylformate	0.0162969	0.0185082	0.0202878	0.0257044	0.0216281		0.0295509	0.0317655	0.0383935	0.0198988	0.00891818		0.0358718	0.0421426	0.0214116	0.0228309	0.0351144		0.00706867	0.0223964	0.0251492	0.00677974		0.0276442	0.0428603		0.0232042	0.0221883	0.0250359	0.0220236	0.0530792
methylnitrite	0.0404045	0.0369925	0.0373574	0.0393582	0.0366952		0.0473494	0.0108832	0.0312803	0.0528535	0.0507604		0.0257195	0.0230448	0.0445133	0.0412141	0.0112388		0.0465612	0.044195	0.0436508	0.0186931		0.039633	0.0555528		0.0393453	0.0380687	0.0400799	0.038309	0.0606395
n2	1e-05	0.000577	0.000524	0.006029	0.004483		0.000104	0.000588	0.000397	0.005529	0.002628		0.0002	0.000702	0.000528	0.007666	0.005119		0.000515	0.000436	0.008092	0.005091		0.016578	0.012314		0.00273414	0.000229259	0.00557162	0.000529416	0.0003916
nh_rad	8e-06	0.000651	0.0005045	0.007113	0.003302		5.5e-05	0.001518	0.001304	0.006677	0.0024865		0.000249	0.001067	0.0011365	0.008995	0.004877		0.000874	0.001234	0.005014	0.003938		0.006879	0.010851		0.00243112	0.000385814	0.00625471	6.67638e-05	0.00963117
nh2_rad	0.000301288	0.000828016	0.000672097	0.00825462	0.00357601		0.000262915	0.00187661	0.00165091	0.0129089	0.0101393		0.00143652	0.00351354	0.00350659	0.0140555	0.00871424		0.00590428	0.00586838	0.00833962	0.0068202		0.00938004	0.0150605		0.00473736	0.000724245	0.0071793	0.000917908	0.0187704
nitricoxide	0.000118	0.000941	0.000952	0.0056885	0.005022		0.000259	0.000671	0.000775	0.002459	0.002173		0.000446	0.001142	0.001129	0.005643	0.004458		0.001119	0.001131	0.007568	0.006424		0.015454	0.020449		0.00546355	0.000953009	0.00744605	0.000902842	0.00297209
nitrogentrifluoride	0.0013638	0.00355703	0.00324087	0.0108728	0.00978863		0.00215469	0.00286675	0.00294671	0.00637259	0.00153322		0.00185832	0.0033244	0.00288843	0.00625493	0.00785857		0.000331604	0.000372457	0.00435209	0.00735679		0.011945	0.0529555		0.0119917	0.00352092	0.0127186	0.00416881	0.0108431
nitro-methane	0.0111103	0.0144907	0.00400479	0.00904679	0.0073685		0.00343359	0.0280876	0.00491645	0.010908	0.0086074		0.00330985	0.00449247	0.00519037	0.0120485	0.00889532		0.00526321	0.0063086	0.0108915	0.008075		0.0193846	0.0257314		0.00914183	0.00422467	0.0104029	0.0040942	0.0256229
nitrousoxide	0.00027259	0.00107246	0.00101112	0.00799052	0.00689627		0.000313889	0.000547152	0.000630547	0.00483111	0.00272649		0.000350332	0.00107092	0.000901793	0.00861804	0.00651668		0.000818207	0.000763827	0.0104666	0.00795592		0.0235535	0.0302829		0.00594295	0.000733282	0.00995691	0.000706792	0.0014893
no2	0.000469846	0.00192728	0.00191869	0.00775271	0.00755172		0.00072352	0.000985326	0.00112993	0.00235428	0.00373811		0.000804408	0.00205597	0.00223909	0.00747715	0.00682058		0.00219007	0.00226497	0.0100089	0.00913777		0.0192152	0.0341892		0.00858795	0.00149578	0.0101844	0.00131701	0.00552481
o2	0.000234	0.001591	0.001545	0.006206	0.006307		0.000477	0.000664	0.000794	0.001788	0.000824		0.00059	0.001712	0.001877	0.003262	0.00401		0.000872	0.001047	0.00549	0.006222		0.011635	0.026134		0.0081005	0.00147921	0.00872998	0.00130855	0.00394682
oh_rad	4.7e-05	0.000265	0.000254	0.005421	0.001605		5.2e-05	0.0016255	0.0012435	0.004221	0.000394		3.8e-05	0.00053	0.000636	0.005733	0.001851		7e-06	0.000298	0.003508	0.002519		0.00558	0.008196		0.0022606	0.000388693	0.00632192	0.00103141	0.0117251
ozone	0.000655558	0.00293627	0.00268099	0.00963823	0.00962926		0.00121627	0.00185893	0.00185633	0.00153525	0.00330006		0.00136945	0.0040822	0.00409278	0.00642915	0.00796742		0.00233567	0.00244124	0.00839782	0.0099247		0.0157012	0.0521237		0.012453	0.00259455	0.0129751	0.00259367	0.0124264
propane	0.0121005	0.0134699	0.0135145	0.0218974	0.0182767		0.0120062	0.0143829	0.0137116	0.0238932	0.0183144		0.0112357	0.0138187	0.0140069	0.0220893	0.0187763		0.0145802	0.014399	0.0177122	0.0152001		0.0282667	0.0229538		0.0164108	0.0140135	0.0190075	0.013988	0.0273757
propene	0.00842332	0.0102642	0.010255	0.0162207	0.0128059		0.00724532	0.00997747	0.0094177	0.0202146	0.0136544		0.0070218	0.0106407	0.0109368	0.0192277	0.0140018		0.00886572	0.0108517	0.0147077	0.0119992		0.0278642	0.0173617		0.0120412	0.0101593	0.0144283	0.0101406	0.0231569
propyne	0.00212854	0.00278234	0.00258601	0.0127361	0.00593989		0.00217417	0.00332914	0.00308368	0.017413	0.00561906		0.00227224	0.00288989	0.00291834	0.0173083	0.00948748		0.00279338	0.00267135	0.0116055	0.0058075		0.0311826	0.0128247		0.0054763	0.00267783	0.0113087	0.00270673	0.0191838
pyridine	0.00317558	0.00421524	0.00407733	0.0141288	0.0100009		0.00343623	0.00527994	0.00462768	0.0183698	0.0103375		0.00363666	0.00413743	0.00409649	0.0178885	0.0120789		0.00436503	0.00402083	0.012824	0.00892708		0.0274544	0.0166787		0.00886688	0.00428933	0.0125469	0.00433964	0.0187071
pyrrole	0.00235246	0.00350138	0.00331916	0.0118733	0.0076444		0.00285552	0.00398743	0.00376411	0.0156385	0.00814025		0.00289975	0.00347678	0.00334412	0.0155466	0.0100924		0.00313737	0.00305816	0.0102067	0.00688177		0.0248505	0.0151403		0.0072611	0.00343349	0.0108259	0.00346029	0.019045
spiropentane	0.0032198	0.00548005	0.00522132	0.0149588	0.0107241		0.00405901	0.00648439	0.00609196	0.0189254	0.0114019		0.00383321	0.00606913	0.00598279	0.019543	0.0138059		0.00579978	0.00558406	0.0153954	0.0108561		0.0296649	0.0183474		0.0103237	0.00589939	0.0139176	0.00606784	0.0279867
t-butyl_rad	0.0202239	0.0232466	0.024183	0.0287767	0.0261343		0.0203397	0.0228998	0.0246953	0.0339644	0.0272142		0.0240583	0.0252716	0.0254405	0.032191	0.0291818		0.0263444	0.0275819	0.0331506	0.0299828		0.0379993	0.0410495		0.0264119	0.0228521	0.0279126	0.0228382	0.0363176
tetrafluoroethylene	0.000777654	0.00209392	0.00194987	0.00693843	0.0061197		0.00114067	0.0018743	0.0020578	0.00407712	0.00303067		0.00111075	0.00187597	0.00169753	0.00751833	0.00730435		0.00173142	0.00156758	0.007671	0.008639		0.0205376	0.0324925		0.0086867	0.00243799	0.00988634	0.00235928	0.00872875
trans_butane	0.0193036	0.0215516	0.0214416	0.0291489	0.0275386		0.0197583	0.023094	0.022539	0.0315987	0.0279989		0.01905	0.0224877	0.0220427	0.0300562	0.0283073		0.0230149	0.0225995	0.0274687	0.0247702		0.0396252	0.0300876		0.0259277	0.0225317	0.027505	0.0221197	0.035601
trifluoro-acetonitrile	0.00257673	0.00281794	0.00277926	0.00612274	0.00456874		0.00250975	0.0027287	0.00280918	0.00630811	0.00308265		0.00229441	0.00245645	0.00258246	0.00770161	0.00615636		0.0027131	0.00264415	0.0066266	0.00582249		0.0225669	0.0291728		0.00726165	0.00303683	0.00899464	0.00308128	0.00895032
trifluoro-borane	0.000232632	0.000871766	0.00065388	0.00493271	0.000506601		0.000621209	0.00233962	0.0019875	0.000507595	0.00164516		0.000201283	0.00121128	0.000955691	0.00745495	0.00610872		0.00188391	0.00207317	0.00321997	0.000888201		0.00753122	0.0241981		0.00580692	0.00203161	0.00998595	0.00212071	0.00292348
trifluoro-methane	0.000981542	0.0018706	0.00168365	0.00482709	0.0035465		0.00121961	0.00182647	0.00180654	0.00673503	0.00258131		0.000893973	0.00098871	0.000885623	0.00711722	0.00559965		0.00208022	0.00189382	0.0034937	0.00396293		0.0101328	0.0289523		0.00692755	0.00239264	0.00826938	0.00242125	0.00821775
trimethylamine	0.0130122	0.0180553	0.0182682	0.0280604	0.0235179		0.0152604	0.0197775	0.019226	0.0364618	0.0253602		0.0181203	0.0202745	0.0200879	0.0237993	0.0226172		0.0199079	0.0201427	0.0232846	0.021694		0.0289687	0.0657575		0.0253061	0.0196187	0.0296477	0.0197484	0.045327
Trimethylborane	0.0208033	0.0203974	0.0151252	0.0195486	0.0134214		0.00812324	0.0182497	0.0172516	0.0235639	0.015306		0.0146325	0.0157464	0.0164349	0.0232106	0.0136731		0.0176078	0.0205286	0.0204346	0.0203882		0.0286384	0.0165573		0.0110975	0.0103395	0.0128281	0.0101803	0.213099
water	0.000411224	0.000836835	0.000916882	0.00638054	0.00121855		0.000123726	0.00233458	0.00178577	0.0109125	0.0082839		0.00124433	0.00311448	0.00309589	0.0121777	0.00774015		0.00674607	0.00682071	0.00686824	0.00563216		0.00863713	0.012934		0.00628779	0.00129417	0.00791147	0.00171293	0.020636
1-chloro-propane	0.0078139	0.00865276	0.00824465	0.0187158	0.0166164		0.00794607	0.00999234	0.0099227	0.0195918	0.0175768		0.00769868	0.0103139	0.0105298	0.018634	0.0170206		0.010564	0.010445	0.0144701	0.0124535		0.0324652	0.0384837		0.0148168	0.0103104	0.0170653	0.0101269	0.0241069
acetylchloride	0.005414	0.00397557	0.0039224	0.0116157	0.0104815		0.00283407	0.00484562	0.00385384	0.0107246	0.00653062		0.00324713	0.00533186	0.00544082	0.013781	0.0117487		0.00749184	0.00768596	0.0112018	0.0113281		0.0274395	0.0352793		0.00959102	0.00340843	0.010826	0.00343242	0.0245651
al2h6	0.00143086	0.00264868	0.00269573	0.0100312	0.00661443		0.00155874	0.00475975	0.00521408	0.0115779	0.00878791		0.00190822	0.00676377	0.00753527	0.0180984	0.012444		0.00386793	0.00350668	0.0116759	0.00522738		0.0160633	0.0125452		0.00616402	0.00101146	0.0150277	0.000926013	0.0159694
al2o3	0.000407192	0.0011887	0.000783474	0.0168787	0.0059895		0.0016883	0.00241829	0.00193395	0.013016	0.0114479		0.00594541	0.0121529	0.0123581	0.0424087	0.0339522		0.00295766	0.000945147	0.0164292	0.00805797		0.012661	0.0316365		0.0153555	0.00103052	0.0181751	0.00106937	0.0110938
al2	1.1e-05	0.001553	0.001464	0.007835	0.007222		4.2e-05	0.000571	0.000907	0.001992	0.004768		0.000262	0.002468	0.004326	0.010594	0.010487		0.0011067	0.0015597	0.007082	0.004331		0.014132	0.033515		0.00488005	0.00101757	0.0143673	0.000980444	0.000843914
Al3P3H6	0.00202504	0.0024579	0.0023728	0.0148576	0.0113461		0.00253375	0.00514112	0.00545902	0.0132833	0.0117968		0.00345777	0.0094337	0.0109366	0.0272422	0.0240743		0.00491059	0.0047985	0.016232	0.0106665		0.0253559	0.0198924		0.012717	0.00253821	0.0175416	0.0151629	0.00996859
alcl	7.6e-05	0.000292	0.000197	0.009137	0.007389		0.000699	0.001248	0.001356	0.002259	0.000455		0.002117	0.005959	0.006538	0.018921	0.019717		0.0033768	0.0036195	0.006963	0.005618		0.025097	0.056241		0.0108297	0.00134039	0.0198726	0.00126417	0.00578628
alh2ph2	0.00435668	0.0118928	0.0109739	0.0302622	0.0294381		0.00511328	0.00575044	0.00571234	0.0140371	0.0147181		0.00588298	0.0105729	0.0110136	0.0177639	0.0168501		0.00709925	0.00751654	0.0217858	0.0296199		0.0124059	0.0784351		0.0220937	0.00628724	0.00969337	0.00639433	0.0209944
alh3	0.00025289	0.000712638	0.000477974	0.00741569	0.00388787		0.000358961	0.00227726	0.00204683	0.00805113	0.00573288		0.000867118	0.00389262	0.00410322	0.0115843	0.00747307		0.00252212	0.00164259	0.00831948	0.00245506		0.0074818	0.00801386		0.00151813	0.00167232	0.00600317	0.00158224	0.0117636
alh	0.000329	0.001803	0.001691	0.006439	0.004008		0.00032	0.001768	0.001717	0.004758	0.003691		0.00044	0.003456	0.003743	0.010919	0.007957		0.0021896	0.0016343	0.006848	0.001518		0.008018	0.002991		0.00253717	0.00183097	0.0100131	0.00176681	0.00763104
al-ph2	0.0164133	0.0269496	0.0254739	0.0608381	0.064347		0.0151198	0.0164127	0.0139139	0.0333212	0.039354		0.0147249	0.0243226	0.0231884	0.0292683	0.0330488		0.0158884	0.0158145	0.0448775	0.0598807		0.0232364	0.142334		0.181543	0.0167238	0.0182427	0.0162779	0.0270487
al-sih3	0.0212741	0.0161184	0.0162321	0.0399252	0.026699		0.0190018	0.0122309	0.0122084	0.0259493	0.0363567		0.01723	0.0174979	0.0149697	0.0267096	0.021858		0.0130253	0.0167454	0.0200884	0.0148311		0.038984	0.0559419		0.0186007	0.0129987	0.0291559	0.0127344	0.0506957
als	8e-05	0.000372	0.000403	0.005679	0.004665		0.000352	0.001607	0.001409	0.002501	0.00368		0.0016	0.005034	0.005575	0.014022	0.012841		0.0027356	0.0027488	0.007468	0.004816		0.023361	0.034777		0.00667445	0.000989396	0.0122127	0.000954029	0.00151584
aluminumtrichloride	0.000364876	0.000806401	0.000724311	0.00981059	0.00828813		0.00114096	0.0028571	0.00303679	0.00925689	0.0122436		0.00363975	0.00932222	0.0101104	0.0279586	0.0269046		0.00320476	0.00362327	0.0110003	0.00819848		0.0320716	0.0712439		0.0120241	0.000416481	0.0175337	0.000416942	0.0145288
aluminumtrifluoride	5.2168e-05	0.000215023	0.000487587	0.0142256	0.00992967		0.00140079	0.00237755	0.000851089	0.00934433	0.0115502		0.00439703	0.0108262	0.0101544	0.0334603	0.0308928		0.00275848	0.00091426	0.00509665	0.00376494		0.0120916	0.0274824		0.0105803	0.0018033	0.0088705	0.00192415	0.00794686
becl2	0.000224537	0.00220127	0.00101001	0.00362688	0.0016183		0.00160768	0.00739501	0.00121576	0.00937338	0.00155624		0.000148602	0.00262095	0.00245031	0.0102258	0.00362769		0.000579059	0.000484917	0.00507044	0.000350277		0.0213024	0.0221017		0.000418267	0.000219449	0.000408211	0.000444947	0.00146568
besh	0.00216825	0.00716795	0.005418	0.0163052	0.0182995		0.00422588	0.0102262	0.00784875	0.0193442	0.0194811		0.00166564	0.00377048	0.00638424	0.0228389	0.0144044		0.00385893	0.00583402	0.0125089	0.00638823		0.0632073	0.0569117		0.0291323	0.00776338	0.0296593	0.0075755	0.0193072
besi2	0.000182026	0.00165943	0.00183282	0.00435737	0.00336038		0.00089931	0.00509744	0.00245084	0.0136522	0.00788114		0.00117758	0.00450231	0.00479976	0.0138462	0.0107732		0.00219532	0.0022279	0.00911333	0.00536861		0.021949	0.220957		0.00727477	0.00117814	0.0123746	0.00118034	0.00807159
bes	1.3e-05	0.000531	0.000195	0.00047	0.00027		0.000742	0.004814	0.000793	0.009315	0.000697		6e-05	0.002028	0.001638	0.00889	0.002921		0.0010999	0.0008285	0.007041	0.00134		0.017307	0.014083		0.000838312	0.00189451	0.000730119	0.00181514	0.00308256
C2H6O2S	0.00403909	0.00739814	0.0074884	0.0298613	0.0309149		0.00451231	0.00680637	0.00611541	0.029749	0.0320241		0.00904295	0.0153393	0.0157794	0.0351807	0.0354483		0.00907775	0.00895877	0.0250241	0.0245119		0.0692356	0.118147		0.0200277	0.00481437	0.0212581	0.00466136	0.0420531
C2H6Si	0.00229675	0.00405465	0.00372085	0.0166665	0.0123433		0.00235171	0.00575629	0.00505967	0.0190321	0.0131451		0.00312085	0.00749642	0.00773209	0.020756	0.0165673		0.00472189	0.00455563	0.0136577	0.00992041		0.0203004	0.0497971		0.0114473	0.0036396	0.0140735	0.00348368	0.0297949
carbondisulfide	0.000191877	0.0017718	0.00178486	0.0105279	0.010096		0.000324149	0.000547869	0.000776488	0.00813394	0.00767507		0.00212371	0.00440663	0.00483366	0.014679	0.0135		0.0022292	0.00196188	0.00960772	0.00719415		0.0382814	0.0270611		0.00664861	0.000396836	0.00787143	0.00034236	0.0114332
carbonmonosulfide	0.00024	0.001645	0.00165	0.008739	0.007973		0.000591	0.000749	0.000783	0.004698	0.004503		0.001733	0.003539	0.003842	0.011354	0.010143		0.0027529	0.0028558	0.00977	0.006619		0.02695	0.026328		0.00551395	0.000582071	0.00707773	0.000522102	0.00601237
carbontetrachloride	0.00100913	0.00426237	0.00410979	0.0154706	0.0156478		0.00118271	0.00203	0.00227971	0.00733739	0.00820952		0.00297894	0.00615912	0.00708061	0.0147851	0.0152109		0.00425947	0.00479275	0.0129441	0.0139366		0.039105	0.0624932		0.0111275	0.00181928	0.0117329	0.0021335	0.0182349
carbonylsulfide	0.000169965	0.00122474	0.00118859	0.00904413	0.00762042		0.000118789	0.000791612	0.000622412	0.00602953	0.0044819		0.00134093	0.00311839	0.00341129	0.0116659	0.0093028		0.00259499	0.00251845	0.0103381	0.00676378		0.0291175	0.023456		0.00582017	0.00089609	0.00862774	0.000885944	0.00797189
CF3Cl	0.00082248	0.00226861	0.00236164	0.00672072	0.00704345		0.00106457	0.00156377	0.00168949	0.00393504	0.00353996		0.00217246	0.00391343	0.0044061	0.00805625	0.00832282		0.00659344	0.00682377	0.00744875	0.00837684		0.0185626	0.0411124		0.00791314	0.00205578	0.00871724	0.00213556	0.016889
ch3mgcl	0.000928098	0.00481471	0.00264133	0.0283744	0.0170648		0.000831077	0.00208096	0.00177097	0.0140458	0.0124864		0.00118084	0.00247255	0.00314847	0.0122957	0.00682314		0.00305863	0.00278782	0.00972194	0.00793079		0.0220613	0.0293407		0.0144977	0.00530883	0.0458111	0.0107417	0.0247564
CH3PH2	0.00290724	0.00455091	0.00446368	0.0134148	0.0105236		0.00303574	0.0033338	0.0034449	0.0141381	0.0101953		0.0037456	0.00579032	0.00618875	0.0171284	0.0131259		0.00508809	0.00498085	0.0111438	0.00833527		0.0160117	0.0326487		0.00712318	0.00462074	0.0106096	0.00474442	0.0144158
ch3s_rad	0.000708998	0.0022652	0.00224972	0.0107699	0.00907946		0.00101802	0.00224123	0.00221591	0.0122203	0.00801811		0.00199388	0.00384372	0.00425011	0.0135052	0.0101202		0.00287777	0.00250379	0.00876704	0.00751786		0.0273385	0.0334184		0.00722212	0.00175719	0.00958532	0.00178461	0.016191
chlorinemonofluoride	0.000183	0.004306	0.00398	0.022192	0.021584		0.000778	0.001883	0.001734	0.011105	0.014185		0.002694	0.004699	0.004691	0.019744	0.02169		0.0051106	0.0050779	0.012282	0.01457		0.042325	0.06743		0.0145029	0.00197676	0.0167664	0.00257164	0.00972143
chlorinemonoxide	0.001147	0.00801	0.008277	0.029535	0.029578		0.002037	0.003673	0.003987	0.018772	0.022122		0.006054	0.01083	0.011585	0.029732	0.03075		0.0102917	0.0100633	0.023699	0.025098		0.055262	0.096851		0.020937	0.00324296	0.0229636	0.0034748	0.0263289
chlorinetrifluoride	0.000998487	0.0115534	0.0100653	0.0479599	0.0459559		0.00264091	0.00454385	0.0043331	0.025356	0.0317307		0.00809291	0.0119278	0.0112871	0.0406081	0.0431177		0.0113097	0.010957	0.0168858	0.0212101		0.100426	0.562225		0.0356629	0.00444057	0.0405777	0.00549684	0.0162216
chloro-ethene	0.00111787	0.00272278	0.00261289	0.0123212	0.00926112		0.00150547	0.00267905	0.00247181	0.0136191	0.00770253		0.00246677	0.00389299	0.00407158	0.0150252	0.0107177		0.00381789	0.00380931	0.0103349	0.00819974		0.0317893	0.0347457		0.00776324	0.00218532	0.0105677	0.00243116	0.0169432
chloroform	0.00138942	0.00402741	0.00392601	0.0144773	0.0140899		0.00162851	0.0027561	0.00282998	0.0094737	0.00848808		0.00308377	0.00594453	0.00671194	0.0148879	0.0140905		0.00430181	0.00472389	0.0120453	0.0128832		0.0349201	0.0552975		0.0106254	0.00238778	0.0117763	0.0025762	0.0182157
Cl2SO2	0.00114872	0.0107957	0.0104325	0.0474512	0.0453878		0.00245321	0.00508712	0.00526674	0.0414451	0.0455924		0.0124936	0.0226307	0.0228427	0.0538529	0.0534295		0.0141109	0.014819	0.0380423	0.0403789		0.144363	0.214202		0.0302129	0.00341388	0.033544	0.00349042	0.0290168
cl2	0.000202	0.007265	0.006932	0.024796	0.02343		0.001113	0.003159	0.003031	0.025186	0.028717		0.005022	0.008409	0.008697	0.021459	0.022428		0.0069295	0.0073588	0.020397	0.022261		0.074111	0.092755		0.0182488	0.00218166	0.0184665	0.00241441	0.0153668
ClN	0.001042	0.008269	0.008031	0.02696	0.026964		0.001684	0.003198	0.003214	0.0154	0.018653		0.005664	0.011184	0.011415	0.0263	0.026835		0.0114968	0.0110043	0.022031	0.022612		0.05004	0.091463		0.01997	0.00229619	0.0213929	0.0024482	0.0260526
dimethylsulfide	0.00711123	0.00756287	0.00732374	0.0179908	0.0165077		0.00626928	0.00754572	0.00881655	0.0186515	0.0151212		0.00718642	0.00976712	0.0100545	0.018381	0.0165004		0.00927389	0.00801358	0.0158047	0.0143612		0.0367272	0.0472618		0.0131787	0.00762241	0.0165619	0.00834911	0.0211297
dimethylsulfoxide	0.0107424	0.0173653	0.0163563	0.0352697	0.0356393		0.0114907	0.0182662	0.0181881	0.0340306	0.0379295		0.0160728	0.0197922	0.0198566	0.0390596	0.0377101		0.0263206	0.0277776	0.027785	0.0276325		0.0682436	0.101128		0.024566	0.0128578	0.0264757	0.0133564	0.0663651
disilane	0.0015581	0.00217965	0.00191894	0.0100756	0.00796643		0.00169025	0.00257972	0.00315644	0.0133032	0.0108005		0.0018705	0.00633782	0.00794596	0.0187376	0.0147405		0.00307673	0.0029556	0.0101506	0.00662152		0.0121314	0.154304		0.0115365	0.0256063	0.0162872	0.000924127	0.0176919
ethanethiol	0.00335255	0.00450756	0.00447673	0.0150921	0.0116833		0.00353621	0.00446676	0.00444654	0.0148657	0.0094929		0.00439534	0.00619351	0.00660326	0.0170809	0.0132672		0.0060134	0.00593159	0.0121959	0.0098918		0.0358531	0.0329422		0.00947265	0.00442921	0.0128493	0.00444388	0.0218042
ethylchloride	0.00288522	0.00397807	0.00397375	0.0122115	0.00929033		0.00303697	0.00397577	0.00381994	0.0135379	0.00924222		0.00332461	0.0048567	0.00515058	0.0150843	0.0108065		0.00490262	0.00497523	0.010008	0.00822984		0.0270335	0.0334648		0.00858534	0.00402491	0.0109213	0.0039638	0.0214848
H2CS	0.000231789	0.00142942	0.00137105	0.0106752	0.0071306		0.000388885	0.00154637	0.00133936	0.012422	0.00696083		0.00126816	0.0025444	0.00283735	0.0135889	0.00896696		0.00167547	0.00157482	0.00814465	0.00526114		0.0244471	0.0232849		0.00446748	0.000632717	0.00768472	0.000620073	0.0129472
hydrogenchloride	9.4e-05	0.001002	0.000943	0.00815	0.005945		9.6e-05	0.00089	0.001108	0.004981	0.002817		0.000803	0.001555	0.001813	0.008712	0.006097		0.0002275	0.0003977	0.003371	0.003291		0.014246	0.006672		0.00418172	0.000273277	0.00735318	0.000449707	0.00749916
hydrogensulfide	0.000739733	0.00158945	0.00138644	0.0105056	0.0085435		0.000554582	0.00175	0.0018753	0.00734291	0.00522718		0.00167446	0.00298627	0.00323796	0.0112912	0.00878573		0.00173653	0.00175018	0.00623525	0.00565369		0.0267497	0.0117104		0.00699304	0.000372401	0.0106387	0.000528931	0.00924543
hypochlorousacid	0.000793074	0.00442994	0.00392849	0.0193876	0.0178962		0.00113302	0.00298687	0.00272761	0.0109039	0.012993		0.00344424	0.00639738	0.00640077	0.0181324	0.0180643		0.00787171	0.00805553	0.0135412	0.0150997		0.0378147	0.0625013		0.0127827	0.00199236	0.0145883	0.00259755	0.0202715
li2ph	0.00994207	0.0290641	0.0270641	0.0930846	0.100872		0.0020767	0.0388684	0.0393943	0.0528589	0.0604566		0.0361574	0.0146946	0.0171298	0.0153869	0.00520009		0.00800091	0.00701006	0.041913	0.0718262		0.0353163	0.150982		0.0894693	0.0163808	0.0946129	0.0163094	0.0875033
li2s2	0.00397536	0.0140359	0.0136179	0.0209245	0.0193253		0.00285856	0.00964992	0.00995559	0.0396923	0.0419694		0.0044654	0.010355	0.0128068	0.0503896	0.0370531		0.00528912	0.00559327	0.0355438	0.0273747		0.0617992	0.152953		0.0239678	0.00650656	0.0273226	0.00666075	0.0249584
li2si2	5.59017e-05	0.00109581	0.0031654	0.000840174	0.00318139		0.000834945	0.00257492	0.00165008	0.00802305	0.0130641		0.0025642	0.00194905	0.00204349	0.0146253	0.00556059		0.00224466	0.00138871	0.0156102	0.00834872		0.0295679	0.258853		0.0059615	0.00413754	0.0100928	0.00407114	0.00525755
licl	1.7e-05	0.001156	0.001548	0.000421	0.001918		0.00173	0.002567	0.002305	0.012397	0.013611		0.000499	0.000781	0.00121	0.018013	0.001952		0.0008763	0.0003005	0.015611	0.002182		0.034132	0.050645		0.000594042	0.0030473	0.000762769	0.00296559	0.00911052
liph2	0.000313889	0.0015174	0.00187142	0.0076364	0.00632481		0.00049362	0.00238012	0.00227848	0.00931167	0.00973856		0.00145898	0.00186428	0.00223014	0.0136695	0.00745142		0.00166905	0.00080695	0.00899343	0.0031529		0.0174558	0.0157489		0.00274208	0.00204746	0.00616286	0.00258338	0.00571784
lish	0.00017515	0.0013201	0.00222361	0.00494457	0.00485706		0.000911553	0.00304751	0.00285513	0.0130796	0.0143409		0.00123938	0.00105402	0.00164463	0.0179596	0.00456643		0.000995634	0.000457423	0.0153461	0.00223032		0.0237253	0.0258937		0.001898	0.00281743	0.0042678	0.00266383	0.00912438
methanethiol	0.00206368	0.00317282	0.00299388	0.0124938	0.00992744		0.00223996	0.0028206	0.002791	0.0128426	0.00828315		0.00315902	0.00470379	0.00511677	0.0150199	0.0110665		0.00431296	0.00426799	0.00994656	0.00814012		0.0334284	0.0338419		0.00794443	0.00253384	0.0113595	0.00278818	0.0161525
methylchloride	0.000746861	0.00224154	0.00214056	0.0102468	0.00791549		0.000895144	0.00219932	0.00193132	0.0117455	0.00690849		0.00179993	0.00329772	0.00354767	0.012597	0.0083805		0.00288288	0.00288644	0.00742502	0.00683672		0.0241814	0.0349059		0.00685063	0.00175726	0.00906131	0.00190528	0.0154315
methylenechloride	0.000750399	0.00290319	0.00289195	0.0123717	0.0113994		0.00103249	0.00216534	0.00207354	0.0105429	0.00782387		0.00230953	0.00469394	0.00521409	0.0134369	0.0115397		0.00329981	0.003655	0.00965488	0.0101513		0.0301873	0.0467276		0.00902296	0.0018896	0.0102072	0.00189809	0.0168345
methylsilane	0.00269808	0.00417168	0.00409828	0.0127568	0.0105851		0.00303605	0.00430846	0.00439079	0.0161933	0.0127335		0.00389786	0.00769527	0.00808678	0.0196019	0.0159853		0.00535155	0.00491224	0.0134578	0.0102048		0.0160441	0.0352172		0.0118166	0.00280575	0.0128185	0.00297075	0.0263365
mg2h4	0.000654898	0.00629673	0.00338285	0.0266104	0.0168486		0.00154646	0.00129112	0.00192438	0.00876111	0.00960065		0.000819258	0.0021092	0.00301752	0.010102	0.00508494		0.0020971	0.00175722	0.0132778	0.00817603		0.0289848	0.0246255		0.0232408	0.00426861	0.0732857	0.013395	0.0391877
mgc2	0.000592965	0.00532202	0.00366466	0.0266728	0.0145304		0.000248903	0.00294165	0.00204649	0.0131942	0.0105751		0.0013242	0.00298379	0.00289845	0.0103532	0.00591364		0.00237671	0.00162435	0.00914709	0.0054918		0.0189343	0.0212025		0.0115875	0.00654873	0.0358101	0.0105428	0.0149931
mg-ch32	0.00139261	0.00609951	0.00432914	0.0318009	0.0185159		0.000792093	0.00355876	0.00296801	0.0193425	0.015027		0.00131176	0.00314408	0.00398987	0.0141451	0.0109217		0.00369895	0.00313452	0.00966098	0.00874066		0.0241222	0.0209492		0.0155089	0.00628617	0.0501455	0.0132897	0.0207031
mgcl2	0.000596859	0.00412902	0.00100184	0.0349395	0.0212632		0.000307003	0.000105328	0.000255563	0.0120988	0.0156139		0.000825478	0.00211554	0.00223557	0.0124516	0.00619966		0.00241283	0.00260487	0.0133922	0.00936032		0.0260324	0.0485228		0.015848	0.00468523	0.0554373	0.0105821	0.0365263
mgf2	0.0003217	0.00625436	0.00288142	0.0078204	0.00475936		0.000692389	0.00241438	0.00157829	0.00256543	0.0037763		0.000861404	0.00357217	0.00178731	0.000818946	0.000348644		6.7116e-05	0.00190252	0.012801	0.0114832		0.0180609	0.00582162		0.00778239	0.00806709	0.0232203	0.0145421	0.0103809
mgh2	0.000178813	0.00276956	0.0011782	0.00791757	0.00205186		0.00106553	5.71548e-06	0.00020984	0.000535622	0.000551135		0.00033558	0.00137335	0.00149664	0.00576202	0.00210166		0.000651156	0.00010247	0.00753545	0.00245765		0.00982327	0.00253114		0.000460307	0.000208354	0.0308474	0.00676873	0.0275225
mgh	0.000422	0.003496	0.002205	0.014635	0.009457		0.000642	0.001307	0.00083	0.001422	0.002867		0.000424	0.001973	0.001669	0.005447	0.002834		0.001491	0.0011134	0.005655	0.002867		0.005933	0.005412		0.00771441	0.00247097	0.0355941	0.0076768	0.0355525
mgoh	0.00219205	0.0162818	0.0217298	0.0397777	0.0405038		0.00362423	0.0062772	0.0049351	0.0273552	0.00601555		0.0159512	0.054479	0.052628	0.0730251	0.0655639		0.03081	0.0329253	0.0976763	0.0892526		0.22927	0.225351		0.00799648	0.0145197	0.0303716	0.0166947	0.225766
mgo	0.000571	0.004734	0.003251	0.011087	0.009495		0.000346	0.001427	0.001328	0.005918	0.005427		0.001322	0.003382	0.002656	0.005995	0.005356		0.0010694	0.0003379	0.002666	0.003839		0.009857	0.008561		0.00882006	0.00573447	0.0232385	0.00994123	0.00123301
mgsh	0.00238692	0.0104012	0.0130111	0.0556659	0.055707		0.0113576	0.00583262	0.0121282	0.0150453	0.0238059		0.014283	0.00701899	0.00739308	0.0408399	0.0260158		0.00417548	0.00615793	0.0149968	0.0129676		0.0596455	0.114461		0.0618358	0.0116745	0.0863802	0.0156598	0.0369175
mgs	9.5e-05	0.003466	0.002037	0.017828	0.011289		0.00055	0.000135	0.000212	0.007862	0.008856		0.001019	0.002153	0.002262	0.007501	0.005228		0.002527	0.0023005	0.008583	0.00667		0.014511	0.021035		0.0115343	0.00463946	0.0346316	0.00855768	0.0229121
na2c2	0.000161152	0.00316615	0.00205213	0.00878723	0.00523389		0.000124718	0.00586752	0.0033182	0.00447069	0.0045404		3.19061e-05	0.00221408	0.00173547	0.00759629	0.00600958		0.00812725	0.00609892	0.00439524	0.00136891		0.0277582	0.0279404		0.00593877	0.00168362	0.0136322	0.00450575	0.008866
na2nh	0.00363882	0.0146545	0.0134179	0.0371105	0.0396807		0.00432618	0.00828957	0.00576939	0.00598397	0.00789854		0.00947863	0.0229672	0.0204687	0.0333617	0.0248885		0.0198372	0.0227571	0.00501257	0.00464386		0.0275136	0.0690921		0.056628	0.0155433	0.0504696	0.0132058	0.0293874
na2o2	0.00115303	0.00601428	0.00508604	0.0154149	0.0138991		0.00170293	0.00665713	0.00586178	0.0108872	0.0132109		0.0044073	0.00735135	0.00721266	0.0109499	0.0125249		0.00605836	0.00620229	0.0164489	0.0154556		0.0120317	0.026714		0.0109206	0.00466567	0.0149717	0.00699146	0.0458878
na2o	0.000159217	0.00536438	0.00447522	0.00739011	0.00762281		0.00210656	0.00428579	0.00312555	0.00331906	0.00460504		0.00393306	0.011128	0.0106692	0.00227149	0.0031133		0.00171742	0.00167896	0.0135367	0.00576692		0.0161601	0.0235665		0.00155257	0.00321118	0.00675572	0.00709788	0.0546533
na2ph	0.00275864	0.0233461	0.0310086	0.108449	0.109673		0.00163146	0.00902626	0.0110848	0.0188545	0.0119994		0.00614815	0.0153765	0.0171135	0.0219024	0.00552828		0.00433479	0.00668119	0.0320827	0.0582091		0.0968369	0.0695274		0.101247	0.0260318	0.105934	0.02872	0.114208
na2s2	0.00661029	0.011572	0.0236268	0.0883919	0.0733193		0.0342845	0.0868316	0.0751637	0.138194	0.131942		0.0076135	0.048393	0.0520117	0.137145	0.125368		0.0370788	0.0237975	0.101731	0.0806633		0.0569528	0.466608		0.0756588	0.00536519	0.0390573	0.00607463	0.103334
na2si2	0.000485941	0.000622158	0.000261542	0.00676326	0.00304859		0.00123575	0.00723011	0.00588669	0.00589454	0.00938573		0.00632376	0.00194493	0.0022263	0.0091476	0.00760873		0.00310364	0.00138398	0.00900335	0.00231507		0.0448814	0.320846		0.014285	0.00215149	0.0276091	0.00163608	0.0106812
na2	0.000123	0.001075	0.001425	0.001176	0.002714		0.001008	0.001121	0.001175	0.003292	0.009558		0.007931	0.007651	0.003839	0.006822	0.004622		0.0137455	0.0071795	0.007746	0.000326		0.117817	0.215674		0.00207968	0.0019315	0.00197201	0.00190062	0.00201084
nach3	0.000577553	0.00273954	0.00225204	0.0139239	0.00776547		0.000562668	0.00198336	0.00122701	0.0125698	0.00520017		0.000746683	0.00315165	0.00277214	0.0111488	0.00583023		0.00143742	0.000851477	0.00616115	0.0020475		0.023094	0.054321		0.00755454	0.00276636	0.0125027	0.00343687	0.00910703
nacl	0.000138	0.002214	0.000989	0.005944	0.004317		0.000348	0.005684	0.005049	0.017438	0.016651		0.000868	0.00335	0.001571	0.000288	4e-06		0.0017479	0.0011496	0.000144	0.000115		0.038494	0.028695		0.00866438	5.17406e-06	0.0180057	0.00222888	0.00291125
nanh2	0.00031912	0.00125347	0.000896132	0.00605315	0.00723659		0.000719373	0.00495432	0.00420398	0.00954524	0.0101024		0.00217916	0.00169703	0.00189812	0.00795809	0.00695923		0.00783491	0.00750761	0.00790912	0.00563975		0.0229721	0.0335512		0.00699543	0.00162286	0.00600217	0.00306633	0.0203145
naoh	8.06143e-05	0.000974424	0.000362062	0.00958249	0.0099865		0.000452049	0.00563296	0.00515451	0.0162878	0.0162581		0.000603372	0.00132773	0.00164805	0.0137768	0.0133743		0.0125461	0.011835	0.0118153	0.0100215		0.0147647	0.00683758		0.00319916	0.00226857	0.00351632	0.00483211	0.0332439
naph2	0.000884459	0.00915586	0.00820732	0.0262581	0.0265828		0.0012329	0.0046984	0.00292664	0.0103927	0.00859284		0.00174555	0.00326997	0.00304083	0.0165788	0.00982949		0.00335498	0.00272759	0.00611414	0.0102859		0.016799	0.200758		0.0420143	0.00686897	0.0408686	0.0072453	0.0063352
nash	0.000587253	0.000666835	0.000874605	0.0050659	0.00352764		0.000732107	0.00546669	0.00428927	0.0130017	0.0136561		0.00123503	0.00241957	0.00179033	0.00685678	0.00473454		0.00150861	0.00115417	0.00298197	0.00191691		0.0297804	0.0123893		0.00713546	0.00168941	0.0175844	0.00136329	0.00461448
nitrosylchloride	0.0015933	0.00675323	0.00604561	0.0209337	0.0191542		0.00282549	0.00175657	0.00156301	0.00731514	0.0120446		0.00450734	0.00701746	0.00618953	0.0147397	0.0178481		0.0152934	0.0147017	0.0129832	0.0159225		0.0213698	0.0430658		0.0169965	0.00229846	0.0182314	0.00250126	0.0155667
p2	0.000278	0.002414	0.002494	0.008129	0.007723		0.00043	0.001108	0.001396	0.005944	0.005831		0.00162	0.003964	0.004737	0.01127	0.010697		0.0030838	0.003353	0.009476	0.006689		0.013984	0.048695		0.00376346	0.00167098	0.00765285	0.0015837	0.00363651
P4	0.000734566	0.00218508	0.00196392	0.0125242	0.012351		0.0012618	0.00164493	0.00227656	0.0135946	0.0154286		0.00449284	0.00882551	0.00982052	0.0239133	0.0240383		0.00469826	0.00466313	0.0125567	0.0140858		0.0191705	0.118191		0.00928344	0.00591528	0.0151945	0.00581084	0.00148054
PCl3	0.00186034	0.00858129	0.00863603	0.0261728	0.0261991		0.00234563	0.00415948	0.00503996	0.0181181	0.0221397		0.00688797	0.0124946	0.0136445	0.0299449	0.0315728		0.00730494	0.00805591	0.0266938	0.0302695		0.0510882	0.138459		0.0199087	0.0059647	0.0245252	0.00560487	0.00656445
PCl5	0.00126121	0.00592724	0.0056357	0.031357	0.0311314		0.00226168	0.00335969	0.00403776	0.0225657	0.0266652		0.00841314	0.0152606	0.0167818	0.0370872	0.038591		0.00829424	0.00916356	0.0274916	0.0315559		0.061146	0.17541		0.0179543	0.00585824	0.0275083	0.00602115	0.0118272
PF5	0.000685097	0.00360185	0.00346921	0.0279304	0.0268567		0.00172227	0.00265696	0.00320258	0.0216282	0.0245067		0.00512791	0.0101602	0.0100984	0.0390415	0.0412076		0.00311164	0.00272785	0.0169945	0.015587		0.0116328	0.118325		0.0127167	0.00638977	0.0214522	0.00756636	0.0110528
ph2_rad	0.000372975	0.00161471	0.00142765	0.00965308	0.00733521		0.000524316	0.00116686	0.00148848	0.00878204	0.00666977		0.00113538	0.00284978	0.00315583	0.0126345	0.00953233		0.0011961	0.00130853	0.00620929	0.00376452		0.00649655	0.0110561		0.00439172	0.000866912	0.00866806	0.00202659	0.00334786
phosphine	0.00101831	0.00265518	0.00231507	0.0103553	0.00781636		0.00111718	0.00152476	0.00171068	0.0094221	0.00734633		0.00164112	0.00317574	0.00354713	0.0133892	0.00996836		0.00210808	0.00226127	0.0066353	0.00539019		0.00693602	0.0134926		0.0049836	0.00210685	0.00861599	0.00334016	0.00374428
phosphorustrifluoride	0.000659232	0.0031199	0.00310839	0.0257572	0.0246827		0.00159159	0.00265049	0.0031399	0.0164771	0.0188933		0.00435843	0.00823156	0.00812589	0.0341566	0.0369594		0.00204903	0.00153207	0.0122693	0.0109898		0.012408	0.0973921		0.01189	0.00561655	0.0214912	0.00662336	0.0019646
PH	0.000159	0.001707	0.001641	0.008154	0.006333		0.000436	0.00121	0.001467	0.007536	0.005854		0.000818	0.002518	0.002854	0.010509	0.008118		0.0005589	0.0005218	0.005719	0.003259		0.00532	0.008293		0.00209358	0.000365951	0.0071469	0.000571833	0.00298137
PN	0.000215	0.002016	0.001793	0.008256	0.007084		0.000428	0.0015	0.001572	0.006836	0.006074		0.001525	0.004015	0.004275	0.011696	0.009976		0.0019947	0.0018642	0.008404	0.005771		0.008702	0.031831		0.0037887	0.00174898	0.00803801	0.00189167	0.00554318
POCl3	0.0014991	0.00646382	0.00635679	0.0279078	0.0278719		0.00231615	0.00423358	0.00462445	0.023924	0.027151		0.00838246	0.0161089	0.01711	0.0399663	0.0399022		0.00993322	0.010418	0.0233688	0.0249876		0.047247	0.165189		0.0159353	0.0069983	0.0249915	0.00728499	0.0152701
PO	0.000192	0.002633	0.002539	0.013899	0.01268		0.000626	0.002398	0.002307	0.012721	0.012744		0.002619	0.006163	0.006346	0.020086	0.019136		0.002436	0.0022211	0.012788	0.010422		0.008815	0.057745		0.00645328	0.00313152	0.0130094	0.00354663	0.00790572
PS	0.000348	0.003091	0.00313	0.011805	0.011805		0.00074	0.001494	0.001966	0.009055	0.009739		0.002884	0.005945	0.006885	0.015577	0.015357		0.0038044	0.0040927	0.012371	0.010755		0.033734	0.068266		0.00633185	0.00157126	0.0111708	0.00147691	0.00210522
S2Cl2	0.00220509	0.0122156	0.012181	0.0381468	0.0358755		0.00279422	0.00597289	0.00621402	0.0372739	0.0425792		0.00819091	0.0144682	0.0151467	0.0363562	0.0377228		0.010455	0.0110615	0.0402185	0.0439292		0.117104	0.153073		0.0320467	0.00350271	0.0334191	0.0039858	0.024264
s2	0.000455	0.004636	0.004501	0.016255	0.016687		0.000754	0.00222	0.002533	0.011314	0.01304		0.00404	0.00749	0.008388	0.01814	0.018641		0.0055071	0.0057881	0.015142	0.015571		0.073542	0.082197		0.0109023	0.000409408	0.0151506	0.000582565	0.00800219
SCl2	0.000846982	0.00988329	0.00963761	0.0311845	0.0304842		0.00177269	0.00482545	0.00529431	0.028915	0.0332937		0.006871	0.0123673	0.0130361	0.029773	0.0314989		0.00885241	0.00949571	0.0303681	0.0341423		0.101412	0.129793		0.0240281	0.00255415	0.0261802	0.00269767	0.0197205
SCl	0.000559	0.006595	0.006394	0.022082	0.021936		0.001069	0.003032	0.003144	0.017693	0.020821		0.005112	0.009087	0.009663	0.021214	0.022603		0.0071283	0.0074201	0.01853	0.021577		0.0767	0.09513		0.0164966	0.00190781	0.0189889	0.00207905	0.0122399
SF6	0.000756848	0.00552468	0.00555589	0.0385891	0.0377479		0.00175887	0.00244642	0.00277439	0.0132812	0.0179302		0.00695556	0.012019	0.0118959	0.0356555	0.0387515		0.00264083	0.00247101	0.0201082	0.018506		0.0871987	0.152314		0.0176019	0.00251707	0.029855	0.00356478	0.00034198
sh_rad	0.000119	0.001072	0.00119	0.008137	0.00624		0.000219	0.001054	0.001273	0.006563	0.004608		0.000955	0.00211	0.002401	0.009614	0.007295		0.0007221	0.0007117	0.004584	0.003526		0.020143	0.007139		0.00370134	5.777e-06	0.00710061	0.000125947	0.00793716
Si2H2	0.000215574	0.000737725	0.000529085	0.00871599	0.00587978		0.000400355	0.00108456	0.00118168	0.00929525	0.00649739		0.000920292	0.00263749	0.00392935	0.0158079	0.0119		0.00246942	0.00215031	0.00916357	0.00251772		0.0134959	0.12009		0.00851557	0.00114396	0.0120808	0.00114396	0.0196842
Si2H4	0.000405075	0.00128892	0.00105938	0.009587	0.0069303		0.000577538	0.00184138	0.00209861	0.0116921	0.00919878		0.000352659	0.00510279	0.00619572	0.0168157	0.0128245		0.00221861	0.00206162	0.00989463	0.00417085		0.0132595	0.140153		0.00964296	0.000867787	0.0132529	0.000784889	0.0152556
si2h5_rad	0.00246146	0.00355121	0.00312883	0.0105786	0.0085376		0.0034508	0.00409077	0.00596323	0.0137965	0.011528		0.00313493	0.00725371	0.00866423	0.019733	0.0157252		0.00674965	0.00559483	0.0109697	0.00749351		0.014476	0.162879		0.0121599	0.00295763	0.0179141	0.00311046	0.0188319
si2	0.000728	0.007374	0.007339	0.015573	0.015055		0.000876	0.001892	0.002425	0.0069	0.006627		0.001715	0.004649	0.005504	0.012814	0.012072		0.0047314	0.0052578	0.012131	0.010416		0.012406	0.274016		0.0123687	0.000689159	0.0188242	0.000621876	0.00421837
SiCl2	0.000804438	0.00417057	0.00395592	0.0151179	0.014976		0.00146246	0.00183744	0.0027445	0.0101167	0.0125813		0.00404854	0.00829643	0.00962611	0.0234425	0.0244139		0.00479938	0.00526674	0.0162886	0.0157477		0.0376876	0.162884		0.0211507	0.000790119	0.0278214	0.00143218	0.0158526
SiCl	0.000202	0.00192	0.001959	0.012927	0.012565		0.000857	0.001116	0.001685	0.007905	0.010373		0.003303	0.007143	0.007838	0.019649	0.020612		0.0044134	0.0048285	0.011455	0.011302		0.030287	0.126583		0.017045	0.000398798	0.0239045	0.000570808	0.0142038
SiH	0.000261	0.002016	0.00179	0.007335	0.005653		0.000345	0.001201	0.001411	0.007337	0.005911		0.000196	0.002863	0.003254	0.011211	0.008579		0.0016416	0.0016001	0.006329	0.00235		0.005122	0.040053		0.00564324	0.000672263	0.0107939	0.000549795	0.0107031
silane	0.00056912	0.00150965	0.00116906	0.00911071	0.00620599		0.000745479	0.00203343	0.00213297	0.0120889	0.00907751		0.000676125	0.0036908	0.00405515	0.0155806	0.0112943		0.00195038	0.00174275	0.00715951	0.00280768		0.00596476	0.0493731		0.0067535	0.000121454	0.010768	0.00025046	0.0166917
siliconmonoxide	0.000283	0.001453	0.001163	0.009323	0.007661		0.00073	0.002082	0.001484	0.009565	0.00873		0.002002	0.004884	0.004875	0.016585	0.014772		0.0013725	0.0009533	0.008401	0.006276		0.006046	0.004739		0.00964908	0.00137603	0.0140937	0.00152442	0.00879059
silicontetrafluoride	0.000511094	0.00185262	0.00163694	0.0215208	0.0196737		0.00158404	0.00335681	0.00307373	0.0221913	0.0245453		0.0044268	0.0106361	0.0102704	0.0417531	0.0435498		0.00213038	0.00139343	0.0132482	0.0109		0.00843463	0.0624925		0.0213277	0.00184587	0.0273697	0.00208952	0.0127186
silylene_singlet	0.000384397	0.00176161	0.00155214	0.00871931	0.00637922		0.000590451	0.00135573	0.00160302	0.00908378	0.00674873		0.000294541	0.00322581	0.00364381	0.0136779	0.00996108		0.0018863	0.00179199	0.00643606	0.00247199		0.00542698	0.0451431		0.00694154	0.000748236	0.0112474	0.000932391	0.0114835
silylene_triplet	0.000252836	0.00121085	0.0010242	0.00726806	0.00476854		0.000592333	0.00160285	0.00162054	0.0104958	0.00817737		0.000994727	0.00390975	0.00417701	0.0142101	0.0101412		0.00212643	0.00193788	0.00549834	0.00150688		0.00433982	0.0400089		0.00473742	0.00120442	0.0101978	0.00118654	0.0129953
silyl_rad	0.00085182	0.0023866	0.00227734	0.00857306	0.00581418		0.000998809	0.00191809	0.0019323	0.011148	0.00822119		0.00193394	0.00361427	0.00394614	0.0148889	0.0105923		0.00277206	0.00229477	0.00655058	0.00285131		0.00667663	0.0474506		0.00581309	0.00118506	0.0100813	0.00141069	0.019161
SiN	0.000238	0.001488	0.001206	0.00724	0.006005		0.000538	0.001675	0.001344	0.007439	0.006694		0.001607	0.004524	0.004566	0.012522	0.010853		0.0014331	0.0011416	0.007551	0.004918		0.008007	0.008542		0.00915346	0.000759464	0.0129491	0.000774225	0.0111211
SiP	0.000196	0.00083	0.001016	0.005616	0.005241		0.000465	0.000813	0.00102	0.00461	0.004989		0.001243	0.003928	0.004646	0.011509	0.010766		0.0028729	0.0028415	0.008211	0.004913		0.01277	0.057422		0.0074763	0.0516518	0.0121536	0.0515554	0.00207504
SiS	0.000171	0.001326	0.001381	0.007483	0.006707		0.000396	0.001029	0.001207	0.006183	0.00627		0.001614	0.004464	0.005222	0.012836	0.012057		0.0031529	0.0034083	0.008779	0.006287		0.023634	0.060418		0.00997527	0.000304664	0.0143931	0.000197454	0.00579919
SN	0.000532	0.0041	0.004083	0.014948	0.014232		0.000599	0.001954	0.002323	0.011318	0.012122		0.003186	0.006765	0.007294	0.018395	0.016989		0.0050989	0.0049706	0.014569	0.012193		0.033258	0.056115		0.00954156	0.000876372	0.0119984	0.000782764	0.013934
SO3	0.000827325	0.00689055	0.00681095	0.0344595	0.0331633		0.001543	0.00356625	0.00364179	0.0276049	0.029278		0.00767298	0.0152027	0.0154377	0.0426481	0.0409142		0.00719239	0.00694234	0.0292729	0.0255699		0.101612	0.163676		0.0194876	0.00262149	0.0242576	0.00255754	0.0218239
sodiumfluoride	0.000203	0.003129	0.002132	0.009898	0.008393		0.000336	0.005291	0.004937	0.02506	0.022567		0.001414	4.4e-05	0.000887	0.020466	0.016532		0.0146172	0.0150908	0.024795	0.021357		0.030216	0.015352		0.0036481	0.00396984	0.00668356	0.00629719	0.0252027
sodiumhydride	0.000138	0.001966	0.001513	0.0018	0.001452		0.000261	0.00026	0.000784	0.000128	8.9e-05		0.003624	0.001354	0.001161	0.00176	0.001482		0.0001627	0.0005052	0.000121	0.000152		0.02779	0.03113		0.00370774	0.00143246	0.00905756	0.00164065	0.00218564
sulfurdioxide	0.000625729	0.00739539	0.00726829	0.0287037	0.0276772		0.00121994	0.00380277	0.00386444	0.0227404	0.0243159		0.00630364	0.0123052	0.0124792	0.034874	0.0339102		0.00583745	0.00556763	0.02416	0.021666		0.0739275	0.120111		0.0176075	0.00241753	0.0219303	0.00234843	0.0233562
sulfurmonoxide	0.000645	0.004595	0.004582	0.019884	0.019311		0.000825	0.002744	0.002949	0.014919	0.016268		0.003912	0.008041	0.008264	0.023537	0.023665		0.0053766	0.0049505	0.017406	0.015918		0.046137	0.074859		0.0128507	0.00159703	0.0164578	0.00164188	0.0180572
tetrachloroethylene	0.000699692	0.00377902	0.00369988	0.0161322	0.0162223		0.0010382	0.0020486	0.00223006	0.0120077	0.0116268		0.0033555	0.00637208	0.00731373	0.0170406	0.0165634		0.00419162	0.00455796	0.0138931	0.0137563		0.047155	0.0587293		0.0119631	0.00182343	0.0126123	0.00210493	0.0193885
tetrachloro-silane	0.000704601	0.00181588	0.00189819	0.0141083	0.0138449		0.00143406	0.0023241	0.00283057	0.0145349	0.0175241		0.00494863	0.0111681	0.0124586	0.0287424	0.0288628		0.00480144	0.00550853	0.0138716	0.0126431		0.036289	0.163867		0.0224599	0.000889863	0.0270907	0.00101387	0.0245195
thiirane	0.00064327	0.00210912	0.00202354	0.0114056	0.00799531		0.000895483	0.0023563	0.00205809	0.0141124	0.00760487		0.00174757	0.0036519	0.00388057	0.0148386	0.01041		0.00284458	0.0026538	0.00930569	0.00745056		0.0301549	0.043113		0.00629094	0.00136289	0.00970694	0.00172052	0.0189679
thiophene	0.00123344	0.00301576	0.00298403	0.0141808	0.0113784		0.00150637	0.00266107	0.00246399	0.0164988	0.0105908		0.00280646	0.0048694	0.00529112	0.0179029	0.0136029		0.00423773	0.00405137	0.0125376	0.0102983		0.0350167	0.0364952		0.00851701	0.00191633	0.0115426	0.00199524	0.0202183
trichloro-borane	0.000428349	0.00169757	0.00160823	0.00888327	0.0077382		0.000710129	0.00164295	0.00182488	0.0058896	0.00515883		0.00182704	0.00336167	0.00414237	0.0118864	0.0103461		0.001575	0.00245026	0.00764398	0.00701034		0.0290856	0.0311409		0.00821193	0.000632998	0.0100384	0.000673089	0.00860769

## Sheet: disp-GGA
	6-311++G(2df,2pd)						6-31+G(d,p)						6-311G(2df,2pd)						6-31G(d,p)						pc-1-u						pc-1						aug-pc-1						pc-2-u						pc-2
	E_dimer(Ha)	E1 (Ha)	E2 (Ha)	De (kcal/mol)	Error (kcal/mol)		E_dimer(Ha)	E1 (Ha)	E2 (Ha)	De (kcal/mol)	Error (kcal/mol)		E_dimer(Ha)	E1 (Ha)	E2 (Ha)	De (kcal/mol)	Error (kcal/mol)		E_dimer(Ha)	E1 (Ha)	E2 (Ha)	De (kcal/mol)	Error (kcal/mol)		E_dimer(Ha)	E1 (Ha)	E2 (Ha)	De (kcal/mol)	Error (kcal/mol)		E_dimer(Ha)	E1 (Ha)	E2 (Ha)	De (kcal/mol)	Error (kcal/mol)		E_dimer(Ha)	E1 (Ha)	E2 (Ha)	De (kcal/mol)	Error (kcal/mol)		E_dimer(Ha)	E1 (Ha)	E2 (Ha)	De (kcal/mol)	Error (kcal/mol)		E_dimer(Ha)
MaxAE					0.831721						1.35435						3.81938						5.80945						3.86509						4.02932						3.90154						0.654737
MAE					0.304046						0.662547						1.94063						2.76773						1.94713						1.87082						1.53742						0.296531
100_BenzenedimerTshaped	-464.43	-232.216	-232.216	1.49894	0.283993		-464.29	-232.146	-232.146	1.03289	0.750038		-464.424	-232.213	-232.213	0.981423	0.801505		-464.266	-232.133	-232.133	0.540422	1.24251		-464.227	-232.114	-232.114	0.929364	0.853564		-464.206	-232.104	-232.104	0.962224	0.820704		-464.22	-232.11	-232.11	-0.129108	1.91204		-464.473	-232.238	-232.238	1.64568	0.137245		-464.471
101_IndolebenzeneTshapecomplex	-596.003	-232.216	-363.787	0.233322	0.368768		-595.823	-232.146	-363.677	-0.258702	0.860791		-595.995	-232.213	-363.781	-0.755311	1.3574		-595.795	-232.134	-363.659	-1.6019	2.20399		-595.741	-232.114	-363.626	-0.541532	1.14362		-595.716	-232.104	-363.612	-0.38196	0.98405		-595.739	-232.11	-363.626	-1.62933	2.23142		-596.058	-232.238	-363.82	0.335156	0.266934		-596.054
102_Phenoldimer	-614.93	-307.463	-307.463	-2.26103	0.430384		-614.734	-307.365	-307.365	-3.17631	1.34566		-614.919	-307.456	-307.456	-4.53254	2.7019		-614.7	-307.346	-307.346	-5.45119	3.62055		-614.647	-307.32	-307.32	-4.76656	2.93592		-614.622	-307.307	-307.307	-4.67788	2.84724		-614.652	-307.323	-307.323	-3.77861	1.94797		-614.987	-307.491	-307.492	-2.24595	0.415309		-614.983
81_Ammoniadimer	-113.124	-56.5604	-56.5604	-1.97364	0.181861		-113.079	-56.5375	-56.5375	-2.69776	0.905982		-113.113	-56.5529	-56.5529	-4.56973	2.77795		-113.059	-56.526	-56.526	-4.45234	2.66056		-113.058	-56.5254	-56.5254	-4.35739	2.5656		-113.042	-56.5179	-56.5179	-4.04835	2.25657		-113.062	-56.5295	-56.5295	-2.20054	0.408761		-113.133	-56.5645	-56.5645	-2.25628	0.464502		-113.132
82_Waterdimer	-152.9	-76.4465	-76.4464	-4.36416	0.33118		-152.838	-76.4147	-76.4146	-5.38733	1.35435		-152.88	-76.4343	-76.4343	-7.16707	3.13409		-152.805	-76.3964	-76.3964	-7.39282	3.35985		-152.803	-76.3958	-76.3958	-7.37343	3.34045		-152.791	-76.3898	-76.3898	-6.95527	2.92229		-152.819	-76.406	-76.406	-4.63663	0.603652		-152.912	-76.4523	-76.4523	-4.68772	0.654737		-152.912
83_BenzeneMethanecomplex	-272.714	-232.216	-40.5	1.17033	0.1358		-272.63	-232.146	-40.4863	1.073	0.233125		-272.711	-232.213	-40.4997	0.887832	0.418294		-272.616	-232.133	-40.4832	0.552047	0.754079		-272.593	-232.114	-40.4802	0.847263	0.458863		-272.576	-232.103	-40.4735	0.852808	0.453319		-272.584	-232.11	-40.4748	0.300246	1.00588		-272.74	-232.238	-40.5037	1.23089	0.0752314		-272.738
84_Formicaciddimer	-379.637	-189.806	-189.806	-15.868	0.213028		-379.5	-189.738	-189.738	-15.7118	0.0567644		-379.625	-189.797	-189.797	-19.3385	3.68354		-379.475	-189.72	-189.72	-21.4644	5.80945		-379.447	-189.708	-189.708	-19.4483	3.79335		-379.436	-189.702	-189.702	-19.6843	4.02932		-379.46	-189.717	-189.717	-16.6682	1.01324		-379.672	-189.823	-189.823	-16.0115	0.356467		-379.671
85_Formamidedimer	-339.866	-169.923	-169.923	-12.6419	0.0798879		-339.746	-169.863	-169.863	-12.6784	0.11646		-339.853	-169.914	-169.914	-15.6745	3.11252		-339.72	-169.845	-169.845	-18.1872	5.62519		-339.698	-169.836	-169.836	-15.9359	3.37391		-339.682	-169.829	-169.829	-15.8637	3.30177		-339.708	-169.843	-169.843	-13.501	0.939034		-339.896	-169.938	-169.938	-12.9115	0.349502		-339.895
86_Uracildimerhbonded	-829.771	-414.873	-414.873	-16.5711	0.240904		-829.493	-414.733	-414.733	-16.9214	0.591175		-829.749	-414.86	-414.86	-18.7834	2.45318		-829.445	-414.706	-414.706	-20.8723	4.54206		-829.379	-414.674	-414.674	-19.122	2.79177		-829.356	-414.663	-414.663	-19.009	2.67876		-829.404	-414.688	-414.688	-17.7259	1.39566		-829.844	-414.909	-414.909	-16.6552	0.324969		-829.841
87_2pyridoxine2aminopyridinecomplex	-627.195	-323.532	-303.643	-12.8737	0.247193		-626.996	-323.428	-303.547	-13.2436	0.617128		-627.182	-323.523	-303.635	-15.4501	2.8236		-626.963	-323.407	-303.528	-17.7589	5.13247		-626.91	-323.381	-303.503	-16.1315	3.50503		-626.886	-323.37	-303.49	-16.0886	3.46219		-626.917	-323.387	-303.507	-14.3214	1.69492		-627.251	-323.561	-303.67	-13.0071	0.380598		-627.248
88_AdeninethymineWatsonCrickcomplex	-921.544	-467.347	-454.178	-11.8424	0.319517		-921.247	-467.2	-454.027	-12.1656	0.642707		-921.523	-467.334	-454.165	-14.8302	3.30728		-921.2	-467.173	-454	-17.0926	5.56973		-921.119	-467.132	-453.963	-15.388	3.86509		-921.089	-467.117	-453.948	-15.2531	3.73024		-921.142	-467.146	-453.975	-13.409	1.88611		-921.625	-467.388	-454.218	-11.8942	0.371277		-921.62
89_Methanedimer	-80.9992	-40.5001	-40.5001	0.654038	0.000905742		-80.9719	-40.4865	-40.4865	0.666888	0.0119447		-80.9987	-40.4998	-40.4998	0.589997	0.0649465		-80.9662	-40.4834	-40.4834	0.363908	0.291035		-80.9598	-40.4804	-40.4804	0.595808	0.0591355		-80.9466	-40.4737	-40.4737	0.512144	0.1428		-80.9496	-40.475	-40.475	0.252985	0.401959		-81.0066	-40.5038	-40.5038	0.654492	0.000450929		-81.0057
90_Ethenedimer	-157.146	-78.5739	-78.5739	1.05511	0.00977743		-157.094	-78.5478	-78.5478	0.851251	0.213639		-157.143	-78.572	-78.572	0.527801	0.53709		-157.081	-78.5406	-78.5406	-0.115767	1.18066		-157.074	-78.5376	-78.5376	0.709802	0.355089		-157.059	-78.5302	-78.5302	0.756713	0.308177		-157.066	-78.5331	-78.5331	0.47844	0.58645		-157.161	-78.5813	-78.5813	1.03674	0.0281484		-157.16
91_Benzenedimerparalleldisplaced	-464.426	-232.216	-232.216	4.35991	0.375492		-464.285	-232.146	-232.146	4.03449	0.700917		-464.42	-232.213	-232.213	3.43528	1.30012		-464.262	-232.133	-232.133	3.01925	1.71616		-464.222	-232.114	-232.114	3.73944	0.995966		-464.201	-232.103	-232.103	3.80377	0.93163		-464.216	-232.11	-232.11	2.75782	1.97758		-464.469	-232.238	-232.238	4.62282	0.112582		-464.466
92_Pyrazinedimer	-528.63	-264.318	-264.318	3.23002	0.393813		-528.467	-264.236	-264.236	3.05379	0.570039		-528.619	-264.311	-264.311	2.09631	1.52752		-528.441	-264.222	-264.222	1.67914	1.94469		-528.39	-264.197	-264.197	1.96241	1.66142		-528.373	-264.188	-264.188	2.04558	1.57825		-528.402	-264.202	-264.202	1.59267	2.03116		-528.677	-264.341	-264.341	3.36246	0.261368		-528.674
93_Uracildimerstack	-829.746	-414.873	-414.873	0.247923	0.737417		-829.467	-414.733	-414.733	-0.0879492	1.07329		-829.724	-414.86	-414.86	-2.22555	3.21089		-829.417	-414.706	-414.706	-2.44118	3.42652		-829.352	-414.675	-414.675	-1.19325	2.17859		-829.328	-414.663	-414.663	-1.0989	2.08424		-829.379	-414.688	-414.688	-1.72948	2.71482		-829.818	-414.909	-414.909	0.579195	0.406145		-829.814
94_Indolebenzenecomplexstack	-595.995	-232.216	-363.787	5.49839	0.556422		-595.815	-232.146	-363.677	4.96887	1.08594		-595.987	-232.213	-363.781	4.19183	1.86298		-595.786	-232.133	-363.658	3.83599	2.21881		-595.733	-232.114	-363.626	4.37966	1.67514		-595.708	-232.104	-363.612	4.41357	1.64123		-595.731	-232.11	-363.626	3.38431	2.6705		-596.049	-232.238	-363.82	5.82811	0.226692		-596.045
95_Adeninethyminecomplexstack	-921.52	-467.347	-454.178	2.96073	0.831721		-921.224	-467.2	-454.028	2.50262	1.28983		-921.5	-467.334	-454.166	-0.0269349	3.81938		-921.174	-467.173	-454	-0.480392	4.27284		-921.094	-467.131	-453.964	0.280111	3.51234		-921.065	-467.116	-453.949	0.231957	3.56049		-921.121	-467.146	-453.975	-0.109092	3.90154		-921.601	-467.388	-454.218	3.19734	0.595111		-921.596
96_Etheneethynecomplex	-155.905	-78.5739	-77.3302	-0.379225	0.0544064		-155.851	-78.5478	-77.3017	-0.670883	0.346064		-155.901	-78.572	-77.328	-0.849072	0.524254		-155.836	-78.5406	-77.2927	-1.49445	1.16963		-155.834	-78.5376	-77.2954	-0.726765	0.401946		-155.82	-78.5302	-77.2885	-0.666173	0.341355		-155.825	-78.5331	-77.2907	-0.929029	0.60421		-155.92	-78.5813	-77.3377	-0.37521	0.0503911		-155.918
97_Benzenewatercomplex	-308.664	-232.216	-76.4464	-0.91636	0.406358		-308.562	-232.146	-76.4145	-1.32414	0.814134		-308.651	-232.213	-76.4343	-2.1371	1.6271		-308.533	-232.134	-76.3964	-2.16246	1.65246		-308.514	-232.114	-76.3957	-2.19461	1.68461		-308.497	-232.104	-76.3898	-2.04402	1.53402		-308.519	-232.11	-76.406	-1.98192	1.47191		-308.692	-232.238	-76.4522	-1.14319	0.633189		-308.691
98_Benzeneammoniacomplex	-288.776	-232.216	-56.5602	0.270323	0.22704		-288.683	-232.146	-56.5372	0.0113463	0.486017		-288.767	-232.213	-56.5529	-0.446811	0.944174		-288.66	-232.133	-56.526	-0.657431	1.15479		-288.64	-232.114	-56.5253	-0.400442	0.897806		-288.622	-232.104	-56.5178	-0.362226	0.85959		-288.64	-232.11	-56.5293	-0.687441	1.1848		-288.802	-232.238	-56.5643	0.236407	0.260957		-288.8
99_BenzeneHCNcomplex	-325.657	-232.216	-93.4388	-1.26904	0.263132		-325.554	-232.146	-93.406	-1.51594	0.510033		-325.652	-232.213	-93.4359	-1.71014	0.70424		-325.535	-232.134	-93.3981	-2.34805	1.34215		-325.513	-232.114	-93.3962	-1.79345	0.787543		-325.498	-232.104	-93.3917	-1.69574	0.689831		-325.51	-232.11	-93.3964	-2.2454	1.2395		-325.687	-232.238	-93.4473	-1.15779	0.151883		-325.685
[truncated: 148 more columns]

## Sheet: IP-GGA
				Stuttgart					SBKJC					6-311G(2df,2pd)-u					6-311G(2df,2pd)					6-31G(d,p)-u					6-31G(d,p)					pc-1-u					pc-1					pc-2-u					pc-2
				Neutral (Ha)	Cation (Ha)	IP (kcal/mol)	Error (kcal/mol)		Neutral (Ha)	Cation (Ha)	IP (kcal/mol)	Error (kcal/mol)		Neutral (Ha)	Cation (Ha)	IP (kcal/mol)	Error (kcal/mol)		Neutral (Ha)	Cation (Ha)	IP (kcal/mol)	Error (kcal/mol)		Neutral (Ha)	Cation (Ha)	IP (kcal/mol)	Error (kcal/mol)		Neutral (Ha)	Cation (Ha)	IP (kcal/mol)	Error (kcal/mol)		Neutral (Ha)	Cation (Ha)	IP (kcal/mol)	Error (kcal/mol)		Neutral (Ha)	Cation (Ha)	IP (kcal/mol)	Error (kcal/mol)		Neutral (Ha)	Cation (Ha)	IP (kcal/mol)	Error (kcal/mol)		Neutral (Ha)
			MaxAE				34.4823					16.3933					7.38227					7.54796					14.0291					16.726					12.8256					12.4335					2.81334
Spin	Spin-cat	Elelement	MAE				7.14533					3.65062					1.58623					1.62502					3.2351					4.68741					1.7937					1.9236					0.476832
0	1	C	1,3-butadiene	-26.1892	-25.8756	196.76	-6.10752		-26.0277	-25.7127	197.681	-5.18617		-155.967	-155.645	201.619	-1.2486		-155.96	-155.638	201.799	-1.06832		-155.926	-155.61	198.421	-4.44611		-155.903	-155.592	195.41	-7.45728		-155.893	-155.57	202.834	-0.03306		-155.883	-155.56	202.801	-0.0664657		-155.977	-155.654	203.128	0.261055		-155.976
0	1	C	2-butyne	-26.1759	-25.844	208.266	-4.01984		-26.0081	-25.6782	206.996	-5.29022		-155.958	-155.622	211.35	-0.935764		-155.951	-155.615	211.349	-0.93723		-155.917	-155.585	208.851	-3.43505		-155.893	-155.565	205.846	-6.43987		-155.884	-155.545	212.866	0.579601		-155.872	-155.534	212.101	-0.185115		-155.968	-155.63	212.369	0.0825572		-155.967
0	1	C	2-methyl-1-propene	-27.4062	-27.0807	204.239	-4.98158		-27.2486	-26.9234	204.072	-5.1491		-157.19	-156.858	208.54	-0.681105		-157.184	-156.851	208.489	-0.731752		-157.15	-156.822	205.833	-3.38839		-157.129	-156.804	203.491	-5.73041		-157.115	-156.781	209.332	0.110949		-157.102	-156.769	209.099	-0.121702		-157.2	-156.866	209.399	0.17769		-157.199
0	1	C	acetaldehyde	-29.7434	-29.384	225.512	-3.97414		-29.5801	-29.2186	226.842	-2.64416		-153.84	-153.478	227.063	-2.42317		-153.834	-153.472	226.964	-2.52192		-153.796	-153.436	225.594	-3.89238		-153.776	-153.419	223.615	-5.87059		-153.764	-153.399	229.058	-0.42757		-153.757	-153.392	229.211	-0.275221		-153.853	-153.488	229.539	0.0534741		-153.853
0	1	C	acetamide	-40.3104	-39.9694	214	-8.10187		-40.0898	-39.7415	218.612	-3.48991		-209.232	-208.884	218.276	-3.82574		-209.224	-208.876	218.201	-3.90166		-209.171	-208.826	216.421	-5.68118		-209.144	-208.803	213.795	-8.30763		-209.13	-208.778	220.982	-1.12022		-209.119	-208.767	221.244	-0.85805		-209.252	-208.898	222.115	0.0127306		-209.251
0	1	C	aceticacid	-45.8215	-45.4431	237.466	-4.62358		-45.5697	-45.1889	238.984	-3.10516		-229.12	-228.739	238.717	-3.37264		-229.111	-228.731	238.61	-3.47873		-229.051	-228.673	237.241	-4.84791		-229.022	-228.649	234.537	-7.5521		-229.006	-228.62	241.757	-0.332494		-228.997	-228.611	241.849	-0.239817		-229.141	-228.755	242.263	0.174159		-229.14
0	1	C	acetone	-36.6102	-36.2708	212.985	-3.59915		-36.409	-36.0681	213.909	-2.67513		-193.153	-192.812	214.419	-2.1657		-193.146	-192.804	214.354	-2.23075		-193.1	-192.761	212.55	-4.03448		-193.075	-192.74	210.4	-6.1844		-193.059	-192.714	216.751	0.166205		-193.049	-192.703	216.987	0.402563		-193.169	-192.823	216.756	0.171727		-193.167
0	1	C	acetonitrile	-23.0389	-22.6033	273.375	-2.73952		-22.9076	-22.4761	270.773	-5.34178		-132.759	-132.322	274.763	-1.35221		-132.754	-132.316	274.622	-1.49341		-132.725	-132.29	273.167	-2.94827		-132.704	-132.273	270.186	-5.9294		-132.697	-132.256	276.31	0.195185		-132.69	-132.25	275.506	-0.609052		-132.769	-132.329	276.14	0.0255049		-132.768
0	1	C	acetylene	-12.4432	-12.0374	254.653	-5.20377		-12.3488	-11.9485	251.193	-8.6633		-77.3317	-76.9195	258.687	-1.16983		-77.328	-76.9157	258.69	-1.16696		-77.3087	-76.9012	255.685	-4.17153		-77.2929	-76.8909	252.231	-7.62524		-77.2954	-76.8808	260.168	0.311064		-77.2889	-76.8757	259.254	-0.603034		-77.3377	-76.9236	259.864	0.00742047		-77.3372
0	1	F	acetylfluoride	-53.4904	-53.0716	262.822	-3.13076		-53.1768	-52.759	262.162	-3.79068		-253.143	-252.725	261.923	-4.02964		-253.134	-252.717	261.754	-4.19818		-253.064	-252.65	259.542	-6.41042		-253.035	-252.627	256.46	-9.49282		-253.015	-252.592	265.582	-0.370202		-253.008	-252.585	265.613	-0.338852		-253.168	-252.744	266.227	0.274422		-253.167
0	1	C	acrylonitrile	-28.6801	-28.3009	237.936	-4.67439		-28.5069	-28.1295	236.825	-5.78547		-170.841	-170.457	241.011	-1.59989		-170.833	-170.449	240.994	-1.6171		-170.797	-170.417	238.489	-4.12166		-170.77	-170.394	235.586	-7.02524		-170.761	-170.374	242.348	-0.262947		-170.753	-170.366	242.389	-0.221771		-170.853	-170.466	242.606	-0.00506854		-170.852
0	1	C	allene	-19.3155	-18.9601	222.988	-4.74618		-19.1886	-18.8345	222.235	-5.49914		-116.65	-116.29	226.312	-1.42259		-116.645	-116.284	226.269	-1.46542		-116.619	-116.262	223.727	-4.00719		-116.601	-116.248	221.399	-6.33537		-116.595	-116.232	227.645	-0.0887587		-116.586	-116.223	227.73	-0.00425074		-116.659	-116.296	227.727	-0.00750961		-116.658
0	1	N	ammonia	-11.723	-11.3438	237.921	-13.7635		-11.6703	-11.2748	248.188	-3.49653		-56.5551	-56.1571	249.738	-1.9465		-56.5532	-56.1558	249.38	-2.30372		-56.5356	-56.142	246.99	-4.69438		-56.5264	-56.135	245.622	-6.06182		-56.5256	-56.1315	247.34	-4.34368		-56.5186	-56.1211	249.39	-2.29369		-56.5646	-56.1652	250.62	-1.0644		-56.5643
0	1	C	aziridine	-24.174	-23.8336	213.551	-8.42972		-24.0609	-23.7129	218.414	-3.56656		-133.91	-133.559	219.963	-2.01674		-133.904	-133.554	219.952	-2.02808		-133.874	-133.527	217.724	-4.2559		-133.856	-133.512	215.557	-6.42293		-133.844	-133.494	219.85	-2.13067		-133.834	-133.483	220.349	-1.63113		-133.92	-133.568	221.404	-0.576505		-133.919
2	1	B	b2	-5.29949	-4.95034	219.095	-1.64092		-5.27549	-4.93237	215.31	-5.42642		-49.4098	-49.0582	220.671	-0.0656841		-49.4066	-49.0552	220.532	-0.204075		-49.3996	-49.0529	217.596	-3.14051		-49.3931	-49.0487	216.088	-4.64846		-49.3902	-49.0381	220.943	0.207031		-49.3893	-49.0378	220.614	-0.121983		-49.4126	-49.0607	220.791	0.0548955		-49.4125
0	1	B	b2h6	-9.1131	-8.70229	257.792	-2.7716		-9.0794	-8.66485	260.134	-0.429081		-53.2466	-52.8314	260.499	-0.0639871		-53.2438	-52.8289	260.346	-0.216993		-53.233	-52.8199	259.228	-1.33562		-53.2252	-52.8151	257.371	-3.19229		-53.2187	-52.8029	260.9	0.33657		-53.2111	-52.7978	259.382	-1.18165		-53.2499	-52.8348	260.484	-0.0794559		-53.2492
0	1	Be	be2	-1.98966	-1.73495	159.828	-1.606		-1.98699	-1.73051	160.943	-0.490917		-29.3306	-29.0733	161.476	0.0419181		-29.3276	-29.0706	161.307	-0.127207		-29.3264	-29.0715	159.988	-1.44655		-29.3222	-29.0682	159.427	-2.00733		-29.3185	-29.0606	161.855	0.420989		-29.3184	-29.0598	162.231	0.79686		-29.3316	-29.0742	161.466	0.0321841		-29.3314
0	1	Be	be2h4	-4.49253	-4.10304	244.412	-2.33134		-4.4868	-4.09437	246.259	-0.484558		-31.8498	-31.4567	246.701	-0.0424144		-31.8468	-31.4538	246.582	-0.161403		-31.8431	-31.4509	246.095	-0.648347		-31.8336	-31.4446	244.128	-2.61516		-31.8296	-31.4356	247.257	0.514157		-31.8266	-31.4333	246.829	0.0859918		-31.851	-31.4578	246.74	-0.00282794		-31.8504
0	1	Be	bec2	-12.208	-11.8633	216.266	-4.7817		-12.1449	-11.8019	215.264	-5.7831		-90.781	-90.4292	220.765	-0.282052		-90.7757	-90.4242	220.568	-0.47926		-90.7598	-90.4123	218.035	-3.01279		-90.7408	-90.3977	215.297	-5.75063		-90.7346	-90.3818	221.354	0.306567		-90.7315	-90.3782	221.657	0.609464		-90.7852	-90.4332	220.906	-0.1418		-90.7845
0	1	Be	be-ch32	-15.9805	-15.6153	229.183	-1.03652		-15.9035	-15.5401	227.987	-2.23321		-94.5522	-94.1856	230.067	-0.153179		-94.5475	-94.1809	230.081	-0.13865		-94.5289	-94.1647	228.569	-1.65057		-94.5113	-94.1525	225.161	-5.0592		-94.5035	-94.1331	232.411	2.19109		-94.4918	-94.1212	232.582	2.36249		-94.5568	-94.1896	230.458	0.238013		-94.5558
0	1	Be	bef2	-49.8736	-49.3668	317.983	-9.20495		-49.5664	-49.049	324.682	-2.50553		-214.669	-214.149	326.107	-1.08065		-214.66	-214.14	326.395	-0.792194		-214.59	-214.083	318.289	-8.89809		-214.562	-214.058	316.04	-11.1477		-214.534	-214.02	322.799	-4.38864		-214.532	-214.017	323.386	-3.80194		-214.687	-214.166	327.17	-0.0171965		-214.686
0	1	Be	beh2	-2.22368	-1.80327	263.808	-3.05888		-2.22171	-1.79844	265.605	-1.26201		-15.8999	-15.4747	266.846	-0.0208901		-15.8982	-15.473	266.817	-0.049331		-15.8969	-15.4725	266.303	-0.563956		-15.8922	-15.4704	264.691	-2.17605		-15.8912	-15.4651	267.349	0.482487		-15.8897	-15.4644	266.884	0.017585		-15.9006	-15.4754	266.836	-0.030285		-15.9004
0	1	C	benzene	-37.5654	-37.2375	205.738	-3.76426		-37.3255	-37.0005	203.922	-5.58075		-232.224	-231.893	207.705	-1.7975		-232.213	-231.882	207.76	-1.74219		-232.166	-231.84	204.526	-4.97655		-232.135	-231.813	202.301	-7.20175		-232.115	-231.781	209.495	-0.00754361		-232.105	-231.77	210.223	0.720659		-232.238	-231.905	209.468	-0.0347101		-232.237
0	1	Be	beo	-17.0628	-16.6902	233.754	-2.51264		-16.9655	-16.5988	230.111	-6.15582		-89.9327	-89.5571	235.674	-0.593283		-89.928	-89.5524	235.697	-0.570377		-89.906	-89.5324	234.438	-1.82926		-89.8886	-89.5186	232.182	-4.0845		-89.869	-89.5031	229.558	-6.70874		-89.8674	-89.5011	229.904	-6.36294		-89.9361	-89.562	234.756	-1.51045		-89.9357
0	1	Be	beoh	-34.4967	-34.1179	237.699	-17.8088		-34.3026	-33.9002	252.52	-2.98681		-166.567	-166.163	253.53	-1.97704		-166.559	-166.155	253.618	-1.88901		-166.507	-166.11	249.351	-6.15595		-166.478	-166.086	246.129	-9.37842		-166.46	-166.063	249.074	-6.43301		-166.451	-166.057	247.022	-8.48544		-166.579	-166.174	254.637	-0.87056		-166.579
1	0	Be	berylliumhydride	-1.57817	-1.27269	191.693	-1.03229		-1.57613	-1.26988	192.175	-0.549803		-15.2488	-14.9419	192.616	-0.109146		-15.2472	-14.94	192.769	0.0439659		-15.2457	-14.9406	191.451	-1.27387		-15.2422	-14.9377	191.075	-1.65012		-15.2392	-14.9351	190.805	-1.91957		-15.2381	-14.9343	190.654	-2.07115		-15.2488	-14.9425	192.226	-0.499261		-15.2484
0	1	B	bf	-27.0725	-26.6637	256.528	4.5721		-26.9174	-26.5163	251.737	-0.218961		-124.696	-124.296	250.767	-1.18838		-124.692	-124.292	250.828	-1.12745		-124.652	-124.258	247.343	-4.61277		-124.637	-124.245	245.867	-6.08848		-124.63	-124.229	252.042	0.0868632		-124.626	-124.223	252.849	0.893743		-124.708	-124.306	252.067	0.111656		-124.707
0	1	B	bh	-3.22679	-2.88071	217.174	-4.00192		-3.21502	-2.86717	218.281	-2.8951		-25.281	-24.9291	220.808	-0.368121		-25.2795	-24.9278	220.669	-0.506927		-25.2735	-24.9263	217.925	-3.25044		-25.2691	-24.9238	216.649	-4.52652		-25.2699	-24.9187	220.413	-0.763048		-25.2686	-24.9173	220.444	-0.732118		-25.2827	-24.9306	220.956	-0.219203		-25.2825
0	1	B	bh3	-4.52882	-4.06446	291.396	-4.9937		-4.51218	-4.04456	293.436	-2.953		-26.5921	-26.1198	296.377	-0.012739		-26.5905	-26.1185	296.199	-0.190062		-26.5852	-26.1146	295.274	-1.11509		-26.5806	-26.1129	293.453	-2.93637		-26.5788	-26.1065	296.404	0.0145649		-26.5749	-26.1053	294.663	-1.72616		-26.5938	-26.1215	296.331	-0.0584848		-26.5933
0	1	C	bicyclobutane	-26.1185	-25.7921	204.81	-2.70877		-25.9832	-25.6637	200.447	-7.07156		-155.919	-155.588	207.173	-0.345788		-155.912	-155.582	207.141	-0.378029		-155.879	-155.555	203.595	-3.92396		-155.86	-155.538	201.857	-5.66151		-155.845	-155.515	207.452	-0.0667926		-155.835	-155.503	208.09	0.571074		-155.928	-155.597	207.524	0.00563663		-155.927
2	1	B	BN	-12.5517	-12.1145	274.355	-0.443369		-12.4858	-12.05	273.483	-1.31564		-79.4264	-78.99	273.848	-0.950688		-79.4227	-78.9865	273.715	-1.08357		-79.4066	-78.9739	271.555	-3.24345		-79.394	-78.9637	270.043	-4.75516		-79.3912	-78.954	274.321	-0.477402		-79.3889	-78.9513	274.564	-0.234379		-79.4324	-78.9947	274.693	-0.104966		-79.4321
1	0	B	bo	-18.7953	-18.3181	299.389	2.40664		-18.6897	-18.2135	298.804	1.82177		-100.052	-99.5808	295.962	-1.01985		-100.048	-99.5766	295.917	-1.06513		-100.022	-99.5545	293.678	-3.30358		-100.006	-99.5401	292.608	-4.37421		-100.004	-99.532	296.461	-0.521113		-100	-99.5265	297.212	0.230128		-100.061	-99.5875	296.961	-0.020986		-100.06
0	1	B	Boranamine	-15.1449	-14.7407	253.646	-8.08459		-15.0666	-14.6624	253.664	-8.06607		-82.0332	-81.6177	260.736	-0.994662		-82.0298	-81.6144	260.664	-1.06624		-82.0089	-81.598	257.813	-3.9175		-81.9952	-81.5889	254.996	-6.73417		-81.9933	-81.5769	261.294	-0.436631		-81.9842	-81.5682	261.038	-0.692738		-82.04	-81.6231	261.631	-0.09955		-82.0393
0	1	B	borazine	-42.0074	-41.6561	220.464	-5.37732		-41.7798	-41.4278	220.903	-4.93822		-242.659	-242.302	224.325	-1.51649		-242.649	-242.292	224.343	-1.49797		-242.594	-242.242	220.536	-5.3054		-242.56	-242.213	218.131	-7.70993		-242.545	-242.186	224.907	-0.934466		-242.528	-242.17	225.045	-0.796435		-242.675	-242.315	225.624	-0.216877		-242.673
0	1	B	boric-acid	-52.8834	-52.4789	253.827	-8.37287		-52.5932	-52.1801	259.264	-2.9356		-252.546	-252.136	257.083	-5.11625		-252.538	-252.128	257.064	-5.13566		-252.461	-252.058	253.411	-8.7882		-252.428	-252.029	250.206	-11.9939		-252.416	-252.003	259.144	-3.05597		-252.404	-251.99	259.431	-2.76892		-252.574	-252.156	261.888	-0.311218		-252.573
0	1	B	boron-trioxide	-53.8932	-53.463	269.972	-4.15888		-53.5866	-53.1544	271.221	-2.90941		-275.614	-275.18	272.151	-1.9789		-275.603	-275.169	272.092	-2.03828		-275.53	-275.099	270.154	-3.97613		-275.489	-275.065	266.264	-7.86646		-275.477	-275.04	274.672	0.541415		-275.469	-275.028	276.368	2.23778		-275.635	-275.198	274.249	0.118252		-275.634
0	1	C	c2	-11.0248	-10.5722	284.047	-0.252484		-10.9476	-10.508	275.884	-8.41509		-75.9063	-75.4536	284.043	-0.256474		-75.9028	-75.4503	283.929	-0.370787		-75.8894	-75.4408	281.496	-2.80393		-75.8761	-75.4315	278.999	-5.30023		-75.8746	-75.4198	285.398	1.09835		-75.8729	-75.4187	285.015	0.715434		-75.9116	-75.4583	284.4	0.100926		-75.9113
1	0	C	c2h3_rad	-13.0096	-12.6696	213.357	-2.18671		-12.9261	-12.5781	218.358	2.81425		-77.8955	-77.554	214.261	-1.28294		-77.8922	-77.5506	214.376	-1.16811		-77.8737	-77.5346	212.768	-2.77659		-77.861	-77.5236	211.694	-3.85053		-77.8589	-77.5146	216.066	0.52193		-77.8533	-77.5079	216.763	1.21892		-77.9019	-77.5585	215.478	-0.0665097		-77.9015
1	0	C	c2h5_rad	-14.2448	-13.9426	189.647	-2.63979		-14.166	-13.8606	191.629	-0.657434		-79.1352	-78.8302	191.395	-0.89125		-79.132	-78.8271	191.331	-0.955566		-79.1139	-78.8123	189.217	-3.06975		-79.1027	-78.8034	187.851	-4.43522		-79.0972	-78.7908	192.226	-0.0605144		-79.0892	-78.7829	192.187	-0.0998016		-79.1411	-78.8346	192.359	0.0722648		-79.1405
0	1	C	carbondioxide	-37.7786	-37.2886	307.467	-4.58919		-37.5743	-37.0821	308.898	-3.15842		-188.643	-188.15	309.753	-2.30313		-188.637	-188.143	309.68	-2.3761		-188.585	-188.093	308.918	-3.13837		-188.559	-188.071	306.278	-5.77838		-188.549	-188.051	312.574	0.517608		-188.546	-188.047	312.695	0.638675		-188.66	-188.162	312.172	0.115783		-188.659
0	1	F	carbonicdifluoride	-70.3406	-69.8513	307.041	2.82707		-69.9201	-69.4401	301.165	-3.04899		-313.109	-312.631	299.966	-4.24764		-313.1	-312.622	299.828	-4.38554		-313.006	-312.532	296.971	-7.24304		-312.974	-312.506	293.634	-10.5801		-312.946	-312.461	304.321	0.10741		-312.944	-312.458	304.57	0.355626		-313.142	-312.657	304.809	0.59492		-313.142
0	1	C	carbonmonoxide	-21.687	-21.1778	319.526	-1.06539		-21.571	-21.0615	319.76	-0.8314		-113.343	-112.834	319.541	-1.05		-113.339	-112.83	319.506	-1.08562		-113.309	-112.802	317.955	-2.63593		-113.291	-112.787	316.026	-4.56572		-113.287	-112.776	320.642	0.0509016		-113.284	-112.774	320.509	-0.0825265		-113.352	-112.842	320.514	-0.077223		-113.352
0	1	F	carbontetrafluoride	-102.939	-102.404	335.397	0.888689		-102.302	-101.769	334.419	-0.0900066		-437.613	-437.088	329.097	-5.41131		-437.601	-437.076	329.191	-5.31732		-437.466	-436.95	323.228	-11.2807		-437.428	-436.917	320.444	-14.0651		-437.382	-436.85	333.749	-0.760001		-437.38	-436.847	334.635	0.126113		-437.662	-437.128	335.186	0.677673		-437.661
1	2	C	cch_rad	-11.7302	-11.3131	261.707	-4.59675		-11.6401	-11.23	257.378	-8.92593		-76.613	-76.1898	265.525	-0.778181		-76.6094	-76.1863	265.472	-0.83141		-76.5919	-76.1732	262.709	-3.59486		-76.5767	-76.1634	259.364	-6.93937		-76.578	-76.1527	266.825	0.521027		-76.5735	-76.1495	266.09	-0.213695		-76.6187	-76.1942	266.351	0.0475974		-76.6182
1	0	C	ch_rad	-6.04509	-5.64844	248.899	-2.50544		-6.01445	-5.61525	250.503	-0.901111		-38.4779	-38.0797	249.894	-1.50952		-38.4763	-38.0782	249.783	-1.62146		-38.4669	-38.0735	246.843	-4.56115		-38.4605	-38.0684	245.985	-5.41941		-38.4605	-38.0636	249.056	-2.34822		-38.4589	-38.0621	249.006	-2.39828		-38.4817	-38.0817	250.973	-0.430523		-38.4815
1	2	C	ch3ch2o_rad	-30.2822	-29.9223	225.849	-3.07886		-30.1143	-29.7516	227.591	-1.33628		-154.368	-154.008	225.7	-3.22794		-154.362	-154.002	225.673	-3.25452		-154.324	-153.968	223.849	-5.07837		-154.305	-153.952	221.822	-7.10513		-154.291	-153.93	227.096	-1.83168		-154.283	-153.921	227.229	-1.69875		-154.382	-154.018	228.689	-0.238539		-154.381
1	0	C	ch3co_rad	-29.1015	-28.7897	195.62	2.76476		-28.943	-28.6302	196.286	3.43135		-153.198	-152.893	190.854	-2.00068		-153.192	-152.887	190.99	-1.86505		-153.153	-152.85	189.977	-2.87838		-153.132	-152.832	188.672	-4.1829		-153.122	-152.814	193.365	0.509653		-153.116	-152.807	193.824	0.968616		-153.211	-152.903	192.939	0.0834175		-153.21
1	2	C	ch3o_rad	-23.4226	-23.0441	237.529	-4.90865		-23.2929	-22.9085	241.194	-1.24381		-115.061	-114.68	238.906	-3.5316		-115.057	-114.676	238.81	-3.62744		-115.027	-114.649	237.235	-5.20241		-115.013	-114.637	235.391	-7.04724		-115.003	-114.621	239.759	-2.67904		-114.998	-114.617	239.644	-2.79329		-115.073	-114.688	242.13	-0.307667		-115.073
1	2	C	cyano_rad	-15.4697	-14.9508	325.576	-0.671797		-15.3792	-14.8716	318.51	-7.73776		-92.7368	-92.2178	325.694	-0.55396		-92.7331	-92.2143	325.544	-0.704039		-92.7136	-92.1976	323.787	-2.46111		-92.6979	-92.1861	321.117	-5.13109		-92.6946	-92.1744	326.418	0.170332		-92.6925	-92.1732	325.863	-0.384939		-92.7437	-92.2238	326.229	-0.0185708		-92.7434
0	1	C	cyanogen	-31.1544	-30.6841	295.114	-1.495		-30.9614	-30.4966	291.628	-4.98035		-185.696	-185.225	295.284	-1.32443		-185.688	-185.217	295.205	-1.4031		-185.648	-185.18	293.602	-3.00689		-185.618	-185.155	290.362	-6.24642		-185.608	-185.135	297.157	0.548876		-185.603	-185.13	296.766	0.157894		-185.708	-185.236	296.602	-0.00675022		-185.708
0	1	C	cyclobutane	-27.3797	-27.003	236.379	-3.216		-27.2313	-26.8547	236.281	-3.31442		-157.169	-156.788	239.234	-0.36119		-157.163	-156.781	239.309	-0.286051		-157.131	-156.753	237.097	-2.49782		-157.111	-156.736	235.375	-4.22019		-157.095	-156.712	240.267	0.672087		-157.082	-156.699	240.199	0.604234		-157.178	-156.796	239.462	-0.132451		-157.177
0	1	C	cyclobutene	-26.1595	-25.8243	210.37	-3.69783		-26.0105	-25.6781	208.561	-5.50719		-155.946	-155.606	213.272	-0.795691		-155.939	-155.599	213.295	-0.772677		-155.907	-155.571	210.547	-3.52093		-155.886	-155.555	208.155	-5.91354		-155.872	-155.531	214.25	0.18154		-155.862	-155.52	214.483	0.414806		-155.955	-155.614	214.093	0.0253581		-155.954
0	1	C	cyclopropane	-20.519	-20.1341	241.532	-2.36517		-20.4086	-20.0303	237.388	-6.5088		-117.867	-117.479	243.246	-0.650936		-117.862	-117.474	243.235	-0.661909		-117.836	-117.453	240.449	-3.44784		-117.82	-117.44	238.448	-5.44909		-117.81	-117.422	243.646	-0.250685		-117.799	-117.41	244.558	0.661001		-117.874	-117.485	243.724	-0.173597		-117.873
0	1	C	cyclopropene	-19.2626	-18.9139	218.807	-2.64037		-19.1491	-18.8039	216.572	-4.87575		-116.607	-116.256	220.515	-0.932989		-116.602	-116.25	220.496	-0.95135		-116.577	-116.229	218.157	-3.29109		-116.56	-116.216	215.726	-5.72194		-116.552	-116.199	221.618	0.170557		-116.544	-116.191	221.236	-0.212225		-116.615	-116.262	221.531	0.0835372		-116.614
0	1	F	difluorinemonoxide	-64.4867	-64.0084	300.09	4.54293		-64.0656	-63.5916	297.436	1.88889		-274.761	-274.298	290.532	-5.01479		-274.753	-274.29	290.688	-4.85947		-274.67	-274.211	287.691	-7.85578		-274.644	-274.19	284.946	-10.6009		-274.618	-274.146	296.494	0.946686		-274.616	-274.141	297.881	2.33359		-274.796	-274.324	296.336	0.789095		-274.796
0	1	F	difluoromethane	-55.4809	-55.0279	284.211	-3.67764		-55.1443	-54.6859	287.694	-0.194598		-239.038	-238.59	281.526	-6.36266		-239.031	-238.583	281.431	-6.45711		-238.955	-238.513	277.01	-10.8785		-238.932	-238.495	274.271	-13.6176		-238.913	-238.46	284.397	-3.49153		-238.909	-238.456	284.288	-3.59986		-239.069	-238.61	287.959	0.0705305		-239.068
0	1	C	dimethylamine	-25.4142	-25.1158	187.234	-12.6677		-25.2871	-24.9717	197.902	-1.99982		-135.141	-134.825	198.01	-1.89145		-135.135	-134.82	197.894	-2.00707		-135.104	-134.791	196.922	-2.97912		-135.087	-134.776	195.126	-4.77564		-135.074	-134.758	198.612	-1.28913		-135.063	-134.746	198.597	-1.30497		-135.151	-134.834	199.312	-0.590015		-135.15
0	1	C	dimethylether	-30.9206	-30.576	216.184	-7.26367		-30.7601	-30.4085	220.655	-2.79305		-155.02	-154.668	220.932	-2.51531		-155.015	-154.663	220.849	-2.59833		-154.975	-154.626	218.937	-4.51054		-154.957	-154.611	217.22	-6.22746		-154.942	-154.588	221.62	-1.82771		-154.932	-154.579	221.732	-1.71547		-155.034	-154.678	223.098	-0.349249		-155.033
0	1	C	ethane	-14.9041	-14.4773	267.822	-4.64135		-14.8241	-14.3931	270.468	-1.99538		-79.8014	-79.3677	272.177	-0.287089		-79.7982	-79.3646	272.103	-0.360517		-79.7806	-79.3494	270.589	-1.87454		-79.7694	-79.3412	268.739	-3.72525		-79.7621	-79.3275	272.714	0.25072		-79.7528	-79.3203	271.411	-1.05228		-79.806	-79.3719	272.422	-0.0412624		-79.8052
0	1	C	ethanedial	-44.5715	-44.2061	229.271	0.277164		-44.3237	-43.959	228.87	-0.124775		-227.866	-227.507	225.267	-3.72706		-227.858	-227.499	225.26	-3.73478		-227.8	-227.443	223.897	-5.09773		-227.771	-227.417	222.188	-6.80661		-227.755	-227.391	228.095	-0.898882		-227.75	-227.385	228.77	-0.224714		-227.887	-227.522	229.029	0.0343265		-227.887
0	1	C	ethanol	-30.9393	-30.577	227.363	-6.84329		-30.7723	-30.4021	232.316	-1.89118		-155.034	-154.666	230.785	-3.42218		-155.029	-154.661	230.713	-3.49342		-154.988	-154.624	228.251	-5.9557		-154.968	-154.608	226.033	-8.17406		-154.956	-154.587	231.862	-2.34507		-154.945	-154.576	231.571	-2.63617		-155.05	-154.677	234.012	-0.195099		-155.049
0	1	C	ethylamine	-25.4263	-25.1058	201.147	-11.1122		-25.2959	-24.9617	209.736	-2.52331		-135.151	-134.816	210.561	-1.69832		-135.146	-134.811	210.491	-1.76752		-135.115	-134.781	209.009	-3.24978		-135.096	-134.766	207.176	-5.08325		-135.085	-134.75	210.704	-1.55502		-135.073	-134.736	211.735	-0.52349		-135.163	-134.825	211.684	-0.574426		-135.162
0	1	C	ethylene	-13.6839	-13.3066	236.792	-5.79363		-13.5993	-13.2273	233.395	-9.19066		-78.5754	-78.1904	241.633	-0.953097		-78.5721	-78.1871	241.615	-0.971207		-78.5535	-78.173	238.768	-3.81773		-78.541	-78.1647	236.145	-6.44085		-78.5378	-78.152	242.068	-0.517458		-78.5309	-78.1449	242.232	-0.353401		-78.5814	-78.1949	242.519	-0.0662647		-78.5809
0	1	C	ethyleneoxide	-29.6891	-29.3224	230.097	-8.89516		-29.5377	-29.1638	234.615	-4.37728		-153.793	-153.417	236.144	-2.84855		-153.788	-153.411	236.151	-2.84119		-153.749	-153.377	233.716	-5.27624		-153.731	-153.362	231.741	-7.25175		-153.716	-153.34	236.484	-2.50869		-153.709	-153.331	237.075	-1.91782		-153.808	-153.428	238.475	-0.517009		-153.807
0	1	F	f2	-48.4964	-47.9334	353.289	-1.75596		-48.1683	-47.6022	355.184	0.138946		-199.577	-199.019	350.595	-4.44957		-199.572	-199.013	350.695	-4.35001		-199.508	-198.956	346.806	-8.23833		-199.491	-198.942	344.119	-10.9255		-199.473	-198.907	355.622	0.577329		-199.472	-198.904	356.753	1.70796		-199.604	-199.037	355.718	0.673439		-199.604
0	1	F	fluoro-ethene	-37.4042	-37.0291	235.341	-2.86709		-37.1694	-36.8003	231.635	-6.57344		-177.849	-177.474	234.999	-3.20904		-177.843	-177.468	234.975	-3.23343		-177.792	-177.423	231.539	-6.66878		-177.771	-177.407	228.626	-9.58191		-177.758	-177.381	236.98	-1.22827		-177.752	-177.375	237.165	-1.04246		-177.867	-177.488	238.245	0.0374426		-177.867
0	1	C	formaldehyde	-22.872	-22.4855	242.519	-4.26851		-22.748	-22.3584	244.521	-2.26633		-114.521	-114.132	244.079	-2.70844		-114.517	-114.128	243.961	-2.82625		-114.487	-114.1	243.168	-3.61915		-114.472	-114.087	241.438	-5.34902		-114.464	-114.073	245.443	-1.34431		-114.46	-114.069	245.386	-1.40121		-114.533	-114.14	246.684	-0.10332		-114.533
0	1	C	formicacid	-38.9537	-38.5472	255.049	-4.59839		-38.741	-38.3323	256.469	-3.17798		-189.805	-189.397	256.06	-3.58697		-189.799	-189.391	255.955	-3.69235		-189.747	-189.34	255.036	-4.61164		-189.723	-189.32	252.471	-7.17611		-189.71	-189.298	258.899	-0.747684		-189.705	-189.292	258.99	-0.657207		-189.825	-189.411	259.746	0.0984911		-189.825
0	1	C	furan	-41.0486	-40.7259	202.452	0.422921		-40.8096	-40.4965	196.488	-5.54084		-230.031	-229.713	199.964	-2.06503		-230.022	-229.703	200.036	-1.99318		-229.969	-229.654	197.541	-4.48804		-229.94	-229.629	195.066	-6.9628		-229.92	-229.597	202.658	0.628343		-229.912	-229.588	203.252	1.22316		-230.049	-229.727	202.186	0.156984		-230.048
0	1	H	h2	-1.16237	-0.569347	372.129	-5.06507		-1.1632	-0.563956	376.03	-1.16405		-1.16974	-0.568938	377.009	-0.184984		-1.1696	-0.569014	376.874	-0.319903		-1.16807	-0.567057	377.143	-0.0511512		-1.16791	-0.567155	376.981	-0.213351		-1.16782	-0.567512	376.702	-0.492776		-1.16503	-0.568852	374.109	-3.08543		-1.17006	-0.569095	377.114	-0.0798755		-1.16967
1	0	C	h2coh_rad	-23.4275	-23.1345	183.913	0.114974		-23.3011	-23.0039	186.513	2.71474		-115.072	-114.783	181.167	-2.63044		-115.068	-114.779	181.173	-2.62498		-115.034	-114.746	180.579	-3.21869		-115.019	-114.734	178.919	-4.87861		-115.013	-114.721	183.057	-0.740833		-115.007	-114.714	183.941	0.143144		-115.085	-114.792	183.91	0.112223		-115.085
1	0	C	hco_rad	-22.2303	-21.8758	222.408	3.47556		-22.1102	-21.7545	223.216	4.2828		-113.879	-113.534	216.759	-2.17426		-113.875	-113.53	216.826	-2.1065		-113.845	-113.501	216.024	-2.90853		-113.829	-113.486	215.14	-3.79256		-113.823	-113.474	218.658	-0.275211		-113.82	-113.471	219.341	0.408617		-113.89	-113.542	218.845	-0.0877354		-113.89
0	1	N	hydrazine	-22.2103	-21.8741	210.973	-14.5461		-22.1066	-21.7502	223.646	-1.8727		-111.871	-111.517	222.138	-3.38035		-111.867	-111.513	222.235	-3.28358		-111.836	-111.486	219.712	-5.80705		-111.82	-111.473	217.776	-7.74224		-111.815	-111.461	221.664	-3.85412		-111.805	-111.447	224.223	-1.29569		-111.886	-111.528	224.459	-1.05944		-111.885
0	1	C	hydrogencyanide	-16.1673	-15.6691	312.659	-1.35436		-16.0735	-15.5856	306.159	-7.85452		-93.4402	-92.9416	312.845	-1.1685		-93.4361	-92.9378	312.726	-1.28764		-93.4147	-92.9189	311.118	-2.89504		-93.3982	-92.9072	308.087	-5.92669		-93.3963	-92.8959	314.044	0.0309299		-93.3919	-92.8928	313.188	-0.825317		-93.4476	-92.9471	314.028	0.0148458		-93.4471
0	1	F	hydrogenfluoride	-24.911	-24.3455	354.84	-19.8527		-24.7596	-24.1725	368.389	-6.30288		-100.464	-99.879	367.31	-7.38227		-100.462	-99.8768	367.144	-7.54796		-100.421	-99.846	360.663	-14.0291		-100.41	-99.8393	357.966	-16.726		-100.411	-99.8229	368.761	-5.93183		-100.407	-99.8193	368.911	-5.78134		-100.485	-99.8887	374.189	-0.502867		-100.485
0	1	O	hydrogenperoxide	-33.2027	-32.8133	244.346	-16.6194		-33.011	-32.5991	258.433	-2.5325		-151.588	-151.183	254.628	-6.3375		-151.584	-151.178	254.617	-6.3485		-151.538	-151.139	250.602	-10.3637		-151.519	-151.123	248.258	-12.7076		-151.51	-151.104	254.81	-6.15588		-151.504	-151.096	255.652	-5.31383		-151.61	-151.197	259.079	-1.88682		-151.609
0	1	C	isobutane	-28.6158	-28.2275	243.647	-3.66054		-28.4606	-28.0713	244.247	-3.06024		-158.406	-158.013	246.215	-1.09298		-158.399	-158.007	246.193	-1.11458		-158.366	-157.977	244.062	-3.24541		-158.345	-157.959	242.267	-5.04108		-158.33	-157.936	246.822	-0.485721		-158.314	-157.922	246.306	-1.00141		-158.414	-158.021	246.566	-0.741151		-158.413
0	1	C	isopropanol	-37.801	-37.4472	221.997	-5.82239		-37.5945	-37.2354	225.373	-2.44581		-194.341	-193.983	224.645	-3.17408		-194.334	-193.976	224.595	-3.22392		-194.286	-193.933	221.854	-5.96536		-194.261	-193.911	219.634	-8.18563		-194.245	-193.885	225.973	-1.8463		-194.231	-193.871	226.091	-1.72807		-194.358	-193.996	227.59	-0.22915		-194.357
1	0	C	isopropyl_rad	-21.1071	-20.8365	169.799	-1.5307		-20.9894	-20.7157	171.756	0.426082		-118.444	-118.172	170.909	-0.421181		-118.439	-118.167	170.893	-0.437079		-118.413	-118.144	168.821	-2.50865		-118.397	-118.131	167.447	-3.88286		-118.387	-118.113	172.007	0.677037		-118.376	-118.102	172.104	0.774151		-118.452	-118.178	171.767	0.436743		-118.451
0	1	C	ketene	-28.5288	-28.1788	219.579	-2.82979		-28.3611	-28.0134	218.209	-4.20001		-152.628	-152.277	220.329	-2.07975		-152.622	-152.27	220.338	-2.07107		-152.582	-152.234	218.586	-3.82257		-152.56	-152.215	216.197	-6.21248		-152.552	-152.198	222.501	0.0921237		-152.546	-152.191	222.762	0.352504		-152.64	-152.286	222.422	0.0125065		-152.64
0	1	Li	li2	-0.418333	-0.236211	114.283	-5.88103		-0.418641	-0.238746	112.886	-7.27832		-14.9968	-14.8051	120.312	0.147123		-14.9941	-14.8025	120.22	0.0551804		-14.9952	-14.8027	120.811	0.646539		-14.9922	-14.8002	120.487	0.322192		-14.9908	-14.7985	120.638	0.473804		-14.9906	-14.7983	120.672	0.508061		-14.9974	-14.8058	120.263	0.0985326		-14.9972
0	1	Li	li2c2	-11.7139	-11.4731	151.1	-6.88451		-11.6432	-11.4054	149.231	-8.75382		-91.1797	-90.9285	157.617	-0.367615		-91.1729	-90.9219	157.484	-0.501197		-91.1575	-90.9101	155.19	-2.79494		-91.1352	-90.8921	152.582	-5.40255		-91.1356	-90.8872	155.847	-2.1376		-91.1322	-90.885	155.105	-2.88035		-91.1836	-90.9328	157.367	-0.618197		-91.1821
0	1	Li	li2nh	-10.9826	-10.7951	117.657	-10.0508		-10.9285	-10.7373	119.993	-7.71509		-70.3879	-70.1851	127.287	-0.421325		-70.3825	-70.1799	127.104	-0.604107		-70.3692	-70.1693	125.45	-2.25799		-70.352	-70.155	123.63	-4.07799		-70.3458	-70.1503	122.643	-5.06521		-70.3418	-70.1469	122.276	-5.43233		-70.3868	-70.1878	124.895	-2.81334		-70.3852
0	1	Li	li2o	-16.5586	-16.3291	143.979	-12.5702		-16.459	-16.2231	148.035	-8.5137		-90.3322	-90.0826	156.634	0.0850248		-90.3256	-90.0766	156.235	-0.314096		-90.3059	-90.0584	155.321	-1.22776		-90.2859	-90.0418	153.14	-3.40842		-90.2799	-90.0352	153.501	-3.04816		-90.2785	-90.0343	153.235	-3.31391		-90.3331	-90.0867	154.599	-1.95001		-90.3317
0	1	Li	li2o2	-32.5932	-32.3404	158.656	-5.36235		-32.3985	-32.1481	157.149	-6.86965		-165.557	-165.296	163.707	-0.311351		-165.548	-165.288	163.14	-0.878633		-165.505	-165.248	161.445	-2.57335		-165.476	-165.223	158.552	-5.46622		-165.467	-165.208	162.101	-1.9175		-165.464	-165.206	162.164	-1.8543		-165.567	-165.306	163.909	-0.109968		-165.565
0	1	Li	lich3	-7.64531	-7.381	165.858	-5.97697		-7.61049	-7.34439	166.975	-4.85921		-47.3848	-47.1113	171.676	-0.158201		-47.3816	-47.1078	171.823	-0.0115747		-47.3715	-47.1002	170.23	-1.60435		-47.3625	-47.0935	168.787	-3.04786		-47.3612	-47.0865	172.354	0.519044		-47.3552	-47.0798	172.859	1.024		-47.3878	-47.1138	171.931	0.096125		-47.3868
0	1	Li	linh2	-11.3615	-11.1114	156.925	-12.3765		-11.308	-11.0501	161.851	-7.45073		-63.48	-63.2133	167.399	-1.9027		-63.4764	-63.2098	167.29	-2.01184		-63.4595	-63.1979	164.14	-5.16236		-63.4459	-63.1876	162.056	-7.24629		-63.4426	-63.1823	163.293	-6.00863		-63.4371	-63.1769	163.278	-6.02352		-63.4846	-63.2176	167.565	-1.73638		-63.4836
0	1	Li	lioh	-16.9098	-16.5926	199.043	-17.4253		-16.8167	-16.4841	208.709	-7.75896		-83.3999	-83.0567	215.339	-1.12895		-83.3953	-83.053	214.831	-1.63707		-83.3674	-83.0311	211.04	-5.42868		-83.3507	-83.0198	207.62	-8.84801		-83.3495	-83.0122	211.638	-4.83071		-83.3464	-83.0087	211.918	-4.55064		-83.4069	-83.0639	215.239	-1.22954		-83.4062
0	1	Li	lithiumfluoride	-24.605	-24.2086	248.732	-23.4149		-24.4485	-24.041	255.753	-16.3933		-107.458	-107.025	271.87	-0.276181		-107.452	-107.021	270.97	-1.17686		-107.416	-106.991	266.58	-5.56638		-107.4	-106.981	263.033	-9.11319		-107.393	-106.966	268.312	-3.83419		-107.393	-106.965	268.178	-3.96885		-107.467	-107.034	271.638	-0.508271		-107.466
0	1	Li	lithiumhydride	-0.781454	-0.486576	185.039	-3.45405		-0.782437	-0.486794	185.519	-2.97447		-8.07227	-7.77191	188.479	-0.0145185		-8.07042	-7.7702	188.391	-0.102735		-8.06946	-7.76879	188.678	0.185036		-8.06645	-7.76645	188.25	-0.243004		-8.06793	-7.76679	188.971	0.477763		-8.06738	-7.76599	189.13	0.636508		-8.07266	-7.77229	188.483	-0.0107457		-8.07225
0	1	C	methane	-8.0501	-7.55007	313.771	-6.25306		-8.00968	-7.50685	315.531	-4.49287		-40.5014	-39.9922	319.529	-0.494797		-40.4999	-39.9909	319.396	-0.628405		-40.4897	-39.9823	318.394	-1.63012		-40.4836	-39.9791	316.573	-3.45086		-40.4805	-39.971	319.747	-0.276583		-40.4742	-39.967	318.279	-1.74506		-40.5039	-39.9943	319.744	-0.28014		-40.5034
0	1	C	methoxy-ethane	-37.7822	-37.4464	210.728	-6.57393		-37.582	-37.2393	215.028	-2.27335		-194.328	-193.985	215.115	-2.18623		-194.32	-193.978	215.05	-2.25136		-194.273	-193.934	212.879	-4.42206		-194.25	-193.913	211.127	-6.17439		-194.231	-193.886	216.048	-1.2531		-194.218	-193.874	216.027	-1.27456		-194.343	-193.997	217.057	-0.244628		-194.341
1	0	C	methyl_rad	-7.38285	-7.03029	221.238	-4.92879		-7.34479	-6.98987	222.715	-3.45094		-39.827	-39.4686	224.89	-1.2764		-39.8254	-39.4671	224.837	-1.32981		-39.8148	-39.46	222.63	-3.53674		-39.8086	-39.4559	221.33	-4.83629		-39.8076	-39.449	225.042	-1.12481		-39.8024	-39.4442	224.809	-1.35774		-39.8309	-39.4706	226.074	-0.092751		-39.8305
0	1	C	methylalcohol	-24.0772	-23.699	237.304	-8.71335		-23.9506	-23.5637	242.806	-3.21171		-115.726	-115.341	241.902	-4.11536		-115.722	-115.337	241.797	-4.2204		-115.689	-115.308	239.641	-6.3765		-115.675	-115.296	237.533	-8.48439		-115.666	-115.28	242.596	-3.42113		-115.659	-115.272	242.571	-3.44672		-115.74	-115.349	245.566	-0.451843		-115.74
0	1	C	methylamine	-18.5662	-18.2385	205.67	-12.7985		-18.476	-18.1308	216.616	-1.85246		-95.8454	-95.4998	216.899	-1.56924		-95.842	-95.4966	216.728	-1.73982		-95.818	-95.4749	215.279	-3.18906		-95.8045	-95.4643	213.483	-4.98543		-95.7978	-95.4529	216.387	-2.08145		-95.7885	-95.4428	216.921	-1.54712		-95.8556	-95.5082	218	-0.468568		-95.8548
0	1	C	methylene_singlet	-6.68247	-6.3084	234.734	-7.16117		-6.65382	-6.27263	239.198	-2.69775		-39.1256	-38.7417	240.873	-1.02203		-39.124	-38.7404	240.734	-1.16169		-39.112	-38.7323	238.244	-3.65135		-39.1053	-38.7278	236.923	-4.97222		-39.1058	-38.7235	239.913	-1.98214		-39.1031	-38.7203	240.216	-1.6796		-39.1296	-38.7448	241.51	-0.38489		-39.1293
2	1	C	methylene_triplet	-6.70684	-6.33497	233.355	-4.51741		-6.66969	-6.29607	234.453	-3.4196		-39.1424	-38.7655	236.535	-1.33766		-39.1409	-38.764	236.49	-1.38224		-39.1307	-38.7573	234.365	-3.50809		-39.1251	-38.7533	233.266	-4.60683		-39.1247	-38.7469	237.099	-0.773425		-39.1214	-38.7437	237.014	-0.858642		-39.1466	-38.7676	237.804	-0.0686983		-39.1463
0	1	C	methylenecyclopropane	-26.1506	-25.8066	215.871	-4.27571		-25.9989	-25.6576	214.125	-6.02226		-155.939	-155.589	219.205	-0.942007		-155.932	-155.582	219.171	-0.975909		-155.898	-155.553	216.207	-3.9402		-155.877	-155.536	213.8	-6.3467		-155.864	-155.514	220.023	-0.1234		-155.854	-155.503	220.231	0.0839775		-155.948	-155.598	220.13	-0.0171817		-155.947
0	1	C	methylformate	-45.7953	-45.4094	242.162	-5.18387		-45.5499	-45.1601	244.552	-2.79388		-229.097	-228.707	244.408	-2.93823		-229.089	-228.699	244.232	-3.11421		-229.029	-228.643	242.772	-4.57394		-229.002	-228.617	241.03	-6.3157		-228.982	-228.589	246.543	-0.802696		-228.975	-228.581	247.06	-0.285467		-229.117	-228.723	247.371	0.025488		-229.116
0	1	C	methylnitrite	-49.3855	-48.9928	246.442	0.726913		-49.1222	-48.7313	245.309	-0.406247		-245.067	-244.68	242.715	-3.00063		-245.058	-244.671	242.701	-3.01486		-244.996	-244.609	242.72	-2.99589		-244.967	-244.583	240.626	-5.08914		-244.944	-244.552	245.926	0.210836		-244.937	-244.544	246.524	0.808107		-245.089	-244.697	245.734	0.0183074		-245.088
0	1	N	n2	-19.8895	-19.3328	349.308	-4.89679		-19.7832	-19.2252	350.155	-4.04915		-109.554	-108.993	352.319	-1.88567		-109.55	-108.989	352.184	-2.01985		-109.524	-108.963	351.925	-2.27884		-109.506	-108.949	349.847	-4.35761		-109.499	-108.938	351.588	-2.61655		-109.497	-108.937	351.461	-2.74314		-109.563	-109	353.423	-0.781255		-109.563
2	3	N	nh_rad	-10.4157	-9.92214	309.709	-11.3037		-10.3575	-9.852	317.222	-3.79053		-55.2236	-54.7165	318.21	-2.80282		-55.2217	-54.7149	318.053	-2.9598		-55.2094	-54.7032	317.681	-3.33213		-55.2015	-54.6978	316.117	-4.89599		-55.1978	-54.6904	318.369	-2.64365		-55.1958	-54.6884	318.361	-2.65211		-55.2308	-54.7201	320.502	-0.510665		-55.2307
1	2	N	nh2_rad	-11.0579	-10.6274	270.155	-11.806		-11.0046	-10.5625	277.468	-4.4934		-55.8794	-55.4343	279.278	-2.68285		-55.8775	-55.4328	279.086	-2.87495		-55.8621	-55.4192	277.91	-4.05085		-55.8537	-55.4132	276.429	-5.53265		-55.8508	-55.4075	278.18	-3.78152		-55.8467	-55.4018	279.192	-2.76933		-55.8877	-55.4396	281.176	-0.785199		-55.8874
1	0	O	nitricoxide	-25.9027	-25.5081	247.632	17.4809		-25.76	-25.3795	238.756	8.60492		-129.93	-129.566	228.125	-2.02653		-129.926	-129.562	228.021	-2.13038		-129.892	-129.526	229.609	-0.542295		-129.875	-129.51	229.057	-1.09449		-129.864	-129.497	230.559	0.407747		-129.863	-129.494	231.329	1.17779		-129.942	-129.576	230.049	-0.102571		-129.942
0	1	F	nitrogentrifluoride	-82.7283	-82.2381	307.628	1.86309		-82.2083	-81.7196	306.637	0.872372		-354.202	-353.726	298.924	-6.8408		-354.191	-353.715	298.869	-6.89531		-354.086	-353.614	295.902	-9.86253		-354.053	-353.586	292.443	-13.3214		-354.017	-353.53	305.938	0.173251		-354.014	-353.525	307.071	1.30592		-354.247	-353.758	306.752	0.986906		-354.246
0	1	C	nitro-methane	-49.3871	-48.992	247.923	-5.01238		-49.123	-48.723	251.002	-1.93351		-245.067	-244.671	248.758	-4.17713		-245.059	-244.663	248.665	-4.26986		-244.995	-244.6	247.446	-5.48941		-244.966	-244.576	245.179	-7.75619		-244.945	-244.544	251.524	-1.41135		-244.938	-244.537	251.978	-0.957041		-245.092	-244.689	253.068	0.133166		-245.091
0	1	O	nitrousoxide	-35.8571	-35.3966	288.943	-5.60854		-35.6634	-35.1995	291.1	-3.45163		-184.726	-184.261	292.088	-2.46389		-184.719	-184.254	292.049	-2.50286		-184.671	-184.206	292.145	-2.40675		-184.648	-184.185	290.289	-4.26274		-184.633	-184.163	294.63	0.0786796		-184.631	-184.16	295.304	0.752714		-184.742	-184.272	294.481	-0.0709195		-184.741
1	0	O	no2	-41.9182	-41.4907	268.288	8.21368		-41.6882	-41.2637	266.38	6.3051		-205.15	-204.741	256.472	-3.60265		-205.143	-204.734	256.453	-3.62125		-205.088	-204.676	258.301	-1.77363		-205.064	-204.655	256.897	-3.17816		-205.045	-204.629	260.966	0.890993		-205.043	-204.626	261.806	1.73095		-205.17	-204.755	260.317	0.241989		-205.169
2	1	O	o2	-31.9885	-31.5018	305.397	13.2947		-31.7987	-31.327	295.945	3.84233		-150.375	-149.912	290.104	-1.9991		-150.37	-149.908	289.901	-2.20206		-150.328	-149.864	291.308	-0.794583		-150.312	-149.85	289.854	-2.24832		-150.296	-149.828	293.485	1.3826		-150.294	-149.825	294.261	2.15857		-150.39	-149.924	292.227	0.124439		-150.389
1	2	O	oh_rad	-16.5637	-16.0978	292.354	-14.0326		-16.4649	-15.9858	300.608	-5.77882		-75.7457	-75.2657	301.18	-5.20669		-75.7435	-75.2638	300.999	-5.38755		-75.7205	-75.2441	298.983	-7.40416		-75.7102	-75.237	296.959	-9.42808		-75.7077	-75.2268	301.79	-4.59691		-75.7051	-75.2239	301.94	-4.44626		-75.7592	-75.2719	305.829	-0.557302		-75.7591
0	1	O	ozone	-47.9174	-47.4574	288.674	-0.286394		-47.6429	-47.1855	287.003	-1.95737		-225.508	-225.054	284.841	-4.11991		-225.5	-225.047	284.699	-4.26173		-225.438	-224.984	285.066	-3.89527		-225.413	-224.962	282.902	-6.05914		-225.39	-224.931	288.476	-0.485139		-225.387	-224.926	289.545	0.584167		-225.532	-225.071	288.836	-0.125039		-225.531
0	1	C	propane	-21.7597	-21.361	250.217	-4.1925		-21.6417	-21.2383	253.146	-1.26337		-119.103	-118.698	254.076	-0.333548		-119.098	-118.694	254.008	-0.401577		-119.073	-118.671	252.238	-2.17127		-119.057	-118.658	250.497	-3.91225		-119.046	-118.64	254.679	0.26923		-119.033	-118.629	253.475	-0.934462		-119.11	-118.705	254.377	-0.0324653		-119.109
0	1	C	propene	-20.5456	-20.2006	216.481	-5.15726		-20.425	-20.0813	215.63	-6.00909		-117.883	-117.531	220.821	-0.817706		-117.878	-117.527	220.788	-0.850746		-117.852	-117.505	218.07	-3.56835		-117.835	-117.491	215.604	-6.03509		-117.827	-117.474	221.559	-0.0795989		-117.817	-117.464	221.442	-0.196606		-117.891	-117.538	221.717	0.0780216		-117.89
0	1	C	propyne	-19.3106	-18.9469	228.193	-4.65017		-19.1803	-18.8199	226.162	-6.68048		-116.646	-116.277	231.723	-1.11978		-116.641	-116.271	231.713	-1.13013		-116.614	-116.249	228.987	-3.85591		-116.594	-116.234	225.781	-7.06153		-116.591	-116.219	233.252	0.409695		-116.581	-116.211	232.44	-0.402932		-116.654	-116.283	232.888	0.0453339		-116.653
0	1	C	pyridine	-41.2262	-40.8976	206.203	-7.01505		-40.9853	-40.6481	211.618	-1.59958		-248.275	-247.938	211.11	-2.10738		-248.264	-247.928	211.086	-2.13157		-248.213	-247.879	209.881	-3.3371		-248.181	-247.85	207.796	-5.42202		-248.158	-247.818	213.868	0.650829		-248.149	-247.808	214.401	1.18346		-248.292	-247.952	213.216	-0.00177449		-248.29
0	1	C	pyrrole	-35.5581	-35.2653	183.736	-3.87009		-35.3478	-35.0569	182.486	-5.12048		-210.161	-209.866	185.028	-2.57797		-210.152	-209.857	185.097	-2.50966		-210.104	-209.815	181.819	-5.7875		-210.077	-209.791	179.471	-8.13504		-210.062	-209.764	187.001	-0.604847		-210.052	-209.753	187.743	0.136651		-210.176	-209.877	187.474	-0.132626		-210.175
0	1	C	spiropentane	-32.9896	-32.6478	214.516	-2.28734		-32.8091	-32.473	210.899	-5.90395		-195.231	-194.887	215.816	-0.986543		-195.222	-194.878	215.827	-0.976043		-195.181	-194.842	212.64	-4.16318		-195.156	-194.821	210.579	-6.22375		-195.138	-194.794	216.238	-0.564968		-195.124	-194.777	217.538	0.734718		-195.242	-194.897	216.369	-0.433782		-195.24
1	0	C	t-butyl_rad	-27.9687	-27.7201	156	-2.09125		-27.8132	-27.5593	159.366	1.27475		-157.752	-157.501	157.407	-0.684304		-157.745	-157.494	157.412	-0.67883		-157.712	-157.465	155.1	-2.99161		-157.692	-157.447	153.733	-4.35778		-157.676	-157.423	158.827	0.735945		-157.663	-157.41	158.73	0.639132		-157.761	-157.509	158.344	0.252779		-157.76
0	1	F	tetrafluoroethylene	-108.534	-108.148	242.203	9.63649		-107.854	-107.486	230.834	-1.7327		-475.648	-475.287	226.32	-6.2467		-475.634	-475.274	226.294	-6.27309		-475.488	-475.133	222.771	-9.79571		-475.445	-475.095	219.372	-13.195		-475.398	-475.028	232.337	-0.229532		-475.394	-475.023	232.748	0.180919		-475.701	-475.329	233.304	0.737295		-475.7
0	1	C	trans_butane	-28.6153	-28.2314	240.877	-3.75133		-28.4594	-28.0729	242.525	-2.10323		-158.405	-158.015	244.509	-0.118632		-158.398	-158.009	244.423	-0.205369		-158.366	-157.979	242.479	-2.14941		-158.345	-157.961	240.754	-3.87358		-158.329	-157.938	245.109	0.480822		-158.313	-157.925	243.982	-0.645606		-158.414	-158.023	244.823	0.195308		-158.412
0	1	F	trifluoro-acetonitrile	-94.1854	-93.6881	312.076	2.09908		-93.6015	-93.1146	305.568	-4.40877		-430.569	-430.082	305.952	-4.0247		-430.555	-430.068	305.94	-4.03623		-430.433	-429.952	301.966	-8.01022		-430.389	-429.913	298.737	-11.2395		-430.348	-429.854	309.785	-0.191184		-430.343	-429.849	309.845	-0.131491		-430.612	-430.117	310.506	0.529918		-430.611
0	1	B	trifluoro-borane	-75.9115	-75.3817	332.482	0.824817		-75.4533	-74.9263	330.676	-0.981496		-324.656	-324.133	328.395	-3.2624		-324.647	-324.123	328.529	-3.12824		-324.541	-324.028	322.186	-9.47098		-324.509	-324.001	319.204	-12.4535		-324.481	-323.954	331.04	-0.617401		-324.475	-323.947	331.375	-0.282552		-324.69	-324.161	332	0.342962		-324.689
0	1	F	trifluoro-methane	-79.2131	-78.7117	314.596	-2.17948		-78.7264	-78.222	316.489	-0.286253		-338.328	-337.833	310.531	-6.2439		-338.318	-337.824	310.479	-6.29658		-338.212	-337.724	305.69	-11.0858		-338.181	-337.699	302.998	-13.7771		-338.15	-337.649	314.799	-1.97666		-338.148	-337.645	315.109	-1.66668		-338.368	-337.863	317.201	0.426209		-338.368
0	1	C	trimethylamine	-32.2635	-31.9828	176.125	-12.5511		-32.1003	-31.8037	186.164	-2.51185		-174.438	-174.141	186.158	-2.51769		-174.431	-174.134	186.087	-2.58847		-174.392	-174.098	184.737	-3.9385		-174.371	-174.079	183.145	-5.53129		-174.353	-174.055	187.006	-1.66999		-174.339	-174.041	186.912	-1.76357		-174.449	-174.15	187.67	-1.00581		-174.448
0	1	B	Trimethylborane	-25.1598	-24.7882	233.171	-2.30757		-25.0233	-24.6523	232.762	-2.71663		-144.56	-144.185	235.123	-0.356306		-144.554	-144.179	235.096	-0.382778		-144.523	-144.153	232.631	-2.848		-144.502	-144.136	229.777	-5.70179		-144.491	-144.115	236.128	0.649215		-144.476	-144.101	235.325	-0.154065		-144.568	-144.193	235.541	0.0621166		-144.567
0	1	O	water	-17.2387	-16.7964	277.548	-15.7675		-17.1469	-16.6896	286.976	-6.33973		-76.4368	-75.9801	286.569	-6.74701		-76.4346	-75.9782	286.385	-6.93053		-76.408	-75.9559	283.686	-9.63008		-76.3969	-75.9484	281.425	-11.8908		-76.3961	-75.9384	287.211	-6.10532		-76.3905	-75.9324	287.439	-5.87645		-76.4525	-75.9865	292.462	-0.853534		-76.4523
0	1	Cl	1-chloro-propane	-36.2108	-35.8307	238.517	0.179268		-35.9302	-35.5505	238.253	-0.0854441		-578.726	-578.345	238.949	0.610799		-578.715	-578.334	238.96	0.62219		-578.674	-578.297	236.965	-1.37312		-578.636	-578.261	235.485	-2.85333		-578.652	-578.272	238.728	0.390208		-578.64	-578.26	238.559	0.220456		-578.738	-578.358	238.521	0.182445		-578.737
0	1	Cl	acetylchloride	-44.2145	-43.8187	248.374	2.40463		-43.8889	-43.4971	245.837	-0.13213		-613.485	-613.093	245.758	-0.210733		-613.474	-613.082	245.688	-0.28071		-613.42	-613.03	244.505	-1.46407		-613.378	-612.991	242.52	-3.44928		-613.394	-613	247.457	1.48771		-613.388	-612.993	247.747	1.77799		-613.504	-613.111	246.537	0.567894		-613.503
2	1	Al	al2	-3.90848	-3.67418	147.025	1.4948		-3.89538	-3.66313	145.735	0.204703		-484.803	-484.572	145.537	0.00631389		-484.795	-484.563	145.518	-0.0128115		-484.779	-484.547	145.816	0.286004		-484.75	-484.517	146.049	0.51825		-484.791	-484.558	146.157	0.626811		-484.791	-484.558	146.195	0.664444		-484.81	-484.577	146.098	0.567642		-484.81
0	1	Al	al2h6	-7.54107	-7.16753	234.402	3.11488		-7.52553	-7.15584	231.983	0.696095		-488.455	-488.087	231.188	-0.0989547		-488.446	-488.078	231.039	-0.247753		-488.423	-488.054	231.552	0.265755		-488.389	-488.021	230.986	-0.300743		-488.436	-488.067	231.794	0.50695		-488.434	-488.065	231.13	-0.15712		-488.465	-488.096	231.357	0.0698939		-488.464
0	1	Al	al2o3	-52.2118	-51.8785	209.157	-5.47135		-51.9542	-51.6169	211.646	-2.98233		-710.732	-710.394	211.952	-2.67634		-710.715	-710.378	211.817	-2.81147		-710.624	-710.291	208.959	-5.66924		-710.556	-710.223	208.597	-6.03151		-710.594	-710.255	212.231	-2.3978		-710.587	-710.248	212.303	-2.32537		-710.768	-710.426	214.688	0.0590491		-710.767
0	1	Al	Al3P3H6	-29.2742	-29.0029	170.265	-0.817059		-29.0994	-28.8303	168.851	-2.23068		-1755.1	-1754.82	171.315	0.233384		-1755.07	-1754.8	171.318	0.235744		-1755	-1754.73	169.87	-1.2123		-1754.89	-1754.63	168.567	-2.51521		-1755.04	-1754.77	170.537	-0.54446		-1755.03	-1754.76	170.297	-0.785347		-1755.12	-1754.85	171.605	0.523267		-1755.12
0	1	Al	alcl	-17.0983	-16.7468	220.587	8.7868		-16.9305	-16.5901	213.646	1.84562		-702.721	-702.382	212.601	0.799998		-702.711	-702.373	212.564	0.763607		-702.686	-702.346	213.013	1.21224		-702.648	-702.309	212.925	1.12492		-702.699	-702.359	213.574	1.77339		-702.699	-702.358	213.808	2.007		-702.73	-702.392	212.46	0.659804		-702.73
0	1	Al	alh	-2.54004	-2.24317	186.285	-0.222696		-2.53321	-2.23726	185.714	-0.794079		-242.99	-242.693	186.427	-0.0808648		-242.986	-242.689	186.327	-0.180656		-242.977	-242.681	185.774	-0.734406		-242.961	-242.665	185.853	-0.654954		-242.984	-242.687	186.243	-0.264866		-242.983	-242.686	186.18	-0.327807		-242.994	-242.697	186.261	-0.24707		-242.994
0	1	Al	alh2ph2	-10.9105	-10.5812	206.606	-4.63195		-10.8551	-10.5193	210.709	-0.528019		-586.191	-585.855	211.216	-0.0216569		-586.184	-585.847	211.185	-0.0522693		-586.156	-585.822	209.567	-1.6706		-586.12	-585.787	209.065	-2.17292		-586.169	-585.833	210.703	-0.533999		-586.167	-585.831	210.534	-0.703668		-586.2	-585.864	210.858	-0.379524		-586.2
0	1	Al	alh3	-3.74916	-3.34805	251.702	1.71088		-3.73936	-3.34005	250.571	0.580478		-244.202	-243.804	249.933	-0.0577452		-244.198	-243.8	249.723	-0.268196		-244.187	-243.789	249.887	-0.103438		-244.169	-243.772	249.409	-0.581394		-244.193	-243.795	250.139	0.148623		-244.192	-243.794	249.542	-0.448567		-244.207	-243.809	249.978	-0.0127769		-244.207
0	1	Al	al-ph2	-25.2313	-24.9279	190.362	-0.995307		-25.086	-24.7813	191.175	-0.181955		-1270.17	-1269.86	191.71	0.353172		-1270.15	-1269.85	191.736	0.378748		-1270.09	-1269.79	190.001	-1.35593		-1270.02	-1269.72	188.99	-2.36688		-1270.12	-1269.81	191.442	0.0852051		-1270.12	-1269.81	191.267	-0.0896016		-1270.19	-1269.88	191.508	0.15109		-1270.19
1	0	Al	als	-12.1999	-11.8429	224.011	8.74147		-12.0982	-11.7494	218.877	3.60767		-640.654	-640.31	215.891	0.621193		-640.646	-640.302	215.818	0.548559		-640.62	-640.276	216.13	0.860689		-640.584	-640.24	216.209	0.939269		-640.634	-640.289	216.513	1.24383		-640.633	-640.288	216.6	1.33074		-640.662	-640.319	215.663	0.393234		-640.662
0	1	Al	al-sih3	-18.2151	-17.9013	196.916	-1.45195		-18.8703	-18.5542	198.343	-0.0255444		-1116.32	-1116	198.475	0.106919		-1116.3	-1115.98	198.403	0.0343071		-1116.25	-1115.93	198.625	0.256549		-1116.18	-1115.87	197.193	-1.17539		-1116.27	-1115.95	200.99	2.62132		-1116.27	-1115.95	200.755	2.38631		-1116.33	-1116.01	199.105	0.736977		-1116.33
0	1	Al	aluminumtrichloride	-47.3117	-46.9047	255.423	9.196		-46.8403	-46.4461	247.399	1.17191		-1623.31	-1622.92	247.584	1.35739		-1623.29	-1622.89	247.657	1.43018		-1623.23	-1622.83	246.724	0.497253		-1623.14	-1622.75	245.84	-0.38698		-1623.25	-1622.86	248.005	1.77767		-1623.25	-1622.86	248.313	2.08563		-1623.33	-1622.94	247.424	1.19659		-1623.33
0	1	Al	aluminumtrifluoride	-75.1467	-74.663	303.527	-7.06735		-74.7118	-74.2192	309.095	-1.49936		-542.298	-541.809	306.461	-4.13309		-542.284	-541.796	306.329	-4.26524		-542.17	-541.693	298.777	-11.817		-542.121	-541.648	297.405	-13.1893		-542.119	-541.629	307.225	-3.36958		-542.116	-541.626	307.526	-3.06837		-542.341	-541.846	310.814	0.219427		-542.341
0	1	Cl	becl2	-31.3118	-30.8888	265.416	4.4516		-30.9792	-30.5625	261.463	0.498756		-935.329	-934.912	261.893	0.929027		-935.317	-934.899	261.921	0.956311		-935.283	-934.867	261.234	0.269924		-935.236	-934.822	259.8	-1.16445		-935.282	-934.866	260.978	0.0132239		-935.28	-934.863	261.413	0.448615		-935.34	-934.923	261.462	0.49776		-935.339
0	1	S	bes	-11.243	-10.902	213.961	2.50737		-11.1376	-10.8029	210.018	-1.43478		-412.914	-412.577	211.839	0.386141		-412.909	-412.572	211.743	0.28974		-412.893	-412.556	211.704	0.250774		-412.868	-412.533	209.98	-1.47335		-412.885	-412.552	208.809	-2.64381		-412.884	-412.551	209.117	-2.33632		-412.918	-412.582	211.019	-0.434561		-412.918
0	1	S	besh	-22.7658	-22.4165	219.223	2.35592		-22.5502	-22.2051	216.588	-0.278421		-812.449	-812.103	217.06	0.193662		-812.44	-812.094	217.053	0.18591		-812.401	-812.056	216.493	-0.373281		-812.358	-812.015	215.045	-1.82159		-812.401	-812.058	215.699	-1.16745		-812.399	-812.055	215.783	-1.08391		-812.458	-812.112	216.984	0.117454		-812.457
0	1	Si	besi2	-8.02717	-7.74443	177.421	-0.293921		-8.65674	-8.37695	175.574	-2.14086		-593.642	-593.358	177.738	0.0232435		-593.634	-593.351	177.68	-0.0340383		-593.607	-593.324	178.039	0.324349		-593.573	-593.29	177.095	-0.619161		-593.613	-593.328	178.539	0.824452		-593.612	-593.327	178.536	0.821983		-593.648	-593.365	178	0.285632		-593.648
0	1	S	C2H6O2S	-57.0248	-56.6885	211.022	-23.0062		-56.7115	-56.3598	220.709	-13.3187		-628.475	-628.108	230.273	-3.75463		-628.464	-628.097	230.259	-3.7688		-628.359	-627.997	227.035	-6.99326		-628.309	-627.951	224.967	-9.06056		-628.305	-627.941	228.274	-5.75406		-628.293	-627.929	228.761	-5.26695		-628.505	-628.132	233.728	-0.29941		-628.503
0	1	Si	C2H6Si	-18.5291	-18.1687	226.161	-1.80654		-18.642	-18.2877	222.35	-5.61738		-369.275	-368.913	227.314	-0.653304		-369.268	-368.906	227.289	-0.678664		-369.235	-368.876	225.001	-2.96691		-369.205	-368.85	222.77	-5.19794		-369.225	-368.863	227.593	-0.374955		-369.219	-368.856	227.395	-0.572839		-369.285	-368.922	227.928	-0.0398216		-369.284
0	1	S	carbondisulfide	-26.0714	-25.7011	232.365	5.42201		-25.84	-25.473	230.296	3.35336		-834.544	-834.181	227.571	0.627827		-834.534	-834.172	227.464	0.521401		-834.492	-834.129	227.625	0.682341		-834.446	-834.084	226.917	-0.0263737		-834.495	-834.13	228.865	1.92174		-834.494	-834.129	229.276	2.33314		-834.557	-834.195	227.298	0.35469		-834.557
0	1	S	carbonmonosulfide	-15.7813	-15.3612	263.627	4.12515		-15.6579	-15.2377	263.685	4.18265		-436.24	-435.827	259.104	-0.397748		-436.234	-435.822	258.844	-0.65809		-436.21	-435.797	259.044	-0.458143		-436.183	-435.772	257.921	-1.58083		-436.208	-435.792	261.121	1.61849		-436.208	-435.791	261.331	1.8291		-436.249	-435.836	259.545	0.0424477		-436.249
0	1	Cl	carbontetrachloride	-65.7997	-65.4021	249.5	9.33997		-65.1157	-64.7294	242.394	2.23403		-1878.95	-1878.56	242.353	2.19255		-1878.93	-1878.54	242.483	2.32339		-1878.85	-1878.47	241.193	1.03331		-1878.76	-1878.37	240.278	0.118413		-1878.87	-1878.48	242.109	1.94856		-1878.86	-1878.48	242.756	2.5957		-1878.98	-1878.59	241.304	1.14394		-1878.98
0	1	S	carbonylsulfide	-31.9275	-31.5161	258.123	2.62718		-31.7084	-31.2996	256.544	1.04788		-511.595	-511.189	254.311	-1.18497		-511.586	-511.181	254.194	-1.30167		-511.539	-511.134	254.758	-0.737318		-511.504	-511.1	253.508	-1.98723		-511.523	-511.113	257.005	1.50929		-511.521	-511.11	257.466	1.97067		-511.61	-511.202	255.721	0.22585		-511.61
0	1	Cl	CF3Cl	-93.651	-93.185	292.407	5.17462		-93.0047	-92.5475	286.922	-0.310826		-797.944	-797.493	283.471	-3.76168		-797.929	-797.478	283.529	-3.70404		-797.809	-797.362	280.799	-6.43372		-797.757	-797.313	279.121	-8.1121		-797.751	-797.293	287.45	0.217459		-797.748	-797.288	288.332	1.09972		-797.99	-797.531	288.068	0.834815		-797.989
0	1	Mg	ch3mgcl	-23.3974	-23.0444	221.484	3.33405		-23.1945	-22.8492	216.678	-1.47211		-700.285	-699.936	218.898	0.747808		-700.272	-699.923	218.933	0.782873		-700.241	-699.894	217.307	-0.843693		-700.197	-699.853	216.152	-1.99836		-700.235	-699.88	222.656	4.50566		-700.226	-699.871	222.629	4.479		-700.295	-699.944	220.323	2.17286		-700.293
0	1	P	CH3PH2	-15.1706	-14.8214	219.17	0.568465		-15.0911	-14.7436	218.095	-0.506161		-382.455	-382.107	218.882	0.280409		-382.451	-382.102	218.868	0.266928		-382.424	-382.076	218.165	-0.436331		-382.398	-382.053	216.951	-1.65077		-382.421	-382.071	219.898	1.29649		-382.415	-382.065	219.844	1.24283		-382.463	-382.114	218.858	0.256809		-382.462
1	2	S	ch3s_rad	-17.6138	-17.2766	211.619	2.23836		-17.4764	-17.1423	209.691	0.310725		-438.067	-437.732	209.793	0.412564		-438.061	-437.727	209.644	0.263659		-438.036	-437.703	208.742	-0.639077		-438.01	-437.679	207.601	-1.78006		-438.032	-437.698	209.901	0.520463		-438.027	-437.692	210.129	0.747883		-438.075	-437.741	209.516	0.135731		-438.074
0	1	Cl	chlorinemonofluoride	-39.2873	-38.8182	294.344	7.88259		-38.9583	-38.4915	292.92	6.45802		-560.008	-559.555	284.628	-1.83373		-560	-559.547	284.588	-1.87408		-559.95	-559.499	282.952	-3.50957		-559.918	-559.47	281.121	-5.34116		-559.94	-559.481	288.475	2.01305		-559.94	-559.479	288.967	2.50542		-560.033	-559.575	287.122	0.660673		-560.032
1	2	Cl	chlorinemonoxide	-30.9816	-30.5652	261.325	13.2308		-30.7164	-30.3091	255.559	7.46502		-535.348	-534.956	246.365	-1.7291		-535.341	-534.948	246.329	-1.7647		-535.301	-534.907	246.986	-1.10775		-535.269	-534.878	245.196	-2.89767		-535.292	-534.893	250.485	2.39044		-535.291	-534.891	250.997	2.90311		-535.367	-534.971	248.598	0.50423		-535.367
0	1	Cl	chlorinetrifluoride	-87.7843	-87.3279	286.431	5.73516		-87.1433	-86.6798	290.824	10.1275		-759.633	-759.196	273.985	-6.71124		-759.62	-759.183	273.995	-6.70112		-759.495	-759.064	270.341	-10.3549		-759.443	-759.017	266.911	-13.7848		-759.452	-759.002	281.977	1.28062		-759.45	-759	282.532	1.83639		-759.689	-759.239	282.485	1.78856		-759.688
0	1	Cl	chloro-ethene	-28.1335	-27.7712	227.367	2.79044		-27.8871	-27.5334	221.953	-2.62428		-538.2	-537.842	224.952	0.375091		-538.191	-537.833	224.997	0.419814		-538.157	-537.802	222.798	-1.77874		-538.123	-537.771	220.551	-4.02546		-538.147	-537.787	225.515	0.938512		-538.141	-537.781	225.799	1.22176		-538.212	-537.853	224.97	0.393334		-538.211
0	1	Cl	chloroform	-51.3708	-50.9737	249.182	7.79836		-50.848	-50.4603	243.277	1.89332		-1419.35	-1418.96	243.325	1.94162		-1419.33	-1418.94	243.434	2.05042		-1419.27	-1418.88	241.998	0.614318		-1419.2	-1418.81	240.937	-0.446964		-1419.28	-1418.89	243.033	1.6488		-1419.27	-1418.89	243.779	2.39481		-1419.37	-1418.98	242.311	0.92727		-1419.37
0	1	Cl	cl2	-30.057	-29.626	270.465	13.9786		-29.7207	-29.3003	263.769	7.28289		-920.404	-919.992	258.811	2.3242		-920.393	-919.981	258.843	2.356		-920.356	-919.942	259.809	3.32268		-920.31	-919.898	258.914	2.42714		-920.372	-919.957	260.486	3.9999		-920.371	-919.955	261.125	4.63816		-920.418	-920.007	257.695	1.20816		-920.418
0	1	Cl	Cl2SO2	-72.2174	-71.7953	264.871	2.88923		-71.6293	-71.2113	262.339	0.35775		-1469.11	-1468.69	262.255	0.273334		-1469.09	-1468.67	262.327	0.34507		-1468.96	-1468.55	261.959	-0.0226927		-1468.88	-1468.46	260.461	-1.52106		-1468.95	-1468.53	263.113	1.13108		-1468.95	-1468.53	263.669	1.68703		-1469.15	-1468.73	263.531	1.5497		-1469.15
2	1	Cl	ClN	-24.8702	-24.4402	269.845	19.296		-24.6489	-24.2358	259.227	8.67789		-514.862	-514.462	250.956	0.407093		-514.854	-514.454	250.955	0.406208		-514.825	-514.422	252.528	1.97862		-514.795	-514.394	251.546	0.997193		-514.819	-514.413	254.626	4.07716		-514.818	-514.411	255.077	4.52784		-514.875	-514.474	251.452	0.903022		-514.874
0	1	S	dimethylsulfide	-25.0932	-24.7783	197.59	3.31674		-24.923	-24.6119	195.172	0.898901		-478.007	-477.697	194.66	0.387104		-478	-477.69	194.574	0.300509		-477.965	-477.655	194.128	-0.145428		-477.934	-477.626	192.801	-1.47247		-477.951	-477.639	195.72	1.44715		-477.94	-477.628	196.131	1.85772		-478.017	-477.707	194.757	0.484063		-478.016
0	1	S	dimethylsulfoxide	-41.0566	-40.7578	187.492	-14.3207		-40.8126	-40.5031	194.221	-7.59156		-553.223	-552.907	198.205	-3.60769		-553.213	-552.897	198.169	-3.64376		-553.145	-552.832	195.975	-5.83796		-553.104	-552.795	193.813	-7.9998		-553.114	-552.797	198.722	-3.0904		-553.102	-552.785	198.941	-2.87195		-553.245	-552.924	201.514	-0.298762		-553.244
0	1	Si	disilane	-10.7976	-10.449	218.763	-17.0009		-11.2534	-10.8788	235.051	-0.712565		-582.581	-582.205	235.813	0.0486156		-582.574	-582.199	235.762	-0.00164692		-582.544	-582.167	236.247	0.483026		-582.509	-582.134	235.15	-0.614202		-582.557	-582.178	237.781	2.01725		-582.555	-582.177	237.621	1.85699		-582.59	-582.214	236.276	0.511637		-582.59
0	1	S	ethanethiol	-25.1023	-24.7696	208.8	1.25616		-24.92	-24.5884	208.067	0.523491		-478.008	-477.676	207.876	0.33277		-478.001	-477.669	207.782	0.238252		-477.965	-477.635	206.888	-0.655106		-477.933	-477.606	205.725	-1.81853		-477.952	-477.621	207.92	0.376197		-477.943	-477.611	208.14	0.596724		-478.018	-477.686	207.825	0.281872		-478.017
0	1	Cl	ethylchloride	-29.3556	-28.9656	244.681	1.00877		-29.1127	-28.7242	243.803	0.131154		-539.424	-539.034	244.479	0.807004		-539.415	-539.026	244.489	0.817191		-539.382	-538.995	242.874	-0.798202		-539.349	-538.964	241.481	-2.19147		-539.369	-538.98	244.414	0.741342		-539.36	-538.971	244.353	0.681094		-539.434	-539.046	243.949	0.276798		-539.434
0	1	S	H2CS	-17.0213	-16.6808	213.644	2.71777		-16.8858	-16.5481	211.916	0.990234		-437.48	-437.143	211.34	0.4136		-437.474	-437.138	211.22	0.293724		-437.449	-437.113	210.526	-0.400339		-437.422	-437.089	209.401	-1.52467		-437.446	-437.108	211.724	0.797588		-437.442	-437.104	212.031	1.10497		-437.488	-437.152	211.091	0.165322		-437.488
0	1	Cl	hydrogenchloride	-15.6508	-15.1846	292.546	2.05729		-15.4745	-15.0106	291.087	0.598069		-460.821	-460.357	291.538	1.04931		-460.816	-460.352	291.519	1.03074		-460.796	-460.334	289.832	-0.656516		-460.773	-460.312	288.985	-1.50397		-460.803	-460.34	290.13	-0.358161		-460.802	-460.339	290.301	-0.187808		-460.828	-460.365	290.442	-0.0467168		-460.827
0	1	S	hydrogensulfide	-11.3994	-11.0205	237.793	0.815282		-11.2838	-10.9053	237.509	0.530984		-399.406	-399.028	237.166	0.187605		-399.402	-399.024	237.01	0.0321092		-399.381	-399.004	236	-0.977789		-399.359	-398.985	235.118	-1.86047		-399.387	-399.011	236.053	-0.924789		-399.385	-399.009	236.088	-0.890488		-399.411	-399.034	236.813	-0.165334		-399.411
0	1	Cl	hypochlorousacid	-31.6298	-31.2183	258.235	7.02029		-31.3646	-30.9571	255.668	4.4531		-535.998	-535.6	249.932	-1.28287		-535.991	-535.592	249.914	-1.30042		-535.949	-535.552	249.337	-1.87769		-535.917	-535.523	247.428	-3.78703		-535.942	-535.54	252.467	1.25199		-535.938	-535.535	252.977	1.76204		-536.017	-535.615	251.794	0.579264		-536.016
0	1	P	li2ph	-7.60952	-7.41915	119.457	-3.88894		-7.55527	-7.36569	118.962	-4.38422		-357.003	-356.806	123.628	0.281237		-356.997	-356.8	123.422	0.0752144		-356.979	-356.786	121.396	-1.9504		-356.955	-356.762	120.642	-2.70401		-356.979	-356.789	119.106	-4.2402		-356.977	-356.787	118.965	-4.3815		-357.006	-356.811	121.757	-1.58926		-357.004
0	1	S	li2s2	-20.9887	-20.7303	162.172	4.06552		-20.7993	-20.5444	159.991	1.8839		-811.577	-811.324	158.974	0.866739		-811.566	-811.313	158.709	0.602024		-811.527	-811.271	160.615	2.5078		-811.481	-811.227	159.294	1.18716		-811.537	-811.281	160.761	2.65415		-811.535	-811.278	161.197	3.09045		-811.586	-811.334	158.457	0.349672		-811.584
0	1	Si	li2si2	-7.46318	-7.25684	129.482	5.51959		-8.10752	-7.91656	119.831	-4.13135		-593.991	-593.794	123.809	-0.153087		-593.982	-593.785	123.664	-0.298142		-593.955	-593.759	123.057	-0.905115		-593.919	-593.724	122.172	-1.78966		-593.965	-593.77	122.814	-1.14812		-593.964	-593.768	122.79	-1.17162		-593.998	-593.801	123.702	-0.260232		-593.997
0	1	Cl	licl	-15.3567	-14.9971	225.63	-3.64291		-15.1898	-14.8305	225.468	-3.80573		-467.814	-467.447	230.268	0.99485		-467.806	-467.439	230.329	1.05614		-467.788	-467.424	228.811	-0.462283		-467.761	-467.4	226.97	-2.30328		-467.793	-467.428	229.268	-0.00492716		-467.792	-467.427	229.394	0.120202		-467.819	-467.453	229.281	0.00789705		-467.818
0	1	P	liph2	-7.95823	-7.71949	149.808	-3.55939		-7.90214	-7.66422	149.292	-4.0746		-350.066	-349.821	153.776	0.408812		-350.062	-349.817	153.668	0.30137		-350.043	-349.802	151.146	-2.2212		-350.019	-349.781	149.417	-3.9498		-350.046	-349.806	151.04	-2.32657		-350.045	-349.804	150.798	-2.56881		-350.071	-349.828	152.821	-0.54556		-350.07
0	1	S	lish	-11.0645	-10.7675	186.386	-4.54755		-10.9571	-10.6585	187.401	-3.5325		-406.351	-406.046	191.313	0.379353		-406.346	-406.041	191.225	0.291821		-406.325	-406.024	188.834	-2.09944		-406.299	-406.002	186.728	-4.20574		-406.328	-406.027	189.071	-1.86234		-406.327	-406.026	188.972	-1.96097		-406.356	-406.052	190.746	-0.187418		-406.355
0	1	S	methanethiol	-18.245	-17.903	214.638	2.26744		-18.1015	-17.7618	213.13	0.759623		-438.705	-438.366	212.727	0.355968		-438.7	-438.361	212.607	0.235824		-438.671	-438.334	211.99	-0.381153		-438.645	-438.309	210.821	-1.54983		-438.668	-438.329	212.803	0.432017		-438.662	-438.322	213.037	0.665894		-438.713	-438.374	212.603	0.232759		-438.712
0	1	Cl	methylchloride	-22.4943	-22.0854	256.564	2.63937		-22.2917	-21.8869	254.065	0.140631		-500.118	-499.712	254.966	1.04184		-500.111	-499.705	254.971	1.04623		-500.085	-499.68	253.82	-0.104614		-500.057	-499.654	252.578	-1.34634		-500.081	-499.675	254.847	0.92301		-500.076	-499.669	255.08	1.15521		-500.126	-499.721	254.207	0.282828		-500.126
0	1	Cl	methylenechloride	-36.9351	-36.5374	249.543	5.94886		-36.5723	-36.1811	245.478	1.8841		-959.734	-959.343	245.134	1.53994		-959.721	-959.331	245.194	1.59991		-959.679	-959.291	243.49	-0.104343		-959.629	-959.243	242.167	-1.42696		-959.682	-959.292	244.619	1.02495		-959.677	-959.286	244.946	1.35119		-959.749	-959.36	244.077	0.48256		-959.749
0	1	Si	methylsilane	-12.8879	-12.4593	268.934	5.78988		-13.0465	-12.6281	262.564	-0.580028		-331.198	-330.779	262.949	-0.195237		-331.193	-330.774	262.849	-0.295083		-331.168	-330.75	262.257	-0.887367		-331.144	-330.728	260.697	-2.44761		-331.165	-330.745	263.569	0.424844		-331.159	-330.74	262.754	-0.390751		-331.205	-330.786	263.244	0.100163		-331.204
0	1	Mg	mg2	-1.63264	-1.3957	148.685	0.930592		-1.62801	-1.39475	146.371	-1.38306		-400.174	-399.939	147.567	-0.187012		-400.162	-399.928	147.291	-0.463449		-400.156	-399.92	147.936	0.182122		-400.128	-399.891	148.243	0.488569		-400.164	-399.924	150.68	2.92557		-400.164	-399.924	151.013	3.25902		-400.181	-399.944	148.662	0.908351		-400.181
0	1	Mg	mg2h4	-3.99345	-3.66438	206.495	2.41627		-3.98777	-3.66411	203.104	-0.974555		-402.537	-402.212	204.242	0.163148		-402.526	-402.2	204.124	0.0452913		-402.512	-402.186	204.563	0.484329		-402.482	-402.156	204.907	0.827933		-402.51	-402.182	206.317	2.23859		-402.503	-402.174	206.406	2.32724		-402.543	-402.218	204.279	0.200627		-402.541
0	1	Mg	mgc2	-11.9769	-11.6911	179.316	-6.69515		-11.9185	-11.6328	179.305	-6.70651		-276.146	-275.85	185.616	-0.395362		-276.136	-275.841	185.517	-0.494041		-276.115	-275.822	183.598	-2.41397		-276.086	-275.796	182.23	-3.78177		-276.094	-275.799	185.137	-0.874899		-276.088	-275.794	184.423	-1.58849		-276.153	-275.856	185.9	-0.111504		-276.151
0	1	Mg	mg-ch32	-15.7127	-15.4133	187.872	0.877055		-15.6355	-15.34	185.432	-1.56294		-279.878	-279.581	186.852	-0.143383		-279.87	-279.572	186.844	-0.151331		-279.845	-279.55	184.754	-2.24068		-279.817	-279.525	183.285	-3.70962		-279.83	-279.528	189.522	2.52705		-279.816	-279.514	189.365	2.37039		-279.886	-279.588	187.479	0.484301		-279.885
0	1	Mg	mgcl2	-31.069	-30.6802	244.032	2.2048		-30.7451	-30.3601	241.535	-0.291981		-1120.68	-1120.29	243.207	1.38008		-1120.67	-1120.28	243.285	1.45815		-1120.63	-1120.24	241.266	-0.560785		-1120.57	-1120.18	240.352	-1.47499		-1120.63	-1120.25	240.365	-1.4621		-1120.63	-1120.24	240.204	-1.62275		-1120.7	-1120.31	242.522	0.694948		-1120.69
0	1	Mg	mgf2	-49.5859	-49.1692	261.438	-21.2229		-49.2912	-48.8494	277.272	-5.38853		-399.98	-399.532	280.911	-1.7498		-399.969	-399.521	280.652	-2.0087		-399.893	-399.457	273.161	-9.49942		-399.856	-399.423	271.925	-10.7359		-399.836	-399.406	270.239	-12.422		-399.831	-399.401	270.278	-12.3828		-400.002	-399.552	281.969	-0.691114		-399.999
1	0	Mg	mgh	-1.36772	-1.11204	160.44	0.09258		-1.36417	-1.11048	159.192	-1.15509		-200.636	-200.38	160.821	0.473728		-200.63	-200.374	160.781	0.433023		-200.626	-200.37	160.624	0.276233		-200.611	-200.354	161.202	0.854899		-200.626	-200.372	159.377	-0.970163		-200.624	-200.37	159.417	-0.93059		-200.639	-200.383	160.708	0.36042		-200.639
0	1	Mg	mgh2	-1.97782	-1.63264	216.608	1.89709		-1.97249	-1.6319	213.726	-0.984879		-201.247	-200.904	215.018	0.307831		-201.241	-200.898	214.89	0.179612		-201.236	-200.893	215.203	0.492246		-201.22	-200.877	215.471	0.760482		-201.237	-200.892	216.181	1.46989		-201.233	-200.89	215.476	0.765153		-201.25	-200.908	214.971	0.260132		-201.249
0	1	Mg	mgo	-16.8054	-16.5208	178.587	-8.38293		-16.7084	-16.4236	178.658	-8.31203		-275.27	-274.974	186.121	-0.848874		-275.262	-274.966	185.96	-1.01008		-275.234	-274.94	184.325	-2.64494		-275.208	-274.915	184.119	-2.85077		-275.205	-274.92	178.703	-8.2671		-275.203	-274.917	179.213	-7.75643		-275.28	-274.983	186.784	-0.186189		-275.279
0	1	Mg	mgoh	-34.2033	-33.879	203.487	-18.6466		-34.0179	-33.671	217.627	-4.50607		-351.87	-351.52	219.373	-2.76056		-351.859	-351.51	219.258	-2.87509		-351.798	-351.458	212.933	-9.2001		-351.761	-351.424	211.601	-10.5322		-351.755	-351.422	209.308	-12.8256		-351.745	-351.41	209.7	-12.4335		-351.888	-351.536	220.946	-1.18726		-351.885
0	1	Mg	mgs	-11.0189	-10.7306	180.9	1.26425		-10.9212	-10.6402	176.359	-3.27685		-598.29	-598.002	180.266	0.630139		-598.28	-597.993	180.175	0.538839		-598.259	-597.973	179.383	-0.253193		-598.223	-597.938	178.739	-0.897283		-598.258	-597.977	176.374	-3.2618		-598.256	-597.975	176.38	-3.25645		-598.297	-598.01	180.337	0.700809		-598.297
0	1	Mg	mgsh	-22.5217	-22.2018	200.756	1.4976		-22.3155	-21.9994	198.348	-0.910337		-997.801	-997.483	199.731	0.472868		-997.788	-997.47	199.666	0.408296		-997.745	-997.429	198.142	-1.11633		-997.689	-997.375	197.212	-2.04619		-997.75	-997.436	196.896	-2.36198		-997.746	-997.432	196.744	-2.51412		-997.812	-997.494	199.608	0.34992		-997.811
0	1	Na	na2	-0.347375	-0.180964	104.424	-14.9991		-0.383967	-0.21279	107.415	-12.0081		-324.603	-324.412	119.87	0.446478		-324.578	-324.387	119.888	0.464817		-324.587	-324.397	119.417	-0.00613133		-324.56	-324.369	119.76	0.336453		-324.594	-324.403	119.865	0.441257		-324.594	-324.403	119.898	0.47444		-324.609	-324.419	119.614	0.190269		-324.609
0	1	Na	na2c2	-11.6157	-11.4197	122.968	-19.3318		-11.56	-11.3537	129.432	-12.8679		-400.729	-400.503	141.542	-0.757792		-400.701	-400.475	141.563	-0.7368		-400.692	-400.471	138.707	-3.59208		-400.649	-400.432	136.155	-6.14414		-400.68	-400.459	139.165	-3.1344		-400.677	-400.457	138.375	-3.92453		-400.739	-400.513	141.671	-0.628681		-400.738
0	1	Na	na2nh	-10.865	-10.7258	87.3878	-19.3738		-10.8303	-10.679	94.9412	-11.8204		-379.924	-379.755	106.095	-0.666526		-379.898	-379.729	105.997	-0.764878		-379.89	-379.725	103.494	-3.26789		-379.853	-379.689	102.494	-4.26743		-379.877	-379.717	100.112	-6.65004		-379.873	-379.714	99.8086	-6.95302		-379.932	-379.764	105.599	-1.16295		-379.932
0	1	Na	na2o	-16.4237	-16.2637	100.366	-23.1181		-16.3414	-16.1683	108.594	-14.8907		-399.848	-399.652	123.06	-0.424386		-399.821	-399.625	122.879	-0.605811		-399.804	-399.612	120.971	-2.5132		-399.765	-399.574	119.814	-3.66995		-399.787	-399.6	117.101	-6.3834		-399.785	-399.599	116.853	-6.63113		-399.857	-399.662	122.066	-1.41816		-399.856
0	1	Na	na2o2	-32.4611	-32.2884	108.367	-20.303		-32.2777	-32.0913	116.993	-11.677		-475.064	-474.862	126.826	-1.84389		-475.034	-474.832	126.786	-1.88416		-474.996	-474.8	122.841	-5.82892		-474.947	-474.756	119.924	-8.74626		-474.966	-474.771	122.234	-6.4362		-474.964	-474.769	122.108	-6.56216		-475.079	-474.876	127.352	-1.31764		-475.078
0	1	Na	na2ph	-7.53144	-7.37437	98.5666	-11.6364		-7.48593	-7.32325	102.083	-8.1196		-666.569	-666.393	110.516	0.312775		-666.541	-666.365	110.415	0.211587		-666.533	-666.36	108.718	-1.4848		-666.486	-666.314	108.026	-2.17732		-666.54	-666.373	105.318	-4.88491		-666.539	-666.371	105.087	-5.11597		-666.579	-666.404	109.549	-0.654053		-666.578
0	1	Na	na2s2	-20.909	-20.7009	130.58	-2.61587		-20.7164	-20.5051	132.613	-0.581971		-1121.12	-1120.9	134.608	1.4121		-1121.09	-1120.87	134.729	1.53374		-1121.06	-1120.84	135.323	2.12727		-1120.99	-1120.78	134.435	1.23937		-1121.07	-1120.86	134.845	1.64941		-1121.07	-1120.86	135.224	2.02897		-1121.13	-1120.92	133.312	0.116975		-1121.13
0	1	Na	na2si2	-7.41236	-7.23465	111.514	-3.37029		-8.04908	-7.87809	107.302	-7.58189		-903.567	-903.384	114.596	-0.287699		-903.536	-903.354	114.509	-0.375482		-903.521	-903.338	114.454	-0.430286		-903.461	-903.28	113.715	-1.16955		-903.538	-903.357	113.274	-1.61014		-903.537	-903.356	113.234	-1.65036		-903.581	-903.398	114.905	0.0204776		-903.581
0	1	Na	nach3	-7.59407	-7.3759	136.905	-18.2252		-7.57548	-7.34289	145.955	-9.17494		-202.169	-201.922	154.79	-0.340521		-202.155	-201.909	154.691	-0.439061		-202.149	-201.905	153.022	-2.1085		-202.127	-201.887	150.853	-4.27726		-202.144	-201.897	154.997	-0.132958		-202.138	-201.89	155.576	0.446309		-202.175	-201.928	154.928	-0.202291		-202.174
0	1	Na	nacl	-15.3157	-14.9918	203.248	-9.10278		-15.1547	-14.8252	206.771	-5.5802		-622.591	-622.251	213.271	0.919496		-622.573	-622.233	213.275	0.923652		-622.56	-622.223	211.255	-1.09599		-622.522	-622.188	209.992	-2.35969		-622.567	-622.232	210.483	-1.86867		-622.566	-622.231	210.489	-1.86251		-622.599	-622.261	211.95	-0.401084		-622.599
0	1	Na	nanh2	-11.3011	-11.0949	129.423	-21.7161		-11.2589	-11.0336	141.346	-9.79307		-218.244	-218.008	147.737	-3.4022		-218.23	-217.994	147.713	-3.42586		-218.215	-217.986	143.748	-7.39068		-218.191	-217.966	141.615	-9.52359		-218.204	-217.977	142.544	-8.59441		-218.198	-217.971	142.262	-8.87649		-218.254	-218.016	149.451	-1.68767		-218.253
0	1	Na	naoh	-16.8466	-16.5847	164.34	-25.3335		-16.7629	-16.4782	178.641	-11.0326		-238.155	-237.859	186.196	-3.47777		-238.141	-237.844	186.195	-3.47815		-238.113	-237.827	180.026	-9.64707		-238.088	-237.805	177.586	-12.0871		-238.1	-237.814	179.532	-10.1413		-238.096	-237.81	179.449	-10.2243		-238.169	-237.87	187.649	-2.02473		-238.168
0	1	Na	naph2	-7.9237	-7.69896	141.022	-16.7296		-7.88523	-7.6453	150.558	-7.19407		-504.867	-504.614	158.274	0.521552		-504.851	-504.599	158.244	0.491624		-504.838	-504.587	157.055	-0.69669		-504.804	-504.555	156.12	-1.6322		-504.847	-504.595	157.691	-0.0606818		-504.845	-504.594	157.795	0.0428547		-504.874	-504.623	157.769	0.0168743		-504.874
0	1	Na	nash	-11.0295	-10.7649	166.082	-7.52517		-10.9233	-10.6536	169.24	-4.36743		-561.13	-560.852	174.019	0.411852		-561.113	-560.836	173.945	0.337391		-561.098	-560.824	171.79	-1.8171		-561.062	-560.791	170.431	-3.17587		-561.102	-560.832	169.651	-3.95658		-561.101	-560.831	169.333	-4.27423		-561.137	-560.861	173.138	-0.469735		-561.137
0	1	Cl	nitrosylchloride	-40.9614	-40.5436	262.182	5.50125		-40.6527	-40.24	258.963	2.28274		-590.164	-589.755	256.22	-0.460035		-590.154	-589.746	256.188	-0.492071		-590.104	-589.696	256.469	-0.211517		-590.065	-589.658	255.482	-1.19826		-590.083	-589.673	257.392	0.711423		-590.082	-589.671	257.885	1.20415		-590.181	-589.772	256.765	0.0844974		-590.181
0	1	P	p2	-13.0754	-12.6898	241.95	5.34283		-12.992	-12.6184	234.407	-2.19939		-682.729	-682.352	236.729	0.121879		-682.723	-682.345	236.685	0.078354		-682.696	-682.315	238.607	2.00026		-682.657	-682.279	237.443	0.835935		-682.711	-682.33	238.696	2.08935		-682.71	-682.33	238.63	2.02291		-682.741	-682.363	237.092	0.484704		-682.74
0	1	P	P4	-26.1713	-25.8267	216.269	4.28318		-26.0505	-25.7152	210.398	-1.58699		-1365.53	-1365.19	212.566	0.580699		-1365.51	-1365.17	212.541	0.556082		-1365.44	-1365.1	214.496	2.51018		-1365.37	-1365.03	214.326	2.34104		-1365.47	-1365.13	215.743	3.7575		-1365.47	-1365.13	216.279	4.2934		-1365.54	-1365.21	212.988	1.00288		-1365.54
0	1	Cl	PCl3	-51.7291	-51.3307	249.999	18.8968		-51.2144	-50.8355	237.71	6.60772		-1722.1	-1721.73	233.927	2.82492		-1722.08	-1721.71	234.024	2.92186		-1722	-1721.63	235.482	4.37917		-1721.92	-1721.55	234.351	3.24813		-1722.04	-1721.66	236.483	5.38039		-1722.03	-1721.66	237.011	5.90865		-1722.12	-1721.75	232.941	1.8385		-1722.12
0	1	Cl	PCl5	-81.7614	-81.3744	242.878	16.1348		-80.9437	-80.5775	229.789	3.04525		-2642.51	-2642.15	229.894	3.15115		-2642.49	-2642.12	230.09	3.34664		-2642.36	-2641.99	230.352	3.60904		-2642.23	-2641.87	229.57	2.82644		-2642.41	-2642.04	231.392	4.64866		-2642.41	-2642.04	232.051	5.30796		-2642.55	-2642.18	229.186	2.44257		-2642.55
0	1	P	PF5	-128.136	-127.626	319.973	4.22158		-127.466	-126.963	315.962	0.210319		-840.888	-840.392	310.981	-4.7707		-840.871	-840.375	311.24	-4.51211		-840.678	-840.19	305.639	-10.1123		-840.609	-840.126	303.146	-12.606		-840.574	-840.072	315.342	-0.410071		-840.572	-840.068	315.895	0.143084		-840.958	-840.453	316.926	1.17445		-840.957
2	1	P	PH	-7.07482	-6.70078	234.71	4.76673		-7.02059	-6.6531	230.607	0.663501		-341.889	-341.522	230.184	0.240775		-341.886	-341.519	230.126	0.182378		-341.872	-341.506	229.872	-0.0716928		-341.853	-341.487	229.491	-0.452487		-341.879	-341.512	230.041	0.0977059		-341.878	-341.512	229.99	0.0465378		-341.895	-341.528	229.888	-0.0552207		-341.894
1	0	P	ph2_rad	-7.69176	-7.32747	228.597	4.01843		-7.64152	-7.28288	225.054	0.475635		-342.515	-342.157	224.7	0.121694		-342.512	-342.154	224.66	0.0810513		-342.495	-342.138	224.359	-0.219786		-342.476	-342.119	223.762	-0.8169		-342.502	-342.144	224.613	0.0339748		-342.501	-342.144	224.483	-0.095115		-342.521	-342.163	224.542	-0.0363806		-342.521
0	1	P	phosphine	-8.31812	-7.93835	238.308	-2.71902		-8.26929	-7.88578	240.658	-0.36856		-343.149	-342.764	241.196	0.169251		-343.145	-342.761	241.169	0.142191		-343.127	-342.744	239.909	-1.11757		-343.107	-342.725	239.285	-1.7418		-343.134	-342.749	241.117	0.0906021		-343.132	-342.748	240.98	-0.0465555		-343.154	-342.771	240.814	-0.213104		-343.154
0	1	P	phosphorustrifluoride	-79.5368	-79.0733	290.831	17.2744		-79.1027	-78.6628	276.04	2.4832		-641.096	-640.668	268.628	-4.92827		-641.085	-640.657	268.919	-4.63727		-640.962	-640.536	267.296	-6.26048		-640.913	-640.49	265.77	-7.78632		-640.91	-640.469	276.499	2.94271		-640.908	-640.467	276.899	3.34267		-641.146	-640.708	274.805	1.24847		-641.145
0	1	P	PN	-16.4344	-16.0028	270.822	2.35865		-16.3584	-15.9328	267.049	-1.4136		-396.104	-395.678	267.294	-1.16886		-396.098	-395.673	267.138	-1.32504		-396.071	-395.644	268.111	-0.351514		-396.042	-395.617	266.795	-1.66828		-396.065	-395.637	268.453	-0.0100458		-396.064	-395.636	268.248	-0.214745		-396.114	-395.687	267.881	-0.58177		-396.114
1	0	P	PO	-22.5378	-22.2071	207.495	12.7023		-22.4316	-22.1191	196.132	1.33896		-416.587	-416.281	191.603	-3.19024		-416.581	-416.276	191.55	-3.24301		-416.541	-416.236	191.094	-3.69916		-416.511	-416.207	190.545	-4.24786		-416.532	-416.225	193.03	-1.76253		-416.531	-416.223	193.2	-1.59242		-416.603	-416.294	194.117	-0.676062		-416.603
0	1	Cl	POCl3	-67.7221	-67.3027	263.218	11.8064		-67.1822	-66.7786	253.274	1.86179		-1797.37	-1796.97	252.876	1.46418		-1797.35	-1796.94	252.958	1.54591		-1797.24	-1796.84	253.035	1.62294		-1797.14	-1796.74	251.738	0.326563		-1797.25	-1796.85	254.048	2.63618		-1797.25	-1796.84	254.515	3.10359		-1797.4	-1797	253.199	1.78718		-1797.4
1	0	S	PS	-16.7238	-16.4114	196.017	13.6253		-16.5876	-16.2907	186.299	3.9074		-739.563	-739.271	182.948	0.556231		-739.556	-739.264	182.818	0.426413		-739.523	-739.23	184.059	1.66661		-739.484	-739.192	183.63	1.23828		-739.538	-739.245	184.301	1.90885		-739.538	-739.244	184.383	1.99103		-739.574	-739.283	182.733	0.341468		-739.574
2	1	S	s2	-20.3941	-20.0252	231.508	15.919		-20.1951	-19.8374	224.42	8.83075		-796.413	-796.068	216.472	0.882968		-796.405	-796.061	216.307	0.718019		-796.37	-796.021	218.532	2.94263		-796.329	-795.982	217.996	2.40656		-796.384	-796.035	218.913	3.32354		-796.384	-796.034	219.125	3.5361		-796.424	-796.08	216.276	0.686473		-796.424
0	1	Cl	S2Cl2	-50.4903	-50.1171	234.195	11.9563		-49.965	-49.6043	226.328	4.08945		-1716.87	-1716.52	224.29	2.05177		-1716.86	-1716.5	224.375	2.13601		-1716.78	-1716.42	225.872	3.63315		-1716.69	-1716.33	224.87	2.63128		-1716.81	-1716.45	226.461	4.22206		-1716.8	-1716.44	227.253	5.01491		-1716.9	-1716.54	223.977	1.73876		-1716.9
1	2	Cl	SCl	-25.2095	-24.8403	231.7	14.1324		-24.9421	-24.5839	224.796	7.22846		-858.389	-858.04	219.079	1.51189		-858.38	-858.031	218.945	1.37785		-858.343	-857.992	220.505	2.93773		-858.3	-857.95	219.483	1.91568		-858.358	-858.006	221.16	3.59259		-858.357	-858.004	221.65	4.08273		-858.401	-858.053	218.614	1.04637		-858.401
0	1	Cl	SCl2	-40.2726	-39.9043	231.152	19.4877		-39.8422	-39.4888	221.757	10.0928		-1318.64	-1318.3	214.044	2.37961		-1318.62	-1318.28	214.015	2.35107		-1318.56	-1318.22	216.869	5.20468		-1318.5	-1318.15	215.695	4.03102		-1318.59	-1318.24	217.328	5.66326		-1318.59	-1318.24	217.95	6.28537		-1318.66	-1318.32	213.676	2.01188		-1318.66
0	1	S	SF6	-155.88	-155.373	318.163	-2.66966		-154.878	-154.365	322.27	1.43767		-997.372	-996.869	316.006	-4.82669		-997.353	-996.849	316.229	-4.60356		-997.122	-996.626	311.379	-9.45346		-997.045	-996.553	308.597	-12.2357		-996.992	-996.479	322.021	1.18868		-996.988	-996.474	322.822	1.98949		-997.452	-996.938	322.821	1.98771		-997.451
1	2	S	sh_rad	-10.7617	-10.3819	238.286	0.0669402		-10.6521	-10.2732	237.772	-0.446945		-398.76	-398.38	238.348	0.129045		-398.756	-398.376	238.127	-0.0925908		-398.738	-398.36	236.894	-1.32482		-398.717	-398.34	236.127	-2.09227		-398.744	-398.366	237.258	-0.960759		-398.744	-398.365	237.44	-0.779605		-398.765	-398.386	237.954	-0.264975		-398.765
2	3	Si	si2	-6.94841	-6.68202	167.168	-9.55961		-7.58376	-7.30129	177.25	0.521945		-578.887	-578.607	175.8	-0.927602		-578.88	-578.6	175.737	-0.990132		-578.856	-578.574	177.183	0.455031		-578.824	-578.542	176.931	0.203447		-578.869	-578.587	177.479	0.751701		-578.869	-578.586	177.651	0.923854		-578.892	-578.612	176.061	-0.666852		-578.892
0	1	Si	Si2H2	-8.13697	-7.8405	186.036	0.609869		-8.73871	-8.44698	183.064	-2.3621		-580.06	-579.764	185.378	-0.0480311		-580.053	-579.758	185.357	-0.0692782		-580.026	-579.729	186.456	1.02977		-579.991	-579.696	185.324	-0.102731		-580.04	-579.741	187.75	2.32393		-580.039	-579.74	187.655	2.22839		-580.069	-579.772	186.416	0.990197		-580.068
0	1	Si	Si2H4	-9.48125	-9.21046	169.923	-11.0215		-10.0109	-9.72683	178.272	-2.67271		-581.335	-581.047	180.984	0.0394644		-581.329	-581.04	180.972	0.0272544		-581.299	-581.011	181.043	0.0975041		-581.265	-580.978	179.821	-1.12378		-581.313	-581.023	182.402	1.45679		-581.312	-581.021	182.311	1.36558		-581.344	-581.054	181.699	0.754278		-581.344
1	0	Si	si2h5_rad	-10.1269	-9.85301	171.881	-15.5843		-10.6168	-10.3168	188.293	0.82771		-581.94	-581.641	187.314	-0.15091		-581.933	-581.635	187.246	-0.219095		-581.903	-581.605	187.247	-0.218486		-581.869	-581.572	186.386	-1.07901		-581.917	-581.616	188.755	1.28977		-581.916	-581.615	188.568	1.10254		-581.949	-581.65	187.703	0.237329		-581.948
1	0	Si	SiCl	-18.567	-18.3137	158.964	-9.45653		-18.7105	-18.4351	172.81	4.38888		-749.701	-749.431	169.195	0.773803		-749.692	-749.423	169.18	0.75929		-749.661	-749.389	170.46	2.03946		-749.623	-749.351	170.145	1.72447		-749.676	-749.405	170.523	2.10169		-749.676	-749.404	170.695	2.27414		-749.711	-749.441	169.331	0.910501		-749.711
0	1	Si	SiCl2	-33.7106	-33.3411	231.846	6.67367		-33.6869	-33.3199	230.276	5.10411		-1210.02	-1209.65	226.736	1.56337		-1210	-1209.64	226.764	1.59201		-1209.95	-1209.59	228.231	3.05855		-1209.89	-1209.53	227.473	2.30046		-1209.97	-1209.61	228.996	3.82373		-1209.97	-1209.61	229.332	4.1596		-1210.03	-1209.67	226.348	1.17563		-1210.03
1	0	Si	SiH	-4.06528	-3.81959	154.168	-26.632		-4.34478	-4.05482	181.948	1.14856		-289.999	-289.711	180.617	-0.182927		-289.996	-289.708	180.593	-0.206579		-289.983	-289.695	180.32	-0.479314		-289.966	-289.679	180.243	-0.556835		-289.99	-289.702	180.691	-0.10859		-289.99	-289.702	180.672	-0.127657		-290.003	-289.715	180.585	-0.214938		-290.003
0	1	Si	silane	-6.02936	-5.57601	284.48	6.57258		-6.21289	-5.77074	277.454	-0.453653		-291.88	-291.437	277.895	-0.0121015		-291.877	-291.434	277.77	-0.137835		-291.861	-291.418	277.84	-0.0680439		-291.842	-291.401	276.601	-1.30704		-291.867	-291.423	278.376	0.468609		-291.866	-291.423	277.728	-0.179165		-291.885	-291.442	277.913	0.00526736		-291.885
0	1	Si	siliconmonoxide	-19.627	-19.2527	234.879	-23.555		-19.8287	-19.4185	257.402	-1.03207		-364.77	-364.362	256.293	-2.14072		-364.765	-364.356	256.178	-2.25563		-364.729	-364.32	256.534	-1.89962		-364.701	-364.293	255.984	-2.44973		-364.72	-364.31	257.351	-1.08262		-364.719	-364.309	257.246	-1.18745		-364.785	-364.373	258.123	-0.310495		-364.784
0	1	Si	silicontetrafluoride	-101.127	-100.601	329.683	-0.938358		-100.781	-100.256	329.705	-0.91631		-689.273	-688.753	326.273	-4.34791		-689.259	-688.738	326.476	-4.14533		-689.105	-688.595	319.854	-10.767		-689.046	-688.539	317.897	-12.7243		-689.028	-688.505	328.245	-2.37585		-689.025	-688.502	328.576	-2.04486		-689.332	-688.804	331.163	0.542053		-689.331
1	0	Si	silyl_rad	-5.35089	-5.07163	175.236	-26.1377		-5.57163	-5.24933	202.247	0.873408		-291.234	-290.913	201.262	-0.111757		-291.23	-290.91	201.171	-0.203164		-291.215	-290.895	200.875	-0.498944		-291.197	-290.878	200.616	-0.758103		-291.222	-290.9	201.872	0.498229		-291.221	-290.899	201.675	0.301346		-291.238	-290.918	201.082	-0.291778		-291.238
0	1	Si	silylene_singlet	-4.71062	-4.40291	193.092	-21.8173		-4.96176	-4.6205	214.143	-0.765664		-290.62	-290.278	214.814	-0.094767		-290.617	-290.275	214.765	-0.143676		-290.603	-290.261	214.275	-0.633713		-290.585	-290.244	213.89	-1.01907		-290.61	-290.267	215.092	0.182843		-290.609	-290.267	214.98	0.0712125		-290.625	-290.282	214.709	-0.199605		-290.624
2	1	Si	silylene_triplet	-4.67374	-4.41516	162.261	-21.4768		-4.92951	-4.63679	183.683	-0.0543987		-290.587	-290.294	183.734	-0.00393665		-290.583	-290.291	183.716	-0.0217333		-290.57	-290.277	183.538	-0.199423		-290.552	-290.26	183.236	-0.502115		-290.576	-290.283	184.061	0.323355		-290.576	-290.282	183.949	0.211509		-290.591	-290.298	183.738	0.000372848		-290.591
1	2	Si	SiN	-13.4003	-13.0446	223.196	-14.7996		-13.6313	-13.2579	234.252	-3.74346		-344.158	-343.78	236.878	-1.11763		-344.153	-343.775	236.779	-1.21659		-344.126	-343.749	236.925	-1.07112		-344.101	-343.725	235.749	-2.24714		-344.122	-343.743	237.582	-0.413876		-344.121	-343.743	237.396	-0.599607		-344.168	-343.788	238.176	0.180521		-344.167
1	2	Si	SiP	-10.0064	-9.68933	198.956	-8.43215		-10.2688	-9.94036	206.07	-1.3184		-630.792	-630.461	207.711	0.32356		-630.786	-630.455	207.66	0.271754		-630.759	-630.426	208.792	1.4037		-630.724	-630.392	207.926	0.53799		-630.775	-630.441	209.443	2.05508		-630.775	-630.441	209.448	2.05983		-630.802	-630.47	208.446	1.05783		-630.802
0	1	Si	SiS	-13.7605	-13.4065	222.133	-12.3766		-13.9774	-13.5998	236.941	2.43195		-687.735	-687.361	234.642	0.133047		-687.728	-687.354	234.529	0.0196781		-687.698	-687.322	236.104	1.59523		-687.661	-687.285	235.67	1.16032		-687.713	-687.336	236.374	1.86471		-687.713	-687.336	236.443	1.93391		-687.744	-687.37	234.647	0.13737		-687.744
1	0	S	SN	-20.0551	-19.703	220.976	13.2596		-19.9113	-19.5718	212.996	5.2791		-452.903	-452.575	205.829	-1.88738		-452.897	-452.569	205.644	-2.07276		-452.866	-452.538	205.897	-1.82019		-452.837	-452.509	205.421	-2.29534		-452.859	-452.528	207.564	-0.152637		-452.858	-452.527	207.878	0.161032		-452.915	-452.585	207.027	-0.689919		-452.914
0	1	S	SO3	-58.1353	-57.6926	277.783	-2.46582		-57.7854	-57.3392	279.978	-0.270896		-623.907	-623.465	277.171	-3.07785		-623.896	-623.455	277.164	-3.08482		-623.782	-623.344	274.819	-5.4303		-623.732	-623.297	272.75	-7.49957		-623.733	-623.292	277.12	-3.12916		-623.732	-623.289	277.525	-2.7238		-623.939	-623.491	280.793	0.543618		-623.938
0	1	Na	sodiumfluoride	-24.5381	-24.2075	207.444	-34.4823		-24.4057	-24.0424	227.991	-13.9354		-262.217	-261.836	239.083	-2.84379		-262.201	-261.821	238.929	-2.99727		-262.165	-261.795	231.908	-10.0185		-262.137	-261.773	228.362	-13.5645		-262.148	-261.778	232.207	-9.71961		-262.146	-261.777	231.876	-10.0503		-262.232	-261.849	240.07	-1.85613		-262.232
0	1	Na	sodiumhydride	-0.736411	-0.486416	156.874	-16.3122		-0.748759	-0.48604	164.859	-8.32748		-162.858	-162.582	173	-0.186607		-162.846	-162.57	172.851	-0.33582		-162.849	-162.574	172.713	-0.473497		-162.835	-162.56	172.764	-0.422702		-162.852	-162.576	173.343	0.156081		-162.851	-162.574	173.812	0.625811		-162.861	-162.586	172.885	-0.301331		-162.861
0	1	S	sulfurdioxide	-42.1883	-41.7646	265.832	-12.0822		-41.9237	-41.4907	271.724	-6.19073		-548.694	-548.259	273.094	-4.82009		-548.686	-548.251	272.999	-4.91507		-548.607	-548.174	271.435	-6.47991		-548.567	-548.137	269.695	-8.21968		-548.575	-548.14	273.134	-4.78021		-548.574	-548.138	273.406	-4.50809		-548.717	-548.277	276.315	-1.59938		-548.717
2	1	S	sulfurmonoxide	-26.1914	-25.7863	254.217	14.9331		-25.9995	-25.6048	247.663	8.37904		-473.411	-473.033	237.074	-2.21066		-473.404	-473.027	236.993	-2.29152		-473.362	-472.983	238.021	-1.26324		-473.332	-472.954	237.249	-2.0352		-473.353	-472.969	240.589	1.30475		-473.352	-472.968	240.914	1.62918		-473.427	-473.045	239.296	0.0119614		-473.426
0	1	Cl	tetrachloroethylene	-71.4439	-71.0977	217.231	12.7491		-70.719	-70.3895	206.762	2.27965		-1917.05	-1916.72	206.501	2.01827		-1917.02	-1916.69	206.541	2.05881		-1916.94	-1916.61	205.474	0.991753		-1916.84	-1916.52	203.424	-1.05848		-1916.94	-1916.61	207.572	3.08936		-1916.94	-1916.61	207.736	3.25363		-1917.08	-1916.75	205.681	1.19822		-1917.08
0	1	Si	tetrachloro-silane	-63.8782	-63.4536	266.479	19.9399		-63.5626	-63.167	248.247	1.70814		-2130.58	-2130.18	248.287	1.74806		-2130.56	-2130.16	248.383	1.8438		-2130.46	-2130.07	248.493	1.95437		-2130.36	-2129.97	247.935	1.39585		-2130.5	-2130.1	249.77	3.23153		-2130.5	-2130.1	250.35	3.81119		-2130.61	-2130.21	248.387	1.84783		-2130.61
0	1	S	thiirane	-23.8745	-23.5501	203.582	0.535585		-23.7091	-23.3867	202.265	-0.780999		-476.788	-476.464	203.31	0.264193		-476.78	-476.456	203.236	0.189928		-476.746	-476.424	201.628	-1.41823		-476.715	-476.396	200.465	-2.58136		-476.733	-476.41	203.124	0.0773583		-476.725	-476.4	204.05	1.00372		-476.798	-476.474	203.052	0.00597684		-476.797
0	1	S	thiophene	-35.2135	-34.8948	199.999	-1.17323		-34.9664	-34.654	195.997	-5.17465		-553.013	-552.694	199.749	-1.4231		-553.002	-552.684	199.747	-1.42518		-552.95	-552.636	197.241	-3.93072		-552.909	-552.599	194.904	-6.26806		-552.923	-552.602	201.585	0.413202		-552.915	-552.593	202.152	0.980054		-553.03	-552.709	201.294	0.122263		-553.029
0	1	Cl	trichloro-borane	-48.0352	-47.6279	255.548	10.2055		-47.5268	-47.1322	247.623	2.28026		-1405.62	-1405.23	246.833	1.49073		-1405.6	-1405.21	246.881	1.53878		-1405.55	-1405.16	245.896	0.553075		-1405.48	-1405.09	244.915	-0.427875		-1405.56	-1405.17	247.871	2.52847		-1405.56	-1405.17	248.494	3.15129		-1405.64	-1405.25	246.182	0.839173		-1405.64
[truncated: 75 more columns]

## Sheet: AE2-GGA
			SBKJC					Stuttgart					6-311G(2df,2pd)-u					6-311G(2df,2pd)					6-31G(d,p)					6-31G(d,p)-u					pc-1-u X2C					pc-1-u					pc-1					pc-2-u
			E(Ha)	BE (kcal/mol)	Error (kcal/mol)	Error/atom		E(Ha)	BE (kcal/mol)	Error (kcal/mol)	Error/atom		E(Ha)	BE (kcal/mol)	Error (kcal/mol)	Error/atom		E(Ha)	BE (kcal/mol)	Error (kcal/mol)	Error/atom		E(Ha)	BE (kcal/mol)	Error (kcal/mol)	Error/atom		E(Ha)	BE (kcal/mol)	Error (kcal/mol)	Error/atom							E(Ha)	BE (kcal/mol)	Error (kcal/mol)	Error/atom		E(Ha)	BE (kcal/mol)	Error (kcal/mol)	Error/atom		E(Ha)	BE (kcal/mol)
		Error range			126.123	31.9464				334.113	47.6396				14.6564	4.0599				14.6221	3.84029				42.3814	10.448				36.3303	9.23653									42.4789	9.92479				43.1982	9.97783
		MaxAE			102.089	25.5222				181.502	30.9132				9.15068	2.49366				9.02479	2.44096				32.7964	8.19909				29.7589	7.43974									36.4996	8.62618				36.5855	8.53042
Element	#atoms	MAE			5.64229	1.36146				14.5824	3.24886				1.36454	0.347892				1.39713	0.343241				3.71447	0.867327				2.55426	0.622008									3.17644	0.806841				3.40913	0.871915
C	10	1,3-butadiene	-26.0277	403.364	-1.11515	-0.111515		-26.1892	409.35	4.87057	0.487057		-155.967	404.68	0.200891	0.0200891		-155.96	405.14	0.660742	0.0660742		-155.903	405.97	1.49124	0.149124		-155.926	403.34	-1.13885	-0.113885							-155.893	401.86	-2.61866	-0.261866		-155.883	402.856	-1.62345	-0.162345		-155.977	404.143
C	10	2-butyne	-26.0081	391.082	-7.37183	-0.737183		-26.1759	401.032	2.57792	0.257792		-155.958	399.476	1.02209	0.102209		-155.951	399.741	1.28749	0.128749		-155.893	399.959	1.50535	0.150535		-155.917	398.076	-0.377497	-0.0377497							-155.884	396.05	-2.4042	-0.24042		-155.872	395.949	-2.50433	-0.250433		-155.968	398.25
C	12	2-methyl-1-propene	-27.2486	439.609	2.15654	0.179712		-27.4062	443.667	6.21449	0.517874		-157.19	438.467	1.0148	0.0845663		-157.184	439.045	1.59301	0.132751		-157.129	442.167	4.71424	0.392853		-157.15	438.71	1.25757	0.104797							-157.115	435.848	-1.60455	-0.133712		-157.102	437.005	-0.447552	-0.037296		-157.2	437.179
C	7	acetaldehyde	-29.5801	255.249	0.0798756	0.0114108		-29.7434	250.704	-4.46556	-0.637938		-153.84	255.252	0.0824139	0.0117734		-153.834	255.506	0.336517	0.0480739		-153.776	255.962	0.79276	0.113251		-153.796	254.879	-0.290352	-0.0414788							-153.764	254.694	-0.475749	-0.0679642		-153.757	255.307	0.13707	0.0195814		-153.853	255.304
C	9	acetamide	-40.0898	278.147	3.63294	0.403661		-40.3104	276.533	2.01826	0.224251		-209.232	274.009	-0.505634	-0.0561816		-209.224	274.366	-0.148462	-0.0164958		-209.144	275.377	0.86274	0.09586		-209.171	273.464	-1.05075	-0.11675							-209.13	275.349	0.835149	0.0927943		-209.119	274.966	0.451838	0.0502042		-209.252	275.09
C	8	aceticacid	-45.5697	311.885	-1.22545	-0.153181		-45.8215	303.343	-9.76751	-1.22094		-229.12	313.282	0.171718	0.0214647		-229.111	313.634	0.523694	0.0654617		-229.022	313.008	-0.101851	-0.0127314		-229.051	312.263	-0.847062	-0.105883							-229.006	313.465	0.355277	0.0444096		-228.997	313.423	0.312889	0.0391111		-229.141	313.653
C	10	acetone	-36.409	375.612	1.57287	0.157287		-36.6102	371.215	-2.82437	-0.282437		-193.153	374.922	0.882447	0.0882447		-193.146	375.3	1.26091	0.126091		-193.075	377.312	3.27276	0.327276		-193.1	374.941	0.901589	0.0901589							-193.059	373.842	-0.197273	-0.0197273		-193.049	374.664	0.624415	0.0624415		-193.169	374.158
C	6	acetonitrile	-22.9076	203.004	2.16232	0.360387		-23.0389	204.44	3.59809	0.599682		-132.759	201.734	0.892271	0.148712		-132.754	201.675	0.833862	0.138977		-132.704	202.514	1.67242	0.278737		-132.725	201.749	0.907249	0.151208							-132.697	201.443	0.601794	0.100299		-132.69	201.274	0.432564	0.072094		-132.769	201.302
C	4	acetylene	-12.3488	149.349	-11.4154	-2.85385		-12.4432	160.628	-0.136364	-0.034091		-77.3317	160.468	-0.296222	-0.0740555		-77.328	160.396	-0.368241	-0.0920603		-77.2929	156.128	-4.63562	-1.1589		-77.3087	157.621	-3.14314	-0.785786							-77.2954	158.755	-2.0088	-0.5022		-77.2889	157.481	-3.28266	-0.820664		-77.3377	160.687
F	7	acetylfluoride	-53.1768	314.319	-1.92735	-0.275336		-53.4904	300.953	-15.2929	-2.18469		-253.143	317.481	1.23507	0.176438		-253.134	317.599	1.35245	0.193206		-253.035	317.581	1.33474	0.190678		-253.064	316.364	0.11731	0.0167585							-253.015	316.154	-0.0918861	-0.0131266		-253.008	316.641	0.39428	0.0563257		-253.168	316.53
C	7	acrylonitrile	-28.5069	281.786	0.484493	0.0692133		-28.6801	285.226	3.92526	0.560751		-170.841	282.282	0.981123	0.14016		-170.833	282.246	0.944677	0.134954		-170.77	282.802	1.50114	0.214449		-170.797	281.41	0.109033	0.0155761							-170.761	280.963	-0.337656	-0.0482366		-170.753	280.835	-0.465612	-0.066516		-170.853	281.691
C	7	allene	-19.1886	276.594	-6.6047	-0.943529		-19.3155	284.565	1.36645	0.195207		-116.65	283.208	0.00947852	0.00135407		-116.645	283.391	0.192623	0.0275176		-116.601	282.692	-0.507181	-0.0724544		-116.619	281.317	-1.88139	-0.26877							-116.595	280.556	-2.64277	-0.377538		-116.586	280.533	-2.66573	-0.380819		-116.659	283.062
N	4	ammonia	-11.6703	21.2525	3.66315	0.915787		-11.723	21.7803	4.19095	1.04774		-56.5551	14.6956	-2.89369	-0.723423		-56.5532	14.8342	-2.75518	-0.688794		-56.5264	13.4379	-4.15147	-1.03787		-56.5356	13.4627	-4.12662	-1.03165							-56.5256	15.4253	-2.164	-0.540999		-56.5186	14.211	-3.37834	-0.844586		-56.5646	17.4703
C	8	aziridine	-24.0609	196.838	7.1938	0.899225		-24.174	187.276	-2.36859	-0.296073		-133.91	189.438	-0.206021	-0.0257526		-133.904	189.724	0.0791195	0.00988993		-133.856	192.532	2.88778	0.360972		-133.874	189.468	-0.176252	-0.0220314							-133.844	188.617	-1.02748	-0.128435		-133.834	188.57	-1.07468	-0.134335		-133.92	189.485
B	2	b2	-5.27549	0	0	0		-5.29949	0	0	0		-49.4098	0	0	0		-49.4066	0	0	0		-49.3931	0	0	0		-49.3996	0	0	0							-49.3902	0	0	0		-49.3893	0	0	0		-49.4126	0
B	8	b2h6	-9.0794	197.238	-8.16389	-1.02049		-9.1131	204.881	-0.521598	-0.0651998		-53.2466	205.513	0.111069	0.0138836		-53.2438	206.053	0.65057	0.0813212		-53.2252	206.065	0.662919	0.0828649		-53.233	206.522	1.11959	0.139949							-53.2187	203.973	-1.42886	-0.178607		-53.2111	205.013	-0.38898	-0.0486225		-53.2499	205.295
Be	2	be2	-1.98699	0	0	0		-1.98966	0	0	0		-29.3306	0	0	0		-29.3276	0	0	0		-29.3222	0	0	0		-29.3264	0	0	0							-29.3185	0	0	0		-29.3184	0	0	0		-29.3316	0
Be	6	be2h4	-4.4868	108.824	-4.11563	-0.685938		-4.49253	111.779	-1.1597	-0.193283		-31.8498	112.746	-0.193524	-0.032254		-31.8468	112.91	-0.0287776	-0.00479626		-31.8336	110.148	-2.79164	-0.465273		-31.8431	113.288	0.348876	0.058146							-31.8296	110.137	-2.80192	-0.466987		-31.8266	111.839	-1.10032	-0.183386		-31.851	112.502
Be	3	bec2	-12.1449	127.888	-3.38195	-1.12732		-12.208	118.147	-13.1225	-4.37416		-90.781	131.435	0.16533	0.0551099		-90.7757	131.232	-0.0375501	-0.0125167		-90.7408	127.75	-3.51907	-1.17302		-90.7598	130.01	-1.25989	-0.419965							-90.7346	125.963	-5.30648	-1.76883		-90.7315	125.153	-6.11624	-2.03875		-90.7852	130.437
Be	9	be-ch32	-15.9035	296.643	1.69315	0.188128		-15.9805	297.258	2.30749	0.256388		-94.5522	295.831	0.881092	0.0978991		-94.5475	296.283	1.33267	0.148075		-94.5113	295.126	0.176142	0.0195713		-94.5289	296.256	1.30624	0.145138							-94.5035	292.508	-2.44242	-0.27138		-94.4918	291.602	-3.34837	-0.372041		-94.5568	294.483
Be	3	bef2	-49.5664	253.938	-8.92143	-2.97381		-49.8736	239.956	-22.9034	-7.63445		-214.669	267.558	4.69872	1.56624		-214.66	266.367	3.50753	1.16918		-214.562	257.085	-5.77452	-1.92484		-214.59	262.528	-0.331388	-0.110463							-214.534	252.013	-10.8466	-3.61553		-214.532	251.165	-11.6948	-3.89826		-214.687	261.607
Be	3	beh2	-2.22171	40.7989	0.0779178	0.0259726		-2.22368	41.714	0.993061	0.33102		-15.8999	40.7072	-0.0137801	-0.00459337		-15.8982	40.6343	-0.0867092	-0.0289031		-15.8922	39.6122	-1.10878	-0.369592		-15.8969	41.1733	0.452265	0.150755							-15.8912	40.2361	-0.484889	-0.16163		-15.8897	41.0918	0.370808	0.123603		-15.9006	40.6492
C	12	benzene	-37.3255	623.088	-0.989651	-0.0824709		-37.5654	629.848	5.77087	0.480906		-232.224	624.676	0.598273	0.0498561		-232.213	625.123	1.04528	0.0871066		-232.135	629.265	5.18764	0.432303		-232.166	623.406	-0.670914	-0.0559095							-232.115	619.988	-4.08934	-0.340778		-232.105	622.203	-1.87462	-0.156218		-232.238	623.506
Be	2	beo	-16.9655	45.6195	-3.72209	-1.86104		-17.0628	46.2359	-3.10563	-1.55281		-89.9327	50.2432	0.901608	0.450804		-89.928	49.805	0.463444	0.231722		-89.8886	45.0114	-4.33018	-2.16509		-89.906	49.4393	0.0977816	0.0488908							-89.869	38.7872	-10.5543	-5.27716		-89.8674	38.3414	-11.0002	-5.50008		-89.9361	47.4265
Be	5	beoh	-34.3026	217.895	-5.26848	-1.0537		-34.4967	220.245	-2.918	-0.5836		-166.567	224.009	0.846428	0.169286		-166.559	223.587	0.423719	0.0847438		-166.478	211.881	-11.2818	-2.25637		-166.507	218.269	-4.89416	-0.978832							-166.46	211.287	-11.8764	-2.37529		-166.451	208.475	-14.6876	-2.93753		-166.579	222.107
Be	2	berylliumhydride	-1.57613	0.653601	1.43644	0.718219		-1.57817	1.35361	2.13645	1.06822		-15.2488	-0.854846	-0.0720098	-0.0360049		-15.2472	-0.872407	-0.0895706	-0.0447853		-15.2422	-1.79724	-1.01441	-0.507203		-15.2457	-0.965956	-0.18312	-0.0915598							-15.2392	-2.47335	-1.69052	-0.845258		-15.2381	-2.25445	-1.47161	-0.735805		-15.2488	-1.23247
B	2	bf	-26.9174	122.704	-2.43585	-1.21793		-27.0725	109.549	-15.5908	-7.79539		-124.696	127.019	1.87856	0.939281		-124.692	126.965	1.82465	0.912323		-124.637	122.288	-2.85204	-1.42602		-124.652	124.24	-0.899983	-0.449991							-124.63	124.576	-0.564193	-0.282097		-124.626	122.276	-2.86377	-1.43189		-124.708	125.106
B	2	bh	-3.21502	-2.71239	2.48495	1.24247		-3.22679	-2.59477	2.60257	1.30128		-25.281	-5.54094	-0.343602	-0.171801		-25.2795	-5.43585	-0.238507	-0.119253		-25.2691	-7.18374	-1.9864	-0.993201		-25.2735	-6.47292	-1.27558	-0.637789							-25.2699	-5.69469	-0.497354	-0.248677		-25.2686	-5.39139	-0.194048	-0.0970239		-25.2827	-5.38519
B	4	bh3	-4.51218	81.353	-1.7122	-0.428051		-4.52882	85.0411	1.97586	0.493965		-26.5921	83.1675	0.102243	0.0255608		-26.5905	83.3496	0.284334	0.0710834		-26.5806	82.9148	-0.15043	-0.0376074		-26.5852	83.6156	0.550398	0.137599							-26.5788	82.8388	-0.226446	-0.0566115		-26.5749	83.2526	0.187402	0.0468506		-26.5938	83.063
C	10	bicyclobutane	-25.9832	375.416	1.79581	0.179581		-26.1185	365.023	-8.59724	-0.859724		-155.919	374.486	0.865749	0.0865749		-155.912	374.792	1.17153	0.117153		-155.86	378.869	5.24918	0.524918		-155.879	374.207	0.587022	0.0587022							-155.845	371.759	-1.86154	-0.186154		-155.835	372.577	-1.04347	-0.104347		-155.928	373.205
B	2	BN	-12.4858	-27.3193	7.97324	3.98662		-12.5517	-26.8468	8.44576	4.22288		-79.4264	-34.8835	0.409054	0.204527		-79.4227	-34.9626	0.329969	0.164985		-79.394	-34.9533	0.339285	0.169642		-79.4066	-34.627	0.66558	0.33279							-79.3912	-33.4032	1.88938	0.944691		-79.3889	-33.9741	1.31849	0.659245		-79.4324	-34.846
B	2	bo	-18.6897	95.7445	-3.95396	-1.97698		-18.7953	94.9201	-4.77831	-2.38916		-100.052	100.587	0.888154	0.444077		-100.048	100.432	0.734041	0.367021		-100.006	96.6869	-3.01155	-1.50578		-100.022	99.5837	-0.114709	-0.0573543							-100.004	101.304	1.60578	0.802888		-100	99.3066	-0.391785	-0.195893		-100.061	100.19
B	6	Boranamine	-15.0666	132.307	-0.181174	-0.0301957		-15.1449	141.617	9.12963	1.5216		-82.0332	132.822	0.334305	0.0557176		-82.0298	133.135	0.646817	0.107803		-81.9952	131.597	-0.890708	-0.148451		-82.0089	132.342	-0.145469	-0.0242449							-81.9933	133.811	1.32367	0.220612		-81.9842	132.454	-0.0338855	-0.00564758		-82.04	132.986
B	12	borazine	-41.7798	440.594	2.31151	0.192626		-42.0074	462.388	24.1055	2.00879		-242.659	441.887	3.60514	0.300428		-242.649	442.363	4.0805	0.340042		-242.56	443.834	5.55134	0.462612		-242.594	441.858	3.57624	0.29802							-242.545	444.261	5.97925	0.498271		-242.528	441.762	3.47976	0.28998		-242.675	439.806
B	7	boric-acid	-52.5932	321.725	-8.48606	-1.21229		-52.8834	318.395	-11.8154	-1.68791		-252.546	329.331	-0.879793	-0.125685		-252.538	329.855	-0.356155	-0.0508793		-252.428	321.51	-8.70121	-1.24303		-252.461	324.767	-5.44332	-0.777617							-252.416	329.677	-0.534311	-0.0763302		-252.404	326.42	-3.79123	-0.541604		-252.574	331.262
B	5	boron-trioxide	-53.5866	384.761	-13.6005	-2.7201		-53.8932	383.411	-14.9505	-2.99009		-275.614	402.814	4.45222	0.890443		-275.603	402.545	4.18339	0.836677		-275.489	394.667	-3.69431	-0.738862		-275.53	400.529	2.1672	0.43344							-275.477	403.794	5.43258	1.08652		-275.469	400.24	1.8788	0.375761		-275.635	400.253
C	2	c2	-10.9476	0	0	0		-11.0248	0	0	0		-75.9063	0	0	0		-75.9028	0	0	0		-75.8761	0	0	0		-75.8894	0	0	0							-75.8746	0	0	0		-75.8729	0	0	0		-75.9116	0
C	5	c2h3_rad	-12.9261	146.597	-1.23369	-0.246738		-13.0096	151.346	3.51539	0.703078		-77.8955	147.218	-0.612672	-0.122534		-77.8922	147.478	-0.352905	-0.070581		-77.861	146.196	-1.63457	-0.326913		-77.8737	145.678	-2.15307	-0.430614							-77.8589	145.948	-1.88237	-0.376474		-77.8533	146.137	-1.69416	-0.338831		-77.9019	147.622
C	7	c2h5_rad	-14.166	194.745	3.51367	0.501953		-14.2448	197.05	5.81936	0.831337		-79.1352	191.149	-0.0819809	-0.0117116		-79.132	191.55	0.31907	0.0455814		-79.1027	192.54	1.30909	0.187013		-79.1139	190.944	-0.287035	-0.041005							-79.0972	190.15	-1.08101	-0.15443		-79.0892	190.604	-0.627139	-0.0895913		-79.1411	191.019
C	3	carbondioxide	-37.5743	189.411	-7.19477	-2.39826		-37.7786	174.257	-22.3485	-7.44951		-188.643	198.062	1.45675	0.485582		-188.637	197.977	1.3716	0.4572		-188.559	193.999	-2.60701	-0.869003		-188.585	196.137	-0.468649	-0.156216							-188.549	198.056	1.45014	0.483379		-188.546	197.499	0.893256	0.297752		-188.66	197.396
F	4	carbonicdifluoride	-69.9201	237.602	-5.17787	-1.29447		-70.3406	211.811	-30.9692	-7.74229		-313.109	245.853	3.07333	0.768333		-313.1	245.889	3.10873	0.777182		-312.974	244.313	1.53333	0.383333		-313.006	243.777	0.996839	0.24921							-312.946	243.036	0.256403	0.0641008		-312.944	243.177	0.397063	0.0992656		-313.142	243.203
C	2	carbonmonoxide	-21.571	124.163	-2.37948	-1.18974		-21.687	113.169	-13.3731	-6.68653		-113.343	127.084	0.542017	0.271009		-113.339	127.094	0.551662	0.275831		-113.291	123.547	-2.99513	-1.49756		-113.309	125.579	-0.963035	-0.481517							-113.287	126.796	0.254251	0.127125		-113.284	125.921	-0.621071	-0.310535		-113.352	126.655
F	5	carbontetrafluoride	-102.302	308.567	-3.22609	-0.645217		-102.939	272.138	-39.6556	-7.93112		-437.613	317.009	5.21551	1.0431		-437.601	317.201	5.40724	1.08145		-437.428	319.132	7.33887	1.46777		-437.466	316.288	4.4944	0.898879							-437.382	312.464	0.670343	0.134069		-437.38	312.858	1.06463	0.212926		-437.662	312.252
C	3	cch_rad	-11.6401	69.579	-7.10009	-2.3667		-11.7302	77.916	1.23689	0.412295		-76.613	76.448	-0.231077	-0.0770257		-76.6094	76.4346	-0.24454	-0.0815134		-76.5767	73.1788	-3.50035	-1.16678		-76.5919	74.3229	-2.35621	-0.785403							-76.578	74.9526	-1.72648	-0.575493		-76.5735	74.1303	-2.5488	-0.849601		-76.6187	76.5991
C	2	ch_rad	-6.01445	-25.7097	10.9885	5.49424		-6.04509	-30.4504	6.24777	3.12388		-38.4779	-37.7205	-1.02234	-0.511169		-38.4763	-37.5992	-0.900968	-0.450484		-38.4605	-38.6383	-1.94011	-0.970055		-38.4669	-38.8269	-2.12875	-1.06437							-38.4605	-38.1195	-1.42133	-0.710666		-38.4589	-37.6495	-0.951313	-0.475657		-38.4817	-37.0926
C	8	ch3ch2o_rad	-30.1143	225.492	5.54779	0.693474		-30.2822	224.137	4.1928	0.5241		-154.368	219.503	-0.441886	-0.0552357		-154.362	219.918	-0.026804	-0.00335051		-154.305	221.883	1.93822	0.242278		-154.324	220.17	0.225285	0.0281606							-154.291	219.268	-0.676521	-0.0845651		-154.283	219.824	-0.12029	-0.0150363		-154.382	220.045
C	6	ch3co_rad	-28.943	220.369	0.99334	0.165557		-29.1015	212.606	-6.7704	-1.1284		-153.198	219.289	-0.0866778	-0.0144463		-153.192	219.486	0.109522	0.0182537		-153.132	218.775	-0.600617	-0.100103		-153.153	218.128	-1.24784	-0.207974							-153.122	218.524	-0.851696	-0.141949		-153.116	218.842	-0.534484	-0.0890807		-153.211	219.334
C	5	ch3o_rad	-23.2929	109.758	4.46724	0.893449		-23.4226	108.16	2.86854	0.573709		-115.061	103.985	-1.30618	-0.261235		-115.057	104.305	-0.985635	-0.197127		-115.013	104.687	-0.604159	-0.120832		-115.027	104.048	-1.24293	-0.248586							-115.003	104.215	-1.07609	-0.215219		-114.998	104.959	-0.331777	-0.0663553		-115.073	105.303
C	2	cyano_rad	-15.3792	8.60951	5.04222	2.52111		-15.4697	7.8482	4.28092	2.14046		-92.7368	4.14112	0.573835	0.286918		-92.7331	4.10852	0.541239	0.27062		-92.6979	4.17271	0.605424	0.302712		-92.7136	4.32905	0.761768	0.380884							-92.6946	5.03203	1.46474	0.732372		-92.6925	4.83949	1.27221	0.636106		-92.7437	3.92729
C	4	cyanogen	-30.9614	144.648	-0.71841	-0.179602		-31.1544	150.64	5.27364	1.31841		-185.696	147.744	2.37772	0.59443		-185.688	147.23	1.86388	0.465971		-185.618	147.694	2.32791	0.581979		-185.648	147.358	1.99222	0.498055							-185.608	147.579	2.21305	0.553264		-185.603	146.414	1.04799	0.261998		-185.708	146.469
C	12	cyclobutane	-27.2313	428.694	5.07512	0.422926		-27.3797	427.049	3.43074	0.285895		-157.169	425.337	1.71861	0.143217		-157.163	425.825	2.20663	0.183886		-157.111	431.213	7.59468	0.63289		-157.131	426.825	3.20633	0.267194							-157.095	423.334	-0.28445	-0.0237042		-157.082	424.053	0.434318	0.0361932		-157.178	423.339
C	10	cyclobutene	-26.0105	392.579	2.02418	0.202418		-26.1595	390.769	0.214985	0.0214985		-155.946	391.417	0.862153	0.0862153		-155.939	391.755	1.20009	0.120009		-155.886	395.475	4.92103	0.492103		-155.907	391.54	0.985478	0.0985478							-155.872	388.888	-1.66597	-0.166597		-155.862	389.85	-0.704944	-0.0704944		-155.955	390.193
C	9	cyclopropane	-20.4086	312.184	0.457718	0.0508575		-20.519	310.396	-1.32956	-0.147729		-117.867	312.518	0.791587	0.0879541		-117.862	312.871	1.14523	0.127247		-117.82	314.912	3.18604	0.354004		-117.836	312.169	0.44326	0.0492511							-117.81	310.419	-1.30728	-0.145253		-117.799	310.587	-1.13896	-0.126551		-117.874	311.434
C	7	cyclopropene	-19.1491	251.761	-4.01034	-0.572906		-19.2626	251.342	-4.42937	-0.632768		-116.607	256.183	0.410965	0.0587093		-116.602	256.277	0.505656	0.0722366		-116.56	257.179	1.40727	0.201039		-116.577	255.024	-0.747445	-0.106778							-116.552	253.768	-2.00382	-0.286261		-116.544	253.901	-1.87043	-0.267205		-116.615	255.567
F	3	difluorinemonoxide	-64.0656	-1.24771	0.877948	0.292649		-64.4867	-2.46921	-0.343558	-0.114519		-274.761	-2.07423	0.0514212	0.0171404		-274.753	-2.33353	-0.207872	-0.0692906		-274.644	-1.75132	0.374331	0.124777		-274.67	-1.59776	0.527895	0.175965							-274.618	-1.88813	0.237522	0.0791739		-274.616	-2.2491	-0.12344	-0.0411468		-274.796	-1.89431
F	5	difluoromethane	-55.1443	212.748	0.352215	0.0704429		-55.4809	194.345	-18.0513	-3.61027		-239.038	212.112	-0.283744	-0.0567488		-239.031	212.246	-0.150078	-0.0300156		-238.932	210.363	-2.03286	-0.406572		-238.955	209.332	-3.06423	-0.612845							-238.913	209.807	-2.58918	-0.517835		-238.909	210.347	-2.04865	-0.40973		-239.069	212.328
C	10	dimethylamine	-25.2871	236.34	8.6667	0.86667		-25.4142	236.114	8.44133	0.844133		-135.141	227.829	0.155889	0.0155889		-135.135	228.313	0.640288	0.0640288		-135.087	232.08	4.40728	0.440728		-135.104	228.908	1.23453	0.123453							-135.074	227.856	0.183233	0.0183233		-135.063	228.496	0.822636	0.0822636		-135.151	227.686
C	9	dimethylether	-30.7601	265.775	4.08554	0.453948		-30.9206	260.002	-1.68778	-0.187531		-155.02	261.945	0.25506	0.02834		-155.015	262.382	0.691926	0.0768807		-154.957	264.285	2.59548	0.288387		-154.975	261.988	0.29839	0.0331544							-154.942	260.799	-0.891016	-0.0990017		-154.932	261.756	0.0660924	0.0073436		-155.034	261.724
C	8	ethane	-14.8241	242.784	1.52859	0.191074		-14.9041	246.068	4.81251	0.601564		-79.8014	242.166	0.911225	0.113903		-79.7982	242.626	1.37071	0.171338		-79.7694	244.451	3.19563	0.399454		-79.7806	242.825	1.57009	0.196261							-79.7621	241.006	-0.24936	-0.0311699		-79.7528	241.487	0.23216	0.0290199		-79.806	241.118
C	6	ethanedial	-44.3237	259.92	-0.820412	-0.136735		-44.5715	248.352	-12.3874	-2.06457		-227.866	260.905	0.165399	0.0275665		-227.858	260.984	0.24395	0.0406584		-227.771	260.832	0.0918799	0.0153133		-227.8	260.167	-0.573305	-0.0955508							-227.755	261.293	0.553187	0.0921978		-227.75	261.934	1.19387	0.198978		-227.887	261.205
C	9	ethanol	-30.7723	273.453	1.49952	0.166613		-30.9393	271.784	-0.169035	-0.0187817		-155.034	270.707	-1.24582	-0.138425		-155.029	271.171	-0.78245	-0.0869389		-154.968	271.212	-0.741154	-0.0823504		-154.988	270.038	-1.91489	-0.212766							-154.956	269.86	-2.0933	-0.232589		-154.945	269.793	-2.15983	-0.239981		-155.05	271.833
C	10	ethylamine	-25.2959	241.877	6.99496	0.699496		-25.4263	243.743	8.86074	0.886074		-135.151	234.613	-0.268997	-0.0268997		-135.146	235.13	0.247235	0.0247235		-135.096	237.912	3.02944	0.302944		-135.115	235.258	0.375379	0.0375379							-135.085	234.768	-0.114828	-0.0114828		-135.073	234.835	-0.0471542	-0.00471542		-135.163	234.905
C	6	ethylene	-13.5993	204.087	-2.96674	-0.494456		-13.6839	209.803	2.74952	0.458253		-78.5754	206.872	-0.181695	-0.0302825		-78.5721	207.178	0.124404	0.0207339		-78.541	206.459	-0.59501	-0.0991684		-78.5535	205.822	-1.23145	-0.205241							-78.5378	205.548	-1.50627	-0.251044		-78.5309	205.803	-1.2508	-0.208467		-78.5814	206.896
C	7	ethyleneoxide	-29.5377	228.616	1.79964	0.257091		-29.6891	216.652	-10.1646	-1.45208		-153.793	226.205	-0.611517	-0.0873596		-153.788	226.51	-0.30641	-0.0437728		-153.731	227.859	1.04231	0.148901		-153.749	225.806	-1.01045	-0.14435							-153.716	224.791	-2.02614	-0.289448		-153.709	225.239	-1.57767	-0.225381		-153.808	226.674
F	2	f2	-48.1683	0	0	0		-48.4964	0	0	0		-199.577	0	0	0		-199.572	0	0	0		-199.491	0	0	0		-199.508	0	0	0							-199.473	0	0	0		-199.472	0	0	0		-199.604	0
F	6	fluoro-ethene	-37.1694	246.513	-3.77666	-0.629443		-37.4042	243.216	-7.07347	-1.17891		-177.849	250.541	0.25068	0.0417801		-177.843	250.774	0.484164	0.080694		-177.771	249.534	-0.75538	-0.125897		-177.792	248.387	-1.90291	-0.317151							-177.758	248.082	-2.2075	-0.367916		-177.752	248.404	-1.88598	-0.31433		-177.867	250.125
C	4	formaldehyde	-22.748	132.825	-0.286477	-0.0716192		-22.872	127.368	-5.74366	-1.43591		-114.521	132.532	-0.57936	-0.14484		-114.517	132.695	-0.416697	-0.104174		-114.472	131.845	-1.26647	-0.316618		-114.487	132.017	-1.09509	-0.273774							-114.464	132.473	-0.638795	-0.159699		-114.46	132.777	-0.334199	-0.0835497		-114.533	133.278
C	5	formicacid	-38.741	191.572	-2.28591	-0.457183		-38.9537	182.229	-11.6291	-2.32582		-189.805	193.323	-0.535118	-0.107024		-189.799	193.589	-0.269267	-0.0538534		-189.723	191.477	-2.3809	-0.476181		-189.747	191.933	-1.92545	-0.385091							-189.71	194.087	0.22943	0.045886		-189.705	193.895	0.0365242	0.00730483		-189.825	194.426
C	9	furan	-40.8096	432.076	-1.37482	-0.152758		-41.0486	426.63	-6.82008	-0.757787		-230.031	434.353	0.902505	0.100278		-230.022	434.643	1.19277	0.13253		-229.94	437.015	3.56491	0.396101		-229.969	432.731	-0.719342	-0.0799269							-229.92	431.334	-2.11675	-0.235194		-229.912	432.56	-0.889861	-0.0988735		-230.049	433.467
H	2	h2	-1.1632	0	0	0		-1.16237	0	0	0		-1.16974	0	0	0		-1.1696	0	0	0		-1.16791	0	0	0		-1.16807	0	0	0							-1.16782	0	0	0		-1.16503	0	0	0		-1.17006	0
C	5	h2coh_rad	-23.3011	114.931	1.98897	0.397793		-23.4275	111.261	-1.68075	-0.336149		-115.072	110.776	-2.16573	-0.433146		-115.068	111.103	-1.8385	-0.3677		-115.019	109.014	-3.92743	-0.785487		-115.034	108.855	-4.08694	-0.817389							-115.013	110.587	-2.35435	-0.470871		-115.007	110.287	-2.6553	-0.53106		-115.085	112.765
C	3	hco_rad	-22.1102	97.5756	0.463717	0.154572		-22.2303	89.362	-7.74983	-2.58328		-113.879	96.6661	-0.445773	-0.148591		-113.875	96.795	-0.316873	-0.105624		-113.829	94.8441	-2.26778	-0.755927		-113.845	95.4677	-1.64412	-0.54804							-113.823	96.4605	-0.65132	-0.217107		-113.82	96.6106	-0.501286	-0.167095		-113.89	97.1081
N	6	hydrazine	-22.1066	-1.88055	9.48918	1.58153		-22.2103	-2.45498	8.91474	1.48579		-111.871	-14.4744	-3.10472	-0.517453		-111.867	-14.1793	-2.8096	-0.468266		-111.82	-13.8527	-2.48302	-0.413836		-111.836	-14.8854	-3.51572	-0.585953							-111.815	-12.3022	-0.932472	-0.155412		-111.805	-13.9188	-2.54907	-0.424845		-111.886	-11.1159
C	3	hydrogencyanide	-16.0735	79.359	1.39405	0.464683		-16.1673	80.9395	2.9745	0.991501		-93.4402	78.468	0.50303	0.167677		-93.4361	78.3229	0.357925	0.119308		-93.3982	77.1847	-0.780267	-0.260089		-93.4147	77.8177	-0.147261	-0.0490869							-93.3963	78.9421	0.97717	0.325723		-93.3919	78.1528	0.187882	0.0626275		-93.4476	78.4781
F	2	hydrogenfluoride	-24.7596	58.8758	-3.12603	-1.56302		-24.911	51.2224	-10.7794	-5.3897		-100.464	57.0145	-4.98731	-2.49366		-100.462	57.1199	-4.88193	-2.44096		-100.41	50.4527	-11.5491	-5.77457		-100.421	51.802	-10.1998	-5.0999							-100.411	56.4429	-5.55889	-2.77945		-100.407	55.4808	-6.52106	-3.26053		-100.485	61.362
O	4	hydrogenperoxide	-33.011	30.8076	-0.280547	-0.0701367		-33.2027	32.5282	1.44005	0.360013		-151.588	27.7237	-3.36442	-0.841105		-151.584	27.9386	-3.14949	-0.787373		-151.519	24.4985	-6.58961	-1.6474		-151.538	26.3654	-4.72275	-1.18069							-151.51	29.3234	-1.76471	-0.441176		-151.504	27.7271	-3.36105	-0.840263		-151.61	31.4204
C	14	isobutane	-28.4606	470.177	4.99487	0.356776		-28.6158	473.296	8.11436	0.579597		-158.406	467.093	1.91126	0.136518		-158.399	467.796	2.61377	0.186698		-158.345	472.924	7.74193	0.552995		-158.366	468.858	3.67624	0.262589							-158.33	465.198	0.0161096	0.00115069		-158.314	466.404	1.22184	0.0872741		-158.414	464.91
C	12	isopropanol	-37.5945	389.629	3.08883	0.257402		-37.801	389.033	2.49251	0.207709		-194.341	386.455	-0.0857177	-0.00714314		-194.334	387.038	0.497495	0.041458		-194.261	388.912	2.37126	0.197605		-194.286	386.456	-0.0843027	-0.00702522							-194.245	385.418	-1.12251	-0.0935425		-194.231	385.689	-0.851203	-0.0709336		-194.358	386.623
C	10	isopropyl_rad	-20.9894	311.73	4.57074	0.457074		-21.1071	314.686	7.52682	0.752682		-118.444	307.711	0.551442	0.0551442		-118.439	308.263	1.10357	0.110357		-118.397	310.908	3.74861	0.374861		-118.413	308.083	0.923725	0.0923725							-118.387	306.123	-1.03619	-0.103619		-118.376	307.112	-0.0475871	-0.00475871		-118.452	306.876
C	5	ketene	-28.3611	220.202	-7.82706	-1.56541		-28.5288	217.925	-10.1036	-2.02073		-152.628	228.661	0.631917	0.126383		-152.622	228.655	0.626596	0.125319		-152.56	225.909	-2.12004	-0.424007		-152.582	226.508	-1.52059	-0.304118							-152.552	227.112	-0.916963	-0.183393		-152.546	226.598	-1.43082	-0.286165		-152.64	228.343
Li	2	li2	-0.418641	0	0	0		-0.418333	0	0	0		-14.9968	0	0	0		-14.9941	0	0	0		-14.9922	0	0	0		-14.9952	0	0	0							-14.9908	0	0	0		-14.9906	0	0	0		-14.9974	0
Li	4	li2c2	-11.6432	173.777	0.514601	0.12865		-11.7139	169.875	-3.38718	-0.846795		-91.1797	173.568	0.30549	0.0763726		-91.1729	173.193	-0.0696221	-0.0174055		-91.1352	167.46	-5.80195	-1.45049		-91.1575	171.21	-2.05234	-0.513086							-91.1356	169.565	-3.69762	-0.924405		-91.1322	168.639	-4.6229	-1.15572		-91.1836	172.346
Li	4	li2nh	-10.9285	22.9923	5.93362	1.4834		-10.9826	24.0419	6.98326	1.74582		-70.3879	18.2744	1.21576	0.303941		-70.3825	17.8491	0.790482	0.197621		-70.352	14.2161	-2.84258	-0.710646		-70.3692	17.5237	0.465088	0.116272							-70.3458	13.6598	-3.39881	-0.849702		-70.3418	12.7501	-4.30853	-1.07713		-70.3868	14.2158
Li	3	li2o	-16.459	88.4866	-2.19269	-0.730895		-16.5586	91.6175	0.938217	0.312739		-90.3322	92.9152	2.23594	0.745312		-90.3256	91.992	1.31272	0.437574		-90.2859	86.5392	-4.14	-1.38		-90.3059	92.0586	1.37932	0.459775							-90.2799	88.5952	-2.08405	-0.694685		-90.2785	88.3334	-2.34584	-0.781946		-90.3331	88.417
Li	4	li2o2	-32.3985	113.704	0.551367	0.137842		-32.5932	116.954	3.80158	0.950394		-165.557	116.349	3.19622	0.799054		-165.548	115.342	2.18943	0.547357		-165.476	107.937	-5.21525	-1.30381		-165.505	114.283	1.13062	0.282655							-165.467	112.968	-0.184255	-0.0460639		-165.464	112.68	-0.47279	-0.118198		-165.567	112.945
Li	5	lich3	-7.61049	114.549	2.58447	0.516894		-7.64531	113.05	1.08518	0.217037		-47.3848	112.123	0.158035	0.031607		-47.3816	112.178	0.213595	0.0427189		-47.3625	110.713	-1.25167	-0.250334		-47.3715	111.135	-0.829805	-0.165961							-47.3612	110.912	-1.05227	-0.210454		-47.3552	110.427	-1.53792	-0.307585		-47.3878	111.807
Li	4	linh2	-11.308	27.5334	4.67062	1.16765		-11.3615	28.3877	5.52496	1.38124		-63.48	21.8163	-1.04641	-0.261601		-63.4764	21.7192	-1.14352	-0.28588		-63.4459	18.0103	-4.8524	-1.2131		-63.4595	19.9762	-2.8865	-0.721625							-63.4426	18.8438	-4.01894	-1.00474		-63.4371	17.8487	-5.01402	-1.25351		-63.4846	21.4348
Li	3	lioh	-16.8167	79.3646	-2.38387	-0.794623		-16.9098	78.5876	-3.16078	-1.05359		-83.3999	81.1448	-0.60361	-0.201203		-83.3953	80.7211	-1.02734	-0.342445		-83.3507	72.0576	-9.69078	-3.23026		-83.3674	76.4135	-5.33495	-1.77832							-83.3495	76.7385	-5.00989	-1.66996		-83.3464	76.1989	-5.54957	-1.84986		-83.4069	80.5489
Li	2	lithiumfluoride	-24.4485	97.3052	-8.2672	-4.1336		-24.605	92.6429	-12.9295	-6.46477		-107.458	107.292	1.71938	0.859692		-107.452	106.243	0.670873	0.335437		-107.4	99.2981	-6.27435	-3.13718		-107.416	102.924	-2.64798	-1.32399							-107.393	101.101	-4.47185	-2.23593		-107.393	101.058	-4.51395	-2.25698		-107.467	104.363
Li	2	lithiumhydride	-0.782437	-5.32302	1.58675	0.793375		-0.781454	-5.58397	1.3258	0.662901		-8.07227	-6.91765	-0.00788151	-0.00394076		-8.07042	-7.18503	-0.275257	-0.137628		-8.06645	-8.54199	-1.63221	-0.816107		-8.06946	-7.64339	-0.733621	-0.36681							-8.06793	-7.13495	-0.225175	-0.112588		-8.06738	-6.53641	0.373358	0.186679		-8.07266	-6.95605
C	5	methane	-8.00968	131.44	0.874584	0.174917		-8.0501	133.613	3.04816	0.609631		-40.5014	131.03	0.46515	0.0930301		-40.4999	131.329	0.7637	0.15274		-40.4836	131.596	1.03096	0.206193		-40.4897	131.049	0.483508	0.0967016							-40.4805	130.273	-0.292601	-0.0585202		-40.4742	130.334	-0.23082	-0.046164		-40.5039	130.509
C	12	methoxy-ethane	-37.582	381.791	5.12263	0.426886		-37.7822	377.262	0.593677	0.0494731		-194.328	377.835	1.16659	0.0972158		-194.32	378.397	1.72894	0.144079		-194.25	381.705	5.03674	0.419728		-194.273	378.342	1.67435	0.139529							-194.231	376.23	-0.438488	-0.0365406		-194.218	377.394	0.725815	0.0604845		-194.343	376.773
C	4	methyl_rad	-7.34479	79.1749	3.76721	0.941802		-7.38285	79.6104	4.20266	1.05066		-39.827	74.8303	-0.577434	-0.144358		-39.8254	75.0589	-0.348867	-0.0872167		-39.8086	74.4937	-0.914058	-0.228514		-39.8148	74.0115	-1.39623	-0.349058							-39.8076	74.4298	-0.977935	-0.244484		-39.8024	74.3375	-1.07024	-0.26756		-39.8309	75.3023
C	6	methylalcohol	-23.9506	157.54	0.684782	0.11413		-24.0772	154.225	-2.63077	-0.438461		-115.726	154.618	-2.23698	-0.372829		-115.722	154.96	-1.89513	-0.315856		-115.675	153.712	-3.14305	-0.523841		-115.689	153.531	-3.32416	-0.554026							-115.666	154.136	-2.71945	-0.453242		-115.659	153.92	-2.93508	-0.48918		-115.74	156.617
C	7	methylamine	-18.476	127.097	5.94514	0.849306		-18.5662	127.481	6.32904	0.904149		-95.8454	119.768	-1.38464	-0.197806		-95.842	120.15	-1.00243	-0.143205		-95.8045	121.396	0.243684	0.034812		-95.818	119.924	-1.22789	-0.175413							-95.7978	120.226	-0.926762	-0.132395		-95.7885	119.916	-1.23681	-0.176688		-95.8556	121.083
C	3	methylene_singlet	-6.65382	10.5414	7.47846	2.49282		-6.68247	4.81343	1.75046	0.583485		-39.1256	1.7109	-1.35207	-0.450691		-39.124	1.90121	-1.16176	-0.387254		-39.1053	-0.417899	-3.48087	-1.16029		-39.112	-0.488384	-3.55136	-1.18379							-39.1058	0.448751	-2.61422	-0.871407		-39.1031	1.01831	-2.04466	-0.681553		-39.1296	2.39017
C	3	methylene_triplet	-6.66969	20.5018	7.38468	2.46156		-6.70684	20.1091	6.99192	2.33064		-39.1424	12.2622	-0.854959	-0.284986		-39.1409	12.4706	-0.646582	-0.215527		-39.1251	11.9675	-1.14968	-0.383227		-39.1307	11.2763	-1.84082	-0.613605							-39.1247	12.297	-0.820204	-0.273401		-39.1214	12.4913	-0.625843	-0.208614		-39.1466	13.0092
C	10	methylenecyclopropane	-25.9989	385.281	-1.01282	-0.101282		-26.1506	385.153	-1.14069	-0.114069		-155.939	387.047	0.75271	0.075271		-155.932	387.348	1.05438	0.105438		-155.877	389.46	3.16551	0.316551		-155.898	385.844	-0.450395	-0.0450395							-155.864	383.93	-2.36376	-0.236376		-155.854	384.492	-1.80191	-0.180191		-155.948	385.99
C	8	methylformate	-45.5499	299.416	1.27461	0.159326		-45.7953	286.901	-11.2403	-1.40504		-229.097	298.961	0.81969	0.102461		-229.089	299.3	1.15809	0.144762		-229.002	299.987	1.8458	0.230725		-229.029	298.623	0.481419	0.0601773							-228.982	298.82	0.678187	0.0847733		-228.975	299.606	1.46466	0.183083		-229.117	298.668
C	7	methylnitrite	-49.1222	133.847	5.15677	0.736682		-49.3855	123.191	-5.49898	-0.785569		-245.067	130.114	1.42406	0.203437		-245.058	130.315	1.625	0.232142		-244.967	133.225	4.53495	0.647851		-244.996	131.258	2.56811	0.366873							-244.944	131.603	2.91314	0.416163		-244.937	132.049	3.35931	0.479901		-245.089	129.532
N	2	n2	-19.7832	0	0	0		-19.8895	0	0	0		-109.554	0	0	0		-109.55	0	0	0		-109.506	0	0	0		-109.524	0	0	0							-109.499	0	0	0		-109.497	0	0	0		-109.563	0
N	2	nh_rad	-10.3575	-72.5933	12.8483	6.42416		-10.4157	-69.168	16.2736	8.13681		-55.2236	-86.8196	-1.37799	-0.688994		-55.2217	-86.7162	-1.27461	-0.637306		-55.2015	-85.0865	0.355114	0.177557		-55.2094	-85.709	-0.267447	-0.133724							-55.1978	-84.9847	0.456933	0.228467		-55.1958	-84.7827	0.658944	0.329472		-55.2308	-85.2648
N	3	nh2_rad	-11.0046	-31.4795	8.48821	2.8294		-11.0579	-30.8609	9.10678	3.03559		-55.8794	-42.3239	-2.35621	-0.785403		-55.8775	-42.1675	-2.19983	-0.733277		-55.8537	-42.2935	-2.32581	-0.775271		-55.8621	-42.649	-2.68135	-0.893783							-55.8508	-41.6293	-1.66166	-0.553885		-55.8467	-41.8568	-1.88908	-0.629692		-55.8877	-40.2239
O	2	nitricoxide	-25.76	-19.4023	2.0921	1.04605		-25.9027	-22.7764	-1.28195	-0.640974		-129.93	-21.7226	-0.228128	-0.114064		-129.926	-21.6133	-0.118856	-0.0594282		-129.875	-21.131	0.363419	0.181709		-129.892	-21.5845	-0.090035	-0.0450175							-129.864	-20.8351	0.659346	0.329673		-129.863	-20.455	1.03941	0.519703		-129.942	-21.3666
F	4	nitrogentrifluoride	-82.2083	40.3138	3.74506	0.936264		-82.7283	24.5111	-12.0577	-3.01442		-354.202	36.9651	0.396266	0.0990664		-354.191	36.431	-0.137807	-0.0344518		-354.053	39.683	3.11419	0.778548		-354.086	38.456	1.88718	0.471795							-354.017	36.2577	-0.311122	-0.0777805		-354.014	35.9346	-0.634157	-0.158539		-354.247	36.9889
C	7	nitro-methane	-49.123	134.355	3.46655	0.495221		-49.3871	124.166	-6.72202	-0.960289		-245.067	130.548	-0.340681	-0.0486687		-245.059	130.775	-0.113347	-0.0161924		-244.966	132.788	1.89965	0.271379		-244.995	130.552	-0.335852	-0.0479789							-244.945	132.346	1.45786	0.208266		-244.938	132.847	1.95924	0.279891		-245.092	131.62
O	3	nitrousoxide	-35.6634	-12.0083	-0.757999	-0.252666		-35.8571	-16.6948	-5.44445	-1.81482		-184.726	-9.64718	1.60316	0.534388		-184.719	-9.86437	1.38598	0.461992		-184.648	-9.14843	2.10191	0.700638		-184.671	-10.4829	0.767396	0.255799							-184.633	-8.76977	2.48057	0.826857		-184.631	-8.40109	2.84925	0.949751		-184.742	-10.3008
O	3	no2	-41.6882	-1.29798	-0.225797	-0.0752655		-41.9182	-9.42143	-8.34925	-2.78308		-205.15	-1.30711	-0.234927	-0.0783089		-205.143	-1.2353	-0.163118	-0.0543726		-205.064	-0.447288	0.624892	0.208297		-205.088	-1.51682	-0.444637	-0.148212							-205.045	-0.162594	0.909587	0.303196		-205.043	0.250649	1.32283	0.440943		-205.17	-0.808627
O	2	o2	-31.7987	0	0	0		-31.9885	0	0	0		-150.375	0	0	0		-150.37	0	0	0		-150.312	0	0	0		-150.328	0	0	0							-150.296	0	0	0		-150.294	0	0	0		-150.39	0
O	2	oh_rad	-16.4649	-10.086	2.78384	1.39192		-16.5637	-7.37009	5.49971	2.74985		-75.7457	-16.5884	-3.71859	-1.85929		-75.7435	-16.3822	-3.51244	-1.75622		-75.7102	-18.5049	-5.6351	-2.81755		-75.7205	-17.2412	-4.37141	-2.18571							-75.7077	-15.1112	-2.24145	-1.12072		-75.7051	-15.4505	-2.58072	-1.29036		-75.7592	-12.9099
O	3	ozone	-47.6429	-34.5784	-1.4183	-0.472767		-47.9174	-40.9802	-7.8201	-2.6067		-225.508	-33.8743	-0.714259	-0.238086		-225.5	-34.0547	-0.894668	-0.298223		-225.413	-34.1408	-0.980756	-0.326919		-225.438	-33.9405	-0.780373	-0.260124							-225.39	-33.4982	-0.338111	-0.112704		-225.387	-34.0732	-0.913104	-0.304368		-225.532	-33.0555
C	11	propane	-21.6417	356.073	3.05133	0.277393		-21.7597	359.551	6.52924	0.593567		-119.103	354.45	1.42834	0.129849		-119.098	355.048	2.0265	0.184227		-119.057	358.474	5.45229	0.495663		-119.073	355.678	2.65614	0.241467							-119.046	352.886	-0.136107	-0.0123733		-119.033	353.739	0.716932	0.0651757		-119.11	352.849
C	9	propene	-20.425	322.471	-0.0841741	-0.00935267		-20.5456	327.051	4.49531	0.499479		-117.883	322.945	0.389203	0.0432448		-117.878	323.408	0.8527	0.0947444		-117.835	324.507	1.95114	0.216793		-117.852	322.517	-0.0386922	-0.00429913							-117.827	320.987	-1.56883	-0.174314		-117.817	321.768	-0.787816	-0.0875351		-117.891	322.318
C	7	propyne	-19.1803	271.362	-8.92005	-1.27429		-19.3106	281.476	1.19374	0.170534		-116.646	280.555	0.272687	0.0389553		-116.641	280.656	0.37403	0.0534328		-116.594	278.657	-1.62532	-0.232189		-116.614	278.402	-1.87998	-0.268568							-116.591	277.99	-2.2926	-0.327514		-116.581	277.265	-3.01705	-0.431007		-116.654	280.139
C	11	pyridine	-40.9853	512.41	6.58627	0.598752		-41.2262	510.449	4.6246	0.420418		-248.275	506.729	0.905037	0.0822761		-248.264	507.06	1.23552	0.11232		-248.181	513.131	7.30658	0.664235		-248.213	506.635	0.810933	0.0737212							-248.158	503.891	-1.93347	-0.17577		-248.149	505.848	0.0237638	0.00216034		-248.292	505.703
C	10	pyrrole	-35.3478	409.669	4.02158	0.402158		-35.5581	412.754	7.10675	0.710675		-210.161	405.781	0.133161	0.0133161		-210.152	406.111	0.463531	0.0463531		-210.077	409.006	3.35897	0.335897		-210.104	403.794	-1.85324	-0.185324							-210.062	403.793	-1.85447	-0.185447		-210.052	405.101	-0.546589	-0.0546589		-210.176	405.513
C	13	spiropentane	-32.8091	493.942	2.40673	0.185133		-32.9896	488.205	-3.32942	-0.25611		-195.231	493.203	1.66844	0.128341		-195.222	493.603	2.06858	0.159122		-195.156	498.477	6.94228	0.534022		-195.181	492.792	1.25701	0.0966933							-195.138	489.762	-1.77326	-0.136405		-195.124	490.591	-0.943513	-0.0725779		-195.242	491.118
C	13	t-butyl_rad	-27.8132	428.937	6.41979	0.49383		-27.9687	431.955	9.43764	0.725973		-157.752	423.897	1.37998	0.106153		-157.745	424.569	2.05152	0.157809		-157.692	429.04	6.52243	0.501725		-157.712	424.85	2.33206	0.179389							-157.676	421.746	-0.771039	-0.0593107		-157.663	423.176	0.6581	0.0506231		-157.761	422.268
F	6	tetrafluoroethylene	-107.854	357.448	-6.81164	-1.13527		-108.534	324.15	-40.1093	-6.68488		-475.648	368.486	4.22631	0.704385		-475.634	368.558	4.29859	0.716431		-475.445	368.408	4.14876	0.691461		-475.488	365.21	0.950362	0.158394							-475.398	361.57	-2.68901	-0.448168		-475.394	361.812	-2.44782	-0.407971		-475.701	364.167
C	14	trans_butane	-28.4594	469.46	4.87406	0.348147		-28.6153	472.979	8.39254	0.599467		-158.405	466.643	2.05691	0.146922		-158.398	467.382	2.79601	0.199715		-158.345	472.488	7.90229	0.564449		-158.366	468.475	3.88896	0.277783							-158.329	464.65	0.0640122	0.0045723		-158.313	465.913	1.32711	0.0947938		-158.414	464.481
F	6	trifluoro-acetonitrile	-93.6015	319.952	-0.754347	-0.125725		-94.1854	295.723	-24.9832	-4.16387		-430.569	326.208	5.50113	0.916855		-430.555	325.904	5.19761	0.866268		-430.389	328.544	7.83716	1.30619		-430.433	325.758	5.05124	0.841873							-430.348	322.338	1.63113	0.271855		-430.343	322.114	1.40789	0.234649		-430.612	321.545
B	4	trifluoro-borane	-75.4533	353.369	-8.32073	-2.08018		-75.9115	324.586	-37.1042	-9.27605		-324.656	367.196	5.50572	1.37643		-324.647	367.287	5.59729	1.39932		-324.509	361.852	0.161722	0.0404304		-324.541	363.228	1.53761	0.384402							-324.481	361.359	-0.331312	-0.0828281		-324.475	358.808	-2.88166	-0.720414		-324.69	362.138
F	5	trifluoro-methane	-78.7264	262.655	-1.3205	-0.2641		-79.2131	235.275	-28.7014	-5.74028		-338.328	266.005	2.02919	0.405838		-338.318	266.132	2.15583	0.431166		-338.181	265.582	1.6061	0.321221		-338.212	263.745	-0.230923	-0.0461847							-338.15	262.845	-1.13045	-0.226091		-338.148	263.492	-0.483693	-0.0967387		-338.368	264.198
C	13	trimethylamine	-32.1003	346.918	11.3746	0.874968		-32.2635	345.63	10.0868	0.775906		-174.438	337.079	1.53557	0.118121		-174.431	337.619	2.07628	0.159714		-174.371	343.768	8.22478	0.632675		-174.392	338.765	3.222	0.247846							-174.353	336.664	1.12136	0.0862584		-174.339	338.107	2.56398	0.197229		-174.449	335.681
B	13	Trimethylborane	-25.0233	457.873	0.0586972	0.00451517		-25.1598	465.694	7.87978	0.606137		-144.56	459.339	1.52441	0.117263		-144.554	460.058	2.24328	0.17256		-144.502	461.527	3.71252	0.285578		-144.523	460.036	2.22149	0.170883							-144.491	457.286	-0.528479	-0.0406522		-144.476	457.578	-0.236081	-0.0181601		-144.568	457.523
O	3	water	-17.1469	52.9386	-2.60989	-0.869964		-17.2387	51.5121	-4.03637	-1.34546		-76.4368	50.0752	-5.47331	-1.82444		-76.4346	50.2834	-5.26509	-1.75503		-76.3969	45.925	-9.62354	-3.20785		-76.408	47.6528	-7.89565	-2.63188							-76.3961	50.4285	-5.11996	-1.70665		-76.3905	49.1079	-6.44064	-2.14688		-76.4525	55.0379
Cl	11	1-chloro-propane	-35.9302	362.208	7.11205	0.64655		-36.2108	361.904	6.80762	0.618874		-578.726	357.579	2.48313	0.22574		-578.715	358.12	3.02355	0.274868		-578.636	363.422	8.32631	0.756937		-578.674	359.979	4.8833	0.443936							-578.652	355.896	0.799522	0.0726838		-578.64	356.409	1.3129	0.119354		-578.738	355.579
Cl	7	acetylchloride	-43.8889	274.096	3.16093	0.451562		-44.2145	265.67	-5.26485	-0.752121		-613.485	272.738	1.80251	0.257501		-613.474	272.872	1.93702	0.276717		-613.378	275.244	4.30915	0.615594		-613.42	273.652	2.71664	0.388091							-613.394	272.45	1.51429	0.216327		-613.388	272.704	1.7688	0.252685		-613.504	271.859
Al	2	al2	-3.89538	0	0	0		-3.90848	0	0	0		-484.803	0	0	0		-484.795	0	0	0		-484.75	0	0	0		-484.779	0	0	0							-484.791	0	0	0		-484.791	0	0	0		-484.81	0
Al	8	al2h6	-7.52553	88.2037	-2.03745	-0.254682		-7.54107	91.2895	1.0483	0.131037		-488.455	89.5627	-0.678482	-0.0848102		-488.446	89.3542	-0.886959	-0.11087		-488.389	84.6299	-5.61124	-0.701405		-488.423	87.516	-2.72513	-0.340642							-488.436	88.7273	-1.5139	-0.189237		-488.434	92.5076	2.26646	0.283307		-488.465	90.5781
Al	5	al2o3	-51.9542	226.41	-7.0948	-1.41896		-52.2118	201.173	-32.3309	-6.46618		-710.732	229.907	-3.59757	-0.719515		-710.715	229.558	-3.94609	-0.789219		-710.556	212.345	-21.1597	-4.23193		-710.624	221.478	-12.0267	-2.40534							-710.594	225.129	-8.37567	-1.67513		-710.587	222.19	-11.3148	-2.26296		-710.768	234.307
Al	12	Al3P3H6	-29.0994	174.918	-2.20481	-0.183734		-29.2742	195.348	18.2255	1.51879		-1755.1	180.449	3.32621	0.277184		-1755.07	180.549	3.4262	0.285517		-1754.89	175.106	-2.01625	-0.168021		-1755	175.982	-1.14078	-0.0950647							-1755.04	176.311	-0.811335	-0.0676112		-1755.03	179.452	2.32972	0.194143		-1755.12	179.279
Al	2	alcl	-16.9305	76.8768	4.23932	2.11966		-17.0983	72.5278	-0.109663	-0.0548317		-702.721	73.3746	0.737147	0.368574		-702.711	73.4013	0.763807	0.381904		-702.648	73.9076	1.27016	0.635081		-702.686	73.8679	1.23041	0.615204							-702.699	73.9142	1.27676	0.638381		-702.699	74.0974	1.45991	0.729953		-702.73	72.9936
Al	2	alh	-2.53321	2.46254	0.129593	0.0647966		-2.54004	2.89359	0.560648	0.280324		-242.99	2.09804	-0.234905	-0.117452		-242.986	2.0304	-0.302544	-0.151272		-242.961	1.16023	-1.17271	-0.586357		-242.977	1.82543	-0.50751	-0.253755							-242.984	2.55033	0.217382	0.108691		-242.983	3.19107	0.858128	0.429064		-242.994	2.40212
Al	6	alh2ph2	-10.8551	53.3608	0.575404	0.0959006		-10.9105	58.8459	6.06042	1.01007		-586.191	53.7028	0.917362	0.152894		-586.184	53.6932	0.90778	0.151297		-586.12	50.5196	-2.26587	-0.377645		-586.156	51.5358	-1.24963	-0.208272							-586.169	51.584	-1.2014	-0.200233		-586.167	53.9363	1.15083	0.191805		-586.2	53.2703
Al	4	alh3	-3.73936	29.4121	0.253294	0.0633235		-3.74916	32.2329	3.07415	0.768537		-244.202	28.9115	-0.247342	-0.0618355		-244.198	28.7881	-0.370729	-0.0926823		-244.169	26.6537	-2.50512	-0.626279		-244.187	28.3874	-0.771428	-0.192857							-244.193	28.7894	-0.36944	-0.0923599		-244.192	30.5729	1.41413	0.353533		-244.207	29.4008
Al	10	al-ph2	-25.086	100.833	1.64945	0.164945		-25.2313	110.987	11.8035	1.18035		-1270.17	102.729	3.54602	0.354602		-1270.15	102.955	3.77142	0.377142		-1270.02	97.7637	-1.41972	-0.141972		-1270.09	97.1783	-2.00508	-0.200508							-1270.12	96.3929	-2.79052	-0.279052		-1270.12	99.85	0.66654	0.066654		-1270.19	100.396
Al	2	als	-12.0982	33.2161	5.76718	2.88359		-12.1999	30.4797	3.0307	1.51535		-640.654	28.4169	0.967983	0.483991		-640.646	28.3785	0.929576	0.464788		-640.584	28.0545	0.605571	0.302786		-640.62	28.776	1.32708	0.663542							-640.634	28.8859	1.43697	0.718484		-640.633	28.8493	1.40036	0.700178		-640.662	28.3562
Al	13	al-sih3	-18.8703	196.158	-3.59198	-0.276306		-18.2151	381.252	181.502	13.9617		-1116.32	200.34	0.589833	0.0453718		-1116.3	200.45	0.700557	0.053889		-1116.18	196.969	-2.78119	-0.213938		-1116.25	199.153	-0.596952	-0.0459194							-1116.27	200.239	0.488698	0.0375921		-1116.27	206.363	6.61276	0.508674		-1116.33	202.909
Al	4	aluminumtrichloride	-46.8403	195.559	8.41423	2.10356		-47.3117	170.625	-16.5197	-4.12991		-1623.31	189.224	2.07974	0.519935		-1623.29	189.386	2.24165	0.560412		-1623.14	190.302	3.15779	0.789446		-1623.23	189.438	2.29406	0.573515							-1623.25	188.301	1.15714	0.289285		-1623.25	188.679	1.53425	0.383562		-1623.33	188.157
Al	4	aluminumtrifluoride	-74.7118	321.092	-12.5098	-3.12746		-75.1467	281.095	-52.5063	-13.1266		-542.298	332.529	-1.07295	-0.268237		-542.284	331.724	-1.87749	-0.469372		-542.121	320.185	-13.417	-3.35426		-542.17	324.559	-9.04232	-2.26058							-542.119	321.883	-11.7185	-2.92963		-542.116	321.011	-12.5907	-3.14767		-542.341	332.518
Cl	3	becl2	-30.9792	166.284	6.38547	2.12849		-31.3118	163.089	3.19043	1.06348		-935.329	162.819	2.92047	0.97349		-935.317	162.785	2.88688	0.962293		-935.236	165.712	5.81311	1.9377		-935.283	165.289	5.39037	1.79679							-935.282	157.149	-2.74964	-0.916546		-935.28	156.779	-3.12006	-1.04002		-935.34	160.503
S	2	bes	-11.1376	29.2283	3.9015	1.95075		-11.243	32.0605	6.73362	3.36681		-412.914	26.7303	1.40351	0.701753		-412.909	26.621	1.29414	0.647072		-412.868	26.6251	1.2983	0.649152		-412.893	28.389	3.06219	1.5311							-412.885	21.1796	-4.14727	-2.07363		-412.884	20.8929	-4.43391	-2.21696		-412.918	25.1337
S	5	besh	-22.5502	124.533	1.19888	0.239776		-22.7658	134.604	11.2698	2.25395		-812.449	125.993	2.65972	0.531944		-812.44	126.021	2.68766	0.537533		-812.358	125.536	2.20222	0.440444		-812.401	125.884	2.5502	0.510041							-812.401	119.326	-4.00768	-0.801536		-812.399	119.983	-3.3509	-0.67018		-812.458	124.083
Si	3	besi2	-8.65674	49.8799	-5.16996	-1.72332		-8.02717	52.6653	-2.38457	-0.794858		-593.642	55.9791	0.92924	0.309747		-593.634	56.1115	1.06159	0.353863		-593.573	54.823	-0.226901	-0.0756337		-593.607	55.3455	0.295569	0.0985231							-593.613	52.619	-2.43093	-0.810311		-593.612	52.2453	-2.80461	-0.934871		-593.648	56.5177
S	11	C2H6O2S	-56.7115	237.242	-70.1452	-6.37684		-57.0248	205.371	-102.017	-9.27423		-628.475	300.4	-6.98687	-0.63517		-628.464	300.931	-6.45635	-0.586941		-628.309	284.539	-22.8478	-2.07707		-628.359	283.843	-23.5443	-2.14039							-628.305	275.645	-31.742	-2.88564		-628.293	275.503	-31.8843	-2.89857		-628.505	302.145
Si	9	C2H6Si	-18.642	259.108	-1.81061	-0.201178		-18.5291	340.669	79.7502	8.86113		-369.275	261.044	0.124576	0.0138418		-369.268	261.208	0.289467	0.032163		-369.205	259.396	-1.52336	-0.169262		-369.235	259.414	-1.505	-0.167222							-369.225	258.801	-2.11802	-0.235336		-369.219	261.105	0.186282	0.020698		-369.285	261.664
S	3	carbondisulfide	-25.84	107.382	-2.282	-0.760666		-26.0714	103.458	-6.20606	-2.06869		-834.544	111.544	1.87998	0.626661		-834.534	111.165	1.50137	0.500456		-834.446	112.379	2.71559	0.905195		-834.492	111.587	1.92342	0.641141							-834.495	108.961	-0.70271	-0.234237		-834.494	109.361	-0.302952	-0.100984		-834.557	111.301
S	2	carbonmonosulfide	-15.6579	54.3204	3.39909	1.69954		-15.7813	45.0581	-5.86323	-2.93162		-436.24	50.4926	-0.428711	-0.214356		-436.234	50.3229	-0.598415	-0.299207		-436.183	50.371	-0.550316	-0.275158		-436.21	50.6677	-0.253554	-0.126777							-436.208	49.4735	-1.44777	-0.723887		-436.208	49.7396	-1.18167	-0.590837		-436.249	51.1065
Cl	5	carbontetrachloride	-65.1157	125.841	10.814	2.16279		-65.7997	108.691	-6.33605	-1.26721		-1878.95	117.937	2.91018	0.582037		-1878.93	118.049	3.02194	0.604387		-1878.76	124.612	9.58505	1.91701		-1878.85	120.785	5.75774	1.15155							-1878.87	116.822	1.79508	0.359017		-1878.86	117.106	2.07843	0.415686		-1878.98	116.647
S	3	carbonylsulfide	-31.7084	149.159	-4.86778	-1.62259		-31.9275	140.403	-13.6246	-4.54154		-511.595	155.343	1.31548	0.438493		-511.586	154.919	0.892104	0.297368		-511.504	153.871	-0.156043	-0.0520142		-511.539	154.39	0.363259	0.121086							-511.523	153.958	-0.0694464	-0.0231488		-511.521	153.897	-0.130236	-0.0434121		-511.61	155.154
Cl	5	CF3Cl	-93.0047	262.404	0.799089	0.159818		-93.651	229.382	-32.2231	-6.44463		-797.944	265.51	3.90475	0.780949		-797.929	265.581	3.97553	0.795105		-797.757	268.551	6.94612	1.38922		-797.809	265.782	4.17698	0.835396							-797.751	261.805	0.199796	0.0399591		-797.748	261.886	0.280685	0.056137		-797.99	262.521
Mg	6	ch3mgcl	-23.1945	189.199	9.99068	1.66511		-23.3974	186.1	6.89137	1.14856		-700.285	180.62	1.4113	0.235217		-700.272	181.024	1.81616	0.302694		-700.197	180.699	1.49049	0.248415		-700.241	180.526	1.31735	0.219559							-700.235	174.217	-4.99148	-0.831913		-700.226	172.167	-7.04097	-1.1735		-700.295	178.597
P	7	CH3PH2	-15.0911	133.86	1.29712	0.185303		-15.1706	134.654	2.09051	0.298644		-382.455	133.932	1.36894	0.195563		-382.451	134.191	1.62739	0.232485		-382.398	132.826	0.262933	0.0375618		-382.424	132.41	-0.152745	-0.0218207							-382.421	131.251	-1.31184	-0.187406		-382.415	132.28	-0.283007	-0.0404295		-382.463	132.959
S	5	ch3s_rad	-17.4764	100.561	6.20335	1.24067		-17.6138	100.908	6.55027	1.31005		-438.067	95.7111	1.35305	0.270611		-438.061	95.8702	1.51212	0.302425		-438.01	97.5765	3.2184	0.643681		-438.036	96.9364	2.57832	0.515664							-438.032	94.9472	0.589178	0.117836		-438.027	94.8254	0.467325	0.093465		-438.075	95.1163
Cl	2	chlorinemonofluoride	-38.9583	8.6795	-5.1485	-2.57425		-39.2873	6.6395	-7.1885	-3.59425		-560.008	10.8886	-2.93944	-1.46972		-560	10.9184	-2.90957	-1.45479		-559.918	10.7502	-3.07783	-1.53892		-559.95	11.1058	-2.7222	-1.3611							-559.94	11.0875	-2.74049	-1.37025		-559.94	11.3602	-2.46778	-1.23389		-560.033	13.3815
Cl	2	chlorinemonoxide	-30.7164	-27.1713	-5.13575	-2.56787		-30.9816	-25.8181	-3.78249	-1.89124		-535.348	-25.8173	-3.78175	-1.89087		-535.341	-25.73	-3.69446	-1.84723		-535.269	-26.3559	-4.32031	-2.16016		-535.301	-25.996	-3.96039	-1.9802							-535.292	-26.2661	-4.23051	-2.11526		-535.291	-26.0375	-4.00188	-2.00094		-535.367	-23.0932
Cl	4	chlorinetrifluoride	-87.1433	19.1655	-30.7264	-7.68161		-87.7843	7.06793	-42.8241	-10.706		-759.633	40.7413	-9.15068	-2.28767		-759.62	40.8672	-9.02479	-2.2562		-759.443	32.2856	-17.6064	-4.40159		-759.495	33.9412	-15.9508	-3.98771							-759.452	34.7647	-15.1273	-3.78182		-759.45	34.9629	-14.9291	-3.73228		-759.689	45.9833
Cl	6	chloro-ethene	-27.8871	209.778	-0.806926	-0.134488		-28.1335	211.206	0.621341	0.103557		-538.2	211.52	0.935362	0.155894		-538.191	211.782	1.19697	0.199496		-538.123	213.036	2.45103	0.408505		-538.157	211.511	0.926122	0.154354							-538.147	209.816	-0.768567	-0.128094		-538.141	210.002	-0.582934	-0.0971556		-538.212	211.027
Cl	5	chloroform	-50.848	132.731	9.06213	1.81243		-51.3708	120.282	-3.38743	-0.677485		-1419.35	126.176	2.50692	0.501383		-1419.33	126.315	2.64601	0.529203		-1419.2	131.241	7.57167	1.51433		-1419.27	128.474	4.80446	0.960892							-1419.28	124.975	1.30575	0.261149		-1419.27	124.79	1.12095	0.22419		-1419.37	125.122
Cl	2	cl2	-29.7207	0	0	0		-30.057	0	0	0		-920.404	0	0	0		-920.393	0	0	0		-920.31	0	0	0		-920.356	0	0	0							-920.372	0	0	0		-920.371	0	0	0		-920.418	0
Cl	5	Cl2SO2	-71.6293	7.8094	-77.7874	-15.5575		-72.2174	-15.797	-101.394	-20.2787		-1469.11	79.3701	-6.22663	-1.24533		-1469.09	79.655	-5.94174	-1.18835		-1468.88	58.357	-27.2398	-5.44796		-1468.96	59.9193	-25.6774	-5.13548							-1468.95	55.9248	-29.6719	-5.93438		-1468.95	55.7362	-29.8605	-5.97211		-1469.15	80.0095
Cl	2	ClN	-24.6489	-64.65	7.66798	3.83399		-24.8702	-64.6455	7.67244	3.83622		-514.862	-73.8143	-1.49634	-0.74817		-514.854	-73.9249	-1.607	-0.803502		-514.795	-70.9492	1.36869	0.684347		-514.825	-72.4102	-0.0922846	-0.0461423							-514.819	-73.2754	-0.957428	-0.478714		-514.818	-72.8987	-0.58081	-0.290405		-514.875	-72.7627
S	9	dimethylsulfide	-24.923	243.585	3.51338	0.390376		-25.0932	241.089	1.01711	0.113013		-478.007	241.75	1.67819	0.186466		-478	242.099	2.02737	0.225263		-477.934	244.223	4.15118	0.461242		-477.965	242.29	2.21797	0.246441							-477.951	239.14	-0.932394	-0.103599		-477.94	238.879	-1.1932	-0.132578		-478.017	240.515
S	10	dimethylsulfoxide	-40.8126	237.49	-26.2171	-2.62171		-41.0566	221.732	-41.9746	-4.19746		-553.223	259.391	-4.31594	-0.431594		-553.213	259.83	-3.87702	-0.387702		-553.104	253.428	-10.2795	-1.02795		-553.145	252.496	-11.2114	-1.12114							-553.114	248.436	-15.2714	-1.52714		-553.102	247.867	-15.8398	-1.58398		-553.245	261.491
Si	8	disilane	-11.2534	112.971	-2.91893	-0.364867		-10.7976	227.224	111.334	13.9167		-582.581	116.061	0.170921	0.0213651		-582.574	116.109	0.218768	0.0273461		-582.509	113.473	-2.41707	-0.302134		-582.544	115.218	-0.672106	-0.0840133							-582.557	115.783	-0.107222	-0.0134028		-582.555	119.904	4.01443	0.501803		-582.59	117.867
S	9	ethanethiol	-24.92	241.699	1.49491	0.166101		-25.1023	246.79	6.58561	0.731734		-478.008	241.972	1.76766	0.196406		-478.001	242.364	2.15989	0.239988		-477.933	244.111	3.90702	0.434114		-477.965	242.436	2.23164	0.247961							-477.952	239.633	-0.571438	-0.0634931		-477.943	240.221	0.0171969	0.00191076		-478.018	240.714
Cl	8	ethylchloride	-29.1127	248.935	5.54497	0.693121		-29.3556	248.659	5.26983	0.658729		-539.424	245.351	1.96143	0.245179		-539.415	245.751	2.36166	0.295208		-539.349	249.399	6.00982	0.751227		-539.382	247.122	3.7328	0.4666							-539.369	244.109	0.719245	0.0899056		-539.36	244.333	0.942961	0.11787		-539.434	243.91
S	4	H2CS	-16.8858	94.9201	1.4942	0.373549		-17.0213	93.7578	0.331918	0.0829794		-437.48	94.5811	1.15523	0.288809		-437.474	94.6147	1.1888	0.2972		-437.422	95.272	1.84607	0.461518		-437.449	95.022	1.5961	0.399024							-437.446	93.0654	-0.360551	-0.0901377		-437.442	93.1726	-0.253319	-0.0633298		-437.488	94.0842
Cl	2	hydrogenchloride	-15.4745	20.4152	-0.187876	-0.0939381		-15.6508	25.7663	5.1632	2.5816		-460.821	21.4898	0.886698	0.443349		-460.816	21.6628	1.05974	0.529869		-460.773	21.0869	0.48385	0.241925		-460.796	21.1972	0.594113	0.297056							-460.803	20.614	0.0109563	0.00547815		-460.802	21.3012	0.698182	0.349091		-460.828	21.0301
S	3	hydrogensulfide	-11.2838	14.487	-3.0686	-1.02287		-11.3994	25.0856	7.52997	2.50999		-399.406	18.3623	0.8067	0.2689		-399.402	18.4187	0.863063	0.287688		-399.359	16.835	-0.720543	-0.240181		-399.381	17.3837	-0.171865	-0.0572884							-399.387	16.8228	-0.73277	-0.244257		-399.385	17.943	0.38744	0.129147		-399.411	18.1579
Cl	3	hypochlorousacid	-31.3646	14.6121	-2.61571	-0.871905		-31.6298	16.2099	-1.01787	-0.339291		-535.998	14.9941	-2.23371	-0.744571		-535.991	15.1674	-2.06042	-0.686808		-535.917	13.743	-3.48475	-1.16158		-535.949	14.5836	-2.64417	-0.88139							-535.942	15.217	-2.01081	-0.670271		-535.938	14.631	-2.5968	-0.865598		-536.017	17.401
P	4	li2ph	-7.55527	37.0433	3.07613	0.769032		-7.60952	45.3728	11.4056	2.8514		-357.003	35.6068	1.63965	0.409912		-356.997	35.3693	1.4021	0.350526		-356.955	31.2364	-2.73077	-0.682693		-356.979	32.6895	-1.27765	-0.319412							-356.979	30.4464	-3.52084	-0.880209		-356.977	30.2881	-3.67908	-0.919771		-357.006	33.111
S	4	li2s2	-20.7993	116.473	14.5279	3.63199		-20.9887	110.628	8.68295	2.17074		-811.577	104.91	2.96588	0.741471		-811.566	104.493	2.54833	0.637083		-811.481	99.9919	-1.95264	-0.488161		-811.527	101.864	-0.0808043	-0.0202011							-811.537	101.894	-0.0506149	-0.0126537		-811.535	100.896	-1.04886	-0.262216		-811.586	103.09
Si	4	li2si2	-8.10752	65.9643	-0.152071	-0.0380176		-7.46318	60.5117	-5.60469	-1.40117		-593.991	67.3515	1.23507	0.308767		-593.982	67.2208	1.10443	0.276107		-593.919	64.1858	-1.93058	-0.482645		-593.955	65.0274	-1.08904	-0.27226							-593.965	65.9827	-0.133685	-0.0334211		-593.964	65.418	-0.698355	-0.174589		-593.998	68.2282
Cl	2	licl	-15.1898	75.4225	6.0876	3.0438		-15.3567	74.6886	5.35364	2.67682		-467.814	70.9337	1.59881	0.799407		-467.806	70.6067	1.27177	0.635883		-467.761	69.113	-0.221884	-0.110942		-467.788	70.4992	1.16431	0.582156							-467.793	70.0442	0.709305	0.354652		-467.792	69.9034	0.568492	0.284246		-467.819	69.6948
P	4	liph2	-7.90214	21.0983	1.06788	0.26697		-7.95823	30.7429	10.7125	2.67811		-350.066	21.271	1.24053	0.310131		-350.062	21.2009	1.17045	0.292611		-350.019	16.7289	-3.30152	-0.825381		-350.043	18.3196	-1.71085	-0.427712							-350.046	17.5101	-2.52031	-0.630076		-350.045	18.2303	-1.8001	-0.450024		-350.071	20.1588
S	3	lish	-10.9571	43.07	6.00543	2.00181		-11.0645	48.3667	11.3022	3.76739		-406.351	38.5118	1.44725	0.482416		-406.346	38.266	1.20146	0.400487		-406.299	34.4456	-2.61894	-0.87298		-406.325	36.5823	-0.482269	-0.160756							-406.328	35.7076	-1.35699	-0.45233		-406.327	35.8546	-1.20998	-0.403327		-406.356	37.7008
S	6	methanethiol	-18.1015	127.83	-0.112089	-0.0186815		-18.245	132.293	4.35087	0.725146		-438.705	129.215	1.27241	0.212068		-438.7	129.445	1.50285	0.250475		-438.645	129.707	1.76497	0.294161		-438.671	129.087	1.14413	0.190688							-438.668	127.164	-0.778315	-0.129719		-438.662	127.491	-0.451518	-0.075253		-438.713	128.464
Cl	5	methylchloride	-22.2917	133.523	4.3871	0.877419		-22.4943	131.65	2.51386	0.502773		-500.118	130.568	1.43176	0.286351		-500.111	130.801	1.6652	0.333041		-500.057	132.863	3.72718	0.745437		-500.085	131.65	2.51394	0.502788							-500.081	129.427	0.290612	0.0581224		-500.076	129.341	0.204781	0.0409563		-500.126	129.613
Cl	5	methylenechloride	-36.5723	134.689	7.00734	1.40147		-36.9351	127.535	-0.147145	-0.0294289		-959.734	129.718	2.0358	0.40716		-959.721	129.898	2.21556	0.443111		-959.629	133.392	5.70941	1.14188		-959.679	131.472	3.7898	0.757961							-959.682	128.513	0.830408	0.166082		-959.677	128.251	0.568633	0.113727		-959.749	128.693
Si	8	methylsilane	-13.0465	182.718	-0.212013	-0.0265017		-12.8879	259.893	76.9632	9.62039		-331.198	183.231	0.300583	0.0375729		-331.193	183.392	0.462054	0.0577567		-331.144	181.804	-1.12633	-0.140791		-331.168	182.515	-0.414711	-0.0518389							-331.165	181.789	-1.14111	-0.142638		-331.159	183.802	0.872335	0.109042		-331.205	183.8
Mg	2	mg2	-1.62801	0	0	0		-1.63264	0	0	0		-400.174	0	0	0		-400.162	0	0	0		-400.128	0	0	0		-400.156	0	0	0							-400.164	0	0	0		-400.164	0	0	0		-400.181	0
Mg	6	mg2h4	-3.98777	20.9372	5.86715	0.977858		-3.99345	22.6291	7.55904	1.25984		-402.537	14.8586	-0.21154	-0.0352566		-402.526	15.1206	0.0504768	0.0084128		-402.482	11.8995	-3.17058	-0.52843		-402.512	12.7309	-2.33918	-0.389863							-402.51	6.44684	-8.62325	-1.43721		-402.503	5.40115	-9.66894	-1.61149		-402.543	14.0137
Mg	3	mgc2	-11.9185	98.4506	2.18623	0.728744		-11.9769	85.1566	-11.1077	-3.70257		-276.146	95.5911	-0.673242	-0.224414		-276.136	95.5984	-0.665972	-0.221991		-276.086	91.8266	-4.43769	-1.47923		-276.115	92.3978	-3.86657	-1.28886							-276.094	86.37	-9.89433	-3.29811		-276.088	83.6058	-12.6585	-4.21951		-276.153	94.4853
Mg	9	mg-ch32	-15.6355	241.115	5.62186	0.624651		-15.7127	241.228	5.73494	0.637216		-279.878	235.885	0.392036	0.0435596		-279.87	236.487	0.993695	0.110411		-279.817	234.486	-1.00744	-0.111938		-279.845	234.187	-1.30577	-0.145086							-279.83	232.174	-3.31864	-0.368738		-279.816	229.588	-5.90501	-0.656113		-279.886	234.795
Mg	3	mgcl2	-30.7451	132.013	14.0442	4.68138		-31.069	122.801	4.83176	1.61059		-1120.68	119.792	1.82272	0.607573		-1120.67	119.992	2.02283	0.674278		-1120.57	120.571	2.60236	0.867452		-1120.63	120.803	2.83419	0.944732							-1120.63	110.511	-7.45806	-2.48602		-1120.63	108.656	-9.3128	-3.10427		-1120.7	117.089
Mg	3	mgf2	-49.2912	193.868	-2.70893	-0.902978		-49.5859	171.42	-25.1566	-8.38554		-399.98	198.21	1.63288	0.544293		-399.969	197.935	1.35757	0.452523		-399.856	189.271	-7.30585	-2.43528		-399.893	192.258	-4.31919	-1.43973							-399.836	176.155	-20.4223	-6.80743		-399.831	173.631	-22.9462	-7.64874		-400.002	192.658
Mg	2	mgh	-1.36417	-19.7273	2.5831	1.29155		-1.36772	-18.6937	3.61672	1.80836		-200.636	-22.4947	-0.18424	-0.0921199		-200.63	-22.4641	-0.153686	-0.0768432		-200.611	-23.0707	-0.760309	-0.380154		-200.626	-22.8335	-0.523117	-0.261558							-200.626	-25.3212	-3.01083	-1.50541		-200.624	-25.2849	-2.97448	-1.48724		-200.639	-22.5571
Mg	3	mgh2	-1.97249	-2.95786	3.30286	1.10095		-1.97782	-0.544888	5.71583	1.90528		-201.247	-6.31985	-0.0591302	-0.0197101		-201.241	-6.26406	-0.00334149	-0.00111383		-201.22	-7.25406	-0.993347	-0.331116		-201.236	-6.55327	-0.292557	-0.0975191							-201.237	-8.46483	-2.20411	-0.734704		-201.233	-8.64397	-2.38325	-0.794417		-201.25	-6.47755
Mg	2	mgo	-16.7084	-3.12644	-1.90464	-0.952319		-16.8054	-3.24181	-2.02	-1.01		-275.27	-2.48293	-1.26113	-0.630567		-275.262	-2.47775	-1.25595	-0.627976		-275.208	-7.2388	-6.017	-3.0085		-275.234	-4.88838	-3.66658	-1.83329							-275.205	-15.6296	-14.4078	-7.20388		-275.203	-16.5359	-15.3141	-7.65706		-275.28	-3.03252
Mg	5	mgoh	-34.0179	151.85	0.128461	0.0256921		-34.2033	148.169	-3.55219	-0.710438		-351.87	149.661	-2.05999	-0.411999		-351.859	149.928	-1.79357	-0.358715		-351.761	136.756	-14.9655	-2.9931		-351.798	140.421	-11.3	-2.26001							-351.755	131.504	-20.2173	-4.04345		-351.745	127.326	-24.3949	-4.87897		-351.888	149.275
Mg	2	mgs	-10.9212	6.07283	9.42578	4.71289		-11.0189	3.44017	6.79311	3.39655		-598.29	-2.45389	0.899051	0.449525		-598.28	-2.43752	0.91542	0.45771		-598.223	-3.36324	-0.0102974	-0.00514871		-598.259	-2.2685	1.08444	0.54222							-598.258	-10.4924	-7.1395	-3.56975		-598.256	-11.6022	-8.24928	-4.12464		-598.297	-3.461
Mg	5	mgsh	-22.3155	89.8597	9.77632	1.95526		-22.5217	93.4429	13.3595	2.6719		-997.801	82.3986	2.31524	0.463048		-997.788	82.5278	2.44441	0.488883		-997.689	80.4533	0.369904	0.0739808		-997.745	81.0748	0.991408	0.198282							-997.75	72.4232	-7.66015	-1.53203		-997.746	72.0024	-8.08094	-1.61619		-997.812	79.7529
Na	2	na2	-0.383967	0	0	0		-0.347375	0	0	0		-324.603	0	0	0		-324.578	0	0	0		-324.56	0	0	0		-324.587	0	0	0							-324.594	0	0	0		-324.594	0	0	0		-324.609	0
Na	4	na2c2	-11.56	143.292	4.88273	1.22068		-11.6157	152.759	14.3502	3.58755		-400.729	137.698	-0.711043	-0.177761		-400.701	137.879	-0.529806	-0.132451		-400.649	133.5	-4.90919	-1.2273		-400.692	134.825	-3.58384	-0.895959							-400.68	132.891	-5.51758	-1.37939		-400.677	132.131	-6.27782	-1.56945		-400.739	136.925
Na	4	na2nh	-10.8303	-16.8403	8.99788	2.24947		-10.865	-5.18913	20.649	5.16225		-379.924	-25.6002	0.237904	0.0594761		-379.898	-25.5776	0.260501	0.0651252		-379.853	-28.0869	-2.24879	-0.562198		-379.89	-27.5286	-1.69047	-0.422617							-379.877	-31.5929	-5.75478	-1.4387		-379.873	-32.4135	-6.57533	-1.64383		-379.932	-27.2625
Na	3	na2o	-16.3414	36.4522	1.39191	0.46397		-16.4237	51.4815	16.4212	5.47375		-399.848	36.2576	1.19729	0.399097		-399.821	36.1234	1.06307	0.354357		-399.765	30.5075	-4.55282	-1.51761		-399.804	33.2789	-1.78138	-0.593792							-399.787	28.1565	-6.90381	-2.30127		-399.785	27.8164	-7.24393	-2.41464		-399.857	33.1378
Na	4	na2o2	-32.2777	59.681	6.87562	1.71891		-32.4611	78.5784	25.7731	6.44327		-475.064	54.0501	1.24471	0.311177		-475.034	54.0864	1.28102	0.320255		-474.947	47.0973	-5.7081	-1.42702		-474.996	50.3728	-2.43257	-0.608143							-474.966	47.8968	-4.90858	-1.22714		-474.964	47.4806	-5.32478	-1.33119		-475.079	50.2769
Na	4	na2ph	-7.48593	15.2924	6.16289	1.54072		-7.53144	40.9049	31.7754	7.94384		-666.569	10.2657	1.13622	0.284055		-666.541	10.3464	1.21686	0.304216		-666.486	8.42404	-0.705474	-0.176368		-666.533	8.96748	-0.162032	-0.0405081							-666.54	4.43189	-4.69762	-1.17441		-666.539	4.37404	-4.75547	-1.18887		-666.579	8.87678
Na	4	na2s2	-20.7164	86.1895	24.0337	6.00841		-20.909	105.13	42.9741	10.7435		-1121.12	64.6852	2.5294	0.63235		-1121.09	64.8139	2.65808	0.664519		-1120.99	63.5018	1.34603	0.336508		-1121.06	64.1683	2.01245	0.503112							-1121.07	60.6358	-1.52005	-0.380012		-1121.07	59.8868	-2.26905	-0.567262		-1121.13	62.4622
Na	4	na2si2	-8.04908	51.0521	3.35485	0.838711		-7.41236	73.1508	25.4535	6.36338		-903.567	48.3702	0.672941	0.168235		-903.536	48.5236	0.826279	0.20657		-903.461	48.0434	0.346109	0.0865272		-903.521	48.4979	0.800626	0.200157							-903.538	46.6647	-1.03255	-0.258138		-903.537	46.1172	-1.58009	-0.395022		-903.581	49.8266
Na	5	nach3	-7.57548	103.462	3.09628	0.619255		-7.59407	103.163	2.79684	0.559368		-202.169	100.298	-0.0677176	-0.0135435		-202.155	100.427	0.0611257	0.0122251		-202.127	98.6479	-1.71797	-0.343593		-202.149	99.5466	-0.819276	-0.163855							-202.144	98.9075	-1.45845	-0.291691		-202.138	98.5316	-1.83432	-0.366865		-202.175	99.8947
Na	2	nacl	-15.1547	64.2739	10.762	5.381		-15.3157	71.2034	17.6915	8.84576		-622.591	54.6109	1.09897	0.549486		-622.573	54.5925	1.08056	0.540281		-622.522	54.5144	1.00244	0.501221		-622.56	55.2374	1.72546	0.862728							-622.567	52.8134	-0.698521	-0.349261		-622.566	52.6042	-0.90777	-0.453885		-622.599	53.4159
Na	4	nanh2	-11.2589	7.58453	7.63245	1.90811		-11.3011	12.7561	12.804	3.20101		-218.244	-2.82199	-2.77408	-0.693521		-218.23	-2.66338	-2.61547	-0.653868		-218.191	-6.09949	-6.05158	-1.51289		-218.215	-5.26323	-5.21532	-1.30383							-218.204	-6.50861	-6.4607	-1.61518		-218.198	-7.63943	-7.59152	-1.89788		-218.254	-1.45945
Na	3	naoh	-16.7629	56.4657	1.77458	0.591527		-16.8466	61.1418	6.45071	2.15024		-238.155	51.3238	-3.36725	-1.12242		-238.141	51.5304	-3.16071	-1.05357		-238.088	42.6791	-12.012	-4.00399		-238.113	45.0567	-9.63439	-3.21146							-238.1	44.7011	-9.99002	-3.33001		-238.096	43.6287	-11.0623	-3.68744		-238.169	52.8044
Na	4	naph2	-7.88523	21.3682	3.15611	0.789027		-7.9237	31.3386	13.1265	3.28163		-504.867	19.3747	1.16261	0.290654		-504.851	19.4391	1.227	0.30675		-504.804	16.9178	-1.29432	-0.323579		-504.838	17.576	-0.636084	-0.159021							-504.847	16.6479	-1.56418	-0.391045		-504.845	17.5731	-0.638952	-0.159738		-504.874	18.4023
Na	3	nash	-10.9233	32.725	10.9599	3.65329		-11.0295	48.6971	26.932	8.97733		-561.13	22.9564	1.19132	0.397107		-561.113	22.9195	1.15439	0.384796		-561.062	21.1796	-0.585504	-0.195168		-561.098	22.2072	0.442146	0.147382							-561.102	18.4729	-3.29216	-1.09739		-561.101	18.4612	-3.30387	-1.10129		-561.137	22.0643
Cl	3	nitrosylchloride	-40.6527	0.879077	4.62379	1.54126		-40.9614	-3.83376	-0.0890498	-0.0296833		-590.164	-1.75763	1.98708	0.66236		-590.154	-1.6601	2.08461	0.69487		-590.065	0.715756	4.46047	1.48682		-590.104	0.044572	3.78928	1.26309							-590.083	0.151132	3.89584	1.29861		-590.082	0.597517	4.34223	1.44741		-590.181	-2.74746
P	2	p2	-12.992	0	0	0		-13.0754	0	0	0		-682.729	0	0	0		-682.723	0	0	0		-682.657	0	0	0		-682.696	0	0	0							-682.711	0	0	0		-682.71	0	0	0		-682.741	0
P	4	P4	-26.0505	41.7366	0.406525	0.101631		-26.1713	12.8984	-28.4316	-7.1079		-1365.53	42.9588	1.62877	0.407192		-1365.51	42.9557	1.62568	0.40642		-1365.37	34.3699	-6.96008	-1.74002		-1365.44	32.0633	-9.26672	-2.31668							-1365.47	32.4327	-8.89731	-2.22433		-1365.47	31.9122	-9.41782	-2.35445		-1365.54	39.9285
Cl	4	PCl3	-51.2144	86.1874	6.01569	1.50392		-51.7291	66.4399	-13.7318	-3.43296		-1722.1	81.4492	1.27753	0.319383		-1722.08	81.6169	1.44523	0.361308		-1721.92	78.6856	-1.48607	-0.371517		-1722	76.4674	-3.70427	-0.926068							-1722.04	76.9829	-3.18878	-0.797194		-1722.03	77.1177	-3.05399	-0.763496		-1722.12	79.2732
Cl	6	PCl5	-80.9437	91.6153	5.54762	0.924603		-81.7614	50.9274	-35.1403	-5.85672		-2642.51	87.6639	1.59618	0.266029		-2642.49	87.9938	1.92604	0.321006		-2642.23	81.052	-5.01574	-0.835956		-2642.36	76.9166	-9.15117	-1.5252							-2642.41	77.7519	-8.31578	-1.38596		-2642.41	77.8698	-8.1979	-1.36632		-2642.55	84.1261
P	6	PF5	-127.466	344.877	-20.7743	-3.46238		-128.136	224.461	-141.19	-23.5317		-840.888	363.962	-1.68885	-0.281475		-840.871	363.929	-1.72167	-0.286945		-840.609	347.27	-18.3805	-3.06342		-840.678	350.647	-15.0039	-2.50065							-840.574	335.917	-29.7335	-4.95558		-840.572	336.013	-29.6383	-4.93971		-840.958	361.914
P	2	PH	-7.02059	-35.7699	3.08802	1.54401		-7.07482	-27.6508	11.2072	5.60358		-341.889	-38.0108	0.847096	0.423548		-341.886	-37.9891	0.868852	0.434426		-341.853	-37.6481	1.2098	0.604901		-341.872	-37.6263	1.23168	0.615839							-341.879	-37.9411	0.916831	0.458416		-341.878	-37.3061	1.55187	0.775935		-341.895	-38.1048
P	3	ph2_rad	-7.64152	-11.0887	1.65022	0.550073		-7.69176	-5.21271	7.52622	2.50874		-342.515	-11.8591	0.879786	0.293262		-342.512	-11.8229	0.916041	0.305347		-342.476	-13.11	-0.371024	-0.123675		-342.495	-12.8223	-0.0833301	-0.0277767							-342.502	-13.1	-0.361097	-0.120366		-342.501	-11.8592	0.879783	0.293261		-342.521	-12.1974
P	4	phosphine	-8.26929	17.8823	0.322536	0.0806341		-8.31812	23.1342	5.57445	1.39361		-343.149	18.5038	0.944034	0.236008		-343.145	18.5695	1.00971	0.252427		-343.107	16.3656	-1.19415	-0.298538		-343.127	16.8577	-0.702073	-0.175518							-343.134	16.7009	-0.85885	-0.214712		-343.132	18.5153	0.955505	0.238876		-343.154	18.1389
P	4	phosphorustrifluoride	-79.1027	222.338	-11.2472	-2.8118		-79.5368	159.717	-73.8679	-18.467		-641.096	229.607	-3.9778	-0.994451		-641.085	229.649	-3.93549	-0.983873		-640.913	218.551	-15.0336	-3.75841		-640.962	220.836	-12.7488	-3.1872							-640.91	215.91	-17.6747	-4.41869		-640.908	216.132	-17.4529	-4.36322		-641.146	231.415
P	2	PN	-16.3584	-18.3339	5.28494	2.64247		-16.4344	-30.1447	-6.52589	-3.26295		-396.104	-23.7715	-0.152704	-0.0763522		-396.098	-23.908	-0.289181	-0.144591		-396.042	-25.209	-1.59021	-0.795106		-396.071	-24.4842	-0.865391	-0.432696							-396.065	-25.0242	-1.40541	-0.702705		-396.064	-24.9927	-1.37383	-0.686915		-396.114	-23.8327
P	2	PO	-22.4316	22.779	-2.08869	-1.04435		-22.5378	3.66349	-21.2042	-10.6021		-416.587	22.0434	-2.82425	-1.41213		-416.581	22.0843	-2.78336	-1.39168		-416.511	16.4535	-8.41419	-4.20709		-416.541	18.166	-6.70171	-3.35085							-416.532	18.1339	-6.73381	-3.3669		-416.531	18.1566	-6.71103	-3.35552		-416.603	23.825
Cl	5	POCl3	-67.1822	129.214	-4.66106	-0.932213		-67.7221	65.671	-68.2045	-13.6409		-1797.37	132.647	-1.22802	-0.245604		-1797.35	132.887	-0.987994	-0.197599		-1797.14	122.213	-11.6624	-2.33247		-1797.24	121.141	-12.7341	-2.54682							-1797.25	119.524	-14.3515	-2.8703		-1797.25	119.475	-14.4002	-2.88005		-1797.4	131.672
S	2	PS	-16.5876	-3.75203	1.52365	0.761824		-16.7238	-6.8697	-1.59401	-0.797007		-739.563	-5.14906	0.126619	0.0633094		-739.556	-5.17251	0.103172	0.0515859		-739.484	-5.6495	-0.373823	-0.186911		-739.523	-5.76777	-0.492093	-0.246046							-739.538	-5.64994	-0.374259	-0.187129		-739.538	-5.56434	-0.28866	-0.14433		-739.574	-5.32148
S	2	s2	-20.1951	0	0	0		-20.3941	0	0	0		-796.413	0	0	0		-796.405	0	0	0		-796.329	0	0	0		-796.37	0	0	0							-796.384	0	0	0		-796.384	0	0	0		-796.424	0
Cl	4	S2Cl2	-49.965	30.8901	-4.28372	-1.07093		-50.4903	24.6028	-10.571	-2.64276		-1716.87	35.2537	0.0798693	0.0199673		-1716.86	35.3681	0.194289	0.0485723		-1716.69	31.4244	-3.74946	-0.937365		-1716.78	30.9887	-4.18511	-1.04628							-1716.81	31.4649	-3.70893	-0.927232		-1716.8	31.2612	-3.91269	-0.978172		-1716.9	33.9481
Cl	2	SCl	-24.9421	-9.89601	2.71859	1.35929		-25.2095	-10.0864	2.52818	1.26409		-858.389	-12.3928	0.221781	0.11089		-858.38	-12.3837	0.230904	0.115452		-858.3	-12.4806	0.133976	0.0669882		-858.343	-12.4844	0.130224	0.0651119							-858.358	-12.4259	0.188657	0.0943287		-858.357	-12.4763	0.138247	0.0691233		-858.401	-12.4821
Cl	3	SCl2	-39.8422	15.0694	-1.70776	-0.569252		-40.2726	11.6379	-5.13923	-1.71308		-1318.64	16.9117	0.134582	0.0448606		-1318.62	16.9704	0.19326	0.0644201		-1318.5	14.7611	-2.01599	-0.671997		-1318.56	14.44	-2.33709	-0.779028							-1318.59	14.8052	-1.97193	-0.657308		-1318.59	14.6061	-2.17108	-0.723693		-1318.66	16.1346
S	7	SF6	-154.878	173.193	-101.314	-14.4735		-155.88	121.897	-152.611	-21.8015		-997.372	272.214	-2.29326	-0.327608		-997.353	272.75	-1.75778	-0.251112		-997.045	256.327	-18.1806	-2.59723		-997.122	258.523	-15.9845	-2.28349							-996.992	238.008	-36.4996	-5.21423		-996.988	237.922	-36.5855	-5.2265		-997.452	268.082
S	2	sh_rad	-10.6521	-16.9631	3.87442	1.93721		-10.7617	-10.3965	10.441	5.22048		-398.76	-19.9015	0.936008	0.468004		-398.756	-19.8829	0.954617	0.477308		-398.717	-19.9468	0.890686	0.445343		-398.738	-19.3952	1.4423	0.721151							-398.744	-19.8997	0.937809	0.468905		-398.744	-19.3029	1.53455	0.767273		-398.765	-19.9779
Si	2	si2	-7.58376	0	0	0		-6.94841	0	0	0		-578.887	0	0	0		-578.88	0	0	0		-578.824	0	0	0		-578.856	0	0	0							-578.869	0	0	0		-578.869	0	0	0		-578.892	0
Si	4	Si2H2	-8.73871	-5.17395	-6.27156	-1.56789		-8.13697	16.4293	15.3317	3.83292		-580.06	1.87865	0.781035	0.195259		-580.053	1.92223	0.824616	0.206154		-579.991	-0.539212	-1.63683	-0.409206		-580.026	1.27972	0.182109	0.0455273							-580.04	1.66802	0.570406	0.142601		-580.039	2.96069	1.86307	0.465769		-580.069	3.91186
Si	6	Si2H4	-10.0109	63.2323	-4.54484	-0.757473		-9.48125	130.579	62.8015	10.4669		-581.335	68.2816	0.504398	0.0840663		-581.329	68.358	0.580791	0.0967985		-581.265	65.6014	-2.17574	-0.362623		-581.299	67.2534	-0.52375	-0.0872917							-581.313	67.8576	0.0803965	0.0133994		-581.312	70.6292	2.85203	0.475339		-581.344	69.9712
Si	7	si2h5_rad	-10.6168	78.4787	-1.93504	-0.276434		-10.1269	171.043	90.6289	12.947		-581.94	80.7095	0.295742	0.0422488		-581.933	80.7813	0.367513	0.0525019		-581.869	78.4404	-1.97339	-0.281913		-581.903	79.855	-0.55879	-0.0798272							-581.917	80.4632	0.0494101	0.00705858		-581.916	83.8862	3.47239	0.496056		-581.949	82.3889
Si	2	SiCl	-18.7105	36.5985	2.72498	1.36249		-18.567	40.3465	6.47294	3.23647		-749.701	34.7098	0.836335	0.418167		-749.692	34.7566	0.883053	0.441526		-749.623	34.6633	0.789748	0.394874		-749.661	34.312	0.438481	0.219241							-749.676	34.9081	1.03454	0.517271		-749.676	35.1185	1.24497	0.622487		-749.711	34.7993
Si	3	SiCl2	-33.6869	109.397	5.13821	1.71274		-33.7106	112.532	8.27324	2.75775		-1210.02	105.686	1.42796	0.475988		-1210	105.799	1.54094	0.513646		-1209.89	105.391	1.13243	0.377478		-1209.95	104.346	0.0871704	0.0290568							-1209.97	105.06	0.801806	0.267269		-1209.97	105.467	1.20895	0.402984		-1210.03	104.937
Si	2	SiH	-4.34478	-18.0101	0.64187	0.320935		-4.06528	6.20156	24.8536	12.4268		-289.999	-18.3336	0.318417	0.159208		-289.996	-18.3201	0.331861	0.165931		-289.966	-18.9398	-0.287832	-0.143916		-289.983	-18.3873	0.264693	0.132346							-289.99	-17.9006	0.751367	0.375683		-289.99	-17.1955	1.4565	0.728249		-290.003	-17.7279
Si	5	silane	-6.21289	59.3733	-1.57892	-0.315783		-6.02936	144.584	83.6318	16.7264		-291.88	60.9392	-0.0130742	-0.00261483		-291.877	60.9444	-0.00783445	-0.00156689		-291.842	58.9938	-1.95847	-0.391695		-291.861	60.5698	-0.382407	-0.0764814							-291.867	60.6257	-0.326562	-0.0653124		-291.866	63.3684	2.41619	0.483238		-291.885	62.0554
Si	2	siliconmonoxide	-19.8287	86.2748	-3.39951	-1.69975		-19.627	99.5171	9.8428	4.9214		-364.77	87.6799	-1.99445	-0.997225		-364.765	87.6451	-2.02924	-1.01462		-364.701	83.3671	-6.30718	-3.15359		-364.729	85.694	-3.98035	-1.99017							-364.72	86.1295	-3.54482	-1.77241		-364.719	85.8883	-3.78598	-1.89299		-364.785	90.2124
Si	5	silicontetrafluoride	-100.781	409.814	-16.0178	-3.20357		-101.127	413.929	-11.9023	-2.38046		-689.273	423.705	-2.12682	-0.425364		-689.259	423.239	-2.59217	-0.518435		-689.046	409.404	-16.4271	-3.28542		-689.105	414.255	-11.5759	-2.31518							-689.028	405.462	-20.3697	-4.07393		-689.025	405.318	-20.5131	-4.10263		-689.332	424.821
Si	4	silyl_rad	-5.57163	21.9342	-0.26746	-0.066865		-5.35089	83.5345	61.3328	15.3332		-291.234	22.3776	0.17591	0.0439774		-291.23	22.4169	0.215195	0.0537987		-291.197	20.8834	-1.31827	-0.329568		-291.215	22.0553	-0.146351	-0.0365877							-291.222	22.2206	0.018957	0.00473926		-291.221	24.2658	2.06407	0.516016		-291.238	23.2929
Si	3	silylene_singlet	-4.96176	4.19185	-0.204295	-0.0680983		-4.71062	46.4597	42.0635	14.0212		-290.62	4.54721	0.151063	0.0503545		-290.617	4.56839	0.172248	0.057416		-290.585	3.11662	-1.27952	-0.426507		-290.603	4.06027	-0.335877	-0.111959							-290.61	4.57412	0.177974	0.0593247		-290.609	5.94655	1.5504	0.5168		-290.625	5.24429
Si	3	silylene_triplet	-4.92951	-16.0418	0.986598	0.328866		-4.67374	23.3189	40.3473	13.4491		-290.587	-16.6647	0.363739	0.121246		-290.583	-16.5956	0.432758	0.144253		-290.552	-17.3765	-0.348048	-0.116016		-290.57	-16.6715	0.356855	0.118952							-290.576	-16.4861	0.542293	0.180764		-290.576	-15.1129	1.91554	0.638513		-290.591	-15.8377
Si	2	SiN	-13.6313	-32.78	6.28772	3.14386		-13.4003	-11.7061	27.3616	13.6808		-344.158	-39.3117	-0.244023	-0.122011		-344.153	-39.3602	-0.292513	-0.146257		-344.101	-40.6094	-1.54173	-0.770863		-344.126	-40.0195	-0.951762	-0.475881							-344.122	-38.9231	0.144559	0.0722796		-344.121	-38.7668	0.300913	0.150456		-344.168	-37.8107
Si	2	SiP	-10.2688	-12.0005	-1.18363	-0.591816		-10.0064	-3.46282	7.35402	3.67701		-630.792	-9.78659	1.03025	0.515127		-630.786	-9.75096	1.06588	0.53294		-630.724	-10.6468	0.170039	0.0850196		-630.759	-10.4544	0.362455	0.181228							-630.775	-9.65159	1.16526	0.582628		-630.775	-9.65059	1.16625	0.583127		-630.802	-9.11451
Si	2	SiS	-13.9774	55.1803	2.62155	1.31078		-13.7605	55.9912	3.43247	1.71624		-687.735	53.2513	0.692597	0.346299		-687.728	53.2194	0.660714	0.330357		-687.661	52.9981	0.439419	0.21971		-687.698	53.544	0.985271	0.492635							-687.713	54.1176	1.55889	0.779443		-687.713	54.1602	1.60147	0.800734		-687.744	53.6753
S	2	SN	-19.9113	-48.8704	-0.232853	-0.116426		-20.0551	-54.38	-5.74238	-2.87119		-452.903	-50.4567	-1.81908	-0.90954		-452.897	-50.6088	-1.97127	-0.985633		-452.837	-50.787	-2.14937	-1.07468		-452.866	-50.8065	-2.16895	-1.08448							-452.859	-51.6873	-3.04968	-1.52484		-452.858	-51.3057	-2.66807	-1.33403		-452.915	-49.6543
S	4	SO3	-57.7854	-6.37554	-102.089	-25.5222		-58.1353	-27.9394	-123.653	-30.9132		-623.907	87.0142	-8.69915	-2.17479		-623.896	87.2954	-8.41791	-2.10448		-623.732	62.917	-32.7964	-8.19909		-623.782	65.9544	-29.7589	-7.43974							-623.733	61.2086	-34.5047	-8.62618		-623.732	61.5917	-34.1217	-8.53042		-623.939	89.1554
Na	2	sodiumfluoride	-24.4057	81.3296	0.473616	0.236808		-24.5381	72.9528	-7.90325	-3.95163		-262.217	79.3257	-1.53032	-0.765158		-262.201	79.2514	-1.60466	-0.80233		-262.137	69.7363	-11.1198	-5.55989		-262.165	73.257	-7.59901	-3.79951							-262.148	71.5243	-9.33171	-4.66585		-262.146	70.9877	-9.86837	-4.93418		-262.232	78.5754
Na	2	sodiumhydride	-0.748759	-15.577	1.80252	0.901258		-0.736411	-11.5855	5.79395	2.89698		-162.858	-17.7485	-0.369032	-0.184516		-162.846	-17.8767	-0.49716	-0.24858		-162.835	-18.105	-0.725488	-0.362744		-162.849	-17.934	-0.554461	-0.27723							-162.852	-18.2959	-0.916361	-0.45818		-162.851	-17.6634	-0.283916	-0.141958		-162.861	-17.7544
S	3	sulfurdioxide	-41.9237	17.24	-61.0256	-20.3419		-42.1883	1.70205	-76.5635	-25.5212		-548.694	70.8793	-7.38623	-2.46208		-548.686	71.0474	-7.21814	-2.40605		-548.567	57.0317	-21.2339	-7.07795		-548.607	59.1557	-19.1099	-6.36995							-548.575	54.9098	-23.3557	-7.78524		-548.574	55.1797	-23.0858	-7.69528		-548.717	72.6483
S	2	sulfurmonoxide	-25.9995	1.65381	-11.9231	-5.96153		-26.1914	0.0782943	-13.4986	-6.74928		-473.411	10.4962	-3.08071	-1.54035		-473.404	10.5439	-3.03295	-1.51647		-473.332	7.35747	-6.21939	-3.10969		-473.362	8.45765	-5.11921	-2.5596							-473.353	7.90181	-5.67505	-2.83752		-473.352	8.12834	-5.44852	-2.72426		-473.427	12.4751
Cl	6	tetrachloroethylene	-70.719	207.08	2.01207	0.335345		-71.4439	191.365	-13.7023	-2.28372		-1917.05	207.662	2.59481	0.432468		-1917.02	207.696	2.62885	0.438142		-1916.84	214.651	9.58359	1.59726		-1916.94	209.942	4.87448	0.812413							-1916.94	204.301	-0.766301	-0.127717		-1916.94	204.475	-0.592808	-0.0988013		-1917.08	206.412
Si	5	tetrachloro-silane	-63.5626	206.691	2.91818	0.583637		-63.8782	181.956	-21.8169	-4.36339		-2130.58	206.056	2.28302	0.456604		-2130.56	206.351	2.57858	0.515716		-2130.36	205.786	2.01344	0.402689		-2130.46	202.638	-1.13403	-0.226806							-2130.5	202.165	-1.60795	-0.321591		-2130.5	202.783	-0.989205	-0.197841		-2130.61	204.949
S	7	thiirane	-23.7091	211.777	2.88123	0.411604		-23.8745	205.756	-3.1391	-0.448443		-476.788	210.462	1.56674	0.22382		-476.78	210.623	1.72748	0.246782		-476.715	212.493	3.59763	0.513947		-476.746	210.504	1.6082	0.229743							-476.733	207.632	-1.26317	-0.180452		-476.725	207.095	-1.8005	-0.257215		-476.798	209.414
S	9	thiophene	-34.9664	406.075	-4.51736	-0.501929		-35.2135	402.872	-7.71979	-0.857755		-553.013	410.509	-0.0829065	-0.00921183		-553.002	410.68	0.0876944	0.00974382		-552.909	412.02	1.42832	0.158703		-552.95	408.15	-2.44155	-0.271284							-552.923	405.35	-5.24248	-0.582498		-552.915	406.283	-4.30911	-0.47879		-553.03	410.532
Cl	4	trichloro-borane	-47.5268	193.333	2.47913	0.619783		-48.0352	188.182	-2.67233	-0.668081		-1405.62	193.547	2.69268	0.67317		-1405.6	193.854	3.00036	0.750089		-1405.48	199.85	8.99574	2.24894		-1405.55	197.425	6.57138	1.64285							-1405.56	194.597	3.74301	0.935753		-1405.56	195.085	4.23085	1.05771		-1405.64	193.161
[truncated: 94 more columns]

## Sheet: AE-GGA
			SBKJC					Stuttgart					6-311G(2df,2pd)-u					6-311G(2df,2pd)					6-31G(d,p)					6-31G(d,p)-u					pc-1-u					pc-1					pc-2-u					pc-2
			E(Ha)	BE (kcal/mol)	Error (kcal/mol)	Error/atom		E(Ha)	BE (kcal/mol)	Error (kcal/mol)	Error/atom		E(Ha)	BE (kcal/mol)	Error (kcal/mol)	Error/atom		E(Ha)	BE (kcal/mol)	Error (kcal/mol)	Error/atom		E(Ha)	BE (kcal/mol)	Error (kcal/mol)	Error/atom		E(Ha)	BE (kcal/mol)	Error (kcal/mol)	Error/atom		E(Ha)	BE (kcal/mol)	Error (kcal/mol)	Error/atom		E(Ha)	BE (kcal/mol)	Error (kcal/mol)	Error/atom		E(Ha)	BE (kcal/mol)	Error (kcal/mol)	Error/atom		E(Ha)	BE (kcal/mol)
		Error range			137.18	34.3275				332.64	60.674				19.02	4.63667				18.61	4.6025				54.14	12.124				50.51	11.148									47.82	10.8095				10.6	2.78333
		MaxAE			134.56	33.4375				194.98	47.05				13.06	2.83				12.26	2.6725				34.17	8.13				34.62	7.97				42.15	10.5375				47.41	10.7275				10.4	2.74333
Element	#atoms	MAE			26.8396	5.35859				38.9745	8.42572				2.12506	0.484338				2.03776	0.461323				5.33894	1.21659				4.72294	1.07423				6.56282	1.61856				9.33463	2.10085				1.48973	0.397545
C	10	1,3-butadiene	-26.0277	942.44	-61.11	-6.111		-26.1892	956.88	-46.67	-4.667		-155.967	1005.91	2.36	0.236		-155.96	1006.06	2.51	0.251		-155.903	1010.5	6.95	0.695		-155.926	1009.63	6.08	0.608		-155.893	997.83	-5.72	-0.572		-155.883	991.46	-12.09	-1.209		-155.977	1002.87	-0.68	-0.068		-155.976	1002.31
C	10	2-butyne	-26.0081	930.16	-67.36	-6.736		-26.1759	948.57	-48.95	-4.895		-155.958	1000.71	3.19	0.319		-155.951	1000.66	3.14	0.314		-155.893	1004.49	6.97	0.697		-155.917	1004.36	6.84	0.684		-155.884	992.02	-5.5	-0.55		-155.872	984.55	-12.97	-1.297		-155.968	996.98	-0.54	-0.054		-155.967	996.32
C	12	2-methyl-1-propene	-27.2486	1086.54	-59.48	-4.95667		-27.4062	1097.6	-48.42	-4.035		-157.19	1149.28	3.26	0.271667		-157.184	1149.46	3.44	0.286667		-157.129	1157.78	11.76	0.98		-157.15	1156.15	10.13	0.844167		-157.115	1140.87	-5.15	-0.429167		-157.102	1132.9	-13.12	-1.09333		-157.2	1145.34	-0.68	-0.0566667		-157.199	1144.61
C	7	acetaldehyde	-29.5801	640.2	-37.31	-5.33		-29.7434	629.35	-48.16	-6.88		-153.84	680.19	2.68	0.382857		-153.834	679.99	2.48	0.354286		-153.776	682.93	5.42	0.774286		-153.796	682.12	4.61	0.658571		-153.764	673.82	-3.69	-0.527143		-153.757	669.5	-8.01	-1.14429		-153.853	676.87	-0.64	-0.0914286		-153.853	676.47
C	9	acetamide	-40.0898	822.14	-49.82	-5.53556		-40.3104	805.9	-66.06	-7.34		-209.232	874.09	2.13	0.236667		-209.224	873.9	1.94	0.215556		-209.144	875.1	3.14	0.348889		-209.171	874.47	2.51	0.278889		-209.13	866.08	-5.88	-0.653333		-209.119	859.33	-12.63	-1.40333		-209.252	870.98	-0.98	-0.108889		-209.251	870.42
C	8	aceticacid	-45.5697	758.33	-45.17	-5.64625		-45.8215	733.67	-69.83	-8.72875		-229.12	807.76	4.26	0.5325		-229.111	807.39	3.89	0.48625		-229.022	809.14	5.64	0.705		-229.051	808.03	4.53	0.56625		-229.006	799.21	-4.29	-0.53625		-228.997	793.86	-9.64	-1.205		-229.141	802.71	-0.79	-0.09875		-229.14	802.23
C	10	acetone	-36.409	922.3	-51.22	-5.122		-36.6102	913.35	-60.17	-6.017		-193.153	977.57	4.05	0.405		-193.146	977.39	3.87	0.387		-193.075	983.18	9.66	0.966		-193.1	981.54	8.02	0.802		-193.059	969.23	-4.29	-0.429		-193.049	962.83	-10.69	-1.069		-193.169	972.77	-0.75	-0.075		-193.167	972.15
C	6	acetonitrile	-22.9076	577.66	-43.08	-7.18		-23.0389	575.73	-45.01	-7.50167		-132.759	622.7	1.96	0.326667		-132.754	622.44	1.7	0.283333		-132.704	621.99	1.25	0.208333		-132.725	623.08	2.34	0.39		-132.697	616.51	-4.23	-0.705		-132.69	612.1	-8.64	-1.44		-132.769	620.28	-0.46	-0.0766667		-132.768	619.83
C	4	acetylene	-12.3488	364.96	-40.59	-10.1475		-12.4432	381.19	-24.36	-6.09		-77.3317	406.29	0.74	0.185		-77.328	406.11	0.56	0.14		-77.2929	402.85	-2.7	-0.675		-77.3087	405.19	-0.36	-0.09		-77.2954	402.22	-3.33	-0.8325		-77.2889	398.13	-7.42	-1.855		-77.3377	405.34	-0.21	-0.0525		-77.3372	405.04
F	7	acetylfluoride	-53.1768	666.36	-42.04	-6.00571		-53.4904	646.47	-61.93	-8.84714		-253.143	714.04	5.64	0.805714		-253.134	713.5	5.1	0.728571		-253.035	716.69	8.29	1.18429		-253.064	715.31	6.91	0.987143		-253.015	705.68	-2.72	-0.388571		-253.008	701.83	-6.57	-0.938571		-253.168	707.84	-0.56	-0.08		-253.167	707.4
C	7	acrylonitrile	-28.5069	710.32	-58.52	-8.36		-28.6801	713.6	-55.24	-7.89143		-170.841	771.37	2.53	0.361429		-170.833	771.12	2.28	0.325714		-170.77	770.09	1.25	0.178571		-170.797	770.95	2.11	0.301429		-170.761	763.24	-5.6	-0.8		-170.753	758.34	-10.5	-1.5		-170.853	768.28	-0.56	-0.08		-170.852	767.78
C	7	allene	-19.1886	653.94	-51.19	-7.31286		-19.3155	668.62	-36.51	-5.21571		-116.65	706.74	1.61	0.23		-116.645	706.71	1.58	0.225714		-116.601	708.32	3.19	0.455714		-116.619	708.24	3.11	0.444286		-116.595	700.28	-4.85	-0.692857		-116.586	695.16	-9.97	-1.42429		-116.659	704.76	-0.37	-0.0528571		-116.658	704.38
N	4	ammonia	-11.6703	288.15	-14.05	-3.5125		-11.723	278.91	-23.29	-5.8225		-56.5551	299.41	-2.79	-0.6975		-56.5532	299.38	-2.82	-0.705		-56.5264	297.27	-4.93	-1.2325		-56.5356	298.38	-3.82	-0.955		-56.5256	296.07	-6.13	-1.5325		-56.5186	291.67	-10.53	-2.6325		-56.5646	301.22	-0.98	-0.245		-56.5643	301.02
C	8	aziridine	-24.0609	679.35	-39.69	-4.96125		-24.174	664.97	-54.07	-6.75875		-133.91	719.98	0.94	0.1175		-133.904	719.99	0.95	0.11875		-133.856	723.09	4.05	0.50625		-133.874	721.95	2.91	0.36375		-133.844	712.73	-6.31	-0.78875		-133.834	706.68	-12.36	-1.545		-133.92	717.89	-1.15	-0.14375		-133.919	717.38
B	2	b2	-5.27549	57	-10.13	-5.065		-5.29949	58.08	-9.05	-4.525		-49.4098	67.71	0.58	0.29		-49.4066	67.73	0.6	0.3		-49.3931	70.3	3.17	1.585		-49.3996	69.58	2.45	1.225		-49.3902	66.46	-0.67	-0.335		-49.3893	65.93	-1.2	-0.6		-49.4126	67.13	0	0		-49.4125	67.06
B	8	b2h6	-9.0794	577.8	-23.23	-2.90375		-9.1131	582.17	-18.86	-2.3575		-53.2466	601.97	0.94	0.1175		-53.2438	602.27	1.24	0.155		-53.2252	609.61	8.58	1.0725		-53.233	609.55	8.52	1.065		-53.2187	597.57	-3.46	-0.4325		-53.2111	592.83	-8.2	-1.025		-53.2499	600.69	-0.34	-0.0425		-53.2492	600.24
Be	2	be2	-1.98699	4.45	-1.71	-0.855		-1.98966	4.78	-1.38	-0.69		-29.3306	6.12	-0.04	-0.02		-29.3276	6.41	0.25	0.125		-29.3222	6.75	0.59	0.295		-29.3264	6.62	0.46	0.23		-29.3185	4.96	-1.2	-0.6		-29.3184	4.88	-1.28	-0.64		-29.3316	5.96	-0.2	-0.1		-29.3314	5.88
Be	6	be2h4	-4.4868	328.98	-9.12	-1.52		-4.49253	329.37	-8.73	-1.455		-31.8498	338.03	-0.07	-0.0116667		-31.8468	338.31	0.21	0.035		-31.8336	339.06	0.96	0.16		-31.8431	342.21	4.11	0.685		-31.8296	333.19	-4.91	-0.818333		-31.8266	331.31	-6.79	-1.13167		-31.851	337.31	-0.79	-0.131667		-31.8504	336.99
Be	3	bec2	-12.1449	237.87	-31.77	-10.59		-12.208	234.7	-34.94	-11.6467		-90.781	270.74	1.1	0.366667		-90.7757	270.65	1.01	0.336667		-90.7408	266.77	-2.87	-0.956667		-90.7598	269.73	0.09	0.03		-90.7346	262.86	-6.78	-2.26		-90.7315	260.95	-8.69	-2.89667		-90.7852	268.65	-0.99	-0.33		-90.7845	268.21
Be	9	be-ch32	-15.9035	730.19	-31.62	-3.51333		-15.9805	733.02	-28.79	-3.19889		-94.5522	763.88	2.07	0.23		-94.5475	764.19	2.38	0.264444		-94.5113	767.39	5.58	0.62		-94.5289	769.43	7.62	0.846667		-94.5035	756.54	-5.27	-0.585556		-94.4918	749.28	-12.53	-1.39222		-94.5568	760.97	-0.84	-0.0933333		-94.5558	760.35
Be	3	bef2	-49.5664	298.19	-16.88	-5.62667		-49.8736	282.49	-32.58	-10.86		-214.669	323.43	8.36	2.78667		-214.66	321.9	6.83	2.27667		-214.562	315.82	0.75	0.25		-214.59	320.38	5.31	1.77		-214.534	304.34	-10.73	-3.57667		-214.532	302.89	-12.18	-4.06		-214.687	313.5	-1.57	-0.523333		-214.686	313.19
Be	3	beh2	-2.22171	150.88	-2.42	-0.806667		-2.22368	150.51	-2.79	-0.93		-15.8999	153.35	0.05	0.0166667		-15.8982	153.33	0.03	0.01		-15.8922	154.07	0.77	0.256667		-15.8969	155.63	2.33	0.776667		-15.8912	151.76	-1.54	-0.513333		-15.8897	150.83	-2.47	-0.823333		-15.9006	153.06	-0.24	-0.08		-15.9004	152.89
C	12	benzene	-37.3255	1269.93	-88.5	-7.375		-37.5654	1291.55	-66.88	-5.57333		-232.224	1362.15	3.72	0.31		-232.213	1362.27	3.84	0.32		-232.135	1369.43	11	0.916667		-232.166	1366.11	7.68	0.64		-232.115	1350.38	-8.05	-0.670833		-232.105	1344.16	-14.27	-1.18917		-232.238	1357.47	-0.96	-0.08		-232.237	1356.69
Be	2	beo	-16.9655	109.33	-11.15	-5.575		-17.0628	100.31	-20.17	-10.085		-89.9327	122.84	2.36	1.18		-89.928	122.28	1.8	0.9		-89.8886	117.55	-2.93	-1.465		-89.906	121.27	0.79	0.395		-89.869	107.89	-12.59	-6.295		-89.8674	107.03	-13.45	-6.725		-89.9361	117.9	-2.58	-1.29		-89.9357	117.67
Be	5	beoh	-34.3026	450.95	-20.9	-4.18		-34.4967	432.4	-39.45	-7.89		-166.567	475.73	3.88	0.776		-166.559	474.83	2.98	0.596		-166.478	464.67	-7.18	-1.436		-166.507	469.78	-2.07	-0.414		-166.46	456.05	-15.8	-3.16		-166.451	450.7	-21.15	-4.23		-166.579	469.5	-2.35	-0.47		-166.579	469.16
Be	2	berylliumhydride	-1.57613	56.81	-0.24	-0.12		-1.57817	56.95	-0.1	-0.05		-15.2488	57	-0.05	-0.025		-15.2472	57.08	0.03	0.015		-15.2422	57.12	0.07	0.035		-15.2457	57.92	0.87	0.435		-15.2392	54.53	-2.52	-1.26		-15.2381	53.83	-3.22	-1.61		-15.2488	56.46	-0.59	-0.295		-15.2484	56.21
B	2	bf	-26.9174	172.22	-11.05	-5.525		-27.0725	158.66	-24.61	-12.305		-124.696	187.28	4.01	2.005		-124.692	186.99	3.72	1.86		-124.637	185.12	1.85	0.925		-124.652	186.3	3.03	1.515		-124.63	182.73	-0.54	-0.27		-124.626	179.89	-3.38	-1.69		-124.708	183.12	-0.15	-0.075		-124.707	182.8
B	2	bh	-3.21502	79.71	-3.41	-1.705		-3.22679	79.65	-3.47	-1.735		-25.281	83.11	-0.01	-0.005		-25.2795	83.18	0.06	0.03		-25.2691	83.51	0.39	0.195		-25.2735	83.89	0.77	0.385		-25.2699	82.06	-1.06	-0.53		-25.2686	81.22	-1.9	-0.95		-25.2827	82.89	-0.23	-0.115		-25.2825	82.76
B	4	bh3	-4.51218	271.63	-9.25	-2.3125		-4.52882	273.69	-7.19	-1.7975		-26.5921	281.39	0.51	0.1275		-26.5905	281.46	0.58	0.145		-26.5806	284.69	3.81	0.9525		-26.5852	285.13	4.25	1.0625		-26.5788	279.63	-1.25	-0.3125		-26.5749	277.16	-3.72	-0.93		-26.5938	280.76	-0.12	-0.03		-26.5933	280.47
C	10	bicyclobutane	-25.9832	914.5	-58.19	-5.819		-26.1185	912.56	-60.13	-6.013		-155.919	975.72	3.03	0.303		-155.912	975.72	3.03	0.303		-155.86	983.4	10.71	1.071		-155.879	980.49	7.8	0.78		-155.845	967.73	-4.96	-0.496		-155.835	961.18	-11.51	-1.151		-155.928	971.94	-0.75	-0.075		-155.927	971.31
B	2	BN	-12.4858	106.29	-12.34	-6.17		-12.5517	99.72	-18.91	-9.455		-79.4264	119.32	0.69	0.345		-79.4227	119.21	0.58	0.29		-79.394	117.4	-1.23	-0.615		-79.4066	118.35	-0.28	-0.14		-79.3912	116.9	-1.73	-0.865		-79.3889	115.51	-3.12	-1.56		-79.4324	118.33	-0.3	-0.15		-79.4321	118.16
B	2	bo	-18.6897	185.73	-15.59	-7.795		-18.7953	175.64	-25.68	-12.84		-100.052	203.98	2.66	1.33		-100.048	203.57	2.25	1.125		-100.006	201	-0.32	-0.16		-100.022	202.9	1.58	0.79		-100.004	201.15	-0.17	-0.085		-100	198.52	-2.8	-1.4		-100.061	201.24	-0.08	-0.04		-100.06	201.01
B	6	Boranamine	-15.0666	481.63	-23.78	-3.96333		-15.1449	480.99	-24.42	-4.07		-82.0332	506.19	0.78	0.13		-82.0298	506.29	0.88	0.146667		-81.9952	506.12	0.71	0.118333		-82.0089	507.62	2.21	0.368333		-81.9933	502.21	-3.2	-0.533333		-81.9842	496.53	-8.88	-1.48		-82.04	505.01	-0.4	-0.0666667		-82.0393	504.57
B	12	borazine	-41.7798	1164.99	-63.57	-5.2975		-42.0074	1161.28	-67.28	-5.60667		-242.659	1233.24	4.68	0.39		-242.649	1233.36	4.8	0.4		-242.56	1234.15	5.59	0.465833		-242.594	1234.23	5.67	0.4725		-242.545	1222.31	-6.25	-0.520833		-242.528	1212.11	-16.45	-1.37083		-242.675	1227.6	-0.96	-0.08		-242.673	1226.47
B	7	boric-acid	-52.5932	696.47	-35.71	-5.10143		-52.8834	662.08	-70.1	-10.0143		-252.546	736.17	3.99	0.57		-252.538	735.78	3.6	0.514286		-252.428	730.78	-1.4	-0.2		-252.461	731.86	-0.32	-0.0457143		-252.416	726.33	-5.85	-0.835714		-252.404	719.07	-13.11	-1.87286		-252.574	731.44	-0.74	-0.105714		-252.573	730.87
B	5	boron-trioxide	-53.5866	626.22	-43.43	-8.686		-53.8932	596.53	-73.12	-14.624		-275.614	679.14	9.49	1.898		-275.603	678.09	8.44	1.688		-275.489	672.46	2.81	0.562		-275.53	675.68	6.03	1.206		-275.477	670.11	0.46	0.092		-275.469	664.91	-4.74	-0.948		-275.635	669.85	0.2	0.04		-275.634	669.41
C	2	c2	-10.9476	107.76	-27.53	-13.765		-11.0248	114.16	-21.13	-10.565		-75.9063	136.25	0.96	0.48		-75.9028	136.22	0.93	0.465		-75.8761	135.64	0.35	0.175		-75.8894	136.41	1.12	0.56		-75.8746	134.42	-0.87	-0.435		-75.8729	133.36	-1.93	-0.965		-75.9116	135.23	-0.06	-0.03		-75.9113	135.12
C	5	c2h3_rad	-12.9261	416.14	-31.22	-6.244		-13.0096	425.11	-22.25	-4.45		-77.8955	447.83	0.47	0.094		-77.8922	447.94	0.58	0.116		-77.861	448.46	1.1	0.22		-77.8737	448.82	1.46	0.292		-77.8589	443.94	-3.42	-0.684		-77.8533	440.44	-6.92	-1.384		-77.9019	446.99	-0.37	-0.074		-77.9015	446.74
C	7	c2h5_rad	-14.166	572.14	-28.12	-4.01714		-14.2448	577.22	-23.04	-3.29143		-79.1352	601.34	1.08	0.154286		-79.132	601.51	1.25	0.178571		-79.1027	605.89	5.63	0.804286		-79.1139	605.24	4.98	0.711429		-79.0972	597.18	-3.08	-0.44		-79.0892	592.2	-8.06	-1.15143		-79.1411	599.81	-0.45	-0.0642857		-79.1405	599.43
C	3	carbondioxide	-37.5743	366.27	-34.08	-11.36		-37.7786	334.7	-65.65	-21.8833		-188.643	405.26	4.91	1.63667		-188.637	404.63	4.28	1.42667		-188.559	400.15	-0.2	-0.0666667		-188.585	401.4	1.05	0.35		-188.549	398.5	-1.85	-0.616667		-188.546	396.67	-3.68	-1.22667		-188.66	399.99	-0.36	-0.12		-188.659	399.78
F	4	carbonicdifluoride	-69.9201	394.99	-32.62	-8.155		-70.3406	360.72	-66.89	-16.7225		-313.109	436.33	8.72	2.18		-313.1	435.6	7.99	1.9975		-312.974	436.66	9.05	2.2625		-313.006	435.06	7.45	1.8625		-312.946	426.71	-0.9	-0.225		-312.944	425.39	-2.22	-0.555		-313.142	427.22	-0.39	-0.0975		-313.142	426.9
C	2	carbonmonoxide	-21.571	239.53	-22.71	-11.355		-21.687	221.93	-40.31	-20.155		-113.343	264.75	2.51	1.255		-113.339	264.47	2.23	1.115		-113.291	260.53	-1.71	-0.855		-113.309	262.31	0.07	0.035		-113.287	260.62	-1.62	-0.81		-113.284	258.85	-3.39	-1.695		-113.352	261.76	-0.48	-0.24		-113.352	261.58
F	5	carbontetrafluoride	-102.302	446.5	-31.2	-6.24		-102.939	409.51	-68.19	-13.638		-437.613	490.76	13.06	2.612		-437.601	489.96	12.26	2.452		-437.428	497.67	19.97	3.994		-437.466	493.59	15.89	3.178		-437.382	479.36	1.66	0.332		-437.38	478.11	0.41	0.082		-437.662	477.69	-0.01	-0.002		-437.661	477.21
C	3	cch_rad	-11.6401	231.26	-35.46	-11.82		-11.7302	245.28	-21.44	-7.14667		-76.613	267.48	0.76	0.253333		-76.6094	267.4	0.68	0.226667		-76.5767	264.36	-2.36	-0.786667		-76.5919	266.31	-0.41	-0.136667		-76.578	263.89	-2.83	-0.943333		-76.5735	261.14	-5.58	-1.86		-76.6187	266.54	-0.18	-0.06		-76.6182	266.27
C	2	ch_rad	-6.01445	82.1	-3.59	-1.795		-6.04509	79.83	-5.86	-2.93		-38.4779	85.19	-0.5	-0.25		-38.4763	85.26	-0.43	-0.215		-38.4605	84.72	-0.97	-0.485		-38.4669	84.96	-0.73	-0.365		-38.4605	83.61	-2.08	-1.04		-38.4589	82.68	-3.01	-1.505		-38.4817	85.23	-0.46	-0.23		-38.4815	85.13
C	8	ch3ch2o_rad	-30.1143	664.37	-32.66	-4.0825		-30.2822	655.99	-41.04	-5.13		-154.368	699.24	2.21	0.27625		-154.362	699.15	2.12	0.265		-154.305	704.39	7.36	0.92		-154.324	702.99	5.96	0.745		-154.291	692.92	-4.11	-0.51375		-154.283	687.66	-9.37	-1.17125		-154.382	696.33	-0.7	-0.0875		-154.381	695.87
C	6	ch3co_rad	-28.943	551.4	-35.56	-5.92667		-29.1015	538.05	-48.91	-8.15167		-153.198	589.44	2.48	0.413333		-153.192	589.22	2.26	0.376667		-153.132	590.2	3.24	0.54		-153.153	589.8	2.84	0.473333		-153.122	583.13	-3.83	-0.638333		-153.116	579.39	-7.57	-1.26167		-153.211	586.19	-0.77	-0.128333		-153.21	585.81
C	5	ch3o_rad	-23.2929	386.91	-18.32	-3.664		-23.4226	376.52	-28.71	-5.742		-115.061	406.02	0.79	0.158		-115.057	405.93	0.7	0.14		-115.013	408.3	3.07	0.614		-115.027	407.51	2.28	0.456		-115.003	401.61	-3.62	-0.724		-114.998	398.83	-6.4	-1.28		-115.073	404.55	-0.68	-0.136		-115.073	404.29
C	2	cyano_rad	-15.3792	167.6	-23.97	-11.985		-15.4697	162.45	-29.12	-14.56		-92.7368	192.61	1.04	0.52		-92.7331	192.52	0.95	0.475		-92.6979	189.2	-2.37	-1.185		-92.7136	190.72	-0.85	-0.425		-92.6946	189.32	-2.25	-1.125		-92.6925	188.04	-3.53	-1.765		-92.7437	191.15	-0.42	-0.21		-92.7434	190.99
C	4	cyanogen	-30.9614	462.64	-58.74	-14.685		-31.1544	459.85	-61.53	-15.3825		-185.696	524.68	3.3	0.825		-185.688	524.06	2.68	0.67		-185.618	517.75	-3.63	-0.9075		-185.648	520.14	-1.24	-0.31		-185.608	516.15	-5.23	-1.3075		-185.603	512.82	-8.56	-2.14		-185.708	520.92	-0.46	-0.115		-185.708	520.5
C	12	cyclobutane	-27.2313	1075.63	-56.56	-4.71333		-27.3797	1080.99	-51.2	-4.26667		-157.169	1136.15	3.96	0.33		-157.163	1136.24	4.05	0.3375		-157.111	1146.82	14.63	1.21917		-157.131	1144.26	12.07	1.00583		-157.095	1128.35	-3.84	-0.32		-157.082	1119.95	-12.24	-1.02		-157.178	1131.49	-0.7	-0.0583333		-157.177	1130.75
C	10	cyclobutene	-26.0105	931.66	-57.96	-5.796		-26.1595	938.3	-51.32	-5.132		-155.946	992.65	3.03	0.303		-155.939	992.68	3.06	0.306		-155.886	1000	10.38	1.038		-155.907	997.83	8.21	0.821		-155.872	984.86	-4.76	-0.476		-155.862	978.45	-11.17	-1.117		-155.955	988.92	-0.7	-0.07		-155.954	988.29
C	9	cyclopropane	-20.4086	797.38	-45.77	-5.08556		-20.519	800.85	-42.3	-4.7		-117.867	845.62	2.47	0.274444		-117.862	845.69	2.54	0.282222		-117.82	851.62	8.47	0.941111		-117.836	850.25	7.1	0.788889		-117.81	839.18	-3.97	-0.441111		-117.799	832.51	-10.64	-1.18222		-117.874	842.55	-0.6	-0.0666667		-117.873	842.05
C	7	cyclopropene	-19.1491	629.11	-48.59	-6.94143		-19.2626	635.39	-42.31	-6.04429		-116.607	679.71	2.01	0.287143		-116.602	679.6	1.9	0.271429		-116.56	682.8	5.1	0.728571		-116.577	681.95	4.25	0.607143		-116.552	673.49	-4.21	-0.601429		-116.544	668.53	-9.17	-1.31		-116.615	677.26	-0.44	-0.0628571		-116.614	676.82
F	3	difluorinemonoxide	-64.0656	102.27	-12.79	-4.26333		-64.4867	89.36	-25.7	-8.56667		-274.761	120.28	5.22	1.74		-274.753	119.26	4.2	1.4		-274.644	122.77	7.71	2.57		-274.67	121.48	6.42	2.14		-274.618	114.58	-0.48	-0.16		-274.616	113.28	-1.78	-0.593333		-274.796	114.51	-0.55	-0.183333		-274.796	114.22
F	5	difluoromethane	-55.1443	416.51	-22.16	-4.432		-55.4809	397.98	-40.69	-8.138		-239.038	442.63	3.96	0.792		-239.031	442.18	3.51	0.702		-238.932	444.62	5.95	1.19		-238.955	443.24	4.57	0.914		-238.913	435.91	-2.76	-0.552		-238.909	433.61	-5.06	-1.012		-239.069	438.28	-0.39	-0.078		-239.068	437.93
C	10	dimethylamine	-25.2871	826.7	-39.87	-3.987		-25.4142	820.21	-46.36	-4.636		-135.141	867.95	1.38	0.138		-135.135	868.07	1.5	0.15		-135.087	873.72	7.15	0.715		-135.104	872.54	5.97	0.597		-135.074	861.01	-5.56	-0.556		-135.063	853.9	-12.67	-1.267		-135.151	865.51	-1.06	-0.106		-135.15	864.87
C	9	dimethylether	-30.7601	758.58	-34.94	-3.88222		-30.9206	745.05	-48.47	-5.38556		-155.02	796.47	2.95	0.327778		-155.015	796.36	2.84	0.315556		-154.957	802.34	8.82	0.98		-154.975	800.38	6.86	0.762222		-154.942	788.97	-4.55	-0.505556		-154.932	783.24	-10.28	-1.14222		-155.034	792.72	-0.8	-0.0888889		-155.033	792.15
C	8	ethane	-14.8241	674.1	-30.94	-3.8675		-14.9041	679.44	-25.6	-3.2		-79.8014	707.15	2.11	0.26375		-79.7982	707.33	2.29	0.28625		-79.7694	713.34	8.3	1.0375		-79.7806	712.7	7.66	0.9575		-79.7621	702.56	-2.48	-0.31		-79.7528	696.73	-8.31	-1.03875		-79.806	704.62	-0.42	-0.0525		-79.8052	704.17
C	6	ethanedial	-44.3237	598.51	-43.12	-7.18667		-44.5715	572.28	-69.35	-11.5583		-227.866	645.81	4.18	0.696667		-227.858	645.24	3.61	0.601667		-227.771	645.88	4.25	0.708333		-227.8	644.78	3.15	0.525		-227.755	637.99	-3.64	-0.606667		-227.75	635.08	-6.55	-1.09167		-227.887	640.84	-0.79	-0.131667		-227.887	640.45
C	9	ethanol	-30.7723	766.26	-37.53	-4.17		-30.9393	756.83	-46.96	-5.21778		-155.034	805.23	1.44	0.16		-155.029	805.15	1.36	0.151111		-154.968	809.26	5.47	0.607778		-154.988	808.43	4.64	0.515556		-154.956	798.03	-5.76	-0.64		-154.945	791.28	-12.51	-1.39		-155.05	802.83	-0.96	-0.106667		-155.049	802.31
C	10	ethylamine	-25.2959	832.24	-41.53	-4.153		-25.4263	827.84	-45.93	-4.593		-135.151	874.73	0.96	0.096		-135.146	874.89	1.12	0.112		-135.096	879.55	5.78	0.578		-135.115	878.89	5.12	0.512		-135.085	867.92	-5.85	-0.585		-135.073	860.24	-13.53	-1.353		-135.163	872.73	-1.04	-0.104		-135.162	872.11
C	6	ethylene	-13.5993	527.55	-33.79	-5.63167		-13.6839	536.77	-24.57	-4.095		-78.5754	562.28	0.94	0.156667		-78.5721	562.39	1.05	0.175		-78.541	564.26	2.92	0.486667		-78.5535	564.54	3.2	0.533333		-78.5378	558.06	-3.28	-0.546667		-78.5309	553.75	-7.59	-1.265		-78.5814	560.97	-0.37	-0.0616667		-78.5809	560.68
C	7	ethyleneoxide	-29.5377	613.57	-35.58	-5.08286		-29.6891	595.3	-53.85	-7.69286		-153.793	651.15	2	0.285714		-153.788	650.99	1.84	0.262857		-153.731	654.83	5.68	0.811429		-153.749	653.05	3.9	0.557143		-153.716	643.92	-5.23	-0.747143		-153.709	639.43	-9.72	-1.38857		-153.808	648.24	-0.91	-0.13		-153.807	647.82
F	2	f2	-48.1683	42.03	-7.1	-3.55		-48.4964	40.15	-8.98	-4.49		-199.577	52.81	3.68	1.84		-199.572	52.33	3.2	1.6		-199.491	55.36	6.23	3.115		-199.508	54.55	5.42	2.71		-199.473	49.85	0.72	0.36		-199.472	49.29	0.16	0.08		-199.604	48.91	-0.22	-0.11		-199.604	48.75
F	6	fluoro-ethene	-37.1694	537.07	-37.32	-6.22		-37.4042	537.06	-37.33	-6.22167		-177.849	577.56	3.17	0.528333		-177.843	577.4	3.01	0.501667		-177.771	579.48	5.09	0.848333		-177.792	578.8	4.41	0.735		-177.758	570.99	-3.4	-0.566667		-177.752	567.35	-7.04	-1.17333		-177.867	573.95	-0.44	-0.0733333		-177.867	573.6
C	4	formaldehyde	-22.748	356.05	-22.26	-5.565		-22.872	342.53	-35.78	-8.945		-114.521	379.77	1.46	0.365		-114.517	379.57	1.26	0.315		-114.472	379.91	1.6	0.4		-114.487	379.9	1.59	0.3975		-114.464	375.35	-2.96	-0.74		-114.46	373	-5.31	-1.3275		-114.533	377.81	-0.5	-0.125		-114.533	377.59
C	5	formicacid	-38.741	476.28	-30.83	-6.166		-38.9537	449.07	-58.04	-11.608		-189.805	510.1	2.99	0.598		-189.799	509.74	2.63	0.526		-189.723	508.71	1.6	0.32		-189.747	508.34	1.23	0.246		-189.71	503.58	-3.53	-0.706		-189.705	500.36	-6.75	-1.35		-189.825	506.45	-0.66	-0.132		-189.825	506.16
C	9	furan	-40.8096	924.79	-66.28	-7.36444		-41.0486	919.44	-71.63	-7.95889		-230.031	995.54	4.47	0.496667		-230.022	995.34	4.27	0.474444		-229.94	999.62	8.55	0.95		-229.969	996.39	5.32	0.591111		-229.92	984.88	-6.19	-0.687778		-229.912	980.11	-10.96	-1.21778		-230.049	990.27	-0.8	-0.0888889		-230.048	989.63
H	2	h2	-1.1632	107.85	-1.65	-0.825		-1.16237	106.4	-3.1	-1.55		-1.16974	109.58	0.08	0.04		-1.1696	109.5	0	0		-1.16791	111.08	1.58	0.79		-1.16807	111.15	1.65	0.825		-1.16782	109.05	-0.45	-0.225		-1.16503	107.29	-2.21	-1.105		-1.17006	109.42	-0.08	-0.04		-1.16967	109.18
C	5	h2coh_rad	-23.3011	392.08	-20.81	-4.162		-23.4275	379.63	-33.26	-6.652		-115.072	412.81	-0.08	-0.016		-115.068	412.73	-0.16	-0.032		-115.019	412.62	-0.27	-0.054		-115.034	412.32	-0.57	-0.114		-115.013	407.98	-4.91	-0.982		-115.007	404.15	-8.74	-1.748		-115.085	412.01	-0.88	-0.176		-115.085	411.71
C	3	hco_rad	-22.1102	266.87	-20.69	-6.89667		-22.2303	251.32	-36.24	-12.08		-113.879	289.12	1.56	0.52		-113.875	288.92	1.36	0.453333		-113.829	287.37	-0.19	-0.0633333		-113.845	287.78	0.22	0.0733333		-113.823	284.81	-2.75	-0.916667		-113.82	283.18	-4.38	-1.46		-113.89	286.93	-0.63	-0.21		-113.89	286.74
N	6	hydrazine	-22.1066	424.06	-24.29	-4.04833		-22.2103	405.4	-42.95	-7.15833		-111.871	445.38	-2.97	-0.495		-111.867	445.42	-2.93	-0.488333		-111.82	442.73	-5.62	-0.936667		-111.836	443.79	-4.56	-0.76		-111.815	439.94	-8.41	-1.40167		-111.805	433.71	-14.64	-2.44		-111.886	446.96	-1.39	-0.231667		-111.885	446.55
C	3	hydrogencyanide	-16.0735	292.28	-28.44	-9.48		-16.1673	288.74	-31.98	-10.66		-93.4402	321.73	1.01	0.336667		-93.4361	321.48	0.76	0.253333		-93.3982	317.75	-2.97	-0.99		-93.4147	319.79	-0.93	-0.31		-93.3963	317.75	-2.97	-0.99		-93.3919	315	-5.72	-1.90667		-93.4476	320.42	-0.3	-0.1		-93.4471	320.16
F	2	hydrogenfluoride	-24.7596	133.82	-7.5	-3.75		-24.911	124.5	-16.82	-8.41		-100.464	138.21	-3.11	-1.555		-100.462	138.03	-3.29	-1.645		-100.41	133.67	-7.65	-3.825		-100.421	134.65	-6.67	-3.335		-100.411	135.89	-5.43	-2.715		-100.407	133.77	-7.55	-3.775		-100.485	140.53	-0.79	-0.395		-100.485	140.46
O	4	hydrogenperoxide	-33.011	261.64	-15.05	-3.7625		-33.2027	242.29	-34.4	-8.6		-151.588	276.38	-0.31	-0.0775		-151.584	275.98	-0.71	-0.1775		-151.519	273.91	-2.78	-0.695		-151.538	274.57	-2.12	-0.53		-151.51	271.61	-5.08	-1.27		-151.504	267.51	-9.18	-2.295		-151.61	275.83	-0.86	-0.215		-151.609	275.6
C	14	isobutane	-28.4606	1224.96	-58.29	-4.16357		-28.6158	1233.64	-49.61	-3.54357		-158.406	1287.48	4.23	0.302143		-158.399	1287.71	4.46	0.318571		-158.345	1299.61	16.36	1.16857		-158.366	1297.45	14.2	1.01429		-158.33	1279.26	-3.99	-0.285		-158.314	1269.59	-13.66	-0.975714		-158.414	1282.49	-0.76	-0.0542857		-158.413	1281.64
C	12	isopropanol	-37.5945	1044.17	-51.35	-4.27917		-37.801	1037.57	-57.95	-4.82917		-194.341	1098.68	3.16	0.263333		-194.334	1098.62	3.1	0.258333		-194.261	1105.87	10.35	0.8625		-194.286	1104.21	8.69	0.724167		-194.245	1089.85	-5.67	-0.4725		-194.231	1081.15	-14.37	-1.1975		-194.358	1094.66	-0.86	-0.0716667		-194.357	1093.93
C	10	isopropyl_rad	-20.9894	850.86	-42.47	-4.247		-21.1071	858.34	-34.99	-3.499		-118.444	895.61	2.28	0.228		-118.439	895.82	2.49	0.249		-118.397	903.16	9.83	0.983		-118.413	901.74	8.41	0.841		-118.387	889.41	-3.92	-0.392		-118.376	882.68	-10.65	-1.065		-118.452	892.71	-0.62	-0.062		-118.451	892.14
C	5	ketene	-28.3611	497.3	-43.57	-8.714		-28.5288	490.17	-50.7	-10.14		-152.628	544.02	3.15	0.63		-152.622	543.64	2.77	0.554		-152.56	541.8	0.93	0.186		-152.582	542.6	1.73	0.346		-152.552	537.19	-3.68	-0.736		-152.546	533.5	-7.37	-1.474		-152.64	540.49	-0.38	-0.076		-152.64	540.19
Li	2	li2	-0.418641	16.08	-4.45	-2.225		-0.418333	16.42	-4.11	-2.055		-14.9968	20.52	-0.01	-0.005		-14.9941	20.95	0.42	0.21		-14.9922	20.21	-0.32	-0.16		-14.9952	20.45	-0.08	-0.04		-14.9908	20.51	-0.02	-0.01		-14.9906	20.39	-0.14	-0.07		-14.9974	20.54	0.01	0.005		-14.9972	20.42
Li	4	li2c2	-11.6432	297.61	-31.47	-7.8675		-11.7139	300.46	-28.62	-7.155		-91.1797	330.34	1.26	0.315		-91.1729	330.36	1.28	0.32		-91.1352	323.31	-5.77	-1.4425		-91.1575	328.07	-1.01	-0.2525		-91.1356	324.5	-4.58	-1.145		-91.1322	322.39	-6.69	-1.6725		-91.1836	328.11	-0.97	-0.2425		-91.1821	327.17
Li	4	li2nh	-10.9285	198.11	-14.59	-3.6475		-10.9826	191.19	-21.51	-5.3775		-70.3879	213.93	1.23	0.3075		-70.3825	213.86	1.16	0.29		-70.352	207.18	-5.52	-1.38		-70.3692	211.73	-0.97	-0.2425		-70.3458	205.77	-6.93	-1.7325		-70.3418	203.31	-9.39	-2.3475		-70.3868	209.08	-3.62	-0.905		-70.3852	208.12
Li	3	li2o	-16.459	166.05	-13.22	-4.40667		-16.5586	159.72	-19.55	-6.51667		-90.3322	182.98	3.71	1.23667		-90.3256	182.22	2.95	0.983333		-90.2859	175.92	-3.35	-1.11667		-90.3059	181.03	1.76	0.586667		-90.2799	175.73	-3.54	-1.18		-90.2785	174.97	-4.3	-1.43333		-90.3331	176.44	-2.83	-0.943333		-90.3317	175.59
Li	4	li2o2	-32.3985	252.76	-17.03	-4.2575		-32.5932	236.74	-33.05	-8.2625		-165.557	275.95	6.16	1.54		-165.548	274.84	5.05	1.2625		-165.476	266.48	-3.31	-0.8275		-165.505	271.78	1.99	0.4975		-165.467	266.72	-3.07	-0.7675		-165.464	265.56	-4.23	-1.0575		-165.567	268.46	-1.33	-0.3325		-165.565	267.25
Li	5	lich3	-7.61049	338.25	-15.87	-3.174		-7.64531	337.95	-16.17	-3.234		-47.3848	354.88	0.76	0.152		-47.3816	355.01	0.89	0.178		-47.3625	355.26	1.14	0.228		-47.3715	356.29	2.17	0.434		-47.3612	351.95	-2.17	-0.434		-47.3552	348.24	-5.88	-1.176		-47.3878	353.83	-0.29	-0.058		-47.3868	353.22
Li	4	linh2	-11.308	248.54	-14.45	-3.6125		-11.3615	240.53	-22.46	-5.615		-63.48	262	-0.99	-0.2475		-63.4764	262	-0.99	-0.2475		-63.4459	256.41	-6.58	-1.645		-63.4595	259.54	-3.45	-0.8625		-63.4426	255.22	-7.77	-1.9425		-63.4371	251.86	-11.13	-2.7825		-63.4846	260.74	-2.25	-0.5625		-63.4836	260.16
Li	3	lioh	-16.8167	202.82	-12	-4		-16.9098	191.68	-23.14	-7.71333		-83.3999	215.73	0.91	0.303333		-83.3953	215.22	0.4	0.133333		-83.3507	206.87	-7.95	-2.65		-83.3674	210.74	-4.08	-1.36		-83.3495	208.14	-6.68	-2.22667		-83.3464	206.29	-8.53	-2.84333		-83.4069	213.02	-1.8	-0.6		-83.4062	212.66
Li	2	lithiumfluoride	-24.4485	126.36	-14.04	-7.02		-24.605	120.93	-19.47	-9.735		-107.458	143.96	3.56	1.78		-107.452	142.88	2.48	1.24		-107.4	137.08	-3.32	-1.66		-107.416	140.42	0.02	0.01		-107.393	136.28	-4.12	-2.06		-107.393	135.9	-4.5	-2.25		-107.467	139.09	-1.31	-0.655		-107.466	138.59
Li	2	lithiumhydride	-0.782437	56.64	-1.47	-0.735		-0.781454	55.83	-2.28	-1.14		-8.07227	58.13	0.02	0.01		-8.07042	58.04	-0.07	-0.035		-8.06645	57.1	-1.01	-0.505		-8.06946	58.16	0.05	0.025		-8.06793	57.64	-0.47	-0.235		-8.06738	57.31	-0.8	-0.4		-8.07266	58.02	-0.09	-0.045		-8.07225	57.77
C	5	methane	-8.00968	401.03	-16.17	-3.234		-8.0501	403.5	-13.7	-2.74		-40.5014	418.31	1.11	0.222		-40.4999	418.43	1.23	0.246		-40.4836	421.58	4.38	0.876		-40.4897	421.56	4.36	0.872		-40.4805	415.57	-1.63	-0.326		-40.4742	411.6	-5.6	-1.12		-40.5039	416.97	-0.23	-0.046		-40.5034	416.7
C	12	methoxy-ethane	-37.582	1036.33	-49.31	-4.10917		-37.7822	1025.8	-59.84	-4.98667		-194.328	1090.06	4.42	0.368333		-194.32	1089.98	4.34	0.361667		-194.25	1098.66	13.02	1.085		-194.273	1096.1	10.46	0.871667		-194.231	1080.66	-4.98	-0.415		-194.218	1072.85	-12.79	-1.06583		-194.343	1084.81	-0.83	-0.0691667		-194.341	1084.06
C	4	methyl_rad	-7.34479	294.84	-12.46	-3.115		-7.38285	296.3	-11	-2.75		-39.827	307.32	0.02	0.005		-39.8254	307.41	0.11	0.0275		-39.8086	308.94	1.64	0.41		-39.8148	308.95	1.65	0.4125		-39.8076	305.21	-2.09	-0.5225		-39.8024	301.96	-5.34	-1.335		-39.8309	307.05	-0.25	-0.0625		-39.8305	306.85
C	6	methylalcohol	-23.9506	488.62	-22.93	-3.82167		-24.0772	475.79	-35.76	-5.96		-115.726	511.44	-0.11	-0.0183333		-115.722	511.33	-0.22	-0.0366667		-115.675	512.86	1.31	0.218333		-115.689	512.57	1.02	0.17		-115.666	506.05	-5.5	-0.916667		-115.659	501.43	-10.12	-1.68667		-115.74	510.57	-0.98	-0.163333		-115.74	510.22
C	7	methylamine	-18.476	555.73	-27.17	-3.88143		-18.5662	548.09	-34.81	-4.97286		-95.8454	582.19	-0.71	-0.101429		-95.842	582.3	-0.6	-0.0857143		-95.8045	584.13	1.23	0.175714		-95.818	584.2	1.3	0.185714		-95.7978	577.12	-5.78	-0.825714		-95.7885	571.35	-11.55	-1.65		-95.8556	581.87	-1.03	-0.147143		-95.8548	581.44
C	3	methylene_singlet	-6.65382	172.27	-7.93	-2.64333		-6.68247	168.3	-11.9	-3.96667		-39.1256	179.41	-0.79	-0.263333		-39.124	179.51	-0.69	-0.23		-39.1053	178.48	-1.72	-0.573333		-39.112	178.87	-1.33	-0.443333		-39.1058	176.7	-3.5	-1.16667		-39.1031	174.99	-5.21	-1.73667		-39.1296	179.43	-0.77	-0.256667		-39.1293	179.23
C	3	methylene_triplet	-6.66969	182.23	-8.03	-2.67667		-6.70684	183.59	-6.67	-2.22333		-39.1424	189.96	-0.3	-0.1		-39.1409	190.08	-0.18	-0.06		-39.1251	190.87	0.61	0.203333		-39.1307	190.64	0.38	0.126667		-39.1247	188.55	-1.71	-0.57		-39.1214	186.46	-3.8	-1.26667		-39.1466	190.05	-0.21	-0.07		-39.1463	189.9
C	10	methylenecyclopropane	-25.9989	924.36	-61	-6.1		-26.1506	932.69	-52.67	-5.267		-155.939	988.28	2.92	0.292		-155.932	988.27	2.91	0.291		-155.877	993.99	8.63	0.863		-155.898	992.13	6.77	0.677		-155.864	979.9	-5.46	-0.546		-155.854	973.09	-12.27	-1.227		-155.948	984.72	-0.64	-0.064		-155.947	984.14
C	8	methylformate	-45.5499	745.86	-42.67	-5.33375		-45.7953	717.23	-71.3	-8.9125		-229.097	793.44	4.91	0.61375		-229.089	793.05	4.52	0.565		-229.002	796.12	7.59	0.94875		-229.029	794.39	5.86	0.7325		-228.982	784.57	-3.96	-0.495		-228.975	780.05	-8.48	-1.06		-229.117	787.73	-0.8	-0.1		-229.116	787.2
C	7	methylnitrite	-49.1222	577.6	-39.45	-5.63571		-49.3855	540.76	-76.29	-10.8986		-245.067	622.03	4.98	0.711429		-245.058	621.52	4.47	0.638571		-244.967	623.21	6.16	0.88		-244.996	621.43	4.38	0.625714		-244.944	612.69	-4.36	-0.622857		-244.937	608.68	-8.37	-1.19571		-245.089	615.88	-1.17	-0.167143		-245.088	615.36
N	2	n2	-19.7832	210.23	-30.49	-15.245		-19.8895	195.04	-45.68	-22.84		-109.554	240.7	-0.02	-0.01		-109.55	240.61	-0.11	-0.055		-109.506	234.42	-6.3	-3.15		-109.524	236.37	-4.35	-2.175		-109.499	234.15	-6.57	-3.285		-109.497	233.04	-7.68	-3.84		-109.563	239.22	-1.5	-0.75		-109.563	239.11
N	2	nh_rad	-10.3575	86.45	-3.22	-1.61		-10.4157	81.56	-8.11	-4.055		-55.2236	88.32	-1.35	-0.675		-55.2217	88.34	-1.33	-0.665		-55.2015	87.66	-2.01	-1.005		-55.2094	88.05	-1.62	-0.81		-55.1978	86.61	-3.06	-1.53		-55.1958	85.38	-4.29	-2.145		-55.2308	89.06	-0.61	-0.305		-55.2307	88.99
N	3	nh2_rad	-11.0046	181.49	-8.4	-2.8		-11.0579	173.06	-16.83	-5.61		-55.8794	187.6	-2.29	-0.763333		-55.8775	187.63	-2.26	-0.753333		-55.8537	186	-3.89	-1.29667		-55.8621	186.69	-3.2	-1.06667		-55.8508	184.49	-5.4	-1.8		-55.8467	181.96	-7.93	-2.64333		-55.8877	188.81	-1.08	-0.36		-55.8874	188.67
O	2	nitricoxide	-25.76	147.2	-19.72	-9.86		-25.9027	126.42	-40.5	-20.25		-129.93	168.16	1.24	0.62		-129.926	167.96	1.04	0.52		-129.875	165.24	-1.68	-0.84		-129.892	165.13	-1.79	-0.895		-129.864	162.86	-4.06	-2.03		-129.863	162.31	-4.61	-2.305		-129.942	165.74	-1.18	-0.59		-129.942	165.6
F	4	nitrogentrifluoride	-82.2083	208.47	-22.16	-5.54		-82.7283	182.25	-48.38	-12.095		-354.202	236.53	5.9	1.475		-354.191	235.22	4.59	1.1475		-354.053	239.93	9.3	2.325		-354.086	238.46	7.83	1.9575		-354.017	228.1	-2.53	-0.6325		-354.014	226.38	-4.25	-1.0625		-354.247	229.97	-0.66	-0.165		-354.246	229.55
C	7	nitro-methane	-49.123	578.1	-41.15	-5.87857		-49.3871	541.73	-77.52	-11.0743		-245.067	622.46	3.21	0.458571		-245.059	621.98	2.73	0.39		-244.966	622.77	3.52	0.502857		-244.995	620.72	1.47	0.21		-244.945	613.44	-5.81	-0.83		-244.938	609.48	-9.77	-1.39571		-245.092	617.97	-1.28	-0.182857		-245.091	617.48
O	3	nitrousoxide	-35.6634	259.71	-37.82	-12.6067		-35.8571	230.03	-67.5	-22.5		-184.726	300.59	3.06	1.02		-184.719	300.02	2.49	0.83		-184.648	294.43	-3.1	-1.03333		-184.671	294.41	-3.12	-1.04		-184.633	292	-5.53	-1.84333		-184.631	290.89	-6.64	-2.21333		-184.742	296.41	-1.12	-0.373333		-184.741	296.18
O	3	no2	-41.6882	226.79	-28.61	-9.53667		-41.9182	191.46	-63.94	-21.3133		-205.15	258.12	2.72	0.906667		-205.143	257.61	2.21	0.736667		-205.064	255.09	-0.31	-0.103333		-205.088	253.72	-1.68	-0.56		-205.045	250.15	-5.25	-1.75		-205.043	249.26	-6.14	-2.04667		-205.17	253.79	-1.61	-0.536667		-205.169	253.54
O	2	o2	-31.7987	122.98	-13.13	-6.565		-31.9885	103.36	-32.75	-16.375		-150.375	139.08	2.97	1.485		-150.37	138.54	2.43	1.215		-150.312	138.33	2.22	1.11		-150.328	137.05	0.94	0.47		-150.296	133.24	-2.87	-1.435		-150.294	132.49	-3.62	-1.81		-150.39	134.98	-1.13	-0.565		-150.389	134.74
O	2	oh_rad	-16.4649	105.33	-4.6	-2.3		-16.5637	97.51	-12.42	-6.21		-75.7457	107.74	-2.19	-1.095		-75.7435	107.64	-2.29	-1.145		-75.7102	106.2	-3.73	-1.865		-75.7205	106.86	-3.07	-1.535		-75.7077	106.03	-3.9	-1.95		-75.7051	104.44	-5.49	-2.745		-75.7592	109.29	-0.64	-0.32		-75.7591	109.24
O	3	ozone	-47.6429	149.88	-21.12	-7.04		-47.9174	114.06	-56.94	-18.98		-225.508	174.74	3.74	1.24667		-225.5	173.76	2.76	0.92		-225.413	173.35	2.35	0.783333		-225.438	171.64	0.64	0.213333		-225.39	166.36	-4.64	-1.54667		-225.387	164.67	-6.33	-2.11		-225.532	169.42	-1.58	-0.526667		-225.531	169.05
C	11	propane	-21.6417	949.13	-44.81	-4.07364		-21.7597	956.41	-37.53	-3.41182		-119.103	997.14	3.2	0.290909		-119.098	997.36	3.42	0.310909		-119.057	1006.26	12.32	1.12		-119.073	1004.91	10.97	0.997273		-119.046	990.7	-3.24	-0.294545		-119.033	982.95	-10.99	-0.999091		-119.11	993.39	-0.55	-0.05		-119.109	992.75
C	9	propene	-20.425	807.67	-46.31	-5.14556		-20.5456	817.5	-36.48	-4.05333		-117.883	856.05	2.07	0.23		-117.878	856.22	2.24	0.248889		-117.835	861.21	7.23	0.803333		-117.852	860.59	6.61	0.734444		-117.827	849.75	-4.23	-0.47		-117.817	843.69	-10.29	-1.14333		-117.891	853.43	-0.55	-0.0611111		-117.89	852.94
C	7	propyne	-19.1803	648.71	-53.5	-7.64286		-19.3106	665.53	-36.68	-5.24		-116.646	704.08	1.87	0.267143		-116.641	703.98	1.77	0.252857		-116.594	704.28	2.07	0.295714		-116.614	705.33	3.12	0.445714		-116.591	697.71	-4.5	-0.642857		-116.581	691.89	-10.32	-1.47429		-116.654	701.83	-0.38	-0.0542857		-116.653	701.35
C	11	pyridine	-40.9853	1156.56	-81.59	-7.41727		-41.2262	1159.39	-78.76	-7.16		-248.275	1241.64	3.49	0.317273		-248.264	1241.65	3.5	0.318182		-248.181	1247.14	8.99	0.817273		-248.213	1243.74	5.59	0.508182		-248.158	1229.63	-8.52	-0.774545		-248.149	1224	-14.15	-1.28636		-248.292	1236.95	-1.2	-0.109091		-248.29	1236.18
C	10	pyrrole	-35.3478	999.94	-70.39	-7.039		-35.5581	1004.61	-65.72	-6.572		-210.161	1072.57	2.24	0.224		-210.152	1072.59	2.26	0.226		-210.077	1075.2	4.87	0.487		-210.104	1072.69	2.36	0.236		-210.062	1062.32	-8.01	-0.801		-210.052	1056.58	-13.75	-1.375		-210.176	1069.14	-1.19	-0.119		-210.175	1068.43
C	13	spiropentane	-32.8091	1194.75	-72.99	-5.61462		-32.9896	1199.22	-68.52	-5.27077		-195.231	1272.14	4.4	0.338462		-195.222	1272.13	4.39	0.337692		-195.156	1281.91	14.17	1.09		-195.181	1278.44	10.7	0.823077		-195.138	1261.99	-5.75	-0.442308		-195.124	1253.16	-14.58	-1.12154		-195.242	1266.89	-0.85	-0.0653846		-195.24	1266.08
C	13	t-butyl_rad	-27.8132	1129.8	-56.03	-4.31		-27.9687	1139.09	-46.74	-3.59538		-157.752	1189.5	3.67	0.282308		-157.745	1189.74	3.91	0.300769		-157.692	1200.19	14.36	1.10462		-157.712	1197.86	12.03	0.925385		-157.676	1181.29	-4.54	-0.349231		-157.663	1172.72	-13.11	-1.00846		-157.761	1185.14	-0.69	-0.0530769		-157.76	1184.36
F	6	tetrafluoroethylene	-107.854	549.26	-48.55	-8.09167		-108.534	518.61	-79.2	-13.2		-475.648	610.36	12.55	2.09167		-475.634	609.43	11.62	1.93667		-475.445	614.77	16.96	2.82667		-475.488	610.72	12.91	2.15167		-475.398	595.68	-2.13	-0.355		-475.394	593.74	-4.07	-0.678333		-475.701	597.22	-0.59	-0.0983333		-475.7	596.72
C	14	trans_butane	-28.4594	1224.25	-58.4	-4.17143		-28.6153	1233.32	-49.33	-3.52357		-158.405	1287.03	4.38	0.312857		-158.398	1287.3	4.65	0.332143		-158.345	1299.18	16.53	1.18071		-158.366	1297.06	14.41	1.02929		-158.329	1278.72	-3.93	-0.280714		-158.313	1269.1	-13.55	-0.967857		-158.414	1282.06	-0.59	-0.0421429		-158.412	1281.23
F	6	trifluoro-acetonitrile	-93.6015	595.86	-54.19	-9.03167		-94.1854	567.63	-82.42	-13.7367		-430.569	662.02	11.97	1.995		-430.555	660.92	10.87	1.81167		-430.389	664.43	14.38	2.39667		-430.433	662.18	12.13	2.02167		-430.348	648.6	-1.45	-0.241667		-430.343	645.92	-4.13	-0.688333		-430.612	649.75	-0.3	-0.05		-430.611	649.15
B	4	trifluoro-borane	-75.4533	444.91	-24.04	-6.01		-75.9115	413.85	-55.1	-13.775		-324.656	480.27	11.32	2.83		-324.647	479.64	10.69	2.6725		-324.509	480.04	11.09	2.7725		-324.541	479.84	10.89	2.7225		-324.481	469.36	0.41	0.1025		-324.475	465.7	-3.25	-0.8125		-324.69	469.07	0.12	0.03		-324.689	468.42
F	5	trifluoro-methane	-78.7264	433.5	-26.56	-5.312		-79.2131	405.78	-54.28	-10.856		-338.328	468.14	8.08	1.616		-338.318	467.48	7.42	1.484		-338.181	471.98	11.92	2.384		-338.212	469.35	9.29	1.858		-338.15	459.35	-0.71	-0.142		-338.148	457.75	-2.31	-0.462		-338.368	459.89	-0.17	-0.034		-338.368	459.48
C	13	trimethylamine	-32.1003	1099.01	-52.57	-4.04385		-32.2635	1093.21	-58.37	-4.49		-174.438	1154.9	3.32	0.255385		-174.431	1154.98	3.4	0.261538		-174.371	1164.31	12.73	0.979231		-174.392	1161.76	10.18	0.783077		-174.353	1146.07	-5.51	-0.423846		-174.339	1137.49	-14.09	-1.08385		-174.449	1150.55	-1.03	-0.0792308		-174.448	1149.69
B	13	Trimethylborane	-25.0233	1133.35	-53.7	-4.13077		-25.1598	1144.79	-42.26	-3.25077		-144.56	1190.67	3.62	0.278462		-144.554	1190.98	3.93	0.302308		-144.502	1200	12.95	0.996154		-144.523	1199.63	12.58	0.967692		-144.491	1182.85	-4.2	-0.323077		-144.476	1173.4	-13.65	-1.05		-144.568	1186.34	-0.71	-0.0546154		-144.567	1185.61
O	3	water	-17.1469	222.28	-10.82	-3.60667		-17.2387	209.59	-23.51	-7.83667		-76.4368	229.19	-3.91	-1.30333		-76.4346	229.05	-4.05	-1.35		-76.3969	226.17	-6.93	-2.31		-76.408	227.33	-5.77	-1.92333		-76.3961	226.09	-7.01	-2.33667		-76.3905	222.65	-10.45	-3.48333		-76.4525	231.95	-1.15	-0.383333		-76.4523	231.83
Cl	11	1-chloro-propane	-35.9302	923	-47.57	-4.32455		-36.2108	924.75	-45.82	-4.16545		-578.726	973.92	3.35	0.304545		-578.715	974.06	3.49	0.317273		-578.636	981.92	11.35	1.03182		-578.674	979.75	9.18	0.834545		-578.652	965.51	-5.06	-0.46		-578.64	958.03	-12.54	-1.14		-578.738	969.6	-0.97	-0.0881818		-578.737	968.98
Cl	7	acetylchloride	-43.8889	626.77	-41.05	-5.86429		-44.2145	610.31	-57.51	-8.21571		-613.485	671.33	3.51	0.501429		-613.474	670.98	3.16	0.451429		-613.378	672.92	5.1	0.728571		-613.42	671.44	3.62	0.517143		-613.394	663.39	-4.43	-0.632857		-613.388	659.31	-8.51	-1.21571		-613.504	666.91	-0.91	-0.13		-613.503	666.52
Al	2	al2	-3.89538	28.72	-1.29	-0.645		-3.90848	26.07	-3.94	-1.97		-484.803	30.25	0.24	0.12		-484.795	30.38	0.37	0.185		-484.75	29.78	-0.23	-0.115		-484.779	29.57	-0.44	-0.22		-484.791	28.88	-1.13	-0.565		-484.791	28.83	-1.18	-0.59		-484.81	29.41	-0.6	-0.3		-484.81	29.38
Al	8	al2h6	-7.52553	440.48	-8.26	-1.0325		-7.54107	436.57	-12.17	-1.52125		-488.455	448.56	-0.18	-0.0225		-488.446	448.22	-0.52	-0.065		-488.389	447.66	-1.08	-0.135		-488.423	450.55	1.81	0.22625		-488.436	444.74	-4	-0.5		-488.434	443.22	-5.52	-0.69		-488.465	448.26	-0.48	-0.06		-488.464	447.95
Al	5	al2o3	-51.9542	439.56	-28.11	-5.622		-52.2118	382.28	-85.39	-17.078		-710.732	468.78	1.11	0.222		-710.715	467.76	0.09	0.018		-710.556	449.62	-18.05	-3.61		-710.624	456.63	-11.04	-2.208		-710.594	453.86	-13.81	-2.762		-710.587	449.76	-17.91	-3.582		-710.768	466.2	-1.47	-0.294		-710.767	465.82
Al	12	Al3P3H6	-29.0994	712.05	-21.53	-1.79417		-29.2742	688.56	-45.02	-3.75167		-1755.1	735.67	2.09	0.174167		-1755.07	735.62	2.04	0.17		-1754.89	726.51	-7.07	-0.589167		-1755	728.24	-5.34	-0.445		-1755.04	721.58	-12	-1		-1755.03	719.33	-14.25	-1.1875		-1755.12	730.61	-2.97	-0.2475		-1755.12	730.37
Al	2	alcl	-16.9305	112.9	-4.04	-2.02		-17.0983	104.76	-12.18	-6.09		-702.721	116.94	0	0		-702.711	116.97	0.03	0.015		-702.648	115.05	-1.89	-0.945		-702.686	114.78	-2.16	-1.08		-702.699	114.68	-2.26	-1.13		-702.699	114.57	-2.37	-1.185		-702.73	115.89	-1.05	-0.525		-702.73	115.87
Al	2	alh	-2.53321	70.75	-1.34	-0.67		-2.54004	69.13	-2.96	-1.48		-242.99	72.01	-0.08	-0.04		-242.986	71.97	-0.12	-0.06		-242.961	71.59	-0.5	-0.25		-242.977	72.19	0.1	0.05		-242.984	71.51	-0.58	-0.29		-242.983	71.25	-0.84	-0.42		-242.994	71.82	-0.27	-0.135		-242.994	71.74
Al	6	alh2ph2	-10.8551	340.26	-7.51	-1.25167		-10.9105	329.65	-18.12	-3.02		-586.191	348.35	0.58	0.0966667		-586.184	348.21	0.44	0.0733333		-586.12	345.4	-2.37	-0.395		-586.156	346.77	-1	-0.166667		-586.169	342.38	-5.39	-0.898333		-586.167	341.19	-6.58	-1.09667		-586.2	346.47	-1.3	-0.216667		-586.2	346.31
Al	4	alh3	-3.73936	205.55	-2.86	-0.715		-3.74916	204.87	-3.54	-0.885		-244.202	208.41	0	0		-244.198	208.22	-0.19	-0.0475		-244.169	208.17	-0.24	-0.06		-244.187	209.9	1.49	0.3725		-244.193	206.8	-1.61	-0.4025		-244.192	205.93	-2.48	-0.62		-244.207	208.24	-0.17	-0.0425		-244.207	208.07
Al	10	al-ph2	-25.086	609.25	-16.38	-1.638		-25.2313	578.13	-47.5	-4.75		-1270.17	627.69	2.06	0.206		-1270.15	627.65	2.02	0.202		-1270.02	619.38	-6.25	-0.625		-1270.09	619.87	-5.76	-0.576		-1270.12	612.78	-12.85	-1.285		-1270.12	610.9	-14.73	-1.473		-1270.19	622.31	-3.32	-0.332		-1270.19	622.17
Al	2	als	-12.0982	89.65	-6.81	-3.405		-12.1999	82.1	-14.36	-7.18		-640.654	96.55	0.09	0.045		-640.646	96.57	0.11	0.055		-640.584	93.89	-2.57	-1.285		-640.62	94.04	-2.42	-1.21		-640.634	93.99	-2.47	-1.235		-640.633	93.91	-2.55	-1.275		-640.662	95.58	-0.88	-0.44		-640.662	95.56
Al	13	al-sih3	-18.8703	806.3	-15.85	-1.21923		-18.2151	959.81	137.66	10.5892		-1116.32	821.75	-0.4	-0.0307692		-1116.3	821.57	-0.58	-0.0446154		-1116.18	822.48	0.33	0.0253846		-1116.25	824.61	2.46	0.189231		-1116.27	814.37	-7.78	-0.598462		-1116.27	812.51	-9.64	-0.741538		-1116.33	820.38	-1.77	-0.136154		-1116.33	820.07
Al	4	aluminumtrichloride	-46.8403	274.9	-15.13	-3.7825		-47.3117	241.24	-48.79	-12.1975		-1623.31	289.68	-0.35	-0.0875		-1623.29	289.7	-0.33	-0.0825		-1623.14	283.94	-6.09	-1.5225		-1623.23	282.59	-7.44	-1.86		-1623.25	281.73	-8.3	-2.075		-1623.25	281.28	-8.75	-2.1875		-1623.33	287.44	-2.59	-0.6475		-1623.33	287.38
Al	4	aluminumtrifluoride	-74.7118	398.49	-23.81	-5.9525		-75.1467	354.35	-67.95	-16.9875		-542.298	426.88	4.58	1.145		-542.284	425.4	3.1	0.775		-542.121	418.11	-4.19	-1.0475		-542.17	421.17	-1.13	-0.2825		-542.119	411.09	-11.21	-2.8025		-542.116	409.36	-12.94	-3.235		-542.341	420.59	-1.71	-0.4275		-542.341	420.35
Cl	3	becl2	-30.9792	211.83	-9.74	-3.24667		-31.3118	203.87	-17.7	-5.9		-935.329	222.76	1.19	0.396667		-935.317	222.74	1.17	0.39		-935.236	221.59	0.02	0.00666667		-935.283	220.84	-0.73	-0.243333		-935.282	212.29	-9.28	-3.09333		-935.28	211.34	-10.23	-3.41		-935.34	219.87	-1.7	-0.566667		-935.339	219.48
S	2	bes	-11.1376	73.53	-8.89	-4.445		-11.243	73.04	-9.38	-4.69		-412.914	82.8	0.38	0.19		-412.909	82.83	0.41	0.205		-412.868	80.95	-1.47	-0.735		-412.893	82.17	-0.25	-0.125		-412.885	74.33	-8.09	-4.045		-412.884	73.97	-8.45	-4.225		-412.918	80.63	-1.79	-0.895		-412.918	80.46
S	5	besh	-22.5502	318.77	-25.16	-5.032		-22.7658	320.57	-23.36	-4.672		-812.449	344.65	0.72	0.144		-812.44	344.73	0.8	0.16		-812.358	341.88	-2.05	-0.41		-812.401	341.29	-2.64	-0.528		-812.401	332.19	-11.74	-2.348		-812.399	331	-12.93	-2.586		-812.458	341.52	-2.41	-0.482		-812.457	341.29
Si	3	besi2	-8.65674	125.73	-8.84	-2.94667		-8.02717	112.86	-21.71	-7.23667		-593.642	134.49	-0.08	-0.0266667		-593.634	134.78	0.21	0.07		-593.573	132.03	-2.54	-0.846667		-593.607	132.31	-2.26	-0.753333		-593.613	127.76	-6.81	-2.27		-593.612	127.3	-7.27	-2.42333		-593.648	133.07	-1.5	-0.5		-593.648	132.86
S	11	C2H6O2S	-56.7115	833.59	-127.69	-11.6082		-57.0248	780.69	-180.59	-16.4173		-628.475	957.47	-3.81	-0.346364		-628.464	957.18	-4.1	-0.372727		-628.309	942.7	-18.58	-1.68909		-628.359	941.24	-20.04	-1.82182		-628.305	921.1	-40.18	-3.65273		-628.293	913.87	-47.41	-4.31		-628.505	953.15	-8.13	-0.739091		-628.503	952.37
Si	9	C2H6Si	-18.642	727.24	-35.68	-3.96444		-18.5291	802.94	40.02	4.44667		-369.275	763.75	0.83	0.0922222		-369.268	763.65	0.73	0.0811111		-369.205	765.2	2.28	0.253333		-369.235	766.11	3.19	0.354444		-369.225	756.69	-6.23	-0.692222		-369.219	752.65	-10.27	-1.14111		-369.285	761.95	-0.97	-0.107778		-369.284	761.51
S	3	carbondisulfide	-25.84	245.42	-39.91	-13.3033		-26.0714	237.71	-47.62	-15.8733		-834.544	285.68	0.35	0.116667		-834.534	285.28	-0.05	-0.0166667		-834.446	282.09	-3.24	-1.08		-834.492	280.74	-4.59	-1.53		-834.495	277.5	-7.83	-2.61		-834.494	277.32	-8.01	-2.67		-834.557	283.95	-1.38	-0.46		-834.557	283.9
S	2	carbonmonosulfide	-15.6579	150.28	-22.29	-11.145		-15.7813	140.73	-31.84	-15.92		-436.24	171.62	-0.95	-0.475		-436.234	171.43	-1.14	-0.57		-436.183	169.14	-3.43	-1.715		-436.21	169.35	-3.22	-1.61		-436.208	167.35	-5.22	-2.61		-436.208	167.06	-5.51	-2.755		-436.249	171.24	-1.33	-0.665		-436.249	171.2
Cl	5	carbontetrachloride	-65.1157	266.36	-33.49	-6.698		-65.7997	242.55	-57.3	-11.46		-1878.95	299.83	-0.02	-0.004		-1878.93	299.66	-0.19	-0.038		-1878.76	297.43	-2.42	-0.484		-1878.85	293.48	-6.37	-1.274		-1878.87	289.36	-10.49	-2.098		-1878.86	288.02	-11.83	-2.366		-1878.98	297.04	-2.81	-0.562		-1878.98	296.84
S	3	carbonylsulfide	-31.7084	306.59	-37.14	-12.38		-31.9275	287.75	-55.98	-18.66		-511.595	346.01	2.28	0.76		-511.586	345.3	1.57	0.523333		-511.504	341.8	-1.93	-0.643333		-511.539	341.6	-2.13	-0.71		-511.523	338.45	-5.28	-1.76		-511.521	337.46	-6.27	-2.09		-511.61	342.78	-0.95	-0.316667		-511.61	342.65
Cl	5	CF3Cl	-93.0047	400.98	-31.26	-6.252		-93.651	365.88	-66.36	-13.272		-797.944	441.29	9.05	1.81		-797.929	440.55	8.31	1.662		-797.757	445.66	13.42	2.684		-797.809	441.93	9.69	1.938		-797.751	430.11	-2.13	-0.426		-797.748	428.55	-3.69	-0.738		-797.99	431.7	-0.54	-0.108		-797.989	431.29
Mg	6	ch3mgcl	-23.1945	426.6	-13.86	-2.31		-23.3974	421.96	-18.5	-3.08333		-700.285	441.68	1.22	0.203333		-700.272	441.92	1.46	0.243333		-700.197	441.52	1.06	0.176667		-700.241	441.64	1.18	0.196667		-700.235	431.22	-9.24	-1.54		-700.226	425.74	-14.72	-2.45333		-700.295	438.54	-1.92	-0.32		-700.293	437.66
P	7	CH3PH2	-15.0911	514.21	-20.73	-2.96143		-15.1706	502.71	-32.23	-4.60429		-382.455	536.37	1.43	0.204286		-382.451	536.38	1.44	0.205714		-382.398	536.18	1.24	0.177143		-382.424	536.65	1.71	0.244286		-382.421	529.35	-5.59	-0.798571		-382.415	525.44	-9.5	-1.35714		-382.463	533.78	-1.16	-0.165714		-382.462	533.48
S	5	ch3s_rad	-17.4764	358.3	-21.96	-4.392		-17.6138	356.18	-24.08	-4.816		-438.067	381.21	0.95	0.19		-438.061	381.23	0.97	0.194		-438.01	382.97	2.71	0.542		-438.036	382.34	2.08	0.416		-438.032	376.39	-3.87	-0.774		-438.027	373.08	-7.18	-1.436		-438.075	379.38	-0.88	-0.176		-438.074	379.16
Cl	2	chlorinemonofluoride	-38.9583	51.35	-16.34	-8.17		-39.2873	45.91	-21.78	-10.89		-560.008	65.74	-1.95	-0.975		-560	65.46	-2.23	-1.115		-559.918	64.68	-3.01	-1.505		-559.95	64.5	-3.19	-1.595		-559.94	62.34	-5.35	-2.675		-559.94	62.06	-5.63	-2.815		-560.033	66.03	-1.66	-0.83		-560.032	65.9
Cl	2	chlorinemonoxide	-30.7164	55.97	-19.34	-9.67		-30.9816	45.06	-30.25	-15.125		-535.348	72.16	-3.15	-1.575		-535.341	71.92	-3.39	-1.695		-535.269	69.06	-6.25	-3.125		-535.301	68.65	-6.66	-3.33		-535.292	66.68	-8.63	-4.315		-535.291	66.27	-9.04	-4.52		-535.367	72.59	-2.72	-1.36		-535.367	72.43
Cl	4	chlorinetrifluoride	-87.1433	103.86	-49.02	-12.255		-87.7843	86.48	-66.4	-16.6		-759.633	148.4	-4.48	-1.12		-759.62	147.73	-5.15	-1.2875		-759.443	141.57	-11.31	-2.8275		-759.495	141.88	-11	-2.75		-759.452	135.86	-17.02	-4.255		-759.45	134.95	-17.93	-4.4825		-759.689	147.54	-5.34	-1.335		-759.688	147.21
Cl	6	chloro-ethene	-27.8871	500.98	-38.43	-6.405		-28.1335	504.17	-35.24	-5.87333		-538.2	540.58	1.17	0.195		-538.191	540.62	1.21	0.201667		-538.123	541.55	2.14	0.356667		-538.157	540.77	1.36	0.226667		-538.147	534.13	-5.28	-0.88		-538.141	530.36	-9.05	-1.50833		-538.212	538.59	-0.82	-0.136667		-538.211	538.29
Cl	5	chloroform	-50.848	305.52	-28.43	-5.686		-51.3708	288.15	-45.8	-9.16		-1419.35	334.41	0.46	0.092		-1419.33	334.3	0.35	0.07		-1419.2	333.35	-0.6	-0.12		-1419.27	330.62	-3.33	-0.666		-1419.28	325.7	-8.25	-1.65		-1419.27	323.3	-10.65	-2.13		-1419.37	332.03	-1.92	-0.384		-1419.37	331.82
Cl	2	cl2	-29.7207	43.32	-15.27	-7.635		-30.057	38.39	-20.2	-10.1		-920.404	56.88	-1.71	-0.855		-920.393	56.75	-1.84	-0.92		-920.31	52.5	-6.09	-3.045		-920.356	52.24	-6.35	-3.175		-920.372	52.66	-5.93	-2.965		-920.371	52.12	-6.47	-3.235		-920.418	56.39	-2.2	-1.1		-920.418	56.36
Cl	5	Cl2SO2	-71.6293	216.16	-118.14	-23.628		-72.2174	164.54	-169.76	-33.952		-1469.11	328.34	-5.96	-1.192		-1469.09	327.95	-6.35	-1.27		-1468.88	300.13	-34.17	-6.834		-1468.96	299.68	-34.62	-6.924		-1468.95	292.49	-41.81	-8.362		-1468.95	290.99	-43.31	-8.662		-1469.15	323.9	-10.4	-2.08		-1469.15	323.61
Cl	2	ClN	-24.6489	62.12	-15.22	-7.61		-24.8702	52.07	-25.27	-12.635		-514.862	74.97	-2.37	-1.185		-514.854	74.76	-2.58	-1.29		-514.795	72.51	-4.83	-2.415		-514.825	71.9	-5.44	-2.72		-514.819	70.13	-7.21	-3.605		-514.818	69.68	-7.66	-3.83		-514.875	75.04	-2.3	-1.15		-514.874	74.87
S	9	dimethylsulfide	-24.923	716.98	-40.88	-4.54222		-25.0932	713.05	-44.81	-4.97889		-478.007	759.74	1.88	0.208889		-478	759.81	1.95	0.216667		-477.934	764.05	6.19	0.687778		-477.965	762.63	4.77	0.53		-477.951	751.36	-6.5	-0.722222		-477.94	744.76	-13.1	-1.45556		-478.017	756.53	-1.33	-0.147778		-478.016	756.03
S	10	dimethylsulfoxide	-40.8126	772.37	-77.18	-7.718		-41.0566	745.37	-104.18	-10.418		-553.223	846.92	-2.63	-0.263		-553.213	846.81	-2.74	-0.274		-553.104	842.42	-7.13	-0.713		-553.145	841.36	-8.19	-0.819		-553.114	827.28	-22.27	-2.227		-553.102	819.99	-29.56	-2.956		-553.245	845	-4.55	-0.455		-553.244	844.35
Si	8	disilane	-11.2534	510.16	-10.66	-1.3325		-10.7976	604.24	83.42	10.4275		-582.581	520.25	-0.57	-0.07125		-582.574	520.06	-0.76	-0.095		-582.509	520.55	-0.27	-0.03375		-582.544	522.33	1.51	0.18875		-582.557	515.58	-5.24	-0.655		-582.555	514.39	-6.43	-0.80375		-582.59	519.71	-1.11	-0.13875		-582.59	519.49
S	9	ethanethiol	-24.92	715.1	-42.89	-4.76556		-25.1023	718.75	-39.24	-4.36		-478.008	759.96	1.97	0.218889		-478.001	760.07	2.08	0.231111		-477.933	763.94	5.95	0.661111		-477.965	762.78	4.79	0.532222		-477.952	751.85	-6.14	-0.682222		-477.943	746.1	-11.89	-1.32111		-478.018	756.73	-1.26	-0.14		-478.017	756.27
Cl	8	ethylchloride	-29.1127	647.99	-33.73	-4.21625		-29.3556	648.02	-33.7	-4.2125		-539.424	683.99	2.27	0.28375		-539.415	684.08	2.36	0.295		-539.349	688.99	7.27	0.90875		-539.382	687.54	5.82	0.7275		-539.369	677.47	-4.25	-0.53125		-539.36	671.99	-9.73	-1.21625		-539.434	680.89	-0.83	-0.10375		-539.434	680.47
S	4	H2CS	-16.8858	298.73	-25.85	-6.4625		-17.0213	295.83	-28.75	-7.1875		-437.48	325.29	0.71	0.1775		-437.474	325.22	0.64	0.16		-437.422	325.12	0.54	0.135		-437.449	324.85	0.27	0.0675		-437.446	319.99	-4.59	-1.1475		-437.442	317.79	-6.79	-1.6975		-437.488	323.64	-0.94	-0.235		-437.488	323.51
Cl	2	hydrogenchloride	-15.4745	96	-8.65	-4.325		-15.6508	98.16	-6.49	-3.245		-460.821	104.72	0.07	0.035		-460.816	104.79	0.14	0.07		-460.773	102.88	-1.77	-0.885		-460.796	102.89	-1.76	-0.88		-460.803	101.47	-3.18	-1.59		-460.802	101.01	-3.64	-1.82		-460.828	103.94	-0.71	-0.355		-460.827	103.91
S	3	hydrogensulfide	-11.2838	164.42	-16.64	-5.54667		-11.3994	170.08	-10.98	-3.66		-399.406	180.95	-0.11	-0.0366667		-399.402	180.92	-0.14	-0.0466667		-399.359	178.86	-2.2	-0.733333		-399.381	179.01	-2.05	-0.683333		-399.387	176.53	-4.53	-1.51		-399.385	175.88	-5.18	-1.72667		-399.411	180.1	-0.96	-0.32		-399.411	180.06
Cl	3	hypochlorousacid	-31.3646	151.68	-17.64	-5.88		-31.6298	140.28	-29.04	-9.68		-535.998	167.76	-1.56	-0.52		-535.991	167.56	-1.76	-0.586667		-535.917	164.7	-4.62	-1.54		-535.949	164.81	-4.51	-1.50333		-535.942	162.69	-6.63	-2.21		-535.938	160.58	-8.74	-2.91333		-536.017	167.8	-1.52	-0.506667		-536.016	167.65
P	4	li2ph	-7.55527	163.88	-6.35	-1.5875		-7.60952	159.96	-10.27	-2.5675		-357.003	171.28	1.05	0.2625		-356.997	171.41	1.18	0.295		-356.955	164.82	-5.41	-1.3525		-356.979	166.86	-3.37	-0.8425		-356.979	163.75	-6.48	-1.62		-356.977	162.58	-7.65	-1.9125		-357.006	168.01	-2.22	-0.555		-357.004	167.29
S	4	li2s2	-20.7993	216.71	-13.79	-3.4475		-20.9887	204.23	-26.27	-6.5675		-811.577	231.45	0.95	0.2375		-811.566	231.45	0.95	0.2375		-811.481	222.09	-8.41	-2.1025		-811.527	223.26	-7.24	-1.81		-811.537	223.74	-6.76	-1.69		-811.535	222.57	-7.93	-1.9825		-811.586	228.66	-1.84	-0.46		-811.584	227.2
Si	4	li2si2	-8.10752	155.67	-7.42	-1.855		-7.46318	134.74	-28.35	-7.0875		-593.991	163.32	0.23	0.0575		-593.982	163.64	0.55	0.1375		-593.919	158.23	-4.86	-1.215		-593.955	159.13	-3.96	-0.99		-593.965	159.15	-3.94	-0.985		-593.964	158.42	-4.67	-1.1675		-593.998	162.34	-0.75	-0.1875		-593.997	161.74
Cl	2	licl	-15.1898	105.12	-3.78	-1.89		-15.3567	102.1	-6.8	-3.4		-467.814	109.64	0.74	0.37		-467.806	109.46	0.56	0.28		-467.761	105.47	-3.43	-1.715		-467.788	106.84	-2.06	-1.03		-467.793	106.63	-2.27	-1.135		-467.792	106.16	-2.74	-1.37		-467.819	108.16	-0.74	-0.37		-467.818	107.45
P	4	liph2	-7.90214	193.82	-6.96	-1.74		-7.95823	190.32	-10.46	-2.615		-350.066	201.48	0.7	0.175		-350.062	201.51	0.73	0.1825		-350.019	195.74	-5.04	-1.26		-350.043	197.84	-2.94	-0.735		-350.046	195.08	-5.7	-1.425		-350.045	193.97	-6.81	-1.7025		-350.071	199.5	-1.28	-0.32		-350.07	199.03
S	3	lish	-10.9571	147.11	-8.98	-2.99333		-11.0645	148.37	-7.72	-2.57333		-406.351	156.57	0.48	0.16		-406.346	156.49	0.4	0.133333		-406.299	151.04	-5.05	-1.68333		-406.325	152.85	-3.24	-1.08		-406.328	151.15	-4.94	-1.64667		-406.327	150.34	-5.75	-1.91667		-406.356	155.2	-0.89	-0.296667		-406.355	154.61
S	6	methanethiol	-18.1015	439.5	-29.09	-4.84833		-18.245	440.77	-27.82	-4.63667		-438.705	469.5	0.91	0.151667		-438.7	469.55	0.96	0.16		-438.645	470.64	2.05	0.341667		-438.671	470.07	1.48	0.246667		-438.668	463.13	-5.46	-0.91		-438.662	459.4	-9.19	-1.53167		-438.713	467.44	-1.15	-0.191667		-438.712	467.17
Cl	5	methylchloride	-22.2917	370.84	-19.48	-3.896		-22.4943	367.53	-22.79	-4.558		-500.118	391.5	1.18	0.236		-500.111	391.53	1.21	0.242		-500.057	393.56	3.24	0.648		-500.085	392.71	2.39	0.478		-500.081	386.54	-3.78	-0.756		-500.076	383.02	-7.3	-1.46		-500.126	389.56	-0.76	-0.152		-500.126	389.3
Cl	5	methylenechloride	-36.5723	339.74	-23.67	-4.734		-36.9351	329.41	-34	-6.8		-959.734	364.3	0.89	0.178		-959.721	364.25	0.84	0.168		-959.629	364.79	1.38	0.276		-959.679	363.07	-0.34	-0.068		-959.682	357.43	-5.98	-1.196		-959.677	354.34	-9.07	-1.814		-959.749	362.12	-1.29	-0.258		-959.749	361.89
Si	8	methylsilane	-13.0465	596.97	-20.32	-2.54		-12.8879	665.09	47.8	5.975		-331.198	617.82	0.53	0.06625		-331.193	617.72	0.43	0.05375		-331.144	619.79	2.5	0.3125		-331.168	621.01	3.72	0.465		-331.165	612.46	-4.83	-0.60375		-331.159	608.67	-8.62	-1.0775		-331.205	616.47	-0.82	-0.1025		-331.204	616.08
Mg	2	mg2	-1.62801	0.16	0.03	0.015		-1.63264	-0.04	-0.17	-0.085		-400.174	0.25	0.12	0.06		-400.162	0.32	0.19	0.095		-400.128	0.26	0.13	0.065		-400.156	0.12	-0.01	-0.005		-400.164	-0.21	-0.34	-0.17		-400.164	-0.22	-0.35	-0.175		-400.181	0	-0.13	-0.065		-400.181	-0.01
Mg	6	mg2h4	-3.98777	236.81	2.62	0.436667		-3.99345	235.4	1.21	0.201667		-402.537	234.27	0.08	0.0133333		-402.526	234.44	0.25	0.0416667		-402.482	234.32	0.13	0.0216667		-402.512	235.16	0.97	0.161667		-402.51	224.33	-9.86	-1.64333		-402.503	219.77	-14.42	-2.40333		-402.543	232.86	-1.33	-0.221667		-402.541	231.53
Mg	3	mgc2	-11.9185	206.29	-25.32	-8.44		-11.9769	199.3	-32.31	-10.77		-276.146	231.96	0.35	0.116667		-276.136	231.98	0.37	0.123333		-276.086	227.59	-4.02	-1.34		-276.115	228.87	-2.74	-0.913333		-276.094	220.68	-10.93	-3.64333		-276.088	216.86	-14.75	-4.91667		-276.153	229.71	-1.9	-0.633333		-276.151	229.06
Mg	9	mg-ch32	-15.6355	672.52	-26.82	-2.98		-15.7127	674.58	-24.76	-2.75111		-279.878	700.99	1.65	0.183333		-279.87	701.35	2.01	0.223333		-279.817	703.5	4.16	0.462222		-279.845	704.12	4.78	0.531111		-279.83	693.62	-5.72	-0.635556		-279.816	684.72	-14.62	-1.62444		-279.886	698.3	-1.04	-0.115556		-279.885	697.19
Mg	3	mgcl2	-30.7451	175.42	-1.2	-0.4		-31.069	161.17	-15.45	-5.15		-1120.68	176.8	0.18	0.06		-1120.67	176.91	0.29	0.0966667		-1120.57	173.2	-3.42	-1.14		-1120.63	173.11	-3.51	-1.17		-1120.63	163.07	-13.55	-4.51667		-1120.63	160.67	-15.95	-5.31667		-1120.7	173.47	-3.15	-1.05		-1120.69	172.79
Mg	3	mgf2	-49.2912	235.98	-9.79	-3.26333		-49.5859	211.55	-34.22	-11.4067		-399.98	251.15	5.38	1.79333		-399.969	250.42	4.65	1.55		-399.856	244.76	-1.01	-0.336667		-399.893	246.87	1.1	0.366667		-399.836	225.89	-19.88	-6.62667		-399.831	222.81	-22.96	-7.65333		-400.002	241.57	-4.2	-1.4		-399.999	239.88
Mg	2	mgh	-1.36417	34.28	1.78	0.89		-1.36772	34.49	1.99	0.995		-200.636	32.42	-0.08	-0.04		-200.63	32.45	-0.05	-0.025		-200.611	32.6	0.1	0.05		-200.626	32.8	0.3	0.15		-200.626	29.1	-3.4	-1.7		-200.624	28.25	-4.25	-2.125		-200.639	32.15	-0.35	-0.175		-200.639	31.93
Mg	3	mgh2	-1.97249	104.98	1.68	0.56		-1.97782	105.84	2.54	0.846667		-201.247	103.39	0.09	0.03		-201.241	103.39	0.09	0.03		-201.22	103.96	0.66	0.22		-201.236	104.66	1.36	0.453333		-201.237	100.47	-2.83	-0.943333		-201.233	98.54	-4.76	-1.58667		-201.25	102.94	-0.36	-0.12		-201.249	102.38
Mg	2	mgo	-16.7084	58.43	-8.46	-4.23		-16.8054	48.42	-18.47	-9.235		-275.27	67.18	0.29	0.145		-275.262	66.96	0.07	0.035		-275.208	62.05	-4.84	-2.42		-275.234	63.7	-3.19	-1.595		-275.205	50.88	-16.01	-8.005		-275.203	49.6	-17.29	-8.645		-275.28	64.46	-2.43	-1.215		-275.279	63.78
Mg	5	mgoh	-34.0179	382.74	-14.65	-2.93		-34.2033	357.91	-39.48	-7.896		-351.87	398.44	1.05	0.21		-351.859	398.13	0.74	0.148		-351.761	386.3	-11.09	-2.218		-351.798	388.68	-8.71	-1.742		-351.755	373.68	-23.71	-4.742		-351.745	367	-30.39	-6.078		-351.888	393.68	-3.71	-0.742		-351.885	392.05
Mg	2	mgs	-10.9212	48.23	-2.49	-1.245		-11.0189	42.01	-8.71	-4.355		-598.29	50.68	-0.04	-0.02		-598.28	50.73	0.01	0.005		-598.223	47.71	-3.01	-1.505		-598.259	48.26	-2.46	-1.23		-598.258	40.07	-10.65	-5.325		-598.256	38.93	-11.79	-5.895		-598.297	49.05	-1.67	-0.835		-598.297	48.83
Mg	5	mgsh	-22.3155	281.95	-15.71	-3.142		-22.5217	277	-20.66	-4.132		-997.801	298.12	0.46	0.092		-997.788	298.19	0.53	0.106		-997.689	293.55	-4.11	-0.822		-997.745	293.23	-4.43	-0.886		-997.75	282.7	-14.96	-2.992		-997.746	280.47	-17.19	-3.438		-997.812	294.21	-3.45	-0.69		-997.811	293.78
Na	2	na2	-0.383967	11.39	-6.16	-3.08		-0.347375	17.52	-0.03	-0.015		-324.603	17.82	0.27	0.135		-324.578	18.17	0.62	0.31		-324.56	17.56	0.01	0.005		-324.587	17.5	-0.05	-0.025		-324.594	17.5	-0.05	-0.025		-324.594	17.47	-0.08	-0.04		-324.609	17.49	-0.06	-0.03		-324.609	17.46
Na	4	na2c2	-11.56	262.44	-28.81	-7.2025		-11.6157	284.44	-6.81	-1.7025		-400.729	291.77	0.52	0.13		-400.701	292.27	1.02	0.255		-400.649	286.7	-4.55	-1.1375		-400.692	288.74	-2.51	-0.6275		-400.68	284.81	-6.44	-1.61		-400.677	282.97	-8.28	-2.07		-400.739	289.65	-1.6	-0.4		-400.738	289.11
Na	4	na2nh	-10.8303	153.59	-13.24	-3.31		-10.865	163.05	-3.78	-0.945		-379.924	167.36	0.53	0.1325		-379.898	167.65	0.82	0.205		-379.853	162.22	-4.61	-1.1525		-379.89	163.73	-3.1	-0.775		-379.877	157.51	-9.32	-2.33		-379.873	155.23	-11.6	-2.9		-379.932	164.55	-2.28	-0.57		-379.932	164.04
Na	3	na2o	-16.3414	109.32	-11.35	-3.78333		-16.4237	120.68	0.01	0.00333333		-399.848	123.62	2.95	0.983333		-399.821	123.57	2.9	0.966667		-399.765	117.23	-3.44	-1.14667		-399.804	119.3	-1.37	-0.456667		-399.787	112.28	-8.39	-2.79667		-399.785	111.54	-9.13	-3.04333		-399.857	118.12	-2.55	-0.85		-399.856	117.59
Na	4	na2o2	-32.2777	194.02	-12.45	-3.1125		-32.4611	199.46	-7.01	-1.7525		-475.064	210.95	4.48	1.12		-475.034	210.8	4.33	1.0825		-474.947	202.99	-3.48	-0.87		-474.996	204.92	-1.55	-0.3875		-474.966	198.64	-7.83	-1.9575		-474.964	197.45	-9.02	-2.255		-475.079	202.75	-3.72	-0.93		-475.078	202.1
Na	4	na2ph	-7.48593	137.44	-4.98	-1.245		-7.53144	156.59	14.17	3.5425		-666.569	143.24	0.82	0.205		-666.541	143.6	1.18	0.295		-666.486	139.35	-3.07	-0.7675		-666.533	140.19	-2.23	-0.5575		-666.54	134.73	-7.69	-1.9225		-666.539	133.74	-8.68	-2.17		-666.579	140.73	-1.69	-0.4225		-666.578	140.5
Na	4	na2s2	-20.7164	181.73	-6	-1.5		-20.909	199.83	12.1	3.025		-1121.12	188.52	0.79	0.1975		-1121.09	188.99	1.26	0.315		-1120.99	182.95	-4.78	-1.195		-1121.06	182.61	-5.12	-1.28		-1121.07	179.47	-8.26	-2.065		-1121.07	178.64	-9.09	-2.2725		-1121.13	184.99	-2.74	-0.685		-1121.13	184.68
Na	4	na2si2	-8.04908	136.07	-5.62	-1.405		-7.41236	148.48	6.79	1.6975		-903.567	141.64	-0.05	-0.0125		-903.536	142.16	0.47	0.1175		-903.461	139.43	-2.26	-0.565		-903.521	139.66	-2.03	-0.5075		-903.538	136.83	-4.86	-1.215		-903.537	136.2	-5.49	-1.3725		-903.581	140.89	-0.8	-0.2		-903.581	140.79
Na	5	nach3	-7.57548	324.82	-16.21	-3.242		-7.59407	328.61	-12.42	-2.484		-202.169	341.7	0.67	0.134		-202.155	341.87	0.84	0.168		-202.127	341.87	0.84	0.168		-202.149	343.23	2.2	0.44		-202.144	338.44	-2.59	-0.518		-202.138	334.89	-6.14	-1.228		-202.175	340.39	-0.64	-0.128		-202.174	340.06
Na	2	nacl	-15.1547	91.63	0.05	0.025		-15.3157	99.16	7.58	3.79		-622.591	91.96	0.38	0.19		-622.573	92.05	0.47	0.235		-622.522	89.54	-2.04	-1.02		-622.56	90.11	-1.47	-0.735		-622.567	87.9	-3.68	-1.84		-622.566	87.4	-4.18	-2.09		-622.599	90.36	-1.22	-0.61		-622.599	90.22
Na	4	nanh2	-11.2589	226.25	-12.34	-3.085		-11.3011	225.44	-13.15	-3.2875		-218.244	236.02	-2.57	-0.6425		-218.23	236.22	-2.37	-0.5925		-218.191	230.97	-7.62	-1.905		-218.215	232.82	-5.77	-1.4425		-218.204	228.36	-10.23	-2.5575		-218.198	224.91	-13.68	-3.42		-218.254	236.32	-2.27	-0.5675		-218.253	235.93
Na	3	naoh	-16.7629	177.56	-8.71	-2.90333		-16.8466	174.78	-11.49	-3.83		-238.155	184.56	-1.71	-0.57		-238.141	184.64	-1.63	-0.543333		-238.088	176.16	-10.11	-3.37		-238.113	177.91	-8.36	-2.78667		-238.1	174.59	-11.68	-3.89333		-238.096	172.26	-14.01	-4.67		-238.169	183.75	-2.52	-0.84		-238.168	183.36
Na	4	naph2	-7.88523	191.75	-5.72	-1.43		-7.9237	191.47	-6	-1.5		-504.867	198.23	0.76	0.19		-504.851	198.36	0.89	0.2225		-504.804	194.61	-2.86	-0.715		-504.838	195.63	-1.84	-0.46		-504.847	192.72	-4.75	-1.1875		-504.845	191.85	-5.62	-1.405		-504.874	196.22	-1.25	-0.3125		-504.874	196.14
Na	3	nash	-10.9233	134.42	-4.88	-1.62667		-11.0295	149.25	9.95	3.31667		-561.13	139.66	0.36	0.12		-561.113	139.76	0.46	0.153333		-561.062	136.44	-2.86	-0.953333		-561.098	137.01	-2.29	-0.763333		-561.102	132.41	-6.89	-2.29667		-561.101	131.48	-7.82	-2.60667		-561.137	138.04	-1.26	-0.42		-561.137	137.86
Cl	3	nitrosylchloride	-40.6527	189.13	-24.84	-8.28		-40.9614	164.56	-49.41	-16.47		-590.164	216.57	2.6	0.866667		-590.154	216.29	2.32	0.773333		-590.065	213.34	-0.63	-0.21		-590.104	212.88	-1.09	-0.363333		-590.083	210.18	-3.79	-1.26333		-590.082	209.42	-4.55	-1.51667		-590.181	212.55	-1.42	-0.473333		-590.181	212.37
P	2	p2	-12.992	113.66	-8.31	-4.155		-13.0754	89.93	-32.04	-16.02		-682.729	120.73	-1.24	-0.62		-682.723	120.68	-1.29	-0.645		-682.657	115.66	-6.31	-3.155		-682.696	116.3	-5.67	-2.835		-682.711	116.54	-5.43	-2.715		-682.71	116.5	-5.47	-2.735		-682.741	119.29	-2.68	-1.34		-682.74	119.37
P	4	P4	-26.0505	269.06	-16.2	-4.05		-26.1713	192.76	-92.5	-23.125		-1365.53	284.42	-0.84	-0.21		-1365.51	284.31	-0.95	-0.2375		-1365.37	265.68	-19.58	-4.895		-1365.44	264.66	-20.6	-5.15		-1365.47	265.52	-19.74	-4.935		-1365.47	264.91	-20.35	-5.0875		-1365.54	278.51	-6.75	-1.6875		-1365.54	278.53
Cl	4	PCl3	-51.2144	208	-21.04	-5.26		-51.7291	168.99	-60.05	-15.0125		-1722.1	227.14	-1.9	-0.475		-1722.08	227.08	-1.96	-0.49		-1721.92	215.26	-13.78	-3.445		-1722	212.98	-16.06	-4.015		-1722.04	214.25	-14.79	-3.6975		-1722.03	213.55	-15.49	-3.8725		-1722.12	223.5	-5.54	-1.385		-1722.12	223.45
Cl	6	PCl5	-80.9437	256.75	-36.78	-6.13		-81.7614	191.87	-101.66	-16.9433		-2642.51	290.24	-3.29	-0.548333		-2642.49	290.21	-3.32	-0.553333		-2642.23	270.13	-23.4	-3.9		-2642.36	265.67	-27.86	-4.64333		-2642.41	267.68	-25.85	-4.30833		-2642.41	266.42	-27.11	-4.51833		-2642.55	284.74	-8.79	-1.465		-2642.55	284.59
P	6	PF5	-127.466	506.77	-42.69	-7.115		-128.136	369.8	-179.66	-29.9433		-840.888	556.36	6.9	1.15		-840.871	555.08	5.62	0.936667		-840.609	543.5	-5.96	-0.993333		-840.678	545.16	-4.3	-0.716667		-840.574	518.8	-30.66	-5.11		-840.572	517.48	-31.98	-5.33		-840.958	543.84	-5.62	-0.936667		-840.957	543.4
P	2	PH	-7.02059	74.99	-1.88	-0.94		-7.07482	70.52	-6.35	-3.175		-341.889	77.14	0.27	0.135		-341.886	77.1	0.23	0.115		-341.853	75.72	-1.15	-0.575		-341.872	76.1	-0.77	-0.385		-341.879	74.85	-2.02	-1.01		-341.878	74.59	-2.28	-1.14		-341.895	76.25	-0.62	-0.31		-341.894	76.24
P	3	ph2_rad	-7.64152	153.6	-4.14	-1.38		-7.69176	146.16	-11.58	-3.86		-342.515	158.09	0.35	0.116667		-342.512	158.01	0.27	0.09		-342.476	155.8	-1.94	-0.646667		-342.495	156.48	-1.26	-0.42		-342.502	154.22	-3.52	-1.17333		-342.501	153.68	-4.06	-1.35333		-342.521	156.87	-0.87	-0.29		-342.521	156.84
P	4	phosphine	-8.26929	236.5	-6.29	-1.5725		-8.31812	227.7	-15.09	-3.7725		-343.149	243.24	0.45	0.1125		-343.145	243.15	0.36	0.09		-343.107	240.82	-1.97	-0.4925		-343.127	241.73	-1.06	-0.265		-343.134	238.54	-4.25	-1.0625		-343.132	237.7	-5.09	-1.2725		-343.154	241.92	-0.87	-0.2175		-343.154	241.86
P	4	phosphorustrifluoride	-79.1027	342.21	-26.05	-6.5125		-79.5368	264.9	-103.36	-25.84		-641.096	369.19	0.93	0.2325		-641.085	368.48	0.22	0.055		-640.913	359.42	-8.84	-2.21		-640.962	360.81	-7.45	-1.8625		-640.91	348.95	-19.31	-4.8275		-640.908	348.31	-19.95	-4.9875		-641.146	364.43	-3.83	-0.9575		-641.145	364.21
P	2	PN	-16.3584	143.61	-14.12	-7.06		-16.4344	112.34	-45.39	-22.695		-396.104	156.94	-0.79	-0.395		-396.098	156.74	-0.99	-0.495		-396.042	149.83	-7.9	-3.95		-396.071	151.85	-5.88	-2.94		-396.065	150.32	-7.41	-3.705		-396.064	149.78	-7.95	-3.975		-396.114	155.43	-2.3	-1.15		-396.114	155.38
P	2	PO	-22.4316	141.09	-12.81	-6.405		-22.5378	100.31	-53.59	-26.795		-416.587	151.95	-1.95	-0.975		-416.581	151.69	-2.21	-1.105		-416.511	143.45	-10.45	-5.225		-416.541	144.84	-9.06	-4.53		-416.532	143.02	-10.88	-5.44		-416.531	142.65	-11.25	-5.625		-416.603	150.96	-2.94	-1.47		-416.603	150.93
Cl	5	POCl3	-67.1822	312.5	-38.3	-7.66		-67.7221	219.9	-130.9	-26.18		-1797.37	347.88	-2.92	-0.584		-1797.35	347.62	-3.18	-0.636		-1797.14	327.96	-22.84	-4.568		-1797.24	326.18	-24.62	-4.924		-1797.25	323.41	-27.39	-5.478		-1797.25	322.15	-28.65	-5.73		-1797.4	343.39	-7.41	-1.482		-1797.4	343.19
S	2	PS	-16.5876	95.16	-14.56	-7.28		-16.7238	76.68	-33.04	-16.52		-739.563	108.22	-1.5	-0.75		-739.556	108.17	-1.55	-0.775		-739.484	103.12	-6.6	-3.3		-739.523	102.85	-6.87	-3.435		-739.538	103.29	-6.43	-3.215		-739.538	103.32	-6.4	-3.2		-739.574	106.84	-2.88	-1.44		-739.574	106.88
S	2	s2	-20.1951	84.16	-23.86	-11.93		-20.3941	77.18	-30.84	-15.42		-796.413	106.01	-2.01	-1.005		-796.405	106.01	-2.01	-1.005		-796.329	101.89	-6.13	-3.065		-796.37	100.94	-7.08	-3.54		-796.384	101.33	-6.69	-3.345		-796.384	101.28	-6.74	-3.37		-796.424	105.03	-2.99	-1.495		-796.424	105
Cl	4	S2Cl2	-49.965	158.37	-43.41	-10.8525		-50.4903	140.17	-61.61	-15.4025		-1716.87	198.15	-3.63	-0.9075		-1716.86	198.12	-3.66	-0.915		-1716.69	185.81	-15.97	-3.9925		-1716.78	184.17	-17.61	-4.4025		-1716.81	185.46	-16.32	-4.08		-1716.8	184.66	-17.12	-4.28		-1716.9	195.37	-6.41	-1.6025		-1716.9	195.31
Cl	2	SCl	-24.9421	53.84	-16.85	-8.425		-25.2095	47.7	-22.99	-11.495		-858.389	69.06	-1.63	-0.815		-858.38	68.99	-1.7	-0.85		-858.3	64.71	-5.98	-2.99		-858.343	64.11	-6.58	-3.29		-858.358	64.57	-6.12	-3.06		-858.357	64.22	-6.47	-3.235		-858.401	68.23	-2.46	-1.23		-858.401	68.2
Cl	3	SCl2	-39.8422	100.47	-28.91	-9.63667		-40.2726	88.61	-40.77	-13.59		-1318.64	126.8	-2.58	-0.86		-1318.62	126.72	-2.66	-0.886667		-1318.5	118.21	-11.17	-3.72333		-1318.56	117.15	-12.23	-4.07667		-1318.59	118.13	-11.25	-3.75		-1318.59	117.36	-12.02	-4.00667		-1318.66	125.04	-4.34	-1.44667		-1318.66	124.99
S	7	SF6	-154.878	341.35	-134.56	-19.2229		-155.88	280.93	-194.98	-27.8543		-997.372	483.66	7.75	1.10714		-997.353	482.73	6.82	0.974286		-997.045	473.35	-2.56	-0.365714		-997.122	472.64	-3.27	-0.467143		-996.992	438.21	-37.7	-5.38571		-996.988	436.42	-39.49	-5.64143		-997.452	467.33	-8.58	-1.22571		-997.451	466.55
S	2	sh_rad	-10.6521	79.04	-8.88	-4.44		-10.7617	81.39	-6.53	-3.265		-398.76	87.89	-0.03	-0.015		-398.756	87.87	-0.05	-0.025		-398.717	86.54	-1.38	-0.69		-398.738	86.65	-1.27	-0.635		-398.744	85.29	-2.63	-1.315		-398.744	84.98	-2.94	-1.47		-398.765	87.25	-0.67	-0.335		-398.765	87.24
Si	2	si2	-7.58376	73.63	-2.81	-1.405		-6.94841	57.81	-18.63	-9.315		-578.887	75.45	-0.99	-0.495		-578.88	75.47	-0.97	-0.485		-578.824	73.83	-2.61	-1.305		-578.856	73.66	-2.78	-1.39		-578.869	72.66	-3.78	-1.89		-578.869	72.61	-3.83	-1.915		-578.892	73.57	-2.87	-1.435		-578.892	73.56
Si	4	Si2H2	-8.73871	176.31	-10.72	-2.68		-8.13697	180.64	-6.39	-1.5975		-580.06	186.91	-0.12	-0.03		-580.053	186.88	-0.15	-0.0375		-579.991	184.38	-2.65	-0.6625		-580.026	186.09	-0.94	-0.235		-580.04	183.37	-3.66	-0.915		-580.039	182.86	-4.17	-1.0425		-580.069	186.91	-0.12	-0.03		-580.068	186.89
Si	6	Si2H4	-10.0109	352.57	-10.64	-1.77333		-9.48125	401.19	37.98	6.33		-581.335	362.89	-0.32	-0.0533333		-581.329	362.81	-0.4	-0.0666667		-581.265	361.6	-1.61	-0.268333		-581.299	363.22	0.01	0.00166667		-581.313	358.61	-4.6	-0.766667		-581.312	357.82	-5.39	-0.898333		-581.344	362.39	-0.82	-0.136667		-581.344	362.27
Si	7	si2h5_rad	-10.6168	421.74	-8.85	-1.26429		-10.1269	494.86	64.27	9.18143		-581.94	430.11	-0.48	-0.0685714		-581.933	429.99	-0.6	-0.0857143		-581.869	429.98	-0.61	-0.0871429		-581.903	431.39	0.8	0.114286		-581.917	425.73	-4.86	-0.694286		-581.916	424.73	-5.86	-0.837143		-581.949	429.52	-1.07	-0.152857		-581.948	429.34
Si	2	SiCl	-18.7105	95.07	-6.32	-3.16		-18.567	88.44	-12.95	-6.475		-749.701	100.88	-0.51	-0.255		-749.692	100.87	-0.52	-0.26		-749.623	97.83	-3.56	-1.78		-749.661	97.26	-4.13	-2.065		-749.676	97.57	-3.82	-1.91		-749.676	97.48	-3.91	-1.955		-749.711	99.78	-1.61	-0.805		-749.711	99.77
Si	3	SiCl2	-33.6869	189.53	-11.54	-3.84667		-33.7106	179.82	-21.25	-7.08333		-1210.02	200.29	-0.78	-0.26		-1210	200.28	-0.79	-0.263333		-1209.89	194.81	-6.26	-2.08667		-1209.95	193.42	-7.65	-2.55		-1209.97	194.05	-7.02	-2.34		-1209.97	193.89	-7.18	-2.39333		-1210.03	198.11	-2.96	-0.986667		-1210.03	198.08
Si	2	SiH	-4.34478	72.73	-1.58	-0.79		-4.06528	88.31	14	7		-289.999	74.18	-0.13	-0.065		-289.996	74.16	-0.15	-0.075		-289.966	73.52	-0.79	-0.395		-289.983	74.02	-0.29	-0.145		-289.99	72.95	-1.36	-0.68		-289.99	72.76	-1.55	-0.775		-290.003	73.77	-0.54	-0.27		-290.003	73.71
Si	5	silane	-6.21289	311.89	-6.28	-1.256		-6.02936	386.29	68.12	13.624		-291.88	317.82	-0.35	-0.07		-291.877	317.67	-0.5	-0.1		-291.842	318.07	-0.1	-0.02		-291.861	319.7	1.53	0.306		-291.867	315.05	-3.12	-0.624		-291.866	314.26	-3.91	-0.782		-291.885	317.69	-0.48	-0.096		-291.885	317.54
Si	2	siliconmonoxide	-19.8287	184.56	-11.38	-5.69		-19.627	180.1	-15.84	-7.92		-364.77	194.94	-1	-0.5		-364.765	194.65	-1.29	-0.645		-364.701	189.45	-6.49	-3.245		-364.729	191.05	-4.89	-2.445		-364.72	189.08	-6.86	-3.43		-364.719	188.44	-7.5	-3.75		-364.785	194.49	-1.45	-0.725		-364.784	194.43
Si	5	silicontetrafluoride	-100.781	530.68	-31.63	-6.326		-101.127	523.13	-39.18	-7.836		-689.273	567.05	4.74	0.948		-689.259	565.62	3.31	0.662		-689.046	557.04	-5.27	-1.054		-689.105	560.18	-2.13	-0.426		-689.028	541.48	-20.83	-4.166		-689.025	540.19	-22.12	-4.424		-689.332	559.43	-2.88	-0.576		-689.331	559.08
Si	4	silyl_rad	-5.57163	220.53	-4.14	-1.035		-5.35089	272.04	47.37	11.8425		-291.234	224.47	-0.2	-0.05		-291.23	224.39	-0.28	-0.07		-291.197	224.42	-0.25	-0.0625		-291.215	225.61	0.94	0.235		-291.222	222.12	-2.55	-0.6375		-291.221	221.51	-3.16	-0.79		-291.238	224.21	-0.46	-0.115		-291.238	224.1
Si	3	silylene_singlet	-4.96176	148.86	-3.25	-1.08333		-4.71062	181.77	29.66	9.88667		-290.62	151.85	-0.26	-0.0866667		-290.617	151.8	-0.31	-0.103333		-290.585	151.12	-0.99	-0.33		-290.603	152.04	-0.07	-0.0233333		-290.61	149.95	-2.16	-0.72		-290.609	149.54	-2.57	-0.856667		-290.625	151.45	-0.66	-0.22		-290.624	151.35
Si	3	silylene_triplet	-4.92951	128.63	-2.06	-0.686667		-4.67374	158.62	27.93	9.31		-290.587	130.64	-0.05	-0.0166667		-290.583	130.63	-0.06	-0.02		-290.552	130.62	-0.07	-0.0233333		-290.57	131.31	0.62	0.206667		-290.576	128.89	-1.8	-0.6		-290.576	128.48	-2.21	-0.736667		-290.591	130.37	-0.32	-0.106667		-290.591	130.29
Si	2	SiN	-13.6313	109.15	-10.36	-5.18		-13.4003	114.72	-4.79	-2.395		-344.158	118.76	-0.75	-0.375		-344.153	118.68	-0.83	-0.415		-344.101	113.52	-5.99	-2.995		-344.126	115	-4.51	-2.255		-344.122	114.48	-5.03	-2.515		-344.121	114.06	-5.45	-2.725		-344.168	118.59	-0.92	-0.46		-344.167	118.52
Si	2	SiP	-10.2688	81.64	-6.74	-3.37		-10.0064	70.41	-17.97	-8.985		-630.792	88.3	-0.08	-0.04		-630.786	88.32	-0.06	-0.03		-630.724	84.1	-4.28	-2.14		-630.759	84.52	-3.86	-1.93		-630.775	84.95	-3.43	-1.715		-630.775	84.9	-3.48	-1.74		-630.802	87.32	-1.06	-0.53		-630.802	87.37
Si	2	SiS	-13.9774	134.07	-10.72	-5.36		-13.7605	123.48	-21.31	-10.655		-687.735	143.98	-0.81	-0.405		-687.728	143.95	-0.84	-0.42		-687.661	140.86	-3.93	-1.965		-687.698	140.85	-3.94	-1.97		-687.713	141.11	-3.68	-1.84		-687.713	141.1	-3.69	-1.845		-687.744	142.98	-1.81	-0.905		-687.744	143.02
S	2	SN	-19.9113	98.32	-27.41	-13.705		-20.0551	81.73	-44	-22		-452.903	122.9	-2.83	-1.415		-452.897	122.7	-3.03	-1.515		-452.837	117.37	-8.36	-4.18		-452.866	117.85	-7.88	-3.94		-452.859	116.06	-9.67	-4.835		-452.858	115.85	-9.88	-4.94		-452.915	122.47	-3.26	-1.63		-452.914	122.37
S	4	SO3	-57.7854	220.13	-133.75	-33.4375		-58.1353	165.68	-188.2	-47.05		-623.907	348.64	-5.24	-1.31		-623.896	348.11	-5.77	-1.4425		-623.732	321.36	-32.52	-8.13		-623.782	322	-31.88	-7.97		-623.733	311.73	-42.15	-10.5375		-623.732	310.97	-42.91	-10.7275		-623.939	344.15	-9.73	-2.4325		-623.938	343.88
Na	2	sodiumfluoride	-24.4057	108.04	-6.16	-3.08		-24.5381	101.79	-12.41	-6.205		-262.217	114.64	0.44	0.22		-262.201	114.5	0.3	0.15		-262.137	106.19	-8.01	-4.005		-262.165	109.28	-4.92	-2.46		-262.148	105.2	-9	-4.5		-262.146	104.37	-9.83	-4.915		-262.232	111.78	-2.42	-1.21		-262.232	111.55
Na	2	sodiumhydride	-0.748759	44.04	-2.11	-1.055		-0.736411	50.38	4.23	2.115		-162.858	45.95	-0.2	-0.1		-162.846	45.96	-0.19	-0.095		-162.835	46.21	0.06	0.03		-162.849	46.39	0.24	0.12		-162.852	44.98	-1.17	-0.585		-162.851	44.72	-1.43	-0.715		-162.861	45.7	-0.45	-0.225		-162.861	45.57
S	3	sulfurdioxide	-41.9237	182.27	-86.11	-28.7033		-42.1883	143.65	-124.73	-41.5767		-548.694	262.96	-5.42	-1.80667		-548.686	262.59	-5.79	-1.93		-548.567	246.31	-22.07	-7.35667		-548.607	246.68	-21.7	-7.23333		-548.575	238.81	-29.57	-9.85667		-548.574	238.31	-30.07	-10.0233		-548.717	260.15	-8.23	-2.74333		-548.717	259.93
S	2	sulfurmonoxide	-25.9995	105.21	-30.43	-15.215		-26.1914	90.34	-45.3	-22.65		-473.411	133.04	-2.6	-1.3		-473.404	132.82	-2.82	-1.41		-473.332	127.47	-8.17	-4.085		-473.362	127.45	-8.19	-4.095		-473.353	125.19	-10.45	-5.225		-473.352	125.01	-10.63	-5.315		-473.427	132.48	-3.16	-1.58		-473.426	132.38
Cl	6	tetrachloroethylene	-70.719	401.48	-56.06	-9.34333		-71.4439	382.31	-75.23	-12.5383		-1917.05	457.67	0.13	0.0216667		-1917.02	457.42	-0.12	-0.02		-1916.84	455.29	-2.25	-0.375		-1916.94	450.84	-6.7	-1.11667		-1916.94	444.05	-13.49	-2.24833		-1916.94	442.07	-15.47	-2.57833		-1917.08	454.41	-3.13	-0.521667		-1917.08	454.06
Si	5	tetrachloro-silane	-63.5626	330.15	-29.02	-5.804		-63.8782	287.64	-71.53	-14.306		-2130.58	357.55	-1.62	-0.324		-2130.56	357.59	-1.58	-0.316		-2130.36	347.7	-11.47	-2.294		-2130.46	343.95	-15.22	-3.044		-2130.5	343.82	-15.35	-3.07		-2130.5	343.33	-15.84	-3.168		-2130.61	354.51	-4.66	-0.932		-2130.61	354.4
S	7	thiirane	-23.7091	577.32	-39.87	-5.69571		-23.8745	571.31	-45.88	-6.55429		-476.788	618.87	1.68	0.24		-476.78	618.84	1.65	0.235714		-476.715	621.24	4.05	0.578571		-476.746	619.69	2.5	0.357143		-476.733	610.81	-6.38	-0.911429		-476.725	605.68	-11.51	-1.64429		-476.798	616.01	-1.18	-0.168571		-476.797	615.69
S	9	thiophene	-34.9664	879.38	-74.79	-8.31		-35.2135	882.59	-71.58	-7.95333		-553.013	955.17	1	0.111111		-553.002	955.11	0.94	0.104444		-552.909	956.41	2.24	0.248889		-552.95	953.76	-0.41	-0.0455556		-552.923	942.95	-11.22	-1.24667		-552.915	938.23	-15.94	-1.77111		-553.03	952.36	-1.81	-0.201111		-553.029	951.8
Cl	4	trichloro-borane	-47.5268	286.81	-25.49	-6.3725		-48.0352	274.81	-37.49	-9.3725		-1405.62	312.73	0.43	0.1075		-1405.6	312.85	0.55	0.1375		-1405.48	313.75	1.45	0.3625		-1405.55	310.58	-1.72	-0.43		-1405.56	306.82	-5.48	-1.37		-1405.56	306.23	-6.07	-1.5175		-1405.64	311.3	-1	-0.25		-1405.64	311.21
[truncated: 75 more columns]

## Sheet: RMSD-LDA
	pc-3	pc-2	pc-2-u	pc-1	pc-1-u	pc-1-u X2C		def2-QZVP	def2-TZVP	def2-TZVP-u	def2-SVP	def2-SVP-u		cc-pVQZ	cc-pVTZ	cc-pVTZ-u	cc-pVDZ	cc-pVDZ-u		6-311G(2df,2pd)	6-311G(2df,2pd)-u	6-31G(d,p)	6-31G(d,p)-u		SBKJC	Stuttgart		L1-u	L2-u	L1	L2	L0.5
MaxAE	0.0334315	0.202114	0.146912	0.32479	0.36599	0.36599		0.040921	0.241932	0.24114	0.257366	0.282701		0.0412942	0.0873107	0.0821617	0.144779	0.122552		0.0554437	0.0860667	0.215224	0.33817		0.484193	0.484618		0.369926	0.0536079	0.373773	0.0567632	0.276338
MAE	0.00245206	0.00584841	0.00543708	0.018216	0.0145956	0.0145244		0.00307482	0.0060789	0.00565453	0.0166666	0.0128869		0.00403795	0.00677333	0.00678823	0.0183143	0.0144876		0.005618	0.00547964	0.0149569	0.0125725		0.0414309	0.0639447		0.0144833	0.00458843	0.0188105	0.00527942	0.0209745
1,3-butadiene	0.00999792	0.0175341	0.0131108	0.0296046	0.0269861	0.0267596		0.0126714	0.0157791	0.014021	0.0627491	0.0240106		0.0116798	0.0144561	0.0142188	0.0425585	0.0202884		0.013182	0.0135225	0.030041	0.0136109		0.0512138	0.0730002		0.0231663	0.0149456	0.0248686	0.0155303	0.02945
2-butyne	0.00489681	0.00565184	0.00577871	0.0168181	0.01003	0.00965216		0.00471579	0.00663672	0.00630368	0.0221867	0.00938149		0.00512737	0.00632985	0.00617281	0.0237447	0.0144239		0.00552885	0.00569512	0.0187032	0.0104665		0.0548757	0.0322772		0.00962077	0.00584041	0.0155129	0.00580182	0.027758
2-methyl-1-propene	0.0148081	0.0173203	0.0176034	0.0250018	0.0227074	0.0224224		0.0165217	0.0185777	0.0187151	0.0267262	0.0233517		0.0164067	0.0188891	0.0187295	0.0271715	0.023958		0.0189433	0.0192416	0.0260709	0.0225999		0.0468158	0.036129		0.0210611	0.0176627	0.0233301	0.0178316	0.0271098
acetaldehyde	0.00397956	0.00456376	0.00474341	0.0117441	0.0105495	0.0101711		0.00399197	0.00589823	0.0054568	0.0128473	0.0109019		0.00437151	0.00612118	0.00579795	0.0137176	0.0109036		0.00716286	0.00660918	0.011876	0.010664		0.0292476	0.022296		0.00851479	0.00462325	0.0100912	0.00459931	0.0228143
acetamide	0.00416888	0.00492393	0.00524973	0.0129486	0.0107321	0.0106917		0.00449206	0.00579509	0.00565616	0.0139578	0.00971905		0.00457966	0.00545764	0.00498403	0.0144532	0.0108234		0.00562977	0.00551198	0.0121791	0.00985406		0.0330574	0.0247621		0.0112349	0.00799	0.0133067	0.00765559	0.0264179
aceticacid	0.00539234	0.00582855	0.00585377	0.0104594	0.00814893	0.00801255		0.00517406	0.00629712	0.00588603	0.0118757	0.00724282		0.00500312	0.00541366	0.00521642	0.0134223	0.00853189		0.00523047	0.00475686	0.0107642	0.00806528		0.0295509	0.030091		0.0101583	0.00631701	0.0114486	0.00630865	0.0185559
acetone	0.0148562	0.0168649	0.017335	0.0305144	0.0298053	0.0297487		0.0161504	0.0203379	0.019562	0.0285175	0.0287946		0.0165721	0.0194587	0.0192304	0.0283981	0.027618		0.0217413	0.0204043	0.0270636	0.0258822		0.0440422	0.0400303		0.0246212	0.0178824	0.0262642	0.0181443	0.0282938
acetonitrile	0.00195034	0.00274781	0.00245331	0.00952092	0.00569101	0.00554372		0.00202273	0.00314753	0.0030126	0.0125223	0.00577181		0.00208649	0.00307009	0.00294603	0.0138712	0.00812834		0.00286621	0.00283562	0.0108099	0.00615983		0.0320491	0.0197024		0.0049906	0.00248269	0.0084362	0.00266421	0.018189
acetylene	0.000162069	0.000767849	0.000499162	0.0110645	0.00242998	0.00222264		0.000131912	0.00154862	0.000931607	0.0144135	0.00160725		6.78924e-05	0.000633948	0.000631541	0.0137174	0.00529213		0.000139982	0.000240539	0.0076957	0.00128761		0.0338773	0.0174996		0.000931322	0.000237118	0.00867939	0.000725857	0.00779248
acetylfluoride	0.00376071	0.00433295	0.00436551	0.00886134	0.00696211	0.00678885		0.00383982	0.00459056	0.00447178	0.0114029	0.00681133		0.00377571	0.0041164	0.00413949	0.01196	0.00777897		0.00381231	0.00359788	0.0102423	0.0074486		0.0277053	0.0272949		0.00834708	0.00434496	0.00963443	0.00424431	0.0181668
acrylonitrile	0.00168951	0.00409068	0.0025914	0.0131032	0.00775624	0.00871613		0.00183647	0.0033484	0.0030449	0.0162518	0.00742081		0.00194761	0.00298448	0.00282891	0.0158084	0.00927942		0.00233127	0.00229623	0.011772	0.00628528		0.0398879	0.0265697		0.00670965	0.00434269	0.0110785	0.00468342	0.0161588
allene	0.00108626	0.00225481	0.00166773	0.0127143	0.00584358	0.0053387		0.00138717	0.00300754	0.00246889	0.0175353	0.00616541		0.00124155	0.00214901	0.00192792	0.0171641	0.00933888		0.00134855	0.00167417	0.0126742	0.00558899		0.0430771	0.0251656		0.00431429	0.00148748	0.0102616	0.00191192	0.014875
ammonia	0.0011673	0.00469282	0.00427722	0.0058834	0.00488301	0.00452147		0.000810405	0.00438566	0.00338565	0.012296	0.00700932		0.00230684	0.00470913	0.00489214	0.0211822	0.0104724		0.00942293	0.00973014	0.00714721	0.00459049		0.0174967	0.0103879		0.0186784	0.00633621	0.0166332	0.0062741	0.0436291
aziridine	0.00361754	0.00576518	0.00546409	0.0145942	0.0103017	0.0100464		0.00424224	0.00609624	0.00578648	0.0167539	0.00939523		0.00402046	0.00481574	0.00464114	0.0152396	0.0101858		0.00450488	0.00470302	0.0118882	0.00871877		0.0273792	0.0328216		0.0134047	0.00592977	0.016782	0.00620741	0.0333637
b2	4.5e-05	0.000381	0.000144	0.00503	0.000893	0.000835		0.000175	0.001117	0.000569	0.008918	0.002548		0.000135	0.001087	0.000685	0.009611	0.004961		0.000159	0.000281	0.004512	0.000855		0.030712	0.020631		0.00210116	8.48192e-05	0.00463583	3.86918e-05	0.0113044
b2h6	0.00253588	0.00622175	0.00341244	0.0151373	0.00693749	0.00712626		0.00353392	0.00521993	0.00494624	0.0213503	0.00866241		0.00390558	0.00483264	0.00445503	0.0223145	0.00950468		0.0037064	0.00413133	0.0102148	0.00657574		0.0256619	0.0300944		0.00595235	0.00411846	0.0118422	0.00453881	0.0233565
be2	0.0002245	0.001316	0.00031	0.006155	0.0025575	0.00263		0.001292	0.008937	0.005142	0.0135575	0.008673		0.000815	0.000982	0.0010675	0.0093185	0.00338		0.0004055	0.0012375	0.009941	0.005028		0.057698	0.034417		0.0243585	0.000829104	0.0245546	0.00660244	0.0175891
be2h4	0.000647684	0.00197681	0.00167207	0.00841005	0.00402886	0.00390568		0.001275	0.012689	0.00401063	0.0222775	0.00281052		0.000529687	0.00286602	0.00210113	0.0204293	0.00335024		0.00238132	0.00184801	0.0110756	0.000842703		0.0291436	0.0368582		0.00684058	0.0025849	0.00557515	0.0025849	0.0157072
bec2	0.0002537	0.000919554	0.00112409	0.00340638	0.00112963	0.0010908		0.00127692	0.00548948	0.00187984	0.00891457	0.00173794		0.000156188	0.00284225	0.00157754	0.0101808	0.00385094		0.000960862	0.000564536	0.0075084	0.00208828		0.0300254	0.0242423		0.000634813	0.00116691	0.00266303	0.000907655	0.00809039
be-ch32	0.00301543	0.00229182	0.00175559	0.0112331	0.00483934	0.00473814		0.00165593	0.00400074	0.00277351	0.0125751	0.00371393		0.00294941	0.00234386	0.00173811	0.0122163	0.00505416		0.00191835	0.00160489	0.00993941	0.00263534		0.0382504	0.0250618		0.00440548	0.00210717	0.00821859	0.00274023	0.021885
bef2	0.000345409	0.00057402	0.000206637	0.00225762	0.00127701	0.00136601		0.00287979	0.00523946	0.00078467	0.00929826	0.00905168		0.000196026	0.00294511	0.000778954	0.025482	0.00151461		0.00025888	0.00154155	0.00692879	0.00461647		0.018848	0.0356572		0.00022825	0.00200771	0.00257978	0.00246893	0.0107862
beh2	4.89898e-05	0.000162483	0.000618088	0.00317046	0.000248215	0.000169831		0.000387019	0.00666098	0.0010198	0.00892757	0.0014999		0.00022372	0.00140111	0.00068749	0.0108251	0.00196367		0.00147949	0.000516026	0.00595389	0.000787919		0.0153403	0.0208974		0.00213763	0.000818626	0.00107718	0.00035153	0.0105531
benzene	0.00346831	0.00513897	0.00474232	0.0153937	0.0106316	0.0102766		0.00417624	0.00582737	0.00556311	0.019591	0.0113485		0.00396466	0.00538051	0.00505786	0.0195899	0.0126032		0.00454279	0.0045714	0.0141649	0.00946493		0.044901	0.0268312		0.00886596	0.00477528	0.0131224	0.00503524	0.0210145
beo	0.000286	3.5e-05	0.000119	0.000651	0.001127	0.001133		0.001626	0.004254	0.00131	0.010617	0.002069		9e-06	0.002141	0.000398	0.01017	0.000482		1.8e-05	0.000743	0.004781	5.7e-05		0.014127	0.019799		0.000646443	0.000600938	0.0010055	0.000821242	0.000797823
beoh	0.0050283	0.0193296	0.0183368	0.0591177	0.0285493	0.0271298		0.00298577	0.0253788	0.0173452	0.0712005	0.0533024		0.0171602	0.0453421	0.0438846	0.10097	0.0796622		0.0205488	0.0219962	0.0706332	0.0509271		0.0398839	0.305571		0.0447661	0.0180229	0.0642419	0.0173252	0.0993622
berylliumhydride	1.3e-05	0.000745	0.000424	0.003221	0.001165	0.001129		0.000321	0.00476	0.00087	0.007243	0.000164		7e-06	0.001535	0.000502	0.008956	0.001283		0.001232	0.000374	0.005466	8e-05		0.010668	0.013808		0.000532774	0.000524358	0.00069092	0.00017927	0.00871459
bf	3.4e-05	0.000817	0.0005425	0.009206	0.00217	0.00208		0.000324	0.002198	0.00199	0.002171	0.000362		0.000294	0.002054	0.001508	0.01154	0.005528		0.000195	0.000341	0.007526	0.002617		0.019679	0.03595		0.00528093	0.00163806	0.0123287	0.00187731	0.00909548
bh	9.4e-05	0.001518	0.000631	0.007553	0.003184	0.003223		0.0002245	0.001111	0.000806	0.008129	0.003679		0.000216	0.00119	0.001222	0.01228	0.005257		0.00135	0.001442	0.007516	0.004092		0.012914	0.012761		0.00454598	0.00043629	0.00685143	0.00086583	0.0107003
bh3	0.000152431	0.00145757	0.000389303	0.0093427	0.00298728	0.00282273		0.000367787	0.00203256	0.00153955	0.0151885	0.00532511		0.000164508	0.00103718	0.000810553	0.0148502	0.00418146		0.00105178	0.000693675	0.00493604	0.00119208		0.0149916	0.0181539		0.00127187	0.00038003	0.00539237	0.00108201	0.0147785
bicyclobutane	0.0111478	0.0134851	0.0131321	0.0215536	0.0179699	0.0177405		0.0115374	0.014348	0.0138278	0.0250409	0.0181876		0.0121245	0.0131707	0.0124218	0.0239418	0.0195894		0.0134689	0.0134709	0.0220611	0.0182648		0.0427201	0.0431059		0.0174946	0.0138163	0.0204755	0.0141953	0.0330647
BN	2.2e-05	0.000262	0.000114	0.004079	0.000705	0.000764		0.000107	0.000913	0.000614	0.002923	0.00021		9e-06	0.001639	0.001013	0.006207	0.001524		0.000739	0.000255	0.005434	0.001426		0.018239	0.016789		0.00109872	0.000167346	0.00441576	0.000381981	0.00387175
bo	1.1e-05	0.000232	0.000237	0.004301	0.000552	0.000545		0.000149	0.001199	0.000871	0.002449	0.000252		0.000116	0.001752	0.001154	0.0049485	0.000826		0.000569	0.00017	0.005396	0.001356		0.0155505	0.013785		0.00165199	0.000492041	0.00562744	0.000797701	0.00531084
Boranamine	0.00165832	0.00244839	0.00208875	0.00962007	0.00336361	0.00320348		0.00168108	0.00319799	0.00277832	0.0129105	0.00366098		0.00165228	0.00277992	0.00237964	0.011888	0.00423908		0.00173081	0.00174631	0.00675638	0.00263686		0.0237618	0.0192687		0.00361619	0.00197705	0.0081864	0.0024248	0.0144428
borazine	0.0025129	0.00383184	0.00370898	0.0122018	0.00607457	0.00586827		0.003048	0.00504517	0.00482203	0.0141631	0.0055099		0.00287606	0.00525617	0.00496154	0.0147181	0.00812654		0.00383255	0.00362228	0.0101522	0.00568149		0.0368304	0.0251948		0.00671268	0.00401694	0.0119592	0.00436605	0.0193223
boric-acid	0.00349283	0.00411313	0.00437619	0.0061587	0.00153542	0.00167296		0.00362926	0.00441864	0.00415658	0.00535715	0.00813128		0.00287047	0.00264464	0.00235392	0.0121483	0.00935623		0.00285155	0.00234563	0.00940372	0.00606497		0.0214529	0.0388155		0.00330675	0.00665588	0.00741605	0.00677288	0.0185125
boron-trioxide	0.005169	0.0135741	0.00221288	0.260605	0.0626003	0.0633505		0.00387104	0.00231578	0.0044162	0.257366	0.00759199		0.00388481	0.0035157	0.00303252	0.0261077	0.0450712		0.0512932	0.00748979	0.0328656	0.0093112		0.0732998	0.266241		0.0320839	0.0270912	0.0304727	0.0266269	0.0890946
c2	1.4e-05	0.00049	0.00019	0.005353	0.002131	0.002003		5.6e-05	0.00095	0.000529	0.00743	0.002648		5.6e-05	0.00092	0.000437	0.008713	0.004801		2.7e-05	9e-06	0.006211	0.001776		0.029527	0.01258		0.00151881	1.68476e-05	0.00402927	0.000229745	0.00185088
c2h3_rad	0.000805321	0.00348441	0.00250972	0.00961685	0.00506344	0.00497859		0.00108069	0.00218774	0.00211803	0.0136314	0.00661692		0.00112124	0.00186391	0.00192112	0.0130257	0.00634164		0.00184598	0.00138834	0.00774143	0.00427453		0.0290658	0.0188026		0.00373276	0.00271317	0.00722162	0.00315461	0.0192982
c2h5_rad	0.0021168	0.00300417	0.00273652	0.010876	0.00661408	0.00646974		0.00217083	0.00373789	0.00341517	0.0142375	0.00772433		0.00228087	0.00324022	0.00315992	0.0147184	0.00883556		0.0037927	0.00342913	0.0093679	0.00626923		0.0277037	0.0204402		0.00533442	0.00271307	0.00843524	0.00297236	0.0327656
carbondioxide	0.000115967	0.000610531	0.000518536	0.00541208	0.00239145	0.00243393		0.000158725	0.00075674	0.000765615	0.00369936	0.00101192		0.000126852	0.00140906	0.00106429	0.00760312	0.00359061		0.000352491	0.000264192	0.00947227	0.00493819		0.0231231	0.0240715		0.00353237	0.000966708	0.00815736	0.0010873	0.00252017
carbonicdifluoride	0.000390796	0.000979765	0.00109181	0.00484123	0.00379095	0.00382283		0.000594175	0.000915299	0.00129857	0.00194408	0.000887899		0.000415774	0.00124708	0.0011941	0.00573622	0.00501088		0.00100911	0.000724618	0.00661665	0.00532842		0.0193759	0.0393345		0.00675187	0.00188552	0.00841656	0.00191286	0.00750263
carbonmonoxide	2.5e-05	0.000678	0.000391	0.0052	0.002364	0.002312		5e-05	0.000698	0.0006075	0.003847	0.000991		9.3e-05	0.001344	0.000966	0.006272	0.002313		0.000563	0.0003085	0.0078	0.003684		0.018107	0.017078		0.00317154	0.000695858	0.00679291	0.00113672	0.00255382
carbontetrafluoride	0.00110309	0.00177314	0.00186717	0.00430764	0.00388991	0.00397201		0.00139589	0.00173418	0.00216826	0.00101081	0.000809233		0.00118126	0.00172742	0.00172595	0.00421833	0.00509199		0.000952069	0.000571297	0.00426272	0.0052505		0.0173659	0.0412203		0.00726144	0.00273124	0.00844611	0.0027981	0.00422104
cch_rad	6.15822e-05	0.000669754	0.000325015	0.00838307	0.00231936	0.00218733		6.46715e-05	0.00130966	0.000736739	0.0112552	0.00168405		8.92031e-05	0.000655431	0.000488573	0.0110674	0.00473602		6.85418e-05	0.000144905	0.00690348	0.00147176		0.0304821	0.0148297		0.0012533	8.40629e-05	0.00630688	0.000495198	0.00529447
ch_rad	6e-05	0.001062	0.000594	0.006738	0.003385	0.003446		0.000142	0.000983	0.0007615	0.005985	0.002714		0.000319	0.001238	0.001199	0.009496	0.005518		0.00089	0.00118	0.005844	0.004482		0.010914	0.013512		0.00381562	0.000476245	0.0062774	0.000851218	0.0105344
ch3ch2o_rad	0.00623103	0.00691157	0.0067353	0.0134854	0.0105914	0.0105537		0.00629105	0.00689007	0.00683457	0.0147496	0.0100563		0.00591812	0.00637265	0.00632378	0.0151368	0.0118643		0.00634964	0.00642881	0.0124172	0.0103274		0.0283016	0.0322048		0.0111979	0.0071533	0.0131097	0.00723075	0.0305732
ch3co_rad	0.00245299	0.0028852	0.00286707	0.00986848	0.00828362	0.00791049		0.00248229	0.00368332	0.00356623	0.0113983	0.00773166		0.00274749	0.00394478	0.00397335	0.0129168	0.00921583		0.00526615	0.00470087	0.0118133	0.00962627		0.0290206	0.0236946		0.00714488	0.00288938	0.00873138	0.00297887	0.019957
ch3o_rad	0.00111098	0.0018047	0.00161139	0.00825889	0.00575162	0.00570779		0.00118071	0.00259057	0.00248099	0.0117889	0.00705292		0.00170224	0.00306481	0.00303267	0.0121133	0.00779268		0.00435685	0.00434208	0.00923726	0.00730629		0.0188128	0.0244295		0.00596472	0.00178464	0.00814992	0.00183401	0.0179404
cyano_rad	7e-06	0.00055	0.000279	0.005359	0.002454	0.002414		5e-05	0.000719	0.000462	0.005406	0.001807		0.000107	0.0009815	0.000523	0.007715	0.003692		0.000303	0.000183	0.007103	0.002897		0.019617	0.013876		0.00191868	0.000137419	0.00471242	0.000519905	0.000773875
cyanogen	0.000390554	0.000703625	0.000645425	0.0094906	0.00383973	0.00348925		0.000358279	0.0014616	0.00114261	0.0116101	0.00189655		0.000413176	0.0013714	0.00140916	0.0137159	0.00676008		0.000500912	0.000575439	0.0122057	0.00461464		0.0439731	0.0174485		0.00257879	0.000741409	0.00885345	0.00100628	0.00608634
cyclobutane	0.00855446	0.0323275	0.0282972	0.0313779	0.0268072	0.024958		0.0222075	0.0283471	0.0264487	0.0363077	0.0259458		0.0238308	0.0236296	0.0272568	0.0285797	0.0321635		0.0252973	0.0268733	0.0245055	0.025145		0.0366738	0.0983819		0.0243929	0.0244429	0.0352299	0.0267077	0.0433829
cyclobutene	0.00513783	0.00584028	0.00589977	0.0134194	0.00947399	0.00934578		0.00534369	0.00664156	0.0064884	0.0159339	0.00995603		0.00498206	0.00632769	0.00625323	0.017109	0.01194		0.00604802	0.00623847	0.0114248	0.00861959		0.0355188	0.0279482		0.00817011	0.0059215	0.0112305	0.00610575	0.0267811
cyclopropane	0.00310886	0.0050198	0.00486966	0.0144513	0.0092708	0.00916393		0.0037815	0.00562546	0.00541893	0.0170583	0.00992806		0.00369161	0.00505089	0.00483934	0.0169452	0.0109327		0.0047912	0.00505376	0.0121575	0.00818288		0.0309095	0.0287828		0.00757492	0.00491014	0.0118258	0.00533271	0.0225649
cyclopropene	0.00149003	0.00188429	0.00186818	0.0109806	0.00540878	0.00528822		0.00158601	0.00266275	0.00243292	0.0145543	0.00601894		0.00149072	0.00228445	0.00223957	0.0153572	0.00823981		0.00198997	0.00205075	0.00913019	0.00482386		0.0337218	0.0244179		0.00388644	0.00172275	0.00839217	0.00192276	0.0179406
difluorinemonoxide	0.000659024	0.00290665	0.00267798	0.0140908	0.011851	0.0120103		0.00145967	0.00213471	0.00237519	0.00278451	0.00443059		0.00147973	0.00360608	0.00316782	0.00949628	0.0105267		0.00104076	0.000710797	0.00734597	0.00935306		0.0141486	0.0580468		0.0130955	0.00342832	0.013757	0.00389278	0.0134065
difluoromethane	0.00100185	0.00157284	0.00147154	0.00540791	0.00376922	0.00380656		0.00108575	0.00200108	0.00195723	0.00912347	0.00407558		0.00108126	0.00179871	0.00176858	0.00882042	0.00571621		0.0032136	0.00310789	0.0072849	0.00579991		0.0172219	0.0293969		0.00574999	0.0020055	0.00724702	0.00214851	0.0132462
dimethylamine	0.0101084	0.0150439	0.0146924	0.028129	0.0224881	0.0224415		0.0126188	0.0140246	0.0137611	0.0329227	0.0222761		0.013508	0.0135407	0.0131318	0.0211845	0.0180614		0.0149814	0.0141217	0.0187403	0.0168847		0.0303823	0.062697		0.0249338	0.0165419	0.0292099	0.0175228	0.0470897
dimethylether	0.0120413	0.0161371	0.0158483	0.0274752	0.0221283	0.0218061		0.0145137	0.0174748	0.0170576	0.0318317	0.0223799		0.0165518	0.0163371	0.0160203	0.0219429	0.0193641		0.0171768	0.0168441	0.0216582	0.0204422		0.0311547	0.0597968		0.0248787	0.0180961	0.028673	0.0187095	0.0255822
ethane	0.00273728	0.00344529	0.00334757	0.0104006	0.00660928	0.00649061		0.00263067	0.00391581	0.00372983	0.013422	0.00743031		0.00270162	0.00372273	0.00344609	0.0141311	0.00848183		0.00336068	0.00350415	0.00783843	0.00517997		0.0252524	0.0204851		0.00545784	0.00324718	0.00843794	0.0035694	0.0195254
ethanedial	0.00261373	0.0033652	0.00352723	0.00775623	0.00580936	0.00578485		0.00291407	0.00343637	0.00366559	0.0100503	0.0069691		0.00320458	0.0036395	0.00361688	0.0116317	0.00836184		0.00490755	0.00467681	0.00900743	0.0067823		0.0313424	0.0203412		0.00629458	0.00355197	0.00749749	0.00351152	0.0225292
ethanol	0.00513951	0.00568312	0.00574304	0.0110412	0.00898755	0.00892899		0.0052393	0.00590458	0.00582222	0.0127671	0.00878779		0.00480695	0.00555832	0.00548158	0.0142004	0.0106367		0.00623681	0.00635511	0.00973523	0.00819535		0.0283635	0.0260805		0.00942492	0.0063257	0.011241	0.00651793	0.02272
ethylamine	0.0105287	0.012504	0.0124341	0.0163896	0.0141563	0.0137356		0.00953774	0.00972135	0.00931486	0.0150731	0.0101789		0.0076562	0.00689989	0.00651272	0.017205	0.0120201		0.00621935	0.0063055	0.0114927	0.00919688		0.0283462	0.0396555		0.0234285	0.014435	0.024446	0.0148487	0.0404384
ethylene	0.000973697	0.00227269	0.00180685	0.0102817	0.00517064	0.00501871		0.00111128	0.00265363	0.00226281	0.0136345	0.00595999		0.00110016	0.00180645	0.00173655	0.0134717	0.0070492		0.00125872	0.00151278	0.00839762	0.00400324		0.027826	0.0193647		0.00347228	0.00153941	0.00762252	0.00191408	0.0142192
ethyleneoxide	0.00324574	0.00468463	0.00460067	0.0126931	0.00874186	0.00863067		0.00341359	0.00503716	0.00487097	0.0166757	0.00993192		0.00345842	0.00444543	0.00440211	0.0152662	0.0100788		0.00444357	0.00467446	0.0118601	0.00878583		0.0277606	0.0334796		0.0077658	0.00482063	0.0107262	0.00496434	0.0219279
f2	0.000207	0.00223	0.001895	0.010336	0.007978	0.008024		0.00074	0.000299	0.000511	0.001561	0.000467		0.000495	0.000919	0.000419	0.006131	0.007591		0.000655	0.001424	0.004241	0.005992		0.007045	0.036141		0.00945499	0.00204077	0.00996097	0.00216332	0.0106002
fluoro-ethene	0.00140514	0.00274887	0.00243305	0.0100436	0.00648939	0.00637714		0.00168411	0.00294206	0.00276417	0.0120514	0.00597288		0.00153242	0.00225809	0.0022463	0.0121814	0.00748769		0.00286539	0.00272134	0.00853694	0.00544944		0.0296053	0.0267725		0.006143	0.00246548	0.00929986	0.00264848	0.0135694
formaldehyde	0.000377882	0.00105793	0.000920294	0.00764837	0.00432314	0.00428022		0.000399663	0.00172541	0.00158159	0.0111577	0.00616754		0.000854969	0.0023113	0.00218465	0.0116259	0.00710194		0.00336397	0.00331639	0.00878051	0.00606405		0.0171601	0.0182748		0.00380565	0.000900635	0.00616265	0.00107232	0.0165026
formicacid	0.00233959	0.00349825	0.00340968	0.0064825	0.00489831	0.00487009		0.0025435	0.00305771	0.00308595	0.00646634	0.0043975		0.00195591	0.0023092	0.00217063	0.0105482	0.00685017		0.00200152	0.00217877	0.00698713	0.00509746		0.0195411	0.034242		0.00877362	0.00433105	0.00962922	0.00432024	0.0268537
furan	0.00255209	0.00359959	0.00334719	0.0114655	0.00712796	0.00693867		0.00291407	0.00401299	0.00393479	0.0142752	0.00748615		0.00278945	0.00372301	0.00355781	0.0149188	0.0091486		0.00311346	0.00302479	0.00974799	0.00682781		0.0360634	0.0314163		0.00653393	0.00354777	0.00977007	0.00376348	0.0184084
h2	3e-05	0.00074	0.000161	0.005174	0.000916	0.000964		4.9e-05	0.000921	0.000791	0.007925	0.001305		0.000114	0.000496	0.00035	0.00833	0.001544		0.000456	0.000337	1.1e-05	3.6e-05		0.002845	0.007925		0.000382455	0.000123361	0.00257701	0.00166115	0.00676553
h2coh_rad	0.00131803	0.00217678	0.0031368	0.0232613	0.0180505	0.0177509		0.0030435	0.00885202	0.00738415	0.01965	0.022721		0.00770919	0.0104758	0.0104373	0.0242186	0.0191633		0.0152403	0.0137205	0.0310222	0.0272621		0.0332012	0.0304781		0.0125398	0.00321956	0.0156058	0.00355429	0.0556457
hco_rad	0.000382423	0.00101381	0.000690839	0.00660505	0.00428943	0.00438454		0.000362523	0.00139868	0.00134438	0.00787477	0.00387248		0.000611505	0.00175441	0.00160576	0.00920773	0.00524235		0.00179165	0.00167369	0.00682238	0.00476617		0.0170448	0.0194508		0.00345835	0.00117344	0.00597046	0.00146006	0.0123
hydrazine	0.00171349	0.00710241	0.00548411	0.00974046	0.00784735	0.00704004		0.00166151	0.00514362	0.00352608	0.0142471	0.00553206		0.00299992	0.00622934	0.00725515	0.0216682	0.0130561		0.0117269	0.0119806	0.00735279	0.00657502		0.0297503	0.0410427		0.0241291	0.00828556	0.0246727	0.00876753	0.0736949
hydrogencyanide	9.73566e-05	0.000567214	0.000324611	0.00781058	0.00233264	0.00223661		9.84496e-05	0.000943545	0.000693438	0.0092438	0.00162694		0.000307256	0.000675138	0.000560464	0.00981745	0.00405125		0.00023443	0.000127562	0.00696374	0.0026925		0.020819	0.0142765		0.00127304	0.000251331	0.0059618	0.000717156	0.00571539
hydrogenfluoride	4e-06	0.000252	5e-05	0.00359	0.000244	0.000222		0.0002	0.00071	0.000524	0.000364	0.002265		0.000355	8.8e-05	1.8e-05	0.001715	0.001249		0.001306	0.001033	0.000586	0.000352		0.00634	0.004561		0.00182611	0.000604912	0.00560357	0.0014171	0.0110457
hydrogenperoxide	0.00406966	0.0128013	0.0127351	0.0248269	0.0260085	0.0240584		0.00448388	0.0152476	0.0146774	0.0323506	0.0305137		0.00174091	0.00420289	0.00481751	0.0183593	0.02182		0.00391691	0.00372148	0.0200908	0.0211221		0.0139041	0.141351		0.0253682	0.0130329	0.0246426	0.0138266	0.0375175
isobutane	0.0139022	0.0163419	0.0161942	0.0284272	0.0234853	0.023194		0.0151493	0.0172935	0.016944	0.0289491	0.0231417		0.0135276	0.0166629	0.0166053	0.027244	0.023626		0.0165628	0.0166008	0.0236578	0.0196358		0.0439174	0.0399456		0.0211164	0.0163886	0.0251756	0.0172653	0.0270597
isopropanol	0.0194599	0.0258842	0.0251732	0.0402771	0.0375205	0.0372141		0.0190333	0.0269341	0.024027	0.0344122	0.0326946		0.0220652	0.0242826	0.0233803	0.0315061	0.0331124		0.0290371	0.029666	0.0321688	0.0334485		0.0433086	0.0535232		0.0400662	0.0235922	0.0407825	0.0242065	0.0574408
isopropyl_rad	0.0233951	0.0177265	0.0430653	0.0607979	0.0382816	0.0348421		0.0180383	0.0437729	0.0496392	0.0678111	0.0567676		0.0412942	0.0508796	0.0490016	0.0717327	0.0572925		0.0554437	0.0492303	0.0729855	0.0674269		0.0598362	0.0685542		0.0616218	0.0215382	0.0235812	0.0218966	0.0878628
ketene	0.000825191	0.00198041	0.00157101	0.00989458	0.0048221	0.00464941		0.000971314	0.00231143	0.00203421	0.0122557	0.00447535		0.00096341	0.00187331	0.00169476	0.0128712	0.00678849		0.00120146	0.00112921	0.0107798	0.00536409		0.0333744	0.0236051		0.00450932	0.0018321	0.00939093	0.00202853	0.011156
li2	0.000266	0.010843	0.000208	0.013863	0.001014	0.000906		0.000179	0.007077	0.006732	0.03226	0.00546		0.003344	0.000151	6.2e-05	0.012344	0.000789		0.002719	0.000381	0.02386	0.004905		0.096776	0.08695		0.00082078	0.000101865	0.000815247	0.000113413	0.000852548
li2c2	0.00132415	0.000746438	0.000461206	0.00544396	0.00122328	0.00109712		0.00238508	0.00340244	0.00276808	0.00504904	0.00622246		0.0014326	0.00227771	0.000743977	0.0266408	0.00526447		0.000884862	0.00173692	0.0163496	0.00192446		0.052515	0.0615999		0.00181784	0.000959645	0.00263218	0.00205933	0.0114877
li2nh	0.000401512	0.000533403	0.00989991	0.0184754	0.0258845	0.0259142		0.00954012	0.0118932	0.0101349	0.0137788	0.0218343		0.00381337	0.0199774	0.00572	0.0536598	0.0201136		0.0149341	0.00998185	0.0239796	0.00687001		0.0575397	0.0642648		0.0408584	0.00393892	0.043399	0.00490288	0.0336999
li2o	3.63436e-05	0.00224131	0.00418945	0.00179551	0.00347748	0.00353626		0.0025883	0.00258913	0.00187225	0.00698105	0.0122181		0.000573181	0.00413066	0.00186571	0.0237151	0.00651892		0.00350931	0.000830418	0.0180862	0.000678584		0.0365219	0.0577704		0.0101476	0.000475705	0.0100006	0.00251529	0.0322103
li2o2	0.000808774	0.0025595	0.00347322	0.0143498	0.0104976	0.0106465		0.00218081	0.00380055	0.00389357	0.0033856	0.0101713		0.00109624	0.00367902	0.0016707	0.0224727	0.0104166		0.00274996	0.00208078	0.015165	0.0120011		0.0344453	0.0675138		0.00949013	0.00263445	0.00927351	0.00386481	0.0300682
lich3	0.00107591	0.00366434	0.00187674	0.0151513	0.00593537	0.00594855		0.00269105	0.00450967	0.00428744	0.0151088	0.00419006		0.00134143	0.00313351	0.00184244	0.0126759	0.00643423		0.00133952	0.00121243	0.00757521	0.00168602		0.0306722	0.041016		0.00314711	0.00273432	0.00640673	0.00299338	0.0129929
linh2	0.000559141	0.000267988	0.00188983	0.00477094	0.00495636	0.00488733		0.00148712	0.00176093	0.00159019	0.00516722	0.00911077		0.00110284	0.00188385	0.00304701	0.00971049	0.00474801		0.00448064	0.005542	0.00761785	0.00680279		0.0270333	0.0353045		0.00793307	0.00155601	0.00658457	0.00175153	0.0184123
lioh	6.44412e-05	0.00106248	0.00184176	0.00507096	0.00648522	0.00666366		0.00120988	0.0008684	0.0014397	0.0113361	0.0146753		0.00120059	0.000608009	0.00267426	0.00871326	0.00623739		0.00300005	0.00642336	0.00620159	0.00836029		0.0220896	0.0335404		0.00571702	0.000411417	0.00527503	0.00186211	0.0235892
lithiumfluoride	0.0001865	0.001054	0.002021	0.003318	0.005882	0.005948		0.002744	0.00029	0.000242	0.01628	0.017096		0.000789	0.004946	0.000405	0.008389	0.005133		3e-05	0.004423	0.002499	0.012685		0.067757	0.032622		0.00383562	0.000412135	0.00315433	0.00191732	0.0293346
lithiumhydride	2.9e-05	0.000142	0.000211	0.003709	9.8e-05	5.5e-05		0.0005605	0.001465	0.001306	0.002458	0.001806		0.000207	0.001038	0.000194	0.008699	0.000914		0.000328	0.000203	0.016115	0.002846		0.023645	0.03187		0.000312321	0.000653113	0.000189858	0.000636924	0.000333046
methane	0.00133346	0.00251645	0.00202126	0.00861663	0.00445241	0.00433622		0.00155457	0.00320687	0.0027638	0.0112487	0.0049404		0.00151366	0.00244057	0.0021912	0.0119226	0.00577696		0.00221851	0.00197683	0.00519447	0.00342685		0.0155198	0.0143719		0.00354523	0.00184387	0.00699371	0.00232102	0.0145419
methoxy-ethane	0.0138337	0.0183535	0.0181102	0.0303925	0.0272578	0.0268838		0.0165281	0.0199007	0.0196165	0.0331313	0.0271507		0.0181816	0.0193473	0.0190187	0.0266645	0.0250638		0.0216986	0.021576	0.0259025	0.0249189		0.0402556	0.0603303		0.0279057	0.0198466	0.0308562	0.0203359	0.0221971
methyl_rad	0.000308674	0.00110052	0.000732809	0.00829188	0.00313714	0.00296914		0.000371795	0.00170049	0.00137544	0.0107961	0.00393988		0.000642888	0.00103146	0.000662094	0.0109261	0.00436405		0.00075291	0.00051141	0.00370626	0.00199921		0.0139103	0.0139025		0.00178397	0.000421022	0.00561762	0.00100204	0.0118557
methylalcohol	0.00169548	0.00247242	0.00236075	0.00784149	0.00530505	0.00526414		0.00183616	0.00289949	0.00284037	0.0115416	0.00822468		0.00233651	0.00342917	0.00342303	0.0117821	0.00816761		0.0045093	0.00456155	0.00791762	0.00657662		0.0181247	0.023131		0.00676209	0.0031202	0.00859966	0.00343097	0.0249607
methylamine	0.00231634	0.00434069	0.00401385	0.00890452	0.00614582	0.00590872		0.00231483	0.00343098	0.00304996	0.0113059	0.00777173		0.00259983	0.00449226	0.00487946	0.0159147	0.010616		0.0066902	0.00699429	0.0085241	0.00701636		0.0231541	0.0308135		0.0133539	0.00585821	0.014252	0.00629676	0.0478705
methylene_singlet	0.000204563	0.00132256	0.001485	0.00665679	0.00378799	0.00388279		0.000289506	0.00136886	0.00119458	0.0108147	0.0106872		0.00075494	0.0021889	0.00212054	0.0121022	0.00702691		0.00414888	0.00439476	0.0115108	0.00940599		0.0133206	0.0179414		0.00481416	0.00198749	0.00675545	0.00185296	0.0223267
methylene_triplet	0.000337926	0.00119863	0.000740222	0.00724518	0.00247975	0.00236128		0.000405424	0.00114391	0.000847713	0.00916126	0.00294608		0.000138939	0.000799325	0.00101778	0.00950372	0.00453929		0.0034588	0.00276612	0.00879284	0.00730085		0.0125763	0.0122738		0.0013815	0.000713098	0.00426041	0.00125801	0.0247528
methylenecyclopropane	0.00396447	0.00512673	0.00498183	0.014572	0.0092675	0.00910936		0.0040715	0.0058085	0.00557636	0.0184274	0.0099154		0.00425942	0.0054426	0.0052666	0.0188337	0.0121522		0.00493533	0.00518211	0.0150708	0.00927407		0.0410398	0.0301444		0.0077922	0.00497385	0.0123746	0.00523247	0.0217338
methylformate	0.0081509	0.0113623	0.0107888	0.0178904	0.0136504	0.013425		0.00863763	0.0107135	0.010389	0.0170644	0.0102527		0.00853341	0.00884809	0.00852312	0.0132158	0.00931321		0.00598931	0.00589202	0.00976796	0.00841818		0.0275299	0.0502765		0.0168853	0.0115994	0.020931	0.0120188	0.048689
methylnitrite	0.00754424	0.00943905	0.00945345	0.0151733	0.0121501	0.0120657		0.0080554	0.0099009	0.00959852	0.0151134	0.0120326		0.00748517	0.00839741	0.0102074	0.0128512	0.00995142		0.00967903	0.00668303	0.00761645	0.00926032		0.0260023	0.0550731		0.0171447	0.0105283	0.019305	0.0108629	0.0419083
n2	1.7e-05	0.000597	0.00042	0.006055	0.004125	0.004064		5e-05	0.000541	0.000445	0.005641	0.002612		0.000169	0.000801	0.000576	0.007864	0.004948		0.000416	0.000484	0.008305	0.004913		0.020748	0.016477		0.00270852	0.000576116	0.00549744	0.00103118	0.00148708
nh_rad	3.25e-05	0.000349	0.000406	0.005609	0.002669	0.002636		2.4e-05	0.001103	0.001077	0.004966	0.001796		0.000138	0.000834	0.000809	0.007409	0.003975		0.000322	0.000763	0.003739	0.0031675		0.009069	0.013019		0.00255462	0.000354283	0.00544809	0.000708104	0.00957393
nh2_rad	0.000451428	0.000809242	0.00058387	0.00587531	0.00253715	0.00256983		0.000283315	0.00184827	0.00148002	0.0105288	0.00940082		0.00097917	0.00289661	0.00287702	0.012514	0.00766168		0.0051837	0.00518612	0.00620445	0.00487154		0.0113582	0.0170819		0.00678805	0.000683541	0.00797062	0.00109189	0.0195495
nitricoxide	5.3e-05	0.000701	0.00066	0.0054385	0.004583	0.004544		9.3e-05	0.000441	0.000576	0.002513	0.002149		0.00035	0.001052	0.001035	0.005604	0.004172		0.000893	0.001063	0.007684	0.006142		0.019144	0.024224		0.00501538	0.00110509	0.00702105	0.00112351	0.00395713
nitrogentrifluoride	0.00101075	0.00211433	0.00239837	0.00907961	0.00854674	0.00880531		0.00151236	0.00186247	0.00233734	0.00607009	0.00182187		0.00146216	0.00285487	0.00287021	0.00635627	0.00761677		0.000239908	0.000626058	0.00498717	0.00751565		0.0206148	0.0622249		0.0112809	0.00410496	0.0124113	0.00427954	0.0123346
nitro-methane	0.00349683	0.00382225	0.00405863	0.00868918	0.00711481	0.00703177		0.00362757	0.00408927	0.00427461	0.0100192	0.00746658		0.00382286	0.00466387	0.00474777	0.0112315	0.00821112		0.00514538	0.00531059	0.00982083	0.00816262		0.02681	0.0315266		0.00939707	0.00440168	0.010196	0.0043319	0.0254381
nitrousoxide	0.00010193	0.000875108	0.000845948	0.00781327	0.00645862	0.00644929		0.000132998	0.000523911	0.00060697	0.00480235	0.00259305		0.000263149	0.0011296	0.000705405	0.00879847	0.00621491		0.000622085	0.000627202	0.0107613	0.0078009		0.0293525	0.0344555		0.00570712	0.00124549	0.00982865	0.00138232	0.000803638
no2	0.000263121	0.00147419	0.00148545	0.0073346	0.00688175	0.00695882		0.000408834	0.000703732	0.00103762	0.00301113	0.00374256		0.000590925	0.00173489	0.0018929	0.00729916	0.00630004		0.00179957	0.00202925	0.00999675	0.00872622		0.0244676	0.0387147		0.00794676	0.00177642	0.00969175	0.00175469	0.00676053
o2	0.000114	0.000793	0.001142	0.005891	0.005902	0.005977		0.000271	0.000401	0.000578	0.001479	0.00095		0.000508	0.001334	0.001523	0.003369	0.003831		0.000883	0.001164	0.005988	0.006386		0.015879	0.030383		0.00760244	0.00165911	0.00827267	0.00159155	0.00486364
oh_rad	5.9e-05	1e-05	0.00015	0.004355	0.001153	0.001127		7.2e-05	0.001176	0.000907	0.002649	0.00033		0.000109	0.000299	0.000366	0.0043375	0.001149		0.000525	0.00011	0.002209	0.001659		0.00702	0.008784		0.00188888	0.00053098	0.00514892	0.00104013	0.010097
ozone	0.000441459	0.00152912	0.00204843	0.00862195	0.0086049	0.00887758		0.000823833	0.00105393	0.00131279	0.00154899	0.00325957		0.00107099	0.00298603	0.0030235	0.00611852	0.00735282		0.00217571	0.00243034	0.00864036	0.00977293		0.0221968	0.0578917		0.011502	0.00267199	0.0121934	0.00260867	0.0122306
propane	0.0122365	0.0139222	0.0136825	0.0262739	0.0210595	0.0208407		0.0122463	0.0152688	0.0147824	0.027072	0.0210956		0.0116213	0.014588	0.0140497	0.0244263	0.0208153		0.0144994	0.0143848	0.020155	0.0169836		0.0362605	0.0358085		0.0181928	0.013731	0.0221879	0.0144787	0.0241282
propene	0.0032928	0.00475113	0.00442667	0.0151719	0.0105527	0.0104046		0.00362212	0.00543201	0.00496588	0.0190139	0.0108245		0.00376449	0.00468164	0.00447988	0.0174122	0.0112313		0.00446902	0.00444514	0.0122925	0.00779521		0.0369291	0.0259243		0.00868642	0.00464439	0.0121905	0.00485902	0.0201967
propyne	0.00217379	0.00300032	0.00277712	0.0129678	0.00594402	0.00566924		0.00222574	0.00386618	0.00339583	0.017266	0.00574993		0.00234214	0.00330074	0.0032423	0.0177807	0.0095668		0.00289852	0.00292604	0.012769	0.0062043		0.0419752	0.023729		0.00522648	0.00268631	0.0112346	0.00291913	0.0197448
pyridine	0.00369365	0.00509091	0.00468083	0.0145961	0.0102695	0.00998518		0.00413553	0.00561697	0.00543077	0.0182184	0.0103722		0.00411798	0.00517706	0.00492135	0.0181039	0.0119075		0.00454455	0.00459994	0.0133636	0.00933823		0.0406741	0.0289223		0.00878649	0.00484908	0.0126539	0.00506838	0.0192183
pyrrole	0.00201654	0.00331195	0.00308766	0.0111883	0.00696521	0.00669021		0.00248396	0.00363096	0.00355419	0.0143599	0.00736645		0.00240682	0.00331143	0.0031698	0.0148439	0.00913288		0.00267688	0.00273451	0.00960731	0.00634593		0.0352107	0.0244682		0.00621652	0.00297951	0.00974546	0.00316719	0.0183625
spiropentane	0.00490506	0.00718482	0.00702383	0.0166883	0.0120328	0.0119166		0.0056475	0.0081572	0.00781065	0.0199493	0.0126596		0.00542592	0.00799635	0.00766154	0.0212075	0.0148885		0.0071809	0.00735095	0.0172534	0.0119286		0.0440922	0.0330499		0.0106762	0.00709022	0.0146879	0.00734701	0.0260411
t-butyl_rad	0.0156114	0.0205015	0.0224452	0.0288124	0.0238081	0.0243558		0.0161693	0.0198451	0.0207096	0.0355527	0.0271582		0.0221583	0.0240819	0.0232156	0.0327177	0.0287642		0.0247735	0.0254589	0.033386	0.0325058		0.0436086	0.0502807		0.0226204	0.0207043	0.0262565	0.0211036	0.0298227
tetrafluoroethylene	0.00109065	0.00221143	0.00222229	0.00703846	0.00578271	0.00583547		0.00141632	0.00218304	0.0023845	0.00480461	0.00303085		0.00125181	0.00219099	0.00211393	0.00861178	0.00726216		0.000487562	0.000446994	0.00798159	0.00799124		0.0303756	0.0404369		0.0082177	0.00249204	0.0100053	0.00244375	0.00787028
trans_butane	0.0195837	0.0220508	0.0219929	0.0331121	0.0293498	0.0290544		0.0200338	0.0239063	0.0234694	0.0348687	0.0296402		0.019664	0.0229685	0.0224448	0.0331442	0.0298693		0.0231448	0.022801	0.0295725	0.0263292		0.0496566	0.0445265		0.0267852	0.0222285	0.0299892	0.0226452	0.031603
trifluoro-acetonitrile	0.00102476	0.00153251	0.00161151	0.00558236	0.00370307	0.00368189		0.00110566	0.00161541	0.00188527	0.00544171	0.00211099		0.00109191	0.00161799	0.00168724	0.00731605	0.00515177		0.00126346	0.00113522	0.00652528	0.00518189		0.031763	0.0351065		0.00629177	0.00222956	0.00827339	0.00232974	0.00836096
trifluoro-borane	0.000273254	0.000829858	0.000389917	0.00547786	0.000794726	0.000837903		0.000761062	0.00224903	0.00225173	0.000692084	0.000605157		0.000445965	0.00184191	0.00139838	0.00845446	0.00628857		0.000928839	0.00128785	0.00480273	0.0018956		0.0176762	0.0325111		0.00554281	0.00183755	0.00995556	0.0019492	0.00434368
trifluoro-methane	0.000905999	0.00143933	0.00148157	0.00428614	0.00334392	0.00339197		0.00105255	0.001679	0.00185453	0.00507453	0.00179442		0.000828935	0.00129341	0.00122716	0.00621767	0.00516255		0.00139094	0.00105745	0.00356137	0.00415961		0.0170748	0.0343985		0.00625466	0.00215886	0.00755687	0.00222552	0.00881092
trimethylamine	0.0154255	0.0224559	0.0215397	0.038771	0.03224	0.0318509		0.0184397	0.0234957	0.0218333	0.0473626	0.0323184		0.0214236	0.0217455	0.0213584	0.027996	0.0258959		0.0215232	0.0216535	0.0291435	0.026244		0.036755	0.0849061		0.0345884	0.022945	0.0405771	0.0243014	0.0435184
Trimethylborane	0.0166037	0.0202919	0.020232	0.0237935	0.0224205	0.0226851		0.0145269	0.0200824	0.0200558	0.0226489	0.0210094		0.0175885	0.0204698	0.020368	0.0261142	0.0232517		0.0194406	0.020156	0.024764	0.0225192		0.0529321	0.0391569		0.0201547	0.0201591	0.022324	0.0199942	0.0385718
water	0.000433811	0.00119237	0.000916882	0.00438034	0.00233324	0.0019851		0.000167127	0.00291581	0.00260217	0.0086298	0.00715738		0.000820764	0.00244506	0.00261103	0.0110069	0.00662158		0.00597391	0.00606681	0.00458048	0.00340313		0.0097093	0.0135828		0.00891549	0.00180605	0.00910886	0.00210784	0.0194068
1-chloro-propane	0.00803365	0.00907175	0.00910068	0.0223937	0.0194982	0.0194982		0.00819386	0.0110819	0.0107253	0.022571	0.0205043		0.00795542	0.0103515	0.0105339	0.0207745	0.0190459		0.00966317	0.00960871	0.0162248	0.0134595		0.0404938	0.0469894		0.0163943	0.00948593	0.0196373	0.0100358	0.022478
acetylchloride	0.00238807	0.00398001	0.00391231	0.0125267	0.012002	0.012002		0.00254921	0.00343528	0.00334598	0.0100704	0.00733115		0.00326179	0.00510356	0.00554809	0.0136021	0.0111611		0.00644726	0.00590832	0.0119301	0.0120532		0.0353333	0.0411662		0.00982469	0.00349705	0.0112626	0.00364624	0.0231482
al2h6	0.00140101	0.00274155	0.00260111	0.0100355	0.00702754	0.00702754		0.00136088	0.00480216	0.00515755	0.0126655	0.00983396		0.00240518	0.00749515	0.00781112	0.0202794	0.0136293		0.00396683	0.00357362	0.0128792	0.00603961		0.0415267	0.0300391		0.00836253	0.0024103	0.0206679	0.00249697	0.0205157
al2o3	0.000620372	0.0024997	0.00182486	0.020756	0.0081031	0.0081031		0.00241069	0.00367004	0.00297487	0.0183776	0.0158678		0.00709399	0.0143636	0.0141391	0.0490844	0.0374554		0.00559078	0.00319797	0.0230238	0.0114444		0.0495655	0.0631299		0.0192841	0.00370694	0.022873	0.00380538	0.00356356
al2	0.000163	2.7e-05	0.000342	0.006152	0.005354	0.005354		0.000202	0.001533	0.001708	0.002875	0.005221		0.000891	0.003522	0.004747	0.011214	0.010737		0.0016246	0.0014632	0.006461	0.003417		0.038737	0.051304		0.00602508	0.000643514	0.0131145	0.000662161	0.00677783
Al3P3H6	0.00205135	0.0029571	0.00271835	0.0162576	0.0122755	0.0122755		0.00198452	0.00510351	0.00535901	0.0157648	0.0136723		0.00325052	0.00993711	0.0114444	0.0293965	0.024581		0.00461314	0.00438731	0.0188141	0.0119431		0.0665985	0.056789		0.0156344	0.00326032	0.0209789	0.00347073	0.0223941
alcl	9.4e-05	6.9e-05	6.5e-05	0.009637	0.007698	0.007698		0.00074	0.002149	0.002188	0.001897	0.00421		0.002556	0.006899	0.007333	0.021826	0.022006		0.0033315	0.003412	0.00884	0.006409		0.042153	0.073149		0.0127241	0.00115725	0.0218204	0.00124582	0.0122571
alh2ph2	0.00681721	0.0158107	0.0148797	0.0508231	0.0513642	0.0513642		0.00714913	0.00809732	0.00819496	0.0278359	0.0289393		0.010929	0.0166971	0.0157576	0.0236845	0.0248613		0.0105086	0.00970153	0.0350366	0.0484656		0.0329878	0.12501		0.0362881	0.0092672	0.0238912	0.00956479	0.0194074
alh3	0.000624352	0.00126797	0.000909571	0.00726322	0.00424492	0.00424492		0.000752864	0.0029443	0.00269879	0.00922019	0.00683475		0.00155799	0.00490806	0.00488477	0.0139032	0.00871984		0.00316879	0.00225176	0.00996387	0.00347729		0.0256635	0.0121188		0.00516822	0.00176761	0.0113865	0.00188493	0.0172392
alh	0.000387	0.001445	0.001274	0.005479	0.003328	0.003328		0.000417	0.00195	0.001827	0.00527	0.004296		0.000866	0.003873	0.004043	0.011973	0.008565		0.0024509	0.0017092	0.00756	0.001962		0.020634	0.017408		0.00542331	0.000971286	0.0133739	0.00103253	0.0126406
al-ph2	0.0221715	0.0425149	0.040462	0.114035	0.115941	0.115941		0.0215859	0.0289451	0.0275541	0.0697994	0.0731899		0.0298844	0.03991	0.0393535	0.05159	0.0580477		0.024452	0.0260969	0.0796473	0.0972675		0.0521278	0.235438		0.0753281	0.0281189	0.0648619	0.0280016	0.0200861
al-sih3	0.00883802	0.0116892	0.0105912	0.0220497	0.0201841	0.0201841		0.0149755	0.0155827	0.0155282	0.0194163	0.0183095		0.0136487	0.015406	0.0153818	0.0245034	0.0203076		0.00655777	0.00659987	0.0204535	0.0153207		0.0726498	0.0701592		0.0223488	0.00851859	0.023393	0.00816328	0.0205588
als	0.000125	0.000249	0.000198	0.006085	0.004564	0.004564		0.000456	0.00184	0.00166	0.00455	0.005125		0.001924	0.005489	0.005793	0.015298	0.013162		0.0026709	0.0025123	0.008235	0.004997		0.038416	0.048889		0.00811087	0.00101459	0.0133651	0.00104776	0.00531334
aluminumtrichloride	0.000344879	0.000840289	0.0006276	0.0101486	0.00807807	0.00807807		0.00122877	0.00311815	0.003273	0.0115349	0.0134609		0.004024	0.00997887	0.010521	0.0294976	0.0275294		0.00284297	0.00325208	0.0123373	0.00844325		0.0545036	0.0919899		0.014044	0.00189466	0.0195337	0.00190037	0.0182286
aluminumtrifluoride	0.000326418	0.000797612	0.000267293	0.0175169	0.0121402	0.0121402		0.0019843	0.00306279	0.00165143	0.0142441	0.0157298		0.00544476	0.0129695	0.0120892	0.040167	0.0353071		0.00520611	0.00309182	0.0104704	0.00747361		0.0346802	0.0485584		0.0123332	0.00221141	0.0108741	0.00235841	0.00364232
becl2	0.000233518	0.00101001	0.000802616	0.00479039	0.00157502	0.00157502		0.00181262	0.00778693	0.00172036	0.0107418	0.00186733		0.000413964	0.00318107	0.00290346	0.01188	0.00400737		0.000432498	0.000370689	0.00630499	0.000618904		0.0362345	0.0362329		0.00169033	0.00187388	0.00174125	0.00169489	0.00144319
besh	0.000752337	0.00369368	0.00572422	0.0312421	0.0314804	0.0314804		0.0025507	0.00783144	0.0040106	0.0120379	0.0156613		0.00255744	0.00592025	0.00535905	0.0202163	0.0112378		0.0032873	0.00294666	0.0138002	0.00955314		0.088924	0.0898703		0.0470861	0.00461573	0.0458854	0.00443005	0.0100746
besi2	0.000150814	0.000889755	0.00144036	0.00459258	0.00346354	0.00346354		0.00094222	0.00544746	0.00251619	0.0146658	0.00823787		0.00131216	0.00494194	0.00492122	0.0154004	0.0110286		0.00226051	0.00203077	0.0098244	0.00487279		0.0402562	0.221952		0.00800602	0.000968067	0.0127077	0.0010345	0.0102148
bes	6.9e-05	6.9e-05	2.6e-05	0.00115	0.000149	0.000149		0.000926	0.005169	0.001204	0.010546	0.001543		0.000276	0.002442	0.00199	0.010164	0.00328		0.001314	0.0009214	0.008149	0.001651		0.028487	0.024748		0.00110442	0.000503375	0.00119893	0.000584374	0.000704207
C2H6O2S	0.00348554	0.00653161	0.00673804	0.0304849	0.0304839	0.0304839		0.00324402	0.0059842	0.00637555	0.0310195	0.0315327		0.00744361	0.01276	0.0134429	0.0330253	0.0318499		0.00729185	0.00740578	0.0253121	0.0239864		0.0716798	0.115878		0.0190657	0.00468495	0.0203343	0.00498149	0.0510691
C2H6Si	0.00825837	0.0124225	0.0112002	0.029667	0.0248071	0.0248071		0.00890428	0.0126907	0.0118514	0.0285235	0.0211166		0.00941957	0.0129388	0.0127076	0.0276244	0.0225546		0.009572	0.0087652	0.0181606	0.0124047		0.0368428	0.0675931		0.0199162	0.0104405	0.0227341	0.0105646	0.0288171
carbondisulfide	0.000167382	0.0015889	0.00167545	0.0107508	0.00970733	0.00970733		0.000521741	0.000669527	0.000940604	0.00866221	0.00788654		0.00206329	0.00453319	0.00484999	0.0150537	0.0133391		0.00210681	0.00181899	0.00966977	0.00680142		0.0486477	0.0367897		0.00593271	0.000274703	0.00754652	0.00021777	0.0112216
carbonmonosulfide	0.000146	0.001455	0.001324	0.008667	0.007398	0.007398		0.000452	0.000857	0.00082	0.005153	0.004912		0.001582	0.003539	0.003745	0.011615	0.009878		0.0022636	0.0023853	0.009742	0.00616		0.034027	0.033861		0.00490522	0.000537197	0.00670026	0.00063712	0.00645364
carbontetrachloride	0.000965216	0.00367539	0.00394713	0.0166201	0.0164964	0.0164964		0.00129536	0.0016541	0.0020212	0.00951084	0.00973893		0.00294598	0.00539507	0.00639052	0.0158219	0.0156524		0.0034956	0.00404457	0.0144071	0.0147294		0.0467117	0.0708277		0.0102339	0.00148897	0.0115219	0.00163975	0.0182679
carbonylsulfide	0.000103396	0.000943772	0.00102041	0.00889358	0.00706312	0.00706312		0.000154151	0.000708816	0.000846299	0.00636016	0.00453184		0.00118657	0.00312775	0.00329355	0.0117053	0.00888492		0.0019656	0.0018434	0.0102515	0.00618254		0.0375253	0.0310923		0.00488908	0.000650731	0.00795875	0.00077596	0.00787819
CF3Cl	0.00076201	0.00192043	0.00214426	0.00648655	0.00673055	0.00673055		0.000989852	0.00130878	0.00165915	0.00371328	0.00365004		0.00192057	0.00314229	0.0037241	0.00737863	0.00746176		0.00445185	0.00454978	0.00671334	0.00730018		0.0248941	0.0468916		0.00724853	0.00190949	0.0080726	0.00200627	0.0141615
ch3mgcl	0.00111688	0.00556509	0.00298424	0.0306857	0.0184923	0.0184923		0.000948139	0.00312851	0.00229439	0.0163956	0.0153878		0.00143946	0.00318475	0.00353314	0.0150873	0.00833096		0.00322984	0.00297194	0.0122963	0.00876563		0.0520613	0.0577609		0.016054	0.00773013	0.048522	0.0139616	0.0282952
CH3PH2	0.00248009	0.00495064	0.00456621	0.0142714	0.0114038	0.0114038		0.00248616	0.00315456	0.00328005	0.0139514	0.0102249		0.00338094	0.00539387	0.00566341	0.0164066	0.0124475		0.0042546	0.00419869	0.0114199	0.00934579		0.0252638	0.0424864		0.00895182	0.00267766	0.012236	0.00328649	0.0171359
ch3s_rad	0.000847425	0.00217743	0.00223331	0.0106	0.00954002	0.00954002		0.00100943	0.00202158	0.00214165	0.0117037	0.00888482		0.00202434	0.0037327	0.00413163	0.0125325	0.009871		0.00259604	0.00231976	0.00913832	0.00850647		0.0331254	0.0380405		2.45138e-16	0.00133843	2.45138e-16	0.00144691	2.45138e-16
chlorinemonofluoride	0.000327	0.003999	0.004001	0.022424	0.02196	0.02196		0.000872	0.001471	0.001474	0.011413	0.014407		0.00307	0.005128	0.005106	0.019955	0.022126		0.0050459	0.0048134	0.012826	0.014766		0.046863	0.074208		0.0148696	0.00277867	0.0174693	0.00323185	0.0122632
chlorinemonoxide	0.000725	0.00671	0.00671	0.027326	0.027296	0.027296		0.001134	0.002754	0.003047	0.018359	0.021084		0.005375	0.009871	0.010132	0.027296	0.028266		0.0084748	0.008144	0.021847	0.022579		0.057672	0.099004		0.0191864	0.00331179	0.0212086	0.00342922	0.024835
chlorinetrifluoride	0.000732055	0.00910656	0.00833122	0.043801	0.0436142	0.0436142		0.00224454	0.00366816	0.00381994	0.0229306	0.0293065		0.00801167	0.0117604	0.01112	0.0375591	0.0406924		0.00903038	0.00856628	0.0165872	0.0212845		0.099106	0.179957		0.0324268	0.00505175	0.0368851	0.00565217	0.0141432
chloro-ethene	0.00174958	0.00391927	0.00361094	0.0129597	0.00987798	0.00987798		0.00186335	0.00334661	0.0030271	0.0137102	0.00799584		0.00249512	0.00397719	0.00424023	0.0149378	0.0106116		0.00358013	0.00371005	0.0111744	0.00855759		0.0388792	0.040259		0.00764702	0.00257901	0.0105096	0.00277186	0.0163205
chloroform	0.00117138	0.00365631	0.00396952	0.0154026	0.0150704	0.0150704		0.00149142	0.00228778	0.00263258	0.010699	0.00982959		0.00301123	0.00525531	0.00609456	0.0152287	0.0145196		0.00360486	0.00408128	0.0137899	0.014296		0.0422547	0.0633113		0.00998298	0.00195982	0.0111644	0.00211256	0.0184927
Cl2SO2	0.000589548	0.0084161	0.00833209	0.0415582	0.0405815	0.0405815		0.00188501	0.00392125	0.00416159	0.0351013	0.0382786		0.010688	0.019601	0.0202717	0.0484703	0.0478801		0.0111071	0.0117629	0.0342028	0.0357191		0.142151	0.205667		0.0257123	0.0025516	0.0292201	0.00261014	0.0259615
cl2	0.000202	0.005946	0.005837	0.023572	0.023089	0.023089		0.001086	0.002631	0.00249	0.023008	0.026411		0.005027	0.008111	0.008435	0.021013	0.022364		0.0058982	0.0063864	0.019758	0.022628		0.083351	0.102167		0.017043	0.00222989	0.017985	0.00234167	0.0146551
ClN	0.000873	0.006584	0.007426	0.025741	0.025781	0.025781		0.001427	0.00282	0.002818	0.016502	0.019755		0.005631	0.010534	0.011021	0.025945	0.025994		0.0099033	0.0098495	0.021917	0.021882		0.054683	0.097253		0.0187306	0.00288878	0.0200903	0.00293584	0.0255301
dimethylsulfide	0.00424429	0.00509198	0.00534121	0.0230437	0.0187931	0.0187931		0.00514702	0.00684247	0.00718125	0.0252195	0.0193942		0.00527645	0.00770189	0.00807312	0.0210136	0.0179438		0.00626057	0.00626864	0.0183475	0.0160964		0.0436792	0.0579361		0.0151063	0.00560519	0.0197757	0.00690156	0.030026
dimethylsulfoxide	0.0105887	0.0147002	0.0144733	0.0399452	0.0396149	0.0396149		0.0121208	0.0177692	0.0175281	0.0386015	0.0394789		0.01445	0.0187607	0.0191398	0.0356215	0.0372942		0.0231526	0.024348	0.0291259	0.0279358		0.0728598	0.100604		0.027625	0.0123952	0.0308718	0.0137302	0.0719617
disilane	0.00111559	0.00249372	0.0021819	0.0104919	0.00886116	0.00886116		0.00111648	0.0024509	0.00269554	0.014082	0.011572		0.00145587	0.00569678	0.00698235	0.0187592	0.0141629		0.00253034	0.00251048	0.0114422	0.00773287		0.0350205	0.159016		0.0116464	0.00169502	0.0172666	0.00185552	0.0182988
ethanethiol	0.00349513	0.00492709	0.00477725	0.0178327	0.0139049	0.0139049		0.00358792	0.00473391	0.0047359	0.0156927	0.0104436		0.00438894	0.0063839	0.00664519	0.0177552	0.0141812		0.00590431	0.00581216	0.0134539	0.0113603		0.043594	0.0430767		0.0102889	0.00423453	0.0135803	0.00449398	0.0202179
ethylchloride	0.00279737	0.00412556	0.00405809	0.0127817	0.00976169	0.00976169		0.00276556	0.00379538	0.00380039	0.0125674	0.0087701		0.00327678	0.00469125	0.00490973	0.0147755	0.0106904		0.00436041	0.00461739	0.0104354	0.00873521		0.0333061	0.0389923		0.00809166	0.0034991	0.0104526	0.0037067	0.0198655
H2CS	0.000206815	0.00142516	0.00131913	0.00999068	0.00693594	0.00693594		0.000309979	0.00138667	0.00139563	0.0115229	0.00695923		0.00127732	0.00264878	0.00283037	0.0127443	0.00861206		0.0014855	0.0014171	0.00783107	0.00517603		0.0308251	0.0293966		0.00410584	0.00042295	0.00673865	0.000725731	0.0128157
hydrogenchloride	8.1e-05	0.000821	0.000751	0.006748	0.005066	0.005066		6.3e-05	0.000475	0.000666	0.003665	0.002109		0.000714	0.001421	0.001658	0.00714	0.005139		0.0001811	0.0003584	0.002221	0.002708		0.017026	0.00819		0.00351168	0.000301602	0.00578706	0.000505113	0.00699269
hydrogensulfide	0.000476288	0.00161403	0.00140886	0.0113436	0.0102555	0.0102555		0.000710653	0.00257265	0.0025153	0.00621781	0.00494086		0.00178188	0.00323181	0.00352899	0.0103702	0.00879178		0.00175231	0.00187175	0.00695591	0.00763932		0.0334964	0.0194506		0.00946212	0.000739664	0.0115795	0.000954533	0.00869644
hypochlorousacid	0.000549235	0.00379602	0.0036367	0.018065	0.0172951	0.0172951		0.000866427	0.00198905	0.00198954	0.00988655	0.0123894		0.00323253	0.00607376	0.00619429	0.0177923	0.0177036		0.00718796	0.00738984	0.012308	0.0140746		0.0424439	0.0682488		0.0124306	0.00213752	0.0141145	0.00251635	0.0206473
li2ph	0.0334315	0.202114	0.146912	0.32479	0.36599	0.36599		0.040921	0.241932	0.24114	0.220721	0.282701		0.00934831	0.00961896	0.045239	0.0130681	0.0712341		0.0239724	0.0860667	0.215224	0.33817		0.0878656	0.447613		0.369926	0.000588835	0.373773	0.00141807	0.029416
li2s2	0.00235343	0.0135844	0.00918109	0.0233295	0.0231135	0.0231135		0.00291203	0.00256672	0.0027354	0.030615	0.0316278		0.00400025	0.0082627	0.0113057	0.0462245	0.0328337		0.00487234	0.00494704	0.0339563	0.0230561		0.0773345	0.185238		0.0272735	0.00240444	0.0288618	0.00254971	0.0148995
li2si2	0.000384243	0.0024727	0.00166331	0.0031215	0.00162222	0.00162222		0.00115006	0.00119298	0.000790253	0.00316507	0.00965864		0.00080386	0.0018201	0.00204778	0.014174	0.00628625		0.00297807	0.00107832	0.0165065	0.0088576		0.0710118	0.293536		0.00850457	0.000805682	0.0121493	0.00071685	0.0119948
licl	8.2e-05	0.000578	0.000833	0.003287	0.000326	0.000326		0.002143	0.001282	0.001067	0.007958	0.010665		0.000361	0.002219	0.000217	0.023922	0.000675		0.0012668	0.0004542	0.020117	0.002559		0.051816	0.070789		0.00163507	0.000157339	0.00151403	0.000112235	0.00560028
liph2	0.000471658	0.00149606	0.00131943	0.00699152	0.00621231	0.00621231		0.000602837	0.00257361	0.00259828	0.00700949	0.00897203		0.000955126	0.00182797	0.00221972	0.0136133	0.00726466		0.0018678	0.00106396	0.0106982	0.00413361		0.0371877	0.033628		0.00400817	0.000866612	0.00610409	0.00104561	0.00743393
lish	9.84762e-05	0.000566712	0.0010752	0.0038792	0.00314669	0.00314669		0.00126395	0.00203428	0.00192121	0.0100491	0.0119496		0.000369866	0.00163595	0.00114717	0.0194508	0.0035599		0.00116126	0.000530092	0.0171106	0.00241907		0.0426185	0.046068		0.00285813	0.000498366	0.00444798	0.000328155	0.00649591
methanethiol	0.00183725	0.00325059	0.00315424	0.0125898	0.0102697	0.0102697		0.0018838	0.0026015	0.002735	0.0127988	0.00888202		0.00296317	0.00448012	0.0047934	0.0143459	0.0107433		0.00366135	0.00367972	0.0100488	0.0086483		0.0394922	0.040211		0.0080273	0.00226381	0.010802	0.00264151	0.0161269
methylchloride	0.000772098	0.00217704	0.00216277	0.00974874	0.00824979	0.00824979		0.000992185	0.00201187	0.00199108	0.0111631	0.00767336		0.00190912	0.00321314	0.00352144	0.0117199	0.00843045		0.00246377	0.00256521	0.00773325	0.00752599		0.0288701	0.0384924		0.00630755	0.00138344	0.00788444	0.00156937	0.0156753
methylenechloride	0.00066925	0.00268562	0.00308982	0.0131647	0.0124254	0.0124254		0.000911264	0.00181126	0.00202991	0.0114843	0.00938061		0.0023073	0.00419834	0.0048094	0.013503	0.0121693		0.00285449	0.00318662	0.0111414	0.0116109		0.0366622	0.053121		0.00875476	0.00139017	0.00954961	0.00141403	0.0172312
methylsilane	0.00208883	0.00349443	0.00348875	0.0120571	0.0101069	0.0101069		0.00205645	0.00365302	0.00371258	0.0155725	0.0124563		0.00298718	0.00679034	0.00723892	0.0191579	0.0153188		0.00446741	0.00425769	0.0129157	0.00963154		0.0304975	0.0347808		0.0115146	0.00305662	0.013646	0.0033399	0.025972
mg2h4	0.000877736	0.0075746	0.00371975	0.0303924	0.0165825	0.0165825		0.00110585	0.00316436	0.00263606	0.0109491	0.0113557		0.00106743	0.00325314	0.00349643	0.014345	0.00685669		0.00313501	0.00254072	0.0177778	0.00990575		0.0666727	0.0575233		0.0238587	0.00683579	0.0810843	0.0166338	0.0433153
mg2	0.001446	0.002795	0.004696	0.025082	0.017007	0.017007		0.000293	0.000514	0.003392	0.007321	0.002032		0.002839	0.00564	0.002261	0.001941	0.000153		0.0114237	0.0052698	0.000935	0.003705		0.062885	0.05829		0.0251568	0.0248634	0.108466	0.0248791	0.0655271
mgc2	0.000623687	0.00606202	0.00406735	0.0274383	0.0141743	0.0141743		0.000203079	0.00384799	0.00262148	0.0152344	0.0118756		0.00176535	0.00372302	0.00340001	0.012507	0.00669409		0.00326419	0.00244948	0.0124823	0.00714573		0.035208	0.0431635		0.0128918	0.0083725	0.036976	0.0130661	0.019766
mg-ch32	0.00119766	0.00667301	0.00432724	0.0330478	0.019423	0.019423		0.000756084	0.00430138	0.00300577	0.0190713	0.0156763		0.000952268	0.00326035	0.00371136	0.0161334	0.0114199		0.00369223	0.00299453	0.0108535	0.00785292		0.0620204	0.0558661		0.0175714	0.00886109	0.0513551	0.0168712	0.0221873
mgcl2	0.000351094	0.00495124	0.00112268	0.0385558	0.0228333	0.0228333		8.16497e-06	0.00204124	0.000996942	0.0191158	0.0216608		0.0013807	0.00349216	0.00325782	0.0178919	0.00897248		0.00297303	0.00303606	0.017549	0.011164		0.0574079	0.0797619		0.0173246	0.00799386	0.0594988	0.0144923	0.0418247
mgf2	0.000572364	0.00828254	0.00397471	0.013019	0.00874794	0.00874794		0.000427844	0.00458463	0.00292306	0.00993758	0.00976938		0.00226823	0.00687735	0.00454135	0.00868344	0.00503452		0.00453809	0.00204042	0.00648951	0.00636622		0.0457663	0.021037		0.0131604	0.0131499	0.0310154	0.0206321	0.00169531
mgh2	0.00022617	0.0036032	0.00127618	0.0103295	0.0023311	0.0023311		0.000912843	0.00142152	0.00089488	0.00139948	0.00193836		0.000576447	0.00203716	0.00168851	0.00909414	0.0030439		0.00155543	0.000653034	0.0109974	0.00357136		0.0334021	0.0211856		0.00384094	0.00369017	0.0369447	0.009715	0.0308754
mgh	0.00034	0.003684	0.001916	0.01575	0.009092	0.009092		0.000628	0.002328	0.001327	0.003745	0.00455		0.000608	0.002304	0.001698	0.007498	0.003475		0.0020914	0.0012191	0.00798	0.003429		0.023143	0.013242		0.00904195	0.00368866	0.0387	0.00891295	0.0355122
mgoh	0.000684892	0.0445858	0.040447	0.0476465	0.0501209	0.0501209		0.004513	0.00432568	0.00233617	0.0643454	0.0151037		0.0303919	0.0873107	0.0821617	0.115266	0.0995664		0.0497737	0.0504137	0.143956	0.127341		0.175098	0.167762		0.0101455	0.0371134	0.0316672	0.0383503	0.276338
mgo	0.00054	0.005534	0.003589	0.012954	0.009982	0.009982		0.000265	0.002496	0.001953	0.009027	0.007835		0.001912	0.004462	0.00337	0.008999	0.007059		0.0026772	0.0017044	0.005143	0.00558		0.025955	0.023398		0.0116788	0.00851351	0.0264573	0.0131511	0.00518762
mgsh	0.00140872	0.0141447	0.0136548	0.0774788	0.0734651	0.0734651		0.0111273	0.0135991	0.012495	0.0304092	0.0379564		0.0100945	0.0114499	0.0112441	0.0291707	0.0210715		0.00681021	0.0063487	0.0184574	0.0150983		0.0980652	0.16685		0.0810084	0.0099044	0.105836	0.0174947	0.0411533
mgs	0.000265	0.003944	0.002228	0.017778	0.01042	0.01042		0.000305	0.001255	0.000725	0.011085	0.011054		0.001379	0.002996	0.002877	0.010079	0.006407		0.002969	0.0024761	0.010607	0.007241		0.034235	0.040157		0.0118893	0.00572288	0.0347053	0.00977824	0.0227638
na2c2	0.000415808	0.00505285	0.0027063	0.0117714	0.00618028	0.00618028		0.000750315	0.00357227	0.00222762	0.00565941	0.00264208		0.00206784	0.00375731	0.00216221	0.00953512	0.00693613		0.00636353	0.00451369	0.00428252	0.000886703		0.0701722	0.0696312		0.00781286	0.00297721	0.0157174	0.00596601	0.0109598
na2nh	0.00393257	0.0203985	0.0158138	0.0488951	0.0478043	0.0478043		0.00355966	0.0126871	0.00977456	0.0154498	0.0064078		0.0146113	0.0242528	0.020045	0.0203751	0.0147646		0.0164333	0.019804	0.00311269	0.0102507		0.0726635	0.0873516		0.0650253	0.00983542	0.0704376	0.0138619	0.0328511
na2o2	0.000813217	0.00606051	0.00575363	0.0137066	0.0125523	0.0125523		0.00177722	0.00496519	0.00496461	0.00519676	0.00997773		0.00617934	0.0106423	0.00959598	0.00790851	0.0102478		0.00314402	0.00335869	0.0112405	0.0126027		0.0564781	0.0558194		0.0130983	0.00594324	0.0174453	0.00923661	0.0463802
na2o	0.00052909	0.00685041	0.00475773	0.00185916	0.00371833	0.00371833		0.00272628	0.00316801	0.00267321	0.00235069	0.000518475		0.00609351	0.013326	0.0116677	0.00845074	0.00646257		0.00404125	0.00365194	0.00976367	0.00278997		0.0572348	0.0628768		0.00426076	0.0043357	0.0089234	0.00891507	0.0518261
na2ph	0.00713435	0.0341277	0.0523141	0.191396	0.195854	0.195854		0.00563731	0.0224771	0.0295052	0.031381	0.0466544		0.00103387	0.00475089	0.016666	0.00918461	0.0338649		0.0101014	0.0136809	0.0671586	0.101373		0.107387	0.199494		0.199678	0.0536079	0.202346	0.0567632	0.113854
na2s2	0.0104259	0.0213824	0.0336175	0.0745252	0.0498569	0.0498569		0.0281388	0.0826543	0.0660501	0.131325	0.118801		0.00630525	0.0425711	0.044099	0.144779	0.122552		0.0363103	0.0183143	0.103006	0.0853303		0.484193	0.484618		0.106999	0.0120561	0.0601671	0.020904	0.0686391
na2si2	0.000125006	0.00214424	0.000803225	0.0107035	0.00421025	0.00421025		0.000173003	0.00419127	0.00414393	0.00170342	0.0058663		0.00295995	0.00204138	0.00256491	0.0108411	0.0090396		0.00335574	0.0016833	0.0108986	0.00243397		0.107721	0.373644		0.0150597	0.000484347	0.0289045	0.00351924	0.0131358
na2	0.000222	0.000619	0.000969	0.002174	0.001418	0.001418		0.00101	0.004656	0.001208	0.013277	0.004704		0.008906	0.005166	0.001624	0.001987	0.001711		0.0115528	0.0036737	0.004058	0.000438		0.160362	0.278931		0.0021068	0.00204447	0.00214664	0.00201702	0.000268403
nach3	0.000783638	0.00353696	0.00254196	0.0137838	0.007635	0.007635		0.00101736	0.00135574	0.00105787	0.0118495	0.00458703		0.00116606	0.00402131	0.00290721	0.0112483	0.00648871		0.00102982	0.000948883	0.00665862	0.0027639		0.0477052	0.0753608		0.00667258	0.00281342	0.0111789	0.00357117	0.00999657
nacl	2.9e-05	0.003668	0.001614	0.010431	0.00738	0.00738		0.000462	0.003777	0.003833	0.011769	0.01248		0.002164	0.00661	0.003432	0.005195	0.003467		0.0023665	0.0016784	0.004967	0.002045		0.068938	0.060116		0.0103434	0.000493265	0.0210243	0.00254193	0.00514675
nanh2	0.000266408	0.00219929	0.00126803	0.00436214	0.00596677	0.00596677		0.000617954	0.00468989	0.00422344	0.00730056	0.00898174		0.000826832	0.00168704	0.0015233	0.0059995	0.00633458		0.0068161	0.0065586	0.00740513	0.00602697		0.0451771	0.0513648		0.00755232	0.0022986	0.00649748	0.00440951	0.0193272
naoh	0.000196582	0.0023534	0.00123926	0.00583313	0.00648604	0.00648604		0.000295419	0.00465823	0.00440599	0.0124169	0.0130358		0.000871869	0.00104588	0.000321783	0.0102304	0.0101621		0.0092714	0.0089091	0.00951241	0.00770636		0.0377758	0.0251153		0.000273171	0.003805	0.00375545	0.00651393	0.0286142
naph2	0.00238062	0.00913234	0.00851067	0.0468679	0.0494747	0.0494747		0.00259111	0.00188456	0.00242541	0.0162087	0.0119943		0.00470311	0.00650424	0.00535699	0.0105728	0.0101038		0.00292329	0.00369474	0.00584314	0.0121179		0.0495785	0.270804		0.0601301	0.0112462	0.0596669	0.0114856	0.012429
nash	0.000250424	0.0023505	0.000502725	0.00644886	0.00352934	0.00352934		0.000194614	0.0042405	0.00344594	0.00772811	0.00947077		0.00116233	0.00450301	0.00263685	0.00741111	0.00453629		0.0016517	0.00132196	0.00161751	0.00141398		0.0605866	0.0432253		0.00840884	0.000777725	0.0203035	0.00180541	0.00493476
nitrosylchloride	0.00116504	0.00626846	0.00582795	0.0250922	0.0234584	0.0234584		0.00296528	0.00240045	0.00233076	0.0110034	0.0181158		0.00472966	0.00889984	0.00796204	0.0192747	0.0226972		0.0144503	0.0138788	0.0144403	0.0180386		0.0349616	0.0632994		0.0190903	0.0025186	0.0202007	0.00270644	0.0233461
p2	0.000234	0.002074	0.002013	0.008407	0.007558	0.007558		0.000409	0.00134	0.00142	0.007237	0.006703		0.001656	0.004167	0.00485	0.012036	0.010975		0.0025315	0.0026966	0.009621	0.006388		0.024734	0.057206		0.00479779	1.06231e-05	0.00859803	2.02297e-05	0.00450158
P4	0.000634631	0.00159325	0.00138404	0.0115565	0.0114964	0.0114964		0.00126171	0.00169045	0.00230341	0.0143386	0.0152407		0.0043453	0.00880082	0.00978547	0.0246488	0.0241396		0.00398648	0.00400758	0.0114309	0.0130684		0.0348909	0.129012		0.00941436	0.0012546	0.0167141	0.00133141	0.00960249
PCl3	0.00170133	0.00901084	0.00919208	0.0277091	0.0278822	0.0278822		0.00202736	0.00389004	0.0046844	0.0203963	0.0226075		0.00629447	0.0116675	0.0130531	0.031866	0.0323609		0.00617239	0.00704219	0.0307776	0.0325676		0.0632677	0.152249		0.0213768	0.00226685	0.0260153	0.00221156	0.0174767
PCl5	0.000818364	0.00461651	0.00440487	0.0306957	0.0309517	0.0309517		0.00176205	0.00263347	0.00332217	0.0223002	0.0252537		0.0075894	0.0137654	0.0151155	0.0365178	0.0370374		0.00663567	0.00752299	0.0272745	0.0301757		0.0711119	0.181604		0.0177664	0.00132146	0.0250372	0.00136791	0.0194377
PF5	0.000501979	0.00284859	0.00280251	0.0268989	0.025472	0.025472		0.00132234	0.00264299	0.00305395	0.0228719	0.0252942		0.00473076	0.0101189	0.0103422	0.039317	0.0405609		0.00284137	0.00267021	0.0176119	0.0160423		0.0267478	0.123201		0.0149585	0.00171995	0.0216167	0.00199946	0.0151657
ph2_rad	0.000405557	0.0015615	0.00128367	0.0099542	0.00871999	0.00871999		0.000678263	0.00165734	0.00175967	0.0080268	0.0064113		0.0013847	0.00323651	0.00348509	0.0118543	0.00945459		0.00113259	0.00120901	0.00607572	0.00478514		0.0144015	0.0218054		0.00697457	0.000426083	0.0102417	0.000886139	0.00934179
phosphine	0.00119461	0.00346064	0.0030969	0.0119938	0.0104261	0.0104261		0.00148855	0.00214131	0.00206751	0.00858967	0.00688914		0.00224721	0.00407865	0.00413374	0.0125621	0.00988527		0.00243717	0.00246313	0.00811996	0.00902294		0.0150806	0.0269245		0.00870719	0.00163114	0.011606	0.00222387	0.00917357
phosphorustrifluoride	0.000593719	0.00283956	0.00285319	0.0255209	0.0244718	0.0244718		0.00141255	0.00274553	0.00335744	0.0196316	0.0218905		0.00423975	0.00877298	0.0088923	0.0360572	0.0378949		0.00262888	0.00228746	0.0143318	0.0130284		0.0272484	0.105803		0.0162859	0.00204855	0.0245207	0.00244063	0.0115051
PH	0.000198	0.001537	0.001464	0.007036	0.005737	0.005737		0.000309	0.001073	0.001216	0.006735	0.005487		0.000684	0.002397	0.00269	0.009601	0.007523		0.0004386	0.0002763	0.005189	0.003141		0.012364	0.014885		0.00345683	0.000324612	0.00725036	0.000470497	0.00887872
PN	0.000223	0.001834	0.001654	0.008556	0.007023	0.007023		0.000409	0.001714	0.001655	0.007602	0.006515		0.001647	0.004321	0.00453	0.012268	0.010253		0.0019017	0.0019003	0.008627	0.005776		0.017424	0.03964		0.00516299	0.000626181	0.0075446	0.000720719	0.00852224
POCl3	0.00128347	0.00572287	0.00574288	0.0260844	0.0259159	0.0259159		0.00210416	0.00374838	0.00417337	0.0232216	0.0256396		0.00774101	0.0148483	0.0159898	0.0377228	0.0370776		0.00789757	0.00851832	0.0230369	0.0232294		0.0577511	0.166863		0.0173059	0.00196276	0.022526	0.00194724	0.021805
PO	0.000229	0.002505	0.002295	0.013953	0.012543	0.012543		0.000814	0.002625	0.002613	0.013388	0.013149		0.002832	0.006555	0.006687	0.020548	0.019203		0.0026358	0.0024013	0.013152	0.010484		0.01763	0.06409		0.00862684	0.00099787	0.0133176	0.00108156	0.0133701
PS	0.000282	0.002466	0.002446	0.011583	0.011125	0.011125		0.00062	0.001511	0.001753	0.010101	0.010288		0.002678	0.005857	0.006662	0.015812	0.015044		0.0030769	0.0033939	0.012009	0.00995		0.041707	0.075589		0.00688639	0.000196371	0.0115221	0.000211117	0.00678957
S2Cl2	0.00176113	0.012046	0.0124722	0.0379096	0.0369846	0.0369846		0.00261307	0.00496575	0.00533348	0.038956	0.0421026		0.00775531	0.0132531	0.0145836	0.0384996	0.0392581		0.0094048	0.00971168	0.046883	0.051105		0.133261	0.17839		0.0348323	0.00474603	0.0342207	0.00458777	0.0304694
s2	0.000324	0.003681	0.003626	0.015502	0.015597	0.015597		0.000694	0.001898	0.00216	0.011936	0.013093		0.003678	0.007177	0.007973	0.017916	0.017768		0.0043242	0.0046446	0.014393	0.014337		0.079315	0.088562		0.00966261	0.000562062	0.0135936	0.000595161	0.00822548
[truncated: 31 more rows]

## Sheet: disp-LDA
	6-311++G(2df,2pd)						6-31++G(d,p)						6-311G(2df,2pd)						6-31G**						pc-1-u						pc-1-u X2C						pc-1						aug-pc-1						pc-2-u
[truncated: 26 more rows]
[truncated: 154 more columns]

## Sheet: IP-LDA
				Stuttgart					SBKJC					6-311G(2df,2pd)-u					6-311G(2df,2pd)					6-31G(d,p)-u					6-31G(d,p)					pc-1-u X2C					pc-1-u					pc-1					pc-2-u
[truncated: 265 more rows]
[truncated: 80 more columns]

[truncated: 9 more sheets: AE2-LDA, AE-LDA, Be, H, N, O-1.1, H-0.65, P, Mg]
