# Supplementary material for: Polarization consistent basis sets using the projector augmented wave method: a renovation brought by PAW into Gaussian basis sets
Source: Royal Society of Chemistry journal article supplement (doi:10.1039/d0cp05229a), 2020-01-01
Supplement: d0cp05229a2.pdf [file d0cp05229a2.pdf]

# **Polarization Consistent Basis Sets with Projector Augmented Wave Method: A Renovation Brought by PAW into Gaussian Basis Sets**

Quan Manh Phung,<sup>\*,†,‡</sup> Masaya Hagai,<sup>†</sup> Xiao-Gen Xiong,<sup>¶</sup> and Takeshi Yanai<sup>\*,†,‡</sup>

*†Department of Chemistry, Graduate School of Science, Nagoya University, Furo-cho,  
Chikusa-ku, Nagoya, Aichi, 464-8602, Japan*

*‡Institute of Transformative Bio-Molecules (WPI-ITbM), Nagoya University, Furo-cho,  
Chikusa-ku, Nagoya, Aichi, 464-8602, Japan*

*¶Sino-French Institute of Nuclear Engineering and Technology, Sun Yat-Sen University,  
Zhuhai, 519082, China*

E-mail: quan.phung@chem.nagoya-u.ac.jp; yanait@chem.nagoya-u.ac.jp

## **Electronic Supplementary Information (ESI)**

## List of Figures

- S1 (a) Pseudo wave functions  $\tilde{\Psi}(r)$  obtained with GTF-PAW method using uncontracted PAW- $L_n$  basis for  $\text{H}_2$  with  $d(\text{H-H}) = 0.76 \text{ \AA}$ . (b) The corresponding all-electron wave functions  $\Psi(r) = \tilde{\Psi}(r) + \sum_a (\phi^a(r) - \tilde{\phi}^a(r)) \langle p^a | \tilde{\Psi} \rangle$  where  $\phi^a(r)$ ,  $\tilde{\phi}^a(r)$ , and  $p^a(r)$  are partial all-electron waves, partial pseudo waves, and partial projectors, respectively. . . . . S3
- S2 Mean absolute errors (blue bars), maximum absolute errors (vertical blue lines), and error ranges (red circles) of the atomization energies per atom calculated with the PAW- $L_n$  and different all-electron basis sets and the SVWN exchange-correlation functional. The atomization energies calculated with pc-4 are used as references. The atomic energies were calculated as half the energies of the diatomic systems. Energies are in kcal/mol. . . . . S4

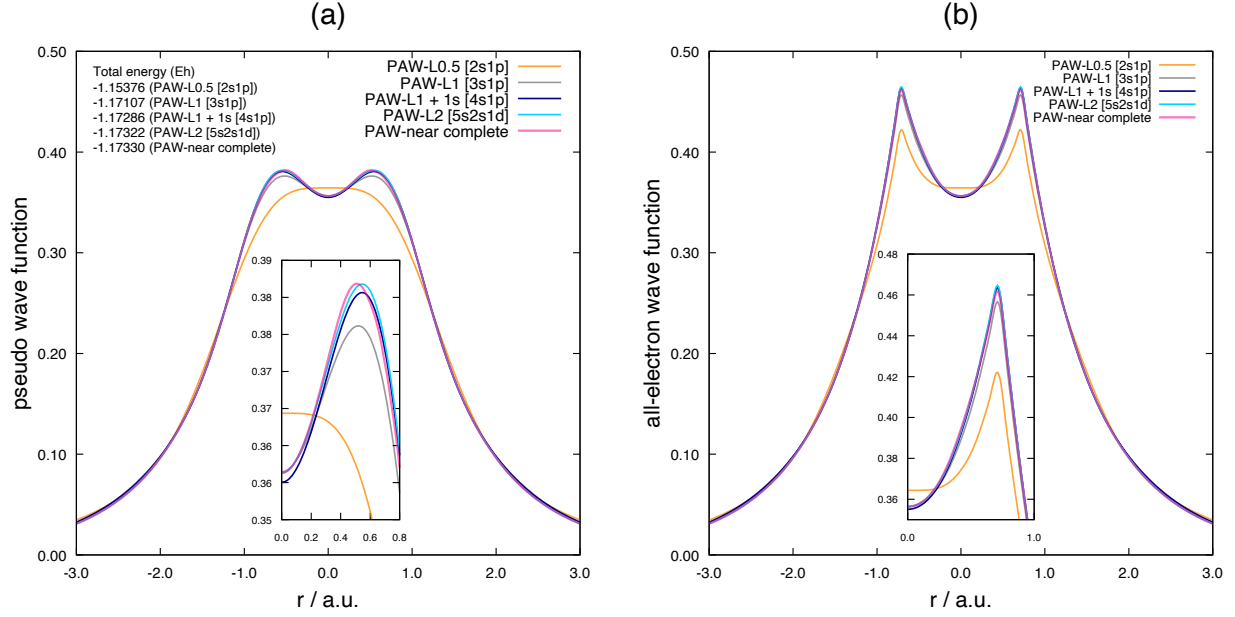

Figure S1: (a) Pseudo wave functions  $\tilde{\Psi}(r)$  obtained with GTF-PAW method using uncontracted PAW- $L_n$  basis for H<sub>2</sub> with  $d(\text{H-H}) = 0.76 \text{ \AA}$ . (b) The corresponding all-electron wave functions  $\Psi(r) = \tilde{\Psi}(r) + \sum_a (\phi^a(r) - \tilde{\phi}^a(r)) \langle p^a | \tilde{\Psi} \rangle$  where  $\phi^a(r)$ ,  $\tilde{\phi}^a(r)$ , and  $p^a(r)$  are partial all-electron waves, partial pseudo waves, and partial projectors, respectively.

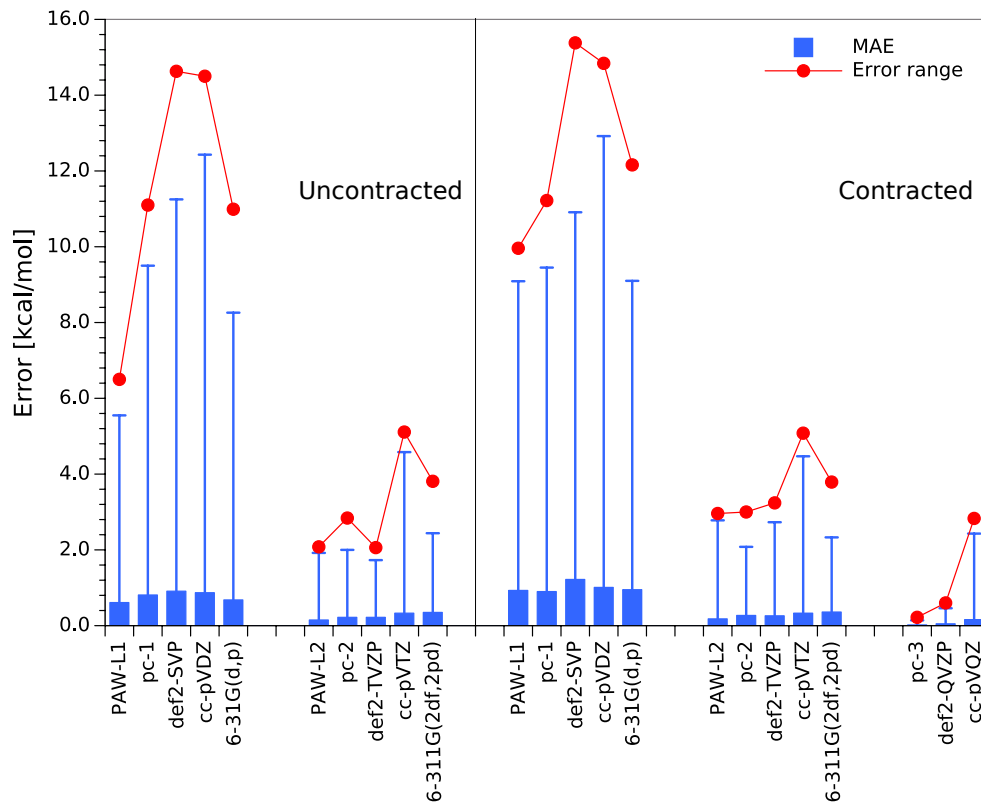

Figure S2: Mean absolute errors (blue bars), maximum absolute errors (vertical blue lines), and error ranges (red circles) of the atomization energies per atom calculated with the PAW- $L_n$  and different all-electron basis sets and the SVWN exchange-correlation functional. The atomization energies calculated with pc-4 are used as references. The atomic energies were calculated as half the energies of the diatomic systems. Energies are in kcal/mol.

## List of Tables

|    |                                                                                                                                                                                                                                                                                                                                                                                                                |     |
|----|----------------------------------------------------------------------------------------------------------------------------------------------------------------------------------------------------------------------------------------------------------------------------------------------------------------------------------------------------------------------------------------------------------------|-----|
| S1 | Summary of the most important parameters used to construct the PAW atomic dataset. . . . .                                                                                                                                                                                                                                                                                                                     | S6  |
| S2 | Systems used in the test set. . . . .                                                                                                                                                                                                                                                                                                                                                                          | S7  |
| S3 | Mean and maximum absolute errors (in kcal/mol) of atomization energies per atom and vertical ionization energies; mean and maximum root-mean-square deviation (RMSD) of atomic positions (in Å), calculated with different basis sets and the SVWN exchange-correlation functional. The values calculated with pc-4 are used as references. MAE = mean absolute error. MaxAE = maximum absolute error. . . . . | S8  |
| S4 | Mean and maximum absolute errors (in kcal/mol) of atomization energies per atom and vertical ionization energies; mean and maximum root-mean-square deviation of atomic positions (in Å), calculated with different basis sets and the BLYP exchange-correlation functional. The values calculated with pc-4 are used as references. MAE = mean absolute error. MaxAE = maximum absolute error. . . . .        | S9  |
| S5 | Mean and maximum absolute errors (in kcal/mol) of the binding energies of S22 complexes calculated with different contracted basis sets. The values calculated with pc-4 are used as references. MAE = mean absolute error. MaxAE = maximum absolute error. . . . .                                                                                                                                            | S10 |

Table S1: Summary of the most important parameters used to construct the PAW atomic dataset.

| Element | core electrons   | valence electrons | # partial-waves | $r_{\text{paw}}$ (Bohr) |
|---------|------------------|-------------------|-----------------|-------------------------|
| H       | -                | $1s^1$            | 3               | 0.70                    |
| Li      | -                | $1s^2 2s^1$       | 5               | 1.60                    |
| Be      | -                | $1s^2 2s^2$       | 5               | 1.45                    |
| B       | $1s^2$           | $2s^2 2p^1$       | 4               | 1.20                    |
| C       | $1s^2$           | $2s^2 2p^2$       | 4               | 1.00                    |
| N       | $1s^2$           | $2s^2 2p^3$       | 4               | 1.00                    |
| O       | $1s^2$           | $2s^2 2p^4$       | 4               | 1.00                    |
| F       | $1s^2$           | $2s^2 2p^5$       | 4               | 1.00                    |
| Na      | $1s^2$           | $2s^2 2p^6 3s^1$  | 5               | 1.90                    |
| Mg      | $1s^2$           | $2s^2 2p^6 3s^2$  | 6               | 1.90                    |
| Al      | $1s^2 2s^2 2p^6$ | $3s^2 3p^1$       | 6               | 1.65                    |
| Si      | $1s^2 2s^2 2p^6$ | $3s^2 3p^2$       | 6               | 1.65                    |
| P       | $1s^2 2s^2 2p^6$ | $3s^2 3p^3$       | 6               | 1.65                    |
| S       | $1s^2 2s^2 2p^6$ | $3s^2 3p^4$       | 6               | 1.65                    |
| Cl      | $1s^2 2s^2 2p^6$ | $3s^2 3p^5$       | 6               | 1.65                    |

Table S2: Systems used in the test set.

---

atomization energies and vertical ionization energies (G2-97' dataset)<sup>a</sup>

1,3-butadiene, 2-butyne, 2-methyl-1-propene, acetaldehyde, acetamide, acetic acid, acetone, acetonitrile, acetylene, acetyl fluoride, acrylonitrile, allene, ammonia, aziridine, B<sub>2</sub>, diborane(4), diborane(6), Be<sub>2</sub>, BeC<sub>2</sub>, Be(CH<sub>3</sub>)<sub>2</sub>, BeF, BeH<sub>2</sub>, benzene, BeO, BeOH, BeH, BF, BH, BH<sub>3</sub>, bicyclobutane, BN, BO, boranamine, borazine, boric acid, B<sub>2</sub>O<sub>3</sub>, C<sub>2</sub>, C<sub>2</sub>H<sub>3</sub><sup>·</sup>, C<sub>2</sub>H<sub>5</sub><sup>·</sup>, CO<sub>2</sub>, carbonic difluoride, CO, CF<sub>4</sub>, CCH<sup>·</sup>, CH<sup>·</sup>, CH<sub>3</sub>CH<sub>2</sub>O<sup>·</sup>, CH<sub>3</sub>CO<sup>·</sup>, CH<sub>3</sub>O<sup>·</sup>, CN<sup>·</sup>, cyanogen, cyclobutane, cyclobutene, cyclopropane, cyclopropene, OF<sub>2</sub>, difluoro methane, dimethylamine, dimethyl ether, ethane, ethanedial, ethanol, ethylamine, ethylene, ethylene oxide, F<sub>2</sub>, fluoro ethene, formaldehyde, formic acid, furan, H<sub>2</sub>, H<sub>2</sub>COH<sup>·</sup>, HCO<sup>·</sup>, hydrazine, HCN, HF, H<sub>2</sub>O<sub>2</sub>, isobutane, isopropanol, isopropyl radical, ketene, Li<sub>2</sub>, Li<sub>2</sub>C<sub>2</sub>, Li<sub>2</sub>NH, Li<sub>2</sub>O, Li<sub>2</sub>O<sub>2</sub>, LiCH<sub>3</sub>, LiNH<sub>2</sub>, LiOH, LiF, LiH, methane, methoxy ethane, methyl radical, methyl alcohol, methylamine, methylene singlet, methylene triplet, methylenecyclopropane, methyl formate, methyl nitrite, N<sub>2</sub>, NH<sup>·</sup>, NH<sub>2</sub><sup>·</sup>, nitric oxide, nitrogen trifluoride, nitro methane, nitrous oxide, NO<sub>2</sub>, O<sub>2</sub>, OH<sup>·</sup>, ozone, propane, propene, propyne, pyridine, pyrrole, spiropentane, t-butyl radical, tetrafluoro ethylene, trans butane, trifluoro acetonitrile, trifluoro borane, trifluoro methane, trimethylamine, trimethylborane, water, 1-chloropropane, acetyl chloride, Al<sub>2</sub>, Al<sub>2</sub>H<sub>6</sub>, Al<sub>2</sub>O<sub>3</sub>, Al<sub>3</sub>P<sub>3</sub>H<sub>6</sub>, AlCl, AlH, AlH<sub>2</sub>PH<sub>2</sub>, AlH<sub>3</sub>, Al(PH<sub>2</sub>)<sub>3</sub>, AlS, Al(SiH<sub>3</sub>)<sub>3</sub>, AlCl<sub>3</sub>, AlF<sub>3</sub>, BeCl<sub>2</sub>, BeS, Be(SH)<sub>2</sub>, BeSi<sub>2</sub>, methylsulfonylmethane, vinylsilane, CS<sub>2</sub>, CS, CCl<sub>4</sub>, carbonyl sulfide, CF<sub>3</sub>Cl, CH<sub>3</sub>MgCl, CH<sub>3</sub>PH<sub>2</sub>, CH<sub>3</sub>S<sup>·</sup>, ClF, ClO, ClF<sub>3</sub>, chloroethene, chloroform, Cl<sub>2</sub>, sulfuryl chloride, ClN, dimethyl sulfide, dimethyl sulfoxide, disilane, ethanethiol, chloroethane, thioformaldehyde, HCl, H<sub>2</sub>S, hypochlorous acid, Li<sub>2</sub>PH, Li<sub>2</sub>S<sub>2</sub>, Li<sub>2</sub>Si<sub>2</sub>, LiCl, LiPH<sub>2</sub>, LiSH, methanethiol, methylchloride, dichloromethane, methylsilane, Mg<sub>2</sub>, Mg<sub>2</sub>H<sub>4</sub>, MgC<sub>2</sub>, Mg(CH<sub>3</sub>)<sub>2</sub>, MgCl, MgF<sub>2</sub>, MgH, MgH<sub>2</sub>, MgO, MgOH, MgS, MgSH, Na<sub>2</sub>, Na<sub>2</sub>C<sub>2</sub>, Na<sub>2</sub>NH, Na<sub>2</sub>O, Na<sub>2</sub>O<sub>2</sub>, Na<sub>2</sub>PH, Na<sub>2</sub>S<sub>2</sub>, Na<sub>2</sub>Si<sub>2</sub>, NaCH<sub>3</sub>, NaCl, NaNH<sub>2</sub>, NaOH, NaPH<sub>2</sub>, NaSH, nitrosyl chloride, P<sub>2</sub>, P<sub>4</sub>, PCl<sub>3</sub>, PCl<sub>5</sub>, PF<sub>5</sub>, PH, PH<sub>2</sub><sup>·</sup>, PH<sub>3</sub>, PF<sub>3</sub>, PN, PO, phosphoryl chloride, PS, S<sub>2</sub>, S<sub>2</sub>Cl<sub>2</sub>, SCl, SCl<sub>2</sub>, SF<sub>6</sub>, SH<sup>·</sup>, Si<sub>2</sub>, disilyne, disilene, Si<sub>2</sub>H<sub>5</sub><sup>·</sup>, SiCl, SiCl<sub>2</sub>, SiH, silane, SiO, SiF<sub>4</sub>, SiH<sub>3</sub><sup>·</sup>, SiH<sub>2</sub> singlet, SiH<sub>2</sub> triplet, SiN, SiP, SiS, SN, SO<sub>3</sub>, NaF, NaH, SO<sub>2</sub>, SO, tetrachloroethylene, SiCl<sub>4</sub>, thiirane, thiophene, BCl<sub>3</sub>

---

noncovalent binding energies (S22 dataset)<sup>b</sup>

2-pyridoxine–2-aminopyridine, adenine–thymine stack, adenine–thymine Watson-Crick, ammonia dimer, benzene–methane, benzene–ammonia, benzene dimer parallel displaced, benzene dimer T-shaped, benzene–HCN, benzene–water, ethene dimer, ethene–ethyne, formamide dimer, formic acid dimer, indole–benzene stack, indole–benzene T-shape, methane dimer, phenol dimer, pyrazine dimer, uracil dimer H-bonded, uracil dimer stack, water dimer

---

<sup>a</sup>The structures of the neutral molecules were optimized. <sup>b</sup>Only single-point calculations.

Table S3: Mean and maximum absolute errors (in kcal/mol) of atomization energies per atom and vertical ionization energies; mean and maximum root-mean-square deviation (RMSD) of atomic positions (in Å), calculated with different basis sets and the SVWN exchange-correlation functional. The values calculated with pc-4 are used as references. MAE = mean absolute error. MaxAE = maximum absolute error.

| Basis set               | Atomization energies per atom |       | Atomization energies per atom <sup>b</sup> |       | Ionization energies <sup>a</sup> |       | RMSD  |       |
|-------------------------|-------------------------------|-------|--------------------------------------------|-------|----------------------------------|-------|-------|-------|
|                         | MAE                           | MaxAE | MAE                                        | MaxAE | MAE                              | MaxAE | Mean  | Max   |
| Uncontracted basis sets |                               |       |                                            |       |                                  |       |       |       |
| PAW-L0.5                | 1.74                          | 15.22 | 1.49                                       | 16.09 | 5.13                             | 34.58 | 0.021 | 0.276 |
| PAW-L1                  | 1.64                          | 8.37  | 0.61                                       | 5.55  | 1.49                             | 7.76  | 0.014 | 0.307 |
| pc-1                    | 1.94                          | 12.36 | 0.81                                       | 9.50  | 2.00                             | 11.30 | 0.015 | 0.366 |
| pc-1 X2C                | 2.05                          | 12.72 | 0.84                                       | 9.77  | 1.91                             | 11.39 | 0.015 | 0.366 |
| def2-SVP                | 1.15                          | 11.13 | 0.91                                       | 11.25 | 2.37                             | 10.92 | 0.013 | 0.283 |
| cc-pVDZ                 | 1.69                          | 13.81 | 0.87                                       | 12.43 | 2.13                             | 10.94 | 0.014 | 0.123 |
| 6-31G(d,p)              | 1.24                          | 9.65  | 0.68                                       | 8.26  | 2.78                             | 12.22 | 0.013 | 0.338 |
| PAW-L2                  | 0.28                          | 2.33  | 0.15                                       | 1.92  | 0.33                             | 2.54  | 0.005 | 0.054 |
| pc-2                    | 0.47                          | 3.02  | 0.22                                       | 2.00  | 0.51                             | 2.92  | 0.005 | 0.147 |
| def2-TZVP               | 0.32                          | 1.85  | 0.22                                       | 1.73  | 0.47                             | 3.44  | 0.006 | 0.241 |
| cc-pVTZ                 | 0.50                          | 4.82  | 0.33                                       | 4.58  | 0.80                             | 4.24  | 0.007 | 0.082 |
| 6-311G(2df,2pd)         | 0.43                          | 2.40  | 0.35                                       | 2.44  | 1.21                             | 5.58  | 0.005 | 0.086 |
| Contracted basis sets   |                               |       |                                            |       |                                  |       |       |       |
| PAW-L1                  | 2.38                          | 10.75 | 0.93                                       | 9.09  | 1.87                             | 8.57  | 0.019 | 0.374 |
| pc-1                    | 2.33                          | 12.55 | 0.90                                       | 9.45  | 2.12                             | 11.02 | 0.018 | 0.325 |
| def2-SVP                | 1.26                          | 9.76  | 1.22                                       | 10.91 | 2.79                             | 11.61 | 0.017 | 0.257 |
| cc-pVDZ                 | 2.15                          | 13.60 | 1.01                                       | 12.92 | 3.53                             | 13.60 | 0.018 | 0.145 |
| 6-31G(d,p)              | 1.44                          | 9.72  | 0.95                                       | 9.10  | 4.26                             | 15.22 | 0.015 | 0.215 |
| PAW-L2                  | 0.39                          | 3.09  | 0.18                                       | 2.78  | 0.40                             | 2.73  | 0.005 | 0.057 |
| pc-2                    | 0.47                          | 3.07  | 0.27                                       | 2.08  | 0.54                             | 3.07  | 0.006 | 0.202 |
| def2-TZVP               | 0.37                          | 2.90  | 0.26                                       | 2.73  | 0.54                             | 3.35  | 0.006 | 0.242 |
| cc-pVTZ                 | 0.53                          | 4.87  | 0.33                                       | 4.47  | 0.85                             | 4.06  | 0.007 | 0.087 |
| 6-311G(2df,2pd)         | 0.43                          | 2.33  | 0.36                                       | 2.33  | 1.23                             | 5.64  | 0.006 | 0.055 |
| pc-3                    | 0.03                          | 0.18  | 0.02                                       | 0.14  | 0.08                             | 1.11  | 0.002 | 0.033 |
| def2-QZVP               | 0.12                          | 0.62  | 0.05                                       | 0.46  | 0.19                             | 1.36  | 0.003 | 0.041 |
| cc-pVQZ                 | 0.24                          | 2.57  | 0.16                                       | 2.43  | 0.35                             | 2.02  | 0.004 | 0.041 |
| ECP basis sets          |                               |       |                                            |       |                                  |       |       |       |
| STRLC                   | 9.37                          | 50.97 | 3.21                                       | 34.21 | 7.02                             | 34.50 | 0.064 | 0.485 |
| SBK                     | 6.19                          | 35.78 | 1.71                                       | 28.50 | 4.03                             | 17.19 | 0.041 | 0.484 |

<sup>a</sup>Calculations of boric acid, isobutane, and trifluoroacetonitrile with PAW-*Ln* basis sets did not converge due to electronic degeneracy. <sup>b</sup>The atomic energies were calculated as half the energies of the diatomic systems.



Table S4: Mean and maximum absolute errors (in kcal/mol) of atomization energies per atom and vertical ionization energies; mean and maximum root-mean-square deviation of atomic positions (in Å), calculated with different basis sets and the BLYP exchange-correlation functional. The values calculated with pc-4 are used as references. MAE = mean absolute error. MaxAE = maximum absolute error.

| Basis set               | Atomization energies per atom |       | Atomization energies per atom <sup>b</sup> |       | Ionization energies <sup>a</sup> |       | RMSD <sup>c</sup> |       |
|-------------------------|-------------------------------|-------|--------------------------------------------|-------|----------------------------------|-------|-------------------|-------|
|                         | MAE                           | MaxAE | MAE                                        | MaxAE | MAE                              | MaxAE | Mean              | Max   |
| Uncontracted basis sets |                               |       |                                            |       |                                  |       |                   |       |
| PAW-L0.5                | 1.69                          | 14.64 | 1.54                                       | 16.17 | 6.06                             | 35.84 | 0.022             | 0.226 |
| PAW-L1                  | 1.47                          | 7.36  | 0.53                                       | 4.75  | 1.61                             | 8.68  | 0.013             | 0.182 |
| pc-1                    | 1.62                          | 10.54 | 0.81                                       | 8.63  | 1.79                             | 12.83 | 0.013             | 0.110 |
| def2-SVP                | 0.94                          | 9.10  | 0.81                                       | 10.07 | 2.85                             | 12.96 | 0.012             | 0.132 |
| cc-pVDZ                 | 1.34                          | 11.74 | 0.84                                       | 11.33 | 2.62                             | 12.82 | 0.014             | 0.125 |
| 6-31G(d,p)              | 1.07                          | 7.97  | 0.62                                       | 7.44  | 3.24                             | 14.03 | 0.011             | 0.089 |
| PAW-L2                  | 0.48                          | 1.88  | 0.19                                       | 1.53  | 0.71                             | 3.18  | 0.005             | 0.052 |
| pc-2                    | 0.40                          | 2.74  | 0.20                                       | 1.87  | 0.48                             | 2.81  | 0.005             | 0.037 |
| def2-TZVP               | 0.26                          | 1.69  | 0.22                                       | 1.69  | 0.61                             | 3.52  | 0.005             | 0.075 |
| cc-pVTZ                 | 0.42                          | 3.99  | 0.30                                       | 4.00  | 1.03                             | 4.74  | 0.007             | 0.053 |
| 6-311G(2df,2pd)         | 0.48                          | 2.83  | 0.35                                       | 2.49  | 1.59                             | 7.38  | 0.006             | 0.044 |
| Contracted basis sets   |                               |       |                                            |       |                                  |       |                   |       |
| PAW-L1                  | 2.23                          | 8.72  | 0.88                                       | 7.97  | 2.04                             | 9.39  | 0.016             | 0.106 |
| pc-1                    | 2.10                          | 10.73 | 0.87                                       | 8.53  | 1.92                             | 12.43 | 0.015             | 0.108 |
| def2-SVP                | 1.08                          | 8.25  | 1.14                                       | 9.85  | 3.31                             | 13.54 | 0.015             | 0.244 |
| cc-pVDZ                 | 1.88                          | 11.58 | 0.91                                       | 11.70 | 3.91                             | 15.29 | 0.018             | 0.137 |
| 6-31G(d,p)              | 1.22                          | 8.13  | 0.87                                       | 8.20  | 4.69                             | 16.73 | 0.013             | 0.102 |
| PAW-L2                  | 0.57                          | 2.51  | 0.22                                       | 2.09  | 0.73                             | 3.40  | 0.005             | 0.052 |
| pc-2                    | 0.47                          | 2.82  | 0.23                                       | 1.86  | 0.51                             | 2.88  | 0.005             | 0.037 |
| def2-TZVP               | 0.34                          | 2.59  | 0.26                                       | 2.62  | 0.68                             | 3.70  | 0.005             | 0.087 |
| cc-pVTZ                 | 0.43                          | 4.18  | 0.30                                       | 3.97  | 1.06                             | 4.70  | 0.007             | 0.054 |
| 6-311G(2df,2pd)         | 0.46                          | 2.67  | 0.34                                       | 2.44  | 1.63                             | 7.55  | 0.006             | 0.055 |
| pc-3                    | 0.04                          | 0.19  | 0.02                                       | 0.13  | 0.07                             | 0.80  | 0.003             | 0.040 |
| def2-QZVP               | 0.11                          | 0.53  | 0.05                                       | 0.41  | 0.22                             | 2.20  | 0.003             | 0.047 |
| cc-pVQZ                 | 0.22                          | 2.21  | 0.15                                       | 2.13  | 0.40                             | 2.08  | 0.004             | 0.041 |
| ECP basis sets          |                               |       |                                            |       |                                  |       |                   |       |
| STRLC                   | 8.43                          | 47.05 | 3.25                                       | 30.91 | 7.15                             | 34.48 | 0.053             | 0.562 |
| SBK                     | 5.36                          | 33.44 | 1.36                                       | 25.52 | 3.65                             | 16.39 | 0.027             | 0.229 |

<sup>a</sup>Calculations of boric acid with PAW- $L_n$  basis sets did not converge due to electronic degeneracy. <sup>b</sup>The atomic energies were calculated as half the energies of the diatomic systems. <sup>c</sup>The potential energy curve of Mg<sub>2</sub> is too shallow and the RMSD of Mg<sub>2</sub> was not included.

Table S5: Mean and maximum absolute errors (in kcal/mol) of the binding energies of S22 complexes calculated with different contracted basis sets. The values calculated with pc-4 are used as references. MAE = mean absolute error. MaxAE = maximum absolute error.

| Basis set             | SVWN |       | BLYP |       |
|-----------------------|------|-------|------|-------|
|                       | MAE  | MaxAE | MAE  | MaxAE |
| PAW-L0.5              | 6.87 | 14.08 | 9.19 | 21.23 |
| PAW-L1                | 1.47 | 3.49  | 1.39 | 2.68  |
| pc-1                  | 2.00 | 4.34  | 1.87 | 4.03  |
| def2-SVP              | 2.34 | 6.07  | 2.83 | 6.73  |
| cc-pVDZ               | 2.03 | 5.82  | 2.65 | 6.62  |
| 6-31G(d,p)            | 1.97 | 4.89  | 2.77 | 5.81  |
| aug-pc-1              | 1.81 | 4.61  | 1.54 | 3.90  |
| def2-SVPD             | 1.86 | 4.69  | 1.69 | 4.12  |
| aug-cc-pVDZ           | 0.74 | 1.87  | 0.68 | 1.65  |
| 6-31++G(d,p)          | 0.81 | 1.95  | 0.66 | 1.35  |
| PAW-L2                | 0.17 | 0.44  | 0.21 | 0.40  |
| pc-2                  | 0.34 | 0.95  | 0.29 | 0.64  |
| def2-TZVP             | 0.46 | 1.06  | 0.53 | 1.18  |
| cc-pVTZ               | 0.77 | 1.60  | 1.01 | 1.92  |
| 6-311G(2df,2pd)       | 1.63 | 3.24  | 1.49 | 3.82  |
| aug-pc-2              | 0.27 | 0.74  | 0.09 | 0.30  |
| def2-TZVPD            | 0.23 | 0.74  | 0.15 | 1.49  |
| aug-cc-pVTZ           | 0.17 | 0.44  | 0.18 | 0.50  |
| 6-311++G(2df,2pd)     | 0.50 | 1.46  | 0.30 | 0.83  |
| pc-3                  | 0.02 | 0.05  | 0.02 | 0.05  |
| def2-QZVP             | 0.12 | 0.33  | 0.16 | 0.40  |
| cc-pVQZ               | 0.36 | 0.78  | 0.50 | 1.04  |
| aug-pc-3              | 0.02 | 0.05  | 0.01 | 0.04  |
| def2-QZVPD            | 0.04 | 0.13  | 0.05 | 0.15  |
| aug-cc-pVQZ           | 0.09 | 0.31  | 0.10 | 0.34  |
| aug-pc-4 <sup>a</sup> | 0.00 | 0.01  | 0.00 | 0.01  |
| STRLC                 | 2.18 | 6.29  | 2.69 | 7.17  |
| SBK                   | 3.10 | 7.08  | 3.44 | 7.78  |

<sup>a</sup>Due to SCF convergence problem related to aug-pc-4 basis set linear dependencies, only 18 and 15 complexes were calculated with SVWN and BLYP, respectively
